# Supplementary material for: Asynchronous glacial dynamics of Last Glacial Maximum mountain glaciers in the Ikh Bogd Massif, Gobi Altai mountain range, southwestern Mongolia: aspect control on glacier mass balance
Source: Copernicus journal article supplement (doi:10.5194/tc-17-2409-2023), 2023-06-21
Supplement: Supplementary file 1 [file tc-17-2409-2023-supplement.zip]

Archive with 3 entries (3 files):
- Supplementary 1_Temperature and precipitation data since 22 ka_221128.xlsx
- Supplementary 2_ 2D ice surface modelling result_221128.xlsx
- tc-17-2409-2023-supplement-title-page.pdf
