# Supplementary material for: Asynchronous glacial dynamics of Last Glacial Maximum mountain glaciers in the Ikh Bogd Massif, Gobi Altai mountain range, southwestern Mongolia: aspect control on glacier mass balance
Source: Copernicus journal article supplement (doi:10.5194/tc-17-2409-2023), 2023-06-21
Supplement: Supplementary file 1 [file tc-17-2409-2023-supplement.zip › Supplementary 1_Temperature and precipitation data since 22 ka_221128.xlsx]

## Sheet: (0) Read me
Abbreviations
IA	Ih Artsan
JAR	Jargalant
S	South
N	North
T	Temperature
dT	Temperature difference between headwall altitude and weather station
SAT	Summer average temperature
ANN	Annual
JJA	June, July, August
DJF	December, January, February
MAM	March, April, May
Snow acc	Snow accumulation

## Sheet: (1) W.station Data
Present temperature and precipitation data
Archive and information department, NAMEM (National Agency Meteorology and the Environmental Monitoring)
Weather stations:		Bayangobi, Bayankhongor (S)
		Bogd (Horiult), Bayankhongor (N)
-	Missed data
Monthly mean air temperature (℃)
Station (S)	Year	1	2	3	4	5	6	7	8	9	10	11	12	Annual		Station (N)	Year	1	2	3	4	5	6	7	8	9	10	11	12	Annual
Bayangobi	1985	-21.8967	-20.1321	-	-0.417241	14.9742	20.47	20.0645	18.5032	11.3267	5.13871	-11.1033	-23.4194	1.22805		Bogd	1985	-15.4032	-13.8643	-8.19677	7.46333	15.5419	21.8033	21.4226	20.2387	12.2333	4.29355	-	-	6.55325
Bayangobi	1986	-19.9033	-19.4179	-	3.37	16.6968	21.62	21.6839	20.3903	14.62	1.99355	-12.61	-19.1774	2.66054		Bogd	1986
Bayangobi	1987	-	-15.8741	-11.4258	8.05333	17.2677	21.3067	21.7419	20.4516	16.6	-	-17.9034	-	6.69088		Bogd	1987
Bayangobi	1988	-21.0067	-17.4862	-10.1677	6.41	13.8226	20.59	22.2806	22.0194	15.0433	3.12258	-9.39	-15.4161	2.48515		Bogd	1988
Bayangobi	1989	-14.2452	-13.3571	-3.13871	6.18333	14.7387	19.31	21.5387	20.0645	14.0767	4.80968	-7.98	-9.92903	4.3393		Bogd	1989	-15.7903	-13.0286	-2.27097	8.21333	16.1226	20.7067	22.4258	20.5581	12.52	4.67742	-	-11.7226	5.67377
Bayangobi	1990	-15.4774	-12.025	-1.6	4.14	14.1065	18.3567	20.6129	19.1226	13.88	7.17419	-5.47	-11.6065	4.26783		Bogd	1990	-17.5581	-13.9321	-1.72258	4.88333	15.1355	19.2867	22.0742	19.8903	13.48	6.83226	-5.62	-12.2806	4.20574
Bayangobi	1991	-	-10.8074	-2.37742	4.45667	13.9742	21.1333	-	-	12.9966	5.97097	-3.76	-	5.19836		Bogd	1991	-15.4742	-10.8667	-2.8871	5.2	15.4258	21.3733	23.871	-	13.3517	5.13226	-	-15.11	4.00161
Bayangobi	1992	-19.1516	-17.8241	-8.59355	3.91667	12.1065	16.6667	17.9323	16.9258	13.43	-	-7.09333	-13.2323	1.37118		Bogd	1992	-19.071	-17.2276	-4.97419	8.39333	16.0323	20.7233	22.571	19.771	-	1.47667	-8.44333	-16.229	2.09295
Bayangobi	1993	-17.7903	-3.75	1.60323	3.53077	12.4226	21.8233	21.7742	20.9258	-	4.95333	-9.15667	-17.7065	3.5118		Bogd	1993	-19.3194	-9.60357	-1.91935	4.99333	14.3355	20.84	21.1645	18.4903	-	4.41	-7.97667	-	4.54147
Bayangobi	1994	-19.2367	-9.68571	-3.43871	6.64667	16.5968	20.4867	20.4	20.0226	10.7267	5.23871	-	-15.1387	4.78348		Bogd	1994	-17.1185	-12.2554	-4.21653	8.53083	14.7105	-	21.1754	19.9891	11.8787	3.44556	-3.38333	-15.1597	2.50879
Bayangobi	1995	-18.6452	-12.9643	-6.02903	4.1	11.6806	20.09	21.9452	21.829	-	2.73214	-2.95333	-15.6355	2.37724		Bogd	1995	-16.6206	-10.0223	-2.11653	5.66625	12.5556	20.0808	22.4629	21.1919	14.3692	6.19395	-4.325	-16.319	4.42644
Bayangobi	1996	-21.9258	-15.8828	-5.92903	-	13.34	14.1167	-	20.0367	13.0333	4.06129	-	-12.9387	0.879072		Bogd	1996	-19.1137	-13.6272	-4.99355	6.01875	15.8306	19.3129	23.1133	20.9819	14.0933	4.39798	-7.10292	-10.9371	3.99786
Bayangobi	1997	-15.5567	-10.4321	0.970968	7.74	16.1258	19.7267	22.3097	20.6258	11.9067	4.6871	-	-14.2167	5.80793		Bogd	1997	-17.3673	-11.2812	1.91815	8.50667	16.3649	20.41	22.5685	21.644	12.7325	5.21613	-6.48958	-13.4044	5.06819
Bayangobi	1998	-17.8839	-10.875	-3.15806	8.39667	14.229	20.9267	22.3677	19.929	15.4033	-	-	-11.8333	5.75022		Bogd	1998	-17.1254	-8.57723	-1.62258	9.37125	14.9754	21.275	22.8214	20.7831	16.0267	6.47339	-2.79667	-11.8181	5.81551
Bayangobi	1999	-15.3667	-8.63571	-5.46452	8.40667	15.0516	21.67	23.5032	21.1806	-	3.28	-5.56333	-14.6129	3.94991		Bogd	1999	-14.1343	-8.47188	-5.11694	8.36458	15.2661	21.8617	24.021	22.1016	12.6788	4.17097	-4.69958	-14.2806	5.14678
Bayangobi	2000	-	-12.6241	-3.11613	5.87667	15.0194	20.62	24.2226	18.8677	13.1133	-0.141935	-	-13.0742	6.87633		Bogd	2000	-20.5516	-13.069	-1.64839	7.7	16.4387	22.0333	24.829	20.5839	15.4033	1.83871	-9.11	-12.0839	4.36368
Bayangobi	2001	-16.6323	-11.5107	-2.57419	5.18667	14.1677	20.7833	22.9903	20.6452	13.5767	-	-7.81667	-20.8645	3.45014		Bogd	2001	-16.1419	-10.0679	-0.906452	7.77333	15.4581	22.3033	24.7194	22.5129	16.3	6.01613	-5.8	-18.9581	5.2674
Bayangobi	2002	-17.8871	-11.0179	-3.80323	3.9	14.7097	21.71	24.4323	21.6065	11.2333	1.41613	-9.45667	-	5.16755		Bogd	2002	-17.7097	-11.6179	-4.52581	6.05667	15.8548	22.85	25.8516	23.529	14.07	3.74839	-8.86333	-19.7871	4.1214
Bayangobi	2003	-17.5065	-15.7036	-5.7129	4.25	12.071	-	19.4613	17.4355	-	0.809677	-11.8	-17.0806	-1.37762		Bogd	2003	-17.0613	-12.8964	-3.70645	6.05333	13.2194	20.3767	20.8774	18.8516	14.92	2.60323	-8.78667	-14.8516	3.29993
Bayangobi	2004	-	-	-4.85161	9.18333	14.8452	19.2767	22.5645	17.9774	11.7233	1.96129	-8.95	-14.029	6.97011		Bogd	2004	-18.5032	-8.2931	-2.86452	11.0967	16.2226	21.1633	24.6323	20.2	14.2433	4.00323	-7.01333	-14.029	5.07152
Bayangobi	2005	-22.8032	-22.3607	-5.37742	6.89667	13.0806	19.3833	22.6	19.7258	12.7833	2.19677	-7.19333	-	3.53926		Bogd	2005	-20.8226	-21.4357	-2.77742	8.53333	14.5032	21.1267	24.1161	22.2161	14.8533	4.77742	-4.76667	-15.8516	3.70602
Monthly avarage		-18.4068	-13.6183	-4.43073	5.51134	14.3346	20.0033	21.8119	19.9143	13.2631	3.49436	-8.63751	-15.2889	3.16256		Monthly avarage		-17.6892	-11.8013	-2.71475	7.80597	15.1167	21.1631	23.4324	21.2154	14.2974	4.40709	-6.09476	-14.79	4.529
Monthly precipitation (mm)
Station	Year	1	2	3	4	5	6	7	8	9	10	11	12	Annual		Station	Year	1	2	3	4	5	6	7	8	9	10	11	12	Annual
Bayangobi	1985	0.4	3.8	-	2	1.2	7.1	10.3	9.8	28.5	-	-	0.2	63.3		Bogd	1985	-	0	-	4.5	1.9	4.2	10.8	5.1	16.5	-	-	-	43
Bayangobi	1986	-	-	-	-	1.2	1.2	-	10.8	10.5	-	5.5	0.8	30		Bogd	1986
Bayangobi	1987	-	-	3.1	-	-	3.8	29.6	0.2	6.7	-	4	-	47.4		Bogd	1987
Bayangobi	1988	-	2	-	0	15	8.2	4.9	3.2	2.2	0.8	4	-	40.3		Bogd	1988
Bayangobi	1989	-	7.7	1.2	7.4	-	-	-	14	13	-	-	0	43.3		Bogd	1989	0	1.4	0	13.5	-	7.3	9.1	18.6	11.6	-	-	0.2	61.7
Bayangobi	1990	1.1	-	1	-	4	-	44	-	-	-	-	-	50.1		Bogd	1990	2.6	-	5.9	9.2	17.1	5.5	53.9	16.3	-	-	0.2	-	110.7
Bayangobi	1991	-	-	4	-	-	-	-	-	5	-	-	-	9		Bogd	1991	0	0.5	2.4	-	1.3	29.2	22.8	-	7.4	-	-	3.6	67.2
Bayangobi	1992	1	-	1	-	-	-	12	-	-	-	7	-	21		Bogd	1992	3.6	0.4	1.6	-	8.3	13.1	12.9	6.9	-	7	7.1	-	60.9
Bayangobi	1993	-	-	4	5	0.2	13	15.8	34.6	-	-	5	5.2	82.8		Bogd	1993	-	1.2	-	-	5.2	9.4	26.8	60.9	-	4.8	-	-	108.3
Bayangobi	1994	-	-	0	12.4	13.4	27.8	27.8	-	-	-	-	-	81.4		Bogd	1994	-	-	3.4	0.8	4.5	-	42.1	2.6	8.3	0.3	0	0	62
Bayangobi	1995	-	-	3.2	-	-	-	6.5	-	-	-	-	3	12.7		Bogd	1995	-	0	5.5	0.2	0.1	8.3	20.1	13.1	10	-	-	2	59.3
Bayangobi	1996	0	-	1.2	-	0.1	15.3	-	10.4	0.1	1.5	-	-	28.6		Bogd	1996	-	-	0.6	2	-	15.2	33.6	4	2	0.3	-	2.4	60.1
Bayangobi	1997	-	-	-	-	8.2	27.5	32.3	7.7	5.9	-	-	-	81.6		Bogd	1997	0.3	0	-	-	0.6	23.4	26.2	14.9	1.9	0	1.1	-	68.4
Bayangobi	1998	0.4	-	4	19.6	0.3	0.7	24.8	21.3	-	-	-	-	71.1		Bogd	1998	0	1.2	3	18.4	5.5	-	-	23.3	-	8.1	-	-	59.5
Bayangobi	1999	0.3	-	-	0	33.5	5.3	23	8.8	-	0	-	0.2	71.1		Bogd	1999	0	-	-	0.7	26.4	-	33.8	2.1	19.3	-	-	2.1	84.4
Bayangobi	2000	-	1.1	0	-	4.9	7.2	10.1	25.3	0.6	7.6	-	-	56.8		Bogd	2000	2.4	0	1.5	1.6	-	6.4	14.6	38.8	-	2	0.6	-	67.9
Bayangobi	2001	0	0	0.6	1.6	0.2	19.7	1.3	7	5.5	-	2.7	8.6	47.2		Bogd	2001	0.2	0.2	0	3.4	2	14.1	3.3	8.6	0.9	10.4	0.7	5.7	49.5
Bayangobi	2002	1.6	2.4	0.8	2.3	15	3.5	6.6	2.8	3.3	0.4	1.6	-	40.3		Bogd	2002	1.1	0.3	1.9	7.6	28.1	4.4	7.8	4.6	7.7	1.2	3.5	15	83.2
Bayangobi	2003	5.5	4.5	6.1	15.5	20.7	-	23.5	23.4	-	2	2.2	-	103.4		Bogd	2003	4.2	1.3	8.6	5.9	73	19.7	18.8	19.5	-	2.8	2	0	155.8
Bayangobi	2004	-	-	-	-	0	6.6	16.2	25.5	21.2	0	0	5.5	75		Bogd	2004	1.8	0.3	3.5	-	2.3	5.6	10.1	10.5	5	0	0.7	4.9	44.7
Bayangobi	2005	0.7	12.1	0	0.2	5.8	0.7	13.4	27.1	3.2	3.2	-	-	66.4		Bogd	2005	0	2.1	0	1	0.3	0.8	9.1	15.9	1.9	8.1	-	-	39.2
Monthly avarage		1.1	4.2	2.01333	6	7.73125	9.84	17.7706	14.4937	8.13077	1.9375	3.55556	2.9375	79.7102		Monthly avarage		1.24615	0.635714	2.70714	5.29231	11.7733	11.1067	20.9294	15.6294	7.70833	3.75	1.76667	3.59	86.1351
Snow thickness (mm)
Station	Year	1	2	3	4	10	11	12								Station	Year	1	2	3	4	10	11	12
Bayangobi	1985	-	-	-	-	-	-	-								Bogd	1985	-	-	-	-	-	-	2
Bayangobi	1986	-	-	-	-	-	-	-								Bogd	1986	0.645161	-	-	-	-	-	3
Bayangobi	1987	-	-	-	-	-	-	-								Bogd	1987	-	-	-	-	-	-	-
Bayangobi	1988	-	-	-	-	-	-	-								Bogd	1988	-	-	-	-	-	-	-
Bayangobi	1989	-	-	-	-	-	-	-								Bogd	1989	-	-	-	-	-	-	0
Bayangobi	1990	-	-	-	-	-	-	-								Bogd	1990	3	-	3	8	-	-	-
Bayangobi	1991	-	-	-	-	-	-	-								Bogd	1991	-	-	0.5	-	-	-	-
Bayangobi	1992	-	-	-	-	-	-	-								Bogd	1992	2.25806	3.96296	2.8	-	2	3.52381	1.17391
Bayangobi	1993	-	-	-	-	-	2.2	-								Bogd	1993	-	0.4	-	-	0	-	-
Bayangobi	1994	-	-	-	-	-	-	-								Bogd	1994	-	-	-	-	-	-	-
Bayangobi	1995	-	-	-	-	-	-	-								Bogd	1995	-	-	-	-	-	-	-
Bayangobi	1996	-	-	-	-	-	-	-								Bogd	1996	-	-	-	-	-	-	-
Bayangobi	1997	-	-	-	-	-	-	-								Bogd	1997	-	-	-	-	-	-	-
Bayangobi	1998	-	-	-	-	-	-	-								Bogd	1998	-	-	-	-	-	-	-
Bayangobi	1999	-	-	-	-	-	-	-								Bogd	1999	-	-	-	-	-	-	-
Bayangobi	2000	-	1	-	-	3.33333	-	-								Bogd	2000	0.277778	0	-	-	0.333333	-	-
Bayangobi	2001	-	-	-	-	-	5.28571	5.54839								Bogd	2001	0.833333	-	-	-	-	0.166667	3.1
Bayangobi	2002	-	3.67857	2	1	0	1	-								Bogd	2002	2.58065	1.17647	0.625	-	-	2.92308	6.41176
Bayangobi	2003	2.6129	3.71429	2.64	3	2	2.36364	-								Bogd	2003	1.0625	0.0357143	0.75	1	0.666667	0.5	-
Bayangobi	2004	-	-	-	-	-	0	1.3								Bogd	2004	0.6875	0	1	-	-	0	0.1
Bayangobi	2005	4.70968	7.78571	5.64706	0	-	-	-								Bogd	2005	0	0.142857	0	0	2.33333	-	-
																Мэдээ гаргасан:
																	ЦУОШГ, АМСХ, МНС, Инженер					Т.Туяа
																Мэдээний баталгаажуулалт:			2020-09-29

## Sheet: (2) Missed data
Present summer (JJA) avarage temperature
-	Missed data are replaced by long-term average value
Bayangobi (S)															Bogd (N)															Bayangobi (S)
Year	1	2	3	4	5	6	7	8	9	10	11	12	Annual		Year	1	2	3	4	5	6	7	8	9	10	11	12	Annual		Year	1	2	3	4	5	6	7	8	9	10	11	12	Annual
1985	-21.8967	-20.1321	-4.4	-0.417241	14.9742	20.47	20.0645	18.5032	11.3267	5.13871	-11.1033	-23.4194	0.759048		1985	-15.4032	-13.8643	-8.19677	7.46333	15.5419	21.8033	21.4226	20.2387	12.2333	4.29355	-6.3	-14.6	3.71937		1985	-21.8967	-20.1321	-4.4	-0.417241	14.9742	20.47	20.0645	18.5032	11.3267	5.13871	-11.1033	-23.4194	0.759048
1986	-19.9033	-19.4179	-4.4	3.37	16.6968	21.62	21.6839	20.3903	14.62	1.99355	-12.61	-19.1774	2.07216		1986															1986	-19.9033	-19.4179	-4.4	3.37	16.6968	21.62	21.6839	20.3903	14.62	1.99355	-12.61	-19.1774	2.07216
1987	-18.4	-15.8741	-11.4258	8.05333	17.2677	21.3067	21.7419	20.4516	16.6	3.5	-17.9034	-15.3	2.5015		1987															1987	-18.4	-15.8741	-11.4258	8.05333	17.2677	21.3067	21.7419	20.4516	16.6	3.5	-17.9034	-15.3	2.5015
1988	-21.0067	-17.4862	-10.1677	6.41	13.8226	20.59	22.2806	22.0194	15.0433	3.12258	-9.39	-15.4161	2.48515		1988															1988	-21.0067	-17.4862	-10.1677	6.41	13.8226	20.59	22.2806	22.0194	15.0433	3.12258	-9.39	-15.4161	2.48515
1989	-14.2452	-13.3571	-3.13871	6.18333	14.7387	19.31	21.5387	20.0645	14.0767	4.80968	-7.98	-9.92903	4.3393		1989	-15.7903	-13.0286	-2.27097	8.21333	16.1226	20.7067	22.4258	20.5581	12.52	4.67742	-6.3	-11.7226	4.67595		1989	-14.2452	-13.3571	-3.13871	6.18333	14.7387	19.31	21.5387	20.0645	14.0767	4.80968	-7.98	-9.92903	4.3393
1990	-15.4774	-12.025	-1.6	4.14	14.1065	18.3567	20.6129	19.1226	13.88	7.17419	-5.47	-11.6065	4.26783		1990	-17.5581	-13.9321	-1.72258	4.88333	15.1355	19.2867	22.0742	19.8903	13.48	6.83226	-5.62	-12.2806	4.20574		1990	-15.4774	-12.025	-1.6	4.14	14.1065	18.3567	20.6129	19.1226	13.88	7.17419	-5.47	-11.6065	4.26783
1991	-18.4	-10.8074	-2.37742	4.45667	13.9742	21.1333	21.8	19.9	12.9966	5.97097	-3.76	-15.3	4.13224		1991	-15.4742	-10.8667	-2.8871	5.2	15.4258	21.3733	23.871	20.8	13.3517	5.13226	-6.3	-15.11	4.54301		1991	-18.4	-10.8074	-2.37742	4.45667	13.9742	21.1333	21.8	19.9	12.9966	5.97097	-3.76	-15.3	4.13224
1992	-19.1516	-17.8241	-8.59355	3.91667	12.1065	16.6667	17.9323	16.9258	13.43	3.5	-7.09333	-13.2323	1.54858		1992	-19.071	-17.2276	-4.97419	8.39333	16.0323	20.7233	22.571	19.771	13.9	1.47667	-8.44333	-16.229	3.07687		1992	-19.1516	-17.8241	-8.59355	3.91667	12.1065	16.6667	17.9323	16.9258	13.43	3.5	-7.09333	-13.2323	1.54858
1993	-17.7903	-3.75	1.60323	3.53077	12.4226	21.8233	21.7742	20.9258	13.3	4.95333	-9.15667	-17.7065	4.32748		1993	-19.3194	-9.60357	-1.91935	4.99333	14.3355	20.84	21.1645	18.4903	13.9	4.41	-7.97667	-14.6	3.72623		1993	-17.7903	-3.75	1.60323	3.53077	12.4226	21.8233	21.7742	20.9258	13.3	4.95333	-9.15667	-17.7065	4.32748
1994	-19.2367	-9.68571	-3.43871	6.64667	16.5968	20.4867	20.4	20.0226	10.7267	5.23871	-8.6	-15.1387	3.66819		1994	-17.1185	-12.2554	-4.21653	8.53083	14.7105	21.03	21.1754	19.9891	11.8787	3.44556	-3.38333	-15.1597	4.05222		1994	-19.2367	-9.68571	-3.43871	6.64667	16.5968	20.4867	20.4	20.0226	10.7267	5.23871	-8.6	-15.1387	3.66819
1995	-18.6452	-12.9643	-6.02903	4.1	11.6806	20.09	21.9452	21.829	13.3	2.73214	-2.95333	-15.6355	3.28747		1995	-16.6206	-10.0223	-2.11653	5.66625	12.5556	20.0808	22.4629	21.1919	14.3692	6.19395	-4.325	-16.319	4.42644		1995	-18.6452	-12.9643	-6.02903	4.1	11.6806	20.09	21.9452	21.829	13.3	2.73214	-2.95333	-15.6355	3.28747
1996	-21.9258	-15.8828	-5.92903	5.5	13.34	14.1167	21.8	20.0367	13.0333	4.06129	-8.6	-12.9387	2.21764		1996	-19.1137	-13.6272	-4.99355	6.01875	15.8306	19.3129	23.1133	20.9819	14.0933	4.39798	-7.10292	-10.9371	3.99786		1996	-21.9258	-15.8828	-5.92903	5.5	13.34	14.1167	21.8	20.0367	13.0333	4.06129	-8.6	-12.9387	2.21764
1997	-15.5567	-10.4321	0.970968	7.74	16.1258	19.7267	22.3097	20.6258	11.9067	4.6871	-8.6	-14.2167	4.60727		1997	-17.3673	-11.2812	1.91815	8.50667	16.3649	20.41	22.5685	21.644	12.7325	5.21613	-6.48958	-13.4044	5.06819		1997	-15.5567	-10.4321	0.970968	7.74	16.1258	19.7267	22.3097	20.6258	11.9067	4.6871	-8.6	-14.2167	4.60727
1998	-17.8839	-10.875	-3.15806	8.39667	14.229	20.9267	22.3677	19.929	15.4033	3.5	-8.6	-11.8333	4.36685		1998	-17.1254	-8.57723	-1.62258	9.37125	14.9754	21.275	22.8214	20.7831	16.0267	6.47339	-2.79667	-11.8181	5.81551		1998	-17.8839	-10.875	-3.15806	8.39667	14.229	20.9267	22.3677	19.929	15.4033	3.5	-8.6	-11.8333	4.36685
1999	-15.3667	-8.63571	-5.46452	8.40667	15.0516	21.67	23.5032	21.1806	13.3	3.28	-5.56333	-14.6129	4.72908		1999	-14.1343	-8.47188	-5.11694	8.36458	15.2661	21.8617	24.021	22.1016	12.6788	4.17097	-4.69958	-14.2806	5.14678		1999	-15.3667	-8.63571	-5.46452	8.40667	15.0516	21.67	23.5032	21.1806	13.3	3.28	-5.56333	-14.6129	4.72908
2000	-18.4	-12.6241	-3.11613	5.87667	15.0194	20.62	24.2226	18.8677	13.1133	-0.141935	-8.6	-13.0742	3.48027		2000	-20.5516	-13.069	-1.64839	7.7	16.4387	22.0333	24.829	20.5839	15.4033	1.83871	-9.11	-12.0839	4.36368		2000	-18.4	-12.6241	-3.11613	5.87667	15.0194	20.62	24.2226	18.8677	13.1133	-0.141935	-8.6	-13.0742	3.48027
2001	-16.6323	-11.5107	-2.57419	5.18667	14.1677	20.7833	22.9903	20.6452	13.5767	3.5	-7.81667	-20.8645	3.4543		2001	-16.1419	-10.0679	-0.906452	7.77333	15.4581	22.3033	24.7194	22.5129	16.3	6.01613	-5.8	-18.9581	5.2674		2001	-16.6323	-11.5107	-2.57419	5.18667	14.1677	20.7833	22.9903	20.6452	13.5767	3.5	-7.81667	-20.8645	3.4543
2002	-17.8871	-11.0179	-3.80323	3.9	14.7097	21.71	24.4323	21.6065	11.2333	1.41613	-9.45667	-15.3	3.46192		2002	-17.7097	-11.6179	-4.52581	6.05667	15.8548	22.85	25.8516	23.529	14.07	3.74839	-8.86333	-19.7871	4.1214		2002	-17.8871	-11.0179	-3.80323	3.9	14.7097	21.71	24.4323	21.6065	11.2333	1.41613	-9.45667	-15.3	3.46192
2003	-17.5065	-15.7036	-5.7129	4.25	12.071	20	19.4613	17.4355	13.3	0.809677	-11.8	-17.0806	1.62699		2003	-17.0613	-12.8964	-3.70645	6.05333	13.2194	20.3767	20.8774	18.8516	14.92	2.60323	-8.78667	-14.8516	3.29993		2003	-17.5065	-15.7036	-5.7129	4.25	12.071	20	19.4613	17.4355	13.3	0.809677	-11.8	-17.0806	1.62699
2004	-18.4	-13.6	-4.85161	9.18333	14.8452	19.2767	22.5645	17.9774	11.7233	1.96129	-8.95	-14.029	3.14176		2004	-18.5032	-8.2931	-2.86452	11.0967	16.2226	21.1633	24.6323	20.2	14.2433	4.00323	-7.01333	-14.029	5.07152		2004	-18.4	-13.6	-4.85161	9.18333	14.8452	19.2767	22.5645	17.9774	11.7233	1.96129	-8.95	-14.029	3.14176
2005	-22.8032	-22.3607	-5.37742	6.89667	13.0806	19.3833	22.6	19.7258	12.7833	2.19677	-7.19333	-15.3	1.96932		2005	-20.8226	-21.4357	-2.77742	8.53333	14.5032	21.1267	24.1161	22.2161	14.8533	4.77742	-4.76667	-15.8516	3.70602		2005	-22.8032	-22.3607	-5.37742	6.89667	13.0806	19.3833	22.6	19.7258	12.7833	2.19677	-7.19333	-15.3	1.96932
Mean	-18.4055	-13.6175	-4.4278	5.5108	14.3346	20.0032	21.8108	19.9136	13.2702	3.49544	-8.62858	-15.291	3.16402		Mean	-17.4937	-12.2299	-3.03044	7.3788	15.2219	21.0309	23.0399	20.7963	13.9419	4.42818	-6.33762	-14.5568	4.34912			-18.4055	-13.6175	-4.4278	5.5108	14.3346	20.0032	21.8108	19.9136	13.2702	3.49544	-8.62858	-15.291	3.16402
			JJA avarage temperature				20.5758											JJA avarage temperature				21.6224											JJA avarage temperature				20.5758

## Sheet: (3) T at Headwall
Present-day average temperature calculation of study area
	South	North	Unit	Explanation
Altitude of weather station	1611	1273	m
Headwall altitude of glacial valley	3508.3	3533.3	m
ELA of glacial valley	3388.14	3308.17	m
Average headwall altitude	3520.8		m	Avarage of both station
Mean altitude	3365.5	3265.3	m
Average mean altitude	3315.4		m	Avarage of both station
Relative height	1897.3	2260.3	m	RH between weather station and headwall altitude
Summer lapse rate	8	8	℃ km-1	Batbaatar et al., 2018
Summer dT	15.1784	18.0824	℃
SAT at the station	20.5758	21.6224	℃	SAT: Summer average temperature
SAT at the headwall	5.39743	3.53997	℃	SAT: Summer average temperature
The temperature of 5.4 ℃ (Bayangobi) is used for further calculation in site paramater of matlab code and represents present summer temperature of headwall altitude of Ih Artsan valley

## Sheet: (4) Calibrated T data
Temperature variation since LGM
1) Choosing LGM temperature anomaly
LGM temperature anomaly (°C)		Description	References
1-7		July temperature	1Tarasov et al., 1999
2.49-4.41		Annual temperature	1Tarasov et al., 1999
5		Annual temperature	2Tierney et al., 2020
4-8		Annual temperature	3Annan et al., 2013
2-10		Annual temperature	4Cane et al., 2006
2) Calculating temperature variation since LGM
- Modern temperature of study area is represented by long-term summer temperature mean at the headwall altitude of Ih Artsan.
- In order to calculate summer temperature since LGM in study area, we used Greenland JJA temperature variation since 22 ka.
5Greenland temperature data (Buizert et al., 2018)
Site:	NGRIP ice core
Latitude (℃):	75.1
Longitude (℃):	-42.32
Elevation (m)	2953.9
	Greenland	Ih Bogd (Ih Artsan headwall altitude)
Annual temperature	-28.618	-12.0144
JJA temperature	-13.2	5.39743
LGM anomaly	14.8	1-7
* See graph 1 and 2
Age		5Greenland temperature data				Calibrated JJA T, IA Anomaly -1 °C	Calibrated JJA T, IA Anomaly -2 °C	Calibrated JJA T, IA Anomaly -4 °C	Calibrated JJA T, IA Anomaly -4 °C	Calibrated JJA T, IA Anomaly -5 °C	Calibrated JJA T, IA Anomaly -5.1 °C	Calibrated JJA T, IA Anomaly -5.2 °C	Calibrated JJA T, IA Anomaly -5.3 °C	Calibrated JJA T, IA Anomaly -5.4 °C	Calibrated JJA T, IA Anomaly -5.5 °C	Calibrated JJA T, IA Anomaly -5.6 °C	Calibrated JJA T, IA Anomaly -5.7 °C	Calibrated JJA T, IA Anomaly -5.8 °C	Calibrated JJA T, IA Anomaly -5.9 °C	Calibrated JJA T, IA Anomaly -6 °C	Calibrated JJA T, IA Anomaly 7 °C	0 ℃ line (only for graph)
		ANN	DJF	MAM	JJA	-1	-2	-3	-4	-5	-5.1	-5.2	-5.3	-5.4	-5.5	-5.6	-5.7	-5.8	-5.9	-6	-7
(yr BP)	(kyr BP)	(°C)	(°C)	(°C)	(°C)	(°C)	(°C)	(°C)	(°C)	(°C)	(°C)	(°C)	(°C)	(°C)	(°C)	(°C)	(°C)	(°C)	(°C)	(°C)	(°C)
-50	-0.05	-28.825	-40.478	-30.926	-12.975	5.41264	5.42784	5.44304	5.45824	5.47345	5.47497	5.47649	5.47801	5.47953	5.48105	5.48257	5.48409	5.48561	5.48713	5.48865	5.50385	0
-30	-0.03	-30.263	-41.931	-32.204	-13.776	5.35851	5.3196	5.28068	5.24176	5.20284	5.19895	5.19506	5.19116	5.18727	5.18338	5.17949	5.1756	5.1717	5.16781	5.16392	5.125	0
-10	-0.01	-29.471	-40.636	-31.444	-13.626	5.36865	5.33987	5.31108	5.2823	5.25351	5.25064	5.24776	5.24488	5.242	5.23912	5.23624	5.23337	5.23049	5.22761	5.22473	5.19595	0
10	0.01	-28.618	-40.276	-29.775	-13.2	5.39743	5.39743	5.39743	5.39743	5.39743	5.39743	5.39743	5.39743	5.39743	5.39743	5.39743	5.39743	5.39743	5.39743	5.39743	5.39743	0
30	0.03	-30.06	-42.401	-30.853	-13.926	5.34838	5.29933	5.25027	5.20122	5.15216	5.14726	5.14235	5.13745	5.13254	5.12764	5.12273	5.11783	5.11292	5.10801	5.10311	5.05406	0
50	0.05	-31.466	-44.445	-32.902	-13.963	5.34588	5.29433	5.24277	5.19122	5.13966	5.13451	5.12935	5.1242	5.11904	5.11389	5.10873	5.10358	5.09842	5.09326	5.08811	5.03656	0
70	0.07	-31.227	-43.333	-32.265	-14.552	5.30608	5.21473	5.12338	5.03203	4.94068	4.93154	4.92241	4.91327	4.90414	4.895	4.88587	4.87673	4.8676	4.85846	4.84933	4.75797	0
90	0.09	-32.293	-43.887	-33.627	-14.875	5.28426	5.17108	5.05791	4.94473	4.83156	4.82024	4.80892	4.7976	4.78629	4.77497	4.76365	4.75233	4.74101	4.7297	4.71838	4.6052	0
110	0.11	-31.64	-44.436	-32.4	-14.735	5.29372	5.19	5.08629	4.98257	4.87885	4.86848	4.85811	4.84774	4.83737	4.82699	4.81662	4.80625	4.79588	4.78551	4.77514	4.67142	0
130	0.13	-31.024	-42.651	-33.205	-14.321	5.32169	5.24595	5.1702	5.09446	5.01872	5.01114	5.00357	4.99599	4.98842	4.98085	4.97327	4.9657	4.95812	4.95055	4.94297	4.86723	0
150	0.15	-31.058	-42.412	-32.624	-14.806	5.28892	5.18041	5.07189	4.96338	4.85487	4.84401	4.83316	4.82231	4.81146	4.80061	4.78976	4.77891	4.76806	4.7572	4.74635	4.63784	0
170	0.17	-31.372	-43.811	-32.883	-14.866	5.28487	5.1723	5.05973	4.94716	4.8346	4.82334	4.81208	4.80083	4.78957	4.77831	4.76706	4.7558	4.74454	4.73329	4.72203	4.60946	0
190	0.19	-31.595	-44.226	-33.65	-14.697	5.29629	5.19514	5.09399	4.99284	4.89169	4.88158	4.87146	4.86135	4.85123	4.84112	4.831	4.82089	4.81077	4.80066	4.79054	4.68939	0
210	0.21	-31.036	-42.923	-33.311	-14.517	5.30845	5.21946	5.13047	5.04149	4.9525	4.9436	4.9347	4.92581	4.91691	4.90801	4.89911	4.89021	4.88131	4.87241	4.86351	4.77453	0
230	0.23	-31.21	-43.094	-33.164	-15.014	5.27487	5.1523	5.02973	4.90716	4.7846	4.77234	4.76008	4.74783	4.73557	4.72331	4.71106	4.6988	4.68654	4.67429	4.66203	4.53946	0
250	0.25	-31.553	-43.133	-33.671	-15.443	5.24588	5.09433	4.94277	4.79122	4.63966	4.62451	4.60935	4.5942	4.57904	4.56389	4.54873	4.53358	4.51842	4.50326	4.48811	4.33656	0
270	0.27	-30.898	-42.963	-32.704	-14.516	5.30851	5.2196	5.13068	5.04176	4.95284	4.94395	4.93506	4.92616	4.91727	4.90838	4.89949	4.8906	4.8817	4.87281	4.86392	4.775	0
290	0.29	-30.693	-42.18	-32.382	-14.288	5.32392	5.25041	5.17689	5.10338	5.02987	5.02251	5.01516	5.00781	5.00046	4.99311	4.98576	4.97841	4.97106	4.9637	4.95635	4.88284	0
310	0.31	-31.338	-43.062	-33.452	-14.896	5.28284	5.16824	5.05365	4.93906	4.82446	4.813	4.80154	4.79008	4.77862	4.76716	4.7557	4.74424	4.73279	4.72133	4.70987	4.59527	0
330	0.33	-30.827	-42.787	-32.248	-14.854	5.28568	5.17392	5.06216	4.95041	4.83865	4.82747	4.8163	4.80512	4.79395	4.78277	4.7716	4.76042	4.74924	4.73807	4.72689	4.61514	0
350	0.35	-30.548	-42.431	-33.721	-14.069	5.33872	5.28	5.22129	5.16257	5.10385	5.09798	5.09211	5.08624	5.08037	5.07449	5.06862	5.06275	5.05688	5.05101	5.04514	4.98642	0
370	0.37	-30.505	-41.688	-32.786	-14.316	5.32203	5.24662	5.17122	5.09581	5.02041	5.01287	5.00533	4.99779	4.99024	4.9827	4.97516	4.96762	4.96008	4.95254	4.945	4.8696	0
390	0.39	-30.311	-42.664	-32.155	-14.241	5.3271	5.25676	5.18642	5.11608	5.04574	5.03871	5.03168	5.02464	5.01761	5.01058	5.00354	4.99651	4.98947	4.98244	4.97541	4.90507	0
410	0.41	-30.664	-42.422	-32.915	-14.628	5.30095	5.20446	5.10797	5.01149	4.915	4.90535	4.8957	4.88606	4.87641	4.86676	4.85711	4.84746	4.83781	4.82816	4.81851	4.72203	0
430	0.43	-29.911	-41.819	-31.944	-14.091	5.33723	5.27703	5.21683	5.15662	5.09642	5.0904	5.08438	5.07836	5.07234	5.06632	5.0603	5.05428	5.04826	5.04224	5.03622	4.97601	0
450	0.45	-30.221	-42.625	-32.151	-13.808	5.35635	5.31527	5.27419	5.23311	5.19203	5.18792	5.18381	5.1797	5.1756	5.17149	5.16738	5.16327	5.15916	5.15506	5.15095	5.10987	0
470	0.47	-30.311	-42.234	-32.242	-14.013	5.3425	5.28757	5.23264	5.1777	5.12277	5.11728	5.11179	5.10629	5.1008	5.09531	5.08981	5.08432	5.07883	5.07333	5.06784	5.01291	0
490	0.49	-30.634	-42.722	-32.404	-14.488	5.31041	5.22338	5.13635	5.04933	4.9623	4.9536	4.94489	4.93619	4.92749	4.91879	4.91008	4.90138	4.89268	4.88397	4.87527	4.78824	0
510	0.51	-29.788	-41.093	-31.967	-13.925	5.34845	5.29946	5.25047	5.20149	5.1525	5.1476	5.1427	5.13781	5.13291	5.12801	5.12311	5.11821	5.11331	5.10841	5.10351	5.05453	0
530	0.53	-29.846	-41.472	-31.342	-14.202	5.32973	5.26203	5.19433	5.12662	5.05892	5.05215	5.04538	5.03861	5.03184	5.02507	5.0183	5.01153	5.00476	4.99799	4.99122	4.92351	0
550	0.55	-29.788	-41.272	-32.272	-14.005	5.34304	5.28865	5.23426	5.17987	5.12547	5.12004	5.1146	5.10916	5.10372	5.09828	5.09284	5.0874	5.08196	5.07652	5.07108	5.01669	0
570	0.57	-30.343	-42.583	-32.82	-13.856	5.35311	5.30879	5.26446	5.22014	5.17581	5.17138	5.16695	5.16251	5.15808	5.15365	5.14922	5.14479	5.14035	5.13592	5.13149	5.08716	0
590	0.59	-30.337	-41.302	-32.525	-14.197	5.33007	5.2627	5.19534	5.12797	5.06061	5.05387	5.04714	5.0404	5.03366	5.02693	5.02019	5.01345	5.00672	4.99998	4.99324	4.92588	0
610	0.61	-30.286	-42.499	-31.982	-13.979	5.3448	5.29216	5.23953	5.18689	5.13426	5.12899	5.12373	5.11847	5.1132	5.10794	5.10268	5.09741	5.09215	5.08689	5.08162	5.02899	0
630	0.63	-30.646	-42.443	-32.915	-13.908	5.3496	5.30176	5.25392	5.20608	5.15824	5.15346	5.14868	5.14389	5.13911	5.13433	5.12954	5.12476	5.11997	5.11519	5.11041	5.06257	0
650	0.65	-30.416	-42.279	-32.318	-14.041	5.34061	5.28379	5.22696	5.17014	5.11331	5.10763	5.10195	5.09626	5.09058	5.0849	5.07922	5.07354	5.06785	5.06217	5.05649	4.99966	0
670	0.67	-30.133	-42.19	-32.2	-13.691	5.36426	5.33108	5.29791	5.26473	5.23156	5.22824	5.22492	5.2216	5.21829	5.21497	5.21165	5.20833	5.20501	5.2017	5.19838	5.1652	0
690	0.69	-30.495	-43.136	-32.629	-13.803	5.35669	5.31595	5.2752	5.23446	5.19372	5.18964	5.18557	5.18149	5.17742	5.17335	5.16927	5.1652	5.16112	5.15705	5.15297	5.11223	0
710	0.71	-30.417	-41.242	-33.204	-14.31	5.32243	5.24743	5.17243	5.09743	5.02243	5.01493	5.00743	4.99993	4.99243	4.98493	4.97743	4.96993	4.96243	4.95493	4.94743	4.87243	0
730	0.73	-29.893	-41.031	-31.672	-14.058	5.33946	5.28149	5.22351	5.16554	5.10757	5.10177	5.09597	5.09018	5.08438	5.07858	5.07279	5.06699	5.06119	5.05539	5.0496	4.99162	0
750	0.75	-30.316	-42.141	-32.436	-13.835	5.35453	5.31162	5.26872	5.22581	5.18291	5.17862	5.17433	5.17004	5.16574	5.16145	5.15716	5.15287	5.14858	5.14429	5.14	5.0971	0
770	0.77	-30.233	-42.053	-32.566	-14.103	5.33642	5.27541	5.21439	5.15338	5.09237	5.08626	5.08016	5.07406	5.06796	5.06186	5.05576	5.04966	5.04356	5.03745	5.03135	4.97034	0
790	0.79	-30.203	-42.383	-32.405	-13.909	5.34953	5.30162	5.25372	5.20581	5.15791	5.15312	5.14833	5.14354	5.13874	5.13395	5.12916	5.12437	5.11958	5.11479	5.11	5.0621	0
810	0.81	-29.447	-40.928	-32.017	-13.676	5.36527	5.33311	5.30095	5.26879	5.23662	5.23341	5.23019	5.22697	5.22376	5.22054	5.21733	5.21411	5.21089	5.20768	5.20446	5.1723	0
830	0.83	-29.394	-41.417	-31.476	-13.2	5.39743	5.39743	5.39743	5.39743	5.39743	5.39743	5.39743	5.39743	5.39743	5.39743	5.39743	5.39743	5.39743	5.39743	5.39743	5.39743	0
850	0.85	-30.272	-41.907	-32.397	-14.238	5.3273	5.25716	5.18703	5.11689	5.04676	5.03974	5.03273	5.02572	5.0187	5.01169	5.00468	4.99766	4.99065	4.98364	4.97662	4.90649	0
870	0.87	-29.936	-41.662	-32.488	-13.756	5.35987	5.3223	5.28473	5.24716	5.2096	5.20584	5.20208	5.19833	5.19457	5.19081	5.18706	5.1833	5.17954	5.17579	5.17203	5.13446	0
890	0.89	-29.755	-40.368	-32.11	-13.882	5.35135	5.30527	5.25919	5.21311	5.16703	5.16242	5.15781	5.1532	5.1486	5.14399	5.13938	5.13477	5.13016	5.12556	5.12095	5.07487	0
910	0.91	-30.442	-41.588	-32.941	-14.488	5.31041	5.22338	5.13635	5.04933	4.9623	4.9536	4.94489	4.93619	4.92749	4.91879	4.91008	4.90138	4.89268	4.88397	4.87527	4.78824	0		5.5℃ of LGM summer temperature anomaly is selected for further calculation
930	0.93	-30.478	-42.236	-32.931	-14.062	5.33919	5.28095	5.2227	5.16446	5.10622	5.10039	5.09457	5.08874	5.08292	5.0771	5.07127	5.06545	5.05962	5.0538	5.04797	4.98973	0
950	0.95	-30.704	-42.649	-33.144	-14.216	5.32879	5.26014	5.19149	5.12284	5.05419	5.04733	5.04046	5.0336	5.02673	5.01987	5.013	5.00614	4.99927	4.99241	4.98554	4.91689	0
970	0.97	-29.682	-40.81	-31.939	-13.689	5.36439	5.33135	5.29831	5.26527	5.23223	5.22893	5.22562	5.22232	5.21901	5.21571	5.21241	5.2091	5.2058	5.20249	5.19919	5.16615	0
990	0.99	-29.772	-41.146	-32.363	-13.864	5.35257	5.3077	5.26284	5.21797	5.17311	5.16862	5.16414	5.15965	5.15516	5.15068	5.14619	5.1417	5.13722	5.13273	5.12824	5.08338	0
1010	1.01	-29.228	-40.308	-31.376	-13.502	5.37703	5.35662	5.33622	5.31581	5.29541	5.29337	5.29133	5.28929	5.28724	5.2852	5.28316	5.28112	5.27908	5.27704	5.275	5.2546	0
1030	1.03	-29.738	-41.129	-31.665	-13.808	5.35635	5.31527	5.27419	5.23311	5.19203	5.18792	5.18381	5.1797	5.1756	5.17149	5.16738	5.16327	5.15916	5.15506	5.15095	5.10987	0
1050	1.05	-29.912	-41.56	-32.59	-13.713	5.36277	5.32811	5.29345	5.25879	5.22412	5.22066	5.21719	5.21372	5.21026	5.20679	5.20333	5.19986	5.19639	5.19293	5.18946	5.1548	0
1070	1.07	-30.146	-42.249	-32.377	-14.021	5.34196	5.28649	5.23101	5.17554	5.12007	5.11452	5.10897	5.10343	5.09788	5.09233	5.08679	5.08124	5.07569	5.07014	5.0646	5.00912	0
1090	1.09	-30.296	-42.863	-32.295	-13.976	5.345	5.29257	5.24014	5.1877	5.13527	5.13003	5.12479	5.11954	5.1143	5.10906	5.10381	5.09857	5.09333	5.08808	5.08284	5.03041	0
1110	1.11	-31.244	-43.845	-33.362	-14.401	5.31629	5.23514	5.15399	5.07284	4.99169	4.98358	4.97546	4.96735	4.95923	4.95112	4.943	4.93489	4.92677	4.91866	4.91054	4.82939	0
1130	1.13	-30.956	-42.953	-33.167	-14.115	5.33561	5.27379	5.21196	5.15014	5.08831	5.08213	5.07595	5.06976	5.06358	5.0574	5.05122	5.04504	5.03885	5.03267	5.02649	4.96466	0
1150	1.15	-30.577	-41.984	-33.178	-14.231	5.32777	5.25811	5.18845	5.11879	5.04912	5.04216	5.03519	5.02822	5.02126	5.01429	5.00733	5.00036	4.99339	4.98643	4.97946	4.9098	0
1170	1.17	-30.112	-41.38	-32.49	-13.826	5.35514	5.31284	5.27054	5.22824	5.18595	5.18172	5.17749	5.17326	5.16903	5.1648	5.16057	5.15634	5.15211	5.14788	5.14365	5.10135	0
1190	1.19	-29.757	-41.792	-32.085	-13.547	5.37399	5.35054	5.3271	5.30365	5.2802	5.27786	5.27551	5.27317	5.27083	5.26848	5.26614	5.26379	5.26145	5.2591	5.25676	5.23331	0
1210	1.21	-29.208	-40.296	-31.85	-13.444	5.38095	5.36446	5.34797	5.33149	5.315	5.31335	5.3117	5.31006	5.30841	5.30676	5.30511	5.30346	5.30181	5.30016	5.29851	5.28203	0
1230	1.23	-28.485	-39.114	-30.443	-13.207	5.39696	5.39649	5.39601	5.39554	5.39507	5.39502	5.39497	5.39493	5.39488	5.39483	5.39479	5.39474	5.39469	5.39464	5.3946	5.39412	0
1250	1.25	-27.389	-37.262	-29.183	-12.507	5.44426	5.49108	5.53791	5.58473	5.63156	5.63624	5.64092	5.6456	5.65029	5.65497	5.65965	5.66433	5.66901	5.6737	5.67838	5.7252	0
1270	1.27	-28.399	-39.01	-30.943	-13.037	5.40845	5.41946	5.43047	5.44149	5.4525	5.4536	5.4547	5.45581	5.45691	5.45801	5.45911	5.46021	5.46131	5.46241	5.46351	5.47453	0
1290	1.29	-28.093	-39.53	-29.814	-12.725	5.42953	5.46162	5.49372	5.52581	5.55791	5.56112	5.56433	5.56754	5.57074	5.57395	5.57716	5.58037	5.58358	5.58679	5.59	5.6221	0
1310	1.31	-28.301	-39.212	-30.451	-12.815	5.42345	5.44946	5.47547	5.50149	5.5275	5.5301	5.5327	5.53531	5.53791	5.54051	5.54311	5.54571	5.54831	5.55091	5.55351	5.57953	0
1330	1.33	-29.671	-41.386	-31.946	-13.816	5.35581	5.31419	5.27257	5.23095	5.18933	5.18516	5.181	5.17684	5.17268	5.16851	5.16435	5.16019	5.15603	5.15187	5.1477	5.10608	0
1350	1.35	-30.745	-43.228	-33.818	-13.868	5.3523	5.30716	5.26203	5.21689	5.17176	5.16724	5.16273	5.15822	5.1537	5.14919	5.14468	5.14016	5.13565	5.13114	5.12662	5.08149	0
1370	1.37	-30.529	-42.419	-33.185	-13.664	5.36608	5.33473	5.30338	5.27203	5.24068	5.23754	5.23441	5.23127	5.22814	5.225	5.22187	5.21873	5.2156	5.21246	5.20933	5.17797	0
1390	1.39	-30.283	-41.48	-32.948	-13.965	5.34574	5.29406	5.24237	5.19068	5.13899	5.13382	5.12865	5.12348	5.11831	5.11314	5.10797	5.10281	5.09764	5.09247	5.0873	5.03561	0
1410	1.41	-30.48	-41.187	-32.943	-14.392	5.31689	5.23635	5.15581	5.07527	4.99473	4.98668	4.97862	4.97057	4.96251	4.95446	4.94641	4.93835	4.9303	4.92224	4.91419	4.83365	0
1430	1.43	-29.806	-40.436	-32.449	-13.75	5.36027	5.32311	5.28595	5.24879	5.21162	5.20791	5.20419	5.20047	5.19676	5.19304	5.18933	5.18561	5.18189	5.17818	5.17446	5.1373	0
1450	1.45	-30.464	-41.828	-33.305	-14.353	5.31953	5.24162	5.16372	5.08581	5.00791	5.00012	4.99233	4.98454	4.97674	4.96895	4.96116	4.95337	4.94558	4.93779	4.93	4.8521	0
1470	1.47	-30.406	-42.587	-32.525	-13.682	5.36487	5.3323	5.29973	5.26716	5.2346	5.23134	5.22808	5.22483	5.22157	5.21831	5.21506	5.2118	5.20854	5.20529	5.20203	5.16946	0
1490	1.49	-29.62	-40.306	-32.295	-13.563	5.37291	5.34838	5.32385	5.29933	5.2748	5.27235	5.26989	5.26744	5.26499	5.26254	5.26008	5.25763	5.25518	5.25272	5.25027	5.22574	0
1510	1.51	-29.062	-40.216	-31.142	-13.533	5.37493	5.35243	5.32993	5.30743	5.28493	5.28268	5.28043	5.27818	5.27593	5.27368	5.27143	5.26918	5.26693	5.26468	5.26243	5.23993	0
1530	1.53	-28.97	-39.954	-32.79	-12.962	5.41351	5.4296	5.44568	5.46176	5.47784	5.47945	5.48106	5.48266	5.48427	5.48588	5.48749	5.4891	5.4907	5.49231	5.49392	5.51	0
1550	1.55	-28.887	-39.871	-30.822	-13.359	5.38669	5.37595	5.3652	5.35446	5.34372	5.34264	5.34157	5.34049	5.33942	5.33835	5.33727	5.3362	5.33512	5.33405	5.33297	5.32223	0
1570	1.57	-29.126	-40.423	-31.386	-13.381	5.3852	5.37297	5.36074	5.34851	5.33629	5.33506	5.33384	5.33262	5.33139	5.33017	5.32895	5.32772	5.3265	5.32528	5.32406	5.31183	0
1590	1.59	-28.768	-39.678	-30.974	-13.313	5.3898	5.38216	5.37453	5.36689	5.35926	5.35849	5.35773	5.35697	5.3562	5.35544	5.35468	5.35391	5.35315	5.35239	5.35162	5.34399	0
1610	1.61	-29.014	-40.198	-30.769	-13.48	5.37851	5.3596	5.34068	5.32176	5.30284	5.30095	5.29906	5.29716	5.29527	5.29338	5.29149	5.2896	5.2877	5.28581	5.28392	5.265	0
1630	1.63	-29.616	-40.933	-32.104	-13.625	5.36872	5.34	5.31129	5.28257	5.25385	5.25098	5.24811	5.24524	5.24237	5.23949	5.23662	5.23375	5.23088	5.22801	5.22514	5.19642	0
1650	1.65	-29.923	-42.03	-31.914	-13.862	5.3527	5.30797	5.26324	5.21851	5.17379	5.16931	5.16484	5.16037	5.15589	5.15142	5.14695	5.14247	5.138	5.13353	5.12906	5.08433	0
1670	1.67	-29.552	-40.126	-31.914	-14.266	5.32541	5.25338	5.18135	5.10933	5.0373	5.0301	5.02289	5.01569	5.00849	5.00129	4.99408	4.98688	4.97968	4.97247	4.96527	4.89324	0
1690	1.69	-29.24	-40.947	-31.533	-13.263	5.39318	5.38892	5.38466	5.38041	5.37615	5.37572	5.3753	5.37487	5.37445	5.37402	5.3736	5.37317	5.37274	5.37232	5.37189	5.36764	0
1710	1.71	-29.725	-40.708	-32.479	-13.936	5.3477	5.29797	5.24824	5.19851	5.14879	5.14381	5.13884	5.13387	5.12889	5.12392	5.11895	5.11397	5.109	5.10403	5.09906	5.04933	0
1730	1.73	-30.629	-42.37	-32.698	-14.165	5.33223	5.26703	5.20183	5.13662	5.07142	5.0649	5.05838	5.05186	5.04534	5.03882	5.0323	5.02578	5.01926	5.01274	5.00622	4.94101	0
1750	1.75	-30.949	-43.551	-32.741	-14.296	5.32338	5.24933	5.17527	5.10122	5.02716	5.01976	5.01235	5.00495	4.99754	4.99014	4.98273	4.97533	4.96792	4.96051	4.95311	4.87906	0
1770	1.77	-31.29	-44.225	-32.95	-14.097	5.33683	5.27622	5.21561	5.155	5.09439	5.08833	5.08227	5.07621	5.07015	5.06409	5.05803	5.05197	5.04591	5.03985	5.03379	4.97318	0
1790	1.79	-30.41	-41.873	-32.588	-14.244	5.32689	5.25635	5.18581	5.11527	5.04473	5.03768	5.03062	5.02357	5.01651	5.00946	5.00241	4.99535	4.9883	4.98124	4.97419	4.90365	0
1810	1.81	-30.059	-41.432	-32.751	-13.596	5.37068	5.34392	5.31716	5.29041	5.26365	5.26097	5.2583	5.25562	5.25295	5.25027	5.2476	5.24492	5.24224	5.23957	5.23689	5.21014	0
1830	1.83	-29.727	-41.457	-32.093	-13.771	5.35885	5.32027	5.28169	5.24311	5.20453	5.20067	5.19681	5.19295	5.1891	5.18524	5.18138	5.17752	5.17366	5.16981	5.16595	5.12737	0
1850	1.85	-29.691	-40.397	-32.498	-14.089	5.33737	5.2773	5.21723	5.15716	5.0971	5.09109	5.08508	5.07908	5.07307	5.06706	5.06106	5.05505	5.04904	5.04304	5.03703	4.97696	0
1870	1.87	-29.523	-41.175	-31.21	-13.863	5.35264	5.30784	5.26304	5.21824	5.17345	5.16897	5.16449	5.16001	5.15553	5.15105	5.14657	5.14209	5.13761	5.13313	5.12865	5.08385	0
1890	1.89	-29.11	-40.535	-30.878	-13.11	5.40351	5.4096	5.41568	5.42176	5.42784	5.42845	5.42906	5.42966	5.43027	5.43088	5.43149	5.4321	5.4327	5.43331	5.43392	5.44	0
1910	1.91	-29.406	-41.152	-31.55	-13.247	5.39426	5.39108	5.38791	5.38473	5.38156	5.38124	5.38092	5.3806	5.38029	5.37997	5.37965	5.37933	5.37901	5.3787	5.37838	5.3752	0
1930	1.93	-29.337	-39.586	-31.706	-13.434	5.38162	5.36581	5.35	5.33419	5.31838	5.3168	5.31522	5.31364	5.31206	5.31047	5.30889	5.30731	5.30573	5.30415	5.30257	5.28676	0
1950	1.95	-28.406	-39.638	-31.132	-13.014	5.41	5.42257	5.43514	5.4477	5.46027	5.46153	5.46279	5.46404	5.4653	5.46656	5.46781	5.46907	5.47033	5.47158	5.47284	5.48541	0
1970	1.97	-29.476	-40.315	-32.039	-13.871	5.3521	5.30676	5.26142	5.21608	5.17074	5.16621	5.16168	5.15714	5.15261	5.14808	5.14354	5.13901	5.13447	5.12994	5.12541	5.08007	0
1990	1.99	-29.256	-40.176	-32.205	-13.504	5.37689	5.35635	5.33581	5.31527	5.29473	5.29268	5.29062	5.28857	5.28651	5.28446	5.28241	5.28035	5.2783	5.27624	5.27419	5.25365	0
2010	2.01	-29.704	-40.345	-32.464	-13.613	5.36953	5.34162	5.31372	5.28581	5.25791	5.25512	5.25233	5.24954	5.24674	5.24395	5.24116	5.23837	5.23558	5.23279	5.23	5.2021	0
2030	2.03	-29.565	-41.058	-32.34	-13.453	5.38034	5.36324	5.34615	5.32906	5.31196	5.31025	5.30854	5.30683	5.30512	5.30341	5.3017	5.29999	5.29829	5.29658	5.29487	5.27777	0
2050	2.05	-28.439	-39.773	-31.269	-12.526	5.44297	5.48851	5.53406	5.5796	5.62514	5.62969	5.63424	5.6388	5.64335	5.64791	5.65246	5.65701	5.66157	5.66612	5.67068	5.71622	0
2070	2.07	-28.746	-39.916	-31.231	-12.909	5.4171	5.43676	5.45642	5.47608	5.49574	5.49771	5.49968	5.50164	5.50361	5.50558	5.50754	5.50951	5.51147	5.51344	5.51541	5.53507	0
2090	2.09	-29.388	-40.488	-31.804	-13.453	5.38034	5.36324	5.34615	5.32906	5.31196	5.31025	5.30854	5.30683	5.30512	5.30341	5.3017	5.29999	5.29829	5.29658	5.29487	5.27777	0
2110	2.11	-29.886	-41.748	-32.57	-13.703	5.36345	5.32946	5.29547	5.26149	5.2275	5.2241	5.2207	5.21731	5.21391	5.21051	5.20711	5.20371	5.20031	5.19691	5.19351	5.15953	0
2130	2.13	-29.911	-41.15	-32.145	-14.412	5.31554	5.23365	5.15176	5.06987	4.98797	4.97979	4.9716	4.96341	4.95522	4.94703	4.93884	4.93065	4.92246	4.91427	4.90608	4.82419	0
2150	2.15	-30.243	-41.658	-32.737	-13.993	5.34385	5.29027	5.23669	5.18311	5.12953	5.12417	5.11881	5.11345	5.1081	5.10274	5.09738	5.09202	5.08666	5.08131	5.07595	5.02237	0
2170	2.17	-30.203	-42.617	-32.586	-13.364	5.38635	5.37527	5.36419	5.35311	5.34203	5.34092	5.33981	5.3387	5.3376	5.33649	5.33538	5.33427	5.33316	5.33206	5.33095	5.31987	0
2190	2.19	-29.428	-41.212	-31.885	-13.492	5.3777	5.35797	5.33824	5.31851	5.29879	5.29681	5.29484	5.29287	5.29089	5.28892	5.28695	5.28497	5.283	5.28103	5.27906	5.25933	0
2210	2.21	-29.499	-40.291	-32.582	-13.609	5.3698	5.34216	5.31453	5.28689	5.25926	5.25649	5.25373	5.25097	5.2482	5.24544	5.24268	5.23991	5.23715	5.23439	5.23162	5.20399	0
2230	2.23	-28.855	-39.165	-31.321	-13.085	5.4052	5.41297	5.42074	5.42851	5.43629	5.43706	5.43784	5.43862	5.43939	5.44017	5.44095	5.44172	5.4425	5.44328	5.44406	5.45183	0
2250	2.25	-28.92	-41.068	-31.178	-12.855	5.42074	5.44406	5.46737	5.49068	5.51399	5.51632	5.51865	5.52098	5.52331	5.52564	5.52797	5.53031	5.53264	5.53497	5.5373	5.56061	0
2270	2.27	-28.987	-41.006	-30.534	-12.677	5.43277	5.46811	5.50345	5.53879	5.57412	5.57766	5.58119	5.58472	5.58826	5.59179	5.59533	5.59886	5.60239	5.60593	5.60946	5.6448	0
2290	2.29	-28.803	-39.344	-31.762	-12.734	5.42892	5.46041	5.49189	5.52338	5.55487	5.55801	5.56116	5.56431	5.56746	5.57061	5.57376	5.57691	5.58006	5.5832	5.58635	5.61784	0
2310	2.31	-29.363	-40.726	-31.682	-13.241	5.39466	5.39189	5.38912	5.38635	5.38358	5.38331	5.38303	5.38275	5.38247	5.3822	5.38192	5.38164	5.38137	5.38109	5.38081	5.37804	0
2330	2.33	-30.052	-41.869	-32.145	-13.677	5.3652	5.33297	5.30074	5.26851	5.23629	5.23306	5.22984	5.22662	5.22339	5.22017	5.21695	5.21372	5.2105	5.20728	5.20406	5.17183	0
2350	2.35	-30.267	-42.577	-32.777	-13.703	5.36345	5.32946	5.29547	5.26149	5.2275	5.2241	5.2207	5.21731	5.21391	5.21051	5.20711	5.20371	5.20031	5.19691	5.19351	5.15953	0
2370	2.37	-29.783	-41.778	-32.382	-13.589	5.37115	5.34487	5.31858	5.2923	5.26601	5.26339	5.26076	5.25813	5.2555	5.25287	5.25024	5.24762	5.24499	5.24236	5.23973	5.21345	0
2390	2.39	-29.692	-41.337	-32.377	-13.228	5.39554	5.39365	5.39176	5.38987	5.38797	5.38779	5.3876	5.38741	5.38722	5.38703	5.38684	5.38665	5.38646	5.38627	5.38608	5.38419	0
2410	2.41	-30.068	-42.09	-32.74	-13.575	5.3721	5.34676	5.32142	5.29608	5.27074	5.26821	5.26568	5.26314	5.26061	5.25808	5.25554	5.25301	5.25047	5.24794	5.24541	5.22007	0
2430	2.43	-30.531	-42.373	-32.489	-14.048	5.34014	5.28284	5.22554	5.16824	5.11095	5.10522	5.09949	5.09376	5.08803	5.0823	5.07657	5.07084	5.06511	5.05938	5.05365	4.99635	0
2450	2.45	-30.681	-43.085	-32.714	-13.87	5.35216	5.30689	5.26162	5.21635	5.17108	5.16656	5.16203	5.1575	5.15297	5.14845	5.14392	5.13939	5.13487	5.13034	5.12581	5.08054	0
2470	2.47	-30.517	-42.581	-32.954	-13.739	5.36101	5.3246	5.28818	5.25176	5.21534	5.2117	5.20806	5.20441	5.20077	5.19713	5.19349	5.18985	5.1862	5.18256	5.17892	5.1425	0
2490	2.49	-29.973	-41.366	-32.692	-13.758	5.35973	5.32203	5.28433	5.24662	5.20892	5.20515	5.20138	5.19761	5.19384	5.19007	5.1863	5.18253	5.17876	5.17499	5.17122	5.13351	0
2510	2.51	-29.107	-40.56	-31.217	-13.16	5.40014	5.40284	5.40554	5.40824	5.41095	5.41122	5.41149	5.41176	5.41203	5.4123	5.41257	5.41284	5.41311	5.41338	5.41365	5.41635	0
2530	2.53	-28.898	-40.004	-32.207	-13.037	5.40845	5.41946	5.43047	5.44149	5.4525	5.4536	5.4547	5.45581	5.45691	5.45801	5.45911	5.46021	5.46131	5.46241	5.46351	5.47453	0
2550	2.55	-28.477	-39.841	-31.019	-12.923	5.41615	5.43487	5.45358	5.4723	5.49101	5.49289	5.49476	5.49663	5.4985	5.50037	5.50224	5.50412	5.50599	5.50786	5.50973	5.52845	0
2570	2.57	-29.38	-40.871	-32.341	-13.116	5.40311	5.40879	5.41446	5.42014	5.42581	5.42638	5.42695	5.42751	5.42808	5.42865	5.42922	5.42979	5.43035	5.43092	5.43149	5.43716	0
2590	2.59	-29.395	-40.564	-31.342	-13.336	5.38824	5.37906	5.36987	5.36068	5.35149	5.35057	5.34965	5.34873	5.34781	5.34689	5.34597	5.34506	5.34414	5.34322	5.3423	5.33311	0
2610	2.61	-28.986	-40.667	-30.873	-13.018	5.40973	5.42203	5.43433	5.44662	5.45892	5.46015	5.46138	5.46261	5.46384	5.46507	5.4663	5.46753	5.46876	5.46999	5.47122	5.48351	0
2630	2.63	-29.103	-39.907	-31.908	-13.225	5.39574	5.39406	5.39237	5.39068	5.38899	5.38882	5.38865	5.38848	5.38831	5.38814	5.38797	5.38781	5.38764	5.38747	5.3873	5.38561	0
2650	2.65	-29.476	-40.882	-32.376	-13.035	5.40858	5.41973	5.43088	5.44203	5.45318	5.45429	5.45541	5.45652	5.45764	5.45875	5.45987	5.46098	5.4621	5.46321	5.46433	5.47547	0
2670	2.67	-30.191	-41.222	-32.497	-14.011	5.34264	5.28784	5.23304	5.17824	5.12345	5.11797	5.11249	5.10701	5.10153	5.09605	5.09057	5.08509	5.07961	5.07413	5.06865	5.01385	0
2690	2.69	-30.81	-42.808	-33.099	-13.955	5.34642	5.29541	5.24439	5.19338	5.14237	5.13726	5.13216	5.12706	5.12196	5.11686	5.11176	5.10666	5.10156	5.09645	5.09135	5.04034	0
2710	2.71	-29.533	-40.935	-31.656	-13.575	5.3721	5.34676	5.32142	5.29608	5.27074	5.26821	5.26568	5.26314	5.26061	5.25808	5.25554	5.25301	5.25047	5.24794	5.24541	5.22007	0
2730	2.73	-28.965	-40.34	-31.582	-12.77	5.42649	5.45554	5.4846	5.51365	5.5427	5.54561	5.54851	5.55142	5.55433	5.55723	5.56014	5.56304	5.56595	5.56885	5.57176	5.60081	0
2750	2.75	-29.838	-41.766	-32.174	-13.299	5.39074	5.38406	5.37737	5.37068	5.36399	5.36332	5.36265	5.36198	5.36131	5.36064	5.35997	5.35931	5.35864	5.35797	5.3573	5.35061	0
2770	2.77	-29.518	-39.925	-32.103	-13.829	5.35493	5.31243	5.26993	5.22743	5.18493	5.18068	5.17643	5.17218	5.16793	5.16368	5.15943	5.15518	5.15093	5.14668	5.14243	5.09993	0
2790	2.79	-29.489	-40.522	-31.972	-13.132	5.40203	5.40662	5.41122	5.41581	5.42041	5.42087	5.42133	5.42179	5.42224	5.4227	5.42316	5.42362	5.42408	5.42454	5.425	5.4296	0
2810	2.81	-29.771	-41.04	-32.289	-13.387	5.3848	5.37216	5.35953	5.34689	5.33426	5.33299	5.33173	5.33047	5.3292	5.32794	5.32668	5.32541	5.32415	5.32289	5.32162	5.30899	0
2830	2.83	-29.709	-41.181	-32.493	-13.395	5.38426	5.37108	5.35791	5.34473	5.33156	5.33024	5.32892	5.3276	5.32629	5.32497	5.32365	5.32233	5.32101	5.3197	5.31838	5.3052	0
2850	2.85	-29.867	-41.744	-31.888	-13.252	5.39392	5.39041	5.38689	5.38338	5.37987	5.37951	5.37916	5.37881	5.37846	5.37811	5.37776	5.37741	5.37706	5.3767	5.37635	5.37284	0
2870	2.87	-30.086	-41.831	-32.746	-13.302	5.39054	5.38365	5.37676	5.36987	5.36297	5.36229	5.3616	5.36091	5.36022	5.35953	5.35884	5.35815	5.35746	5.35677	5.35608	5.34919	0
2890	2.89	-29.391	-42.028	-32.369	-12.793	5.42493	5.45243	5.47993	5.50743	5.53493	5.53768	5.54043	5.54318	5.54593	5.54868	5.55143	5.55418	5.55693	5.55968	5.56243	5.58993	0
2910	2.91	-28.983	-40.098	-31.72	-12.992	5.41149	5.42554	5.4396	5.45365	5.4677	5.46911	5.47051	5.47192	5.47333	5.47473	5.47614	5.47754	5.47895	5.48035	5.48176	5.49581	0
2930	2.93	-28.94	-39.238	-32.25	-13.17	5.39946	5.40149	5.40351	5.40554	5.40757	5.40777	5.40797	5.40818	5.40838	5.40858	5.40879	5.40899	5.40919	5.40939	5.4096	5.41162	0
2950	2.95	-29.081	-40.535	-31.524	-13.099	5.40426	5.41108	5.41791	5.42473	5.43156	5.43224	5.43292	5.4336	5.43429	5.43497	5.43565	5.43633	5.43701	5.4377	5.43838	5.4452	0
2970	2.97	-27.929	-39.081	-30.478	-12.884	5.41879	5.44014	5.46149	5.48284	5.50419	5.50633	5.50846	5.5106	5.51273	5.51487	5.517	5.51914	5.52127	5.52341	5.52554	5.54689	0
2990	2.99	-29.163	-39.83	-31.944	-13.219	5.39615	5.39487	5.39358	5.3923	5.39101	5.39089	5.39076	5.39063	5.3905	5.39037	5.39024	5.39012	5.38999	5.38986	5.38973	5.38845	0
3010	3.01	-29.886	-41.655	-32.254	-13.512	5.37635	5.35527	5.33419	5.31311	5.29203	5.28992	5.28781	5.2857	5.2836	5.28149	5.27938	5.27727	5.27516	5.27306	5.27095	5.24987	0
3030	3.03	-29.903	-41.689	-32.655	-13.336	5.38824	5.37906	5.36987	5.36068	5.35149	5.35057	5.34965	5.34873	5.34781	5.34689	5.34597	5.34506	5.34414	5.34322	5.3423	5.33311	0
3050	3.05	-29.48	-40.972	-31.472	-13.174	5.39919	5.40095	5.4027	5.40446	5.40622	5.40639	5.40657	5.40674	5.40692	5.4071	5.40727	5.40745	5.40762	5.4078	5.40797	5.40973	0
3070	3.07	-28.712	-40.137	-31.453	-12.479	5.44615	5.49487	5.54358	5.5923	5.64101	5.64589	5.65076	5.65563	5.6605	5.66537	5.67024	5.67512	5.67999	5.68486	5.68973	5.73845	0
3090	3.09	-28.644	-39.318	-31.808	-12.71	5.43054	5.46365	5.49676	5.52987	5.56297	5.56629	5.5696	5.57291	5.57622	5.57953	5.58284	5.58615	5.58946	5.59277	5.59608	5.62919	0
3110	3.11	-29.256	-41.148	-31.015	-13.127	5.40237	5.4073	5.41223	5.41716	5.4221	5.42259	5.42308	5.42358	5.42407	5.42456	5.42506	5.42555	5.42604	5.42654	5.42703	5.43196	0
3130	3.13	-29.018	-40.196	-31.481	-13.02	5.4096	5.42176	5.43392	5.44608	5.45824	5.45946	5.46068	5.46189	5.46311	5.46433	5.46554	5.46676	5.46797	5.46919	5.47041	5.48257	0
3150	3.15	-28.637	-39.308	-31.925	-12.831	5.42237	5.4473	5.47223	5.49716	5.5221	5.52459	5.52708	5.52958	5.53207	5.53456	5.53706	5.53955	5.54204	5.54454	5.54703	5.57196	0
3170	3.17	-29.103	-40.903	-31.492	-13.094	5.4046	5.41176	5.41892	5.42608	5.43324	5.43396	5.43468	5.43539	5.43611	5.43683	5.43754	5.43826	5.43897	5.43969	5.44041	5.44757	0
3190	3.19	-29.684	-42.406	-32.12	-13.08	5.40554	5.41365	5.42176	5.42987	5.43797	5.43879	5.4396	5.44041	5.44122	5.44203	5.44284	5.44365	5.44446	5.44527	5.44608	5.45419	0
3210	3.21	-29.57	-41.477	-32.386	-13.537	5.37466	5.35189	5.32912	5.30635	5.28358	5.28131	5.27903	5.27675	5.27447	5.2722	5.26992	5.26764	5.26537	5.26309	5.26081	5.23804	0
3230	3.23	-29.132	-41.489	-32.244	-12.647	5.4348	5.47216	5.50953	5.54689	5.58426	5.58799	5.59173	5.59547	5.5992	5.60294	5.60668	5.61041	5.61415	5.61789	5.62162	5.65899	0
3250	3.25	-28.786	-40.427	-31.031	-12.91	5.41703	5.43662	5.45622	5.47581	5.49541	5.49737	5.49933	5.50129	5.50324	5.5052	5.50716	5.50912	5.51108	5.51304	5.515	5.5346	0
3270	3.27	-28.457	-38.91	-31.568	-12.629	5.43601	5.4746	5.51318	5.55176	5.59034	5.5942	5.59806	5.60191	5.60577	5.60963	5.61349	5.61735	5.6212	5.62506	5.62892	5.6675	0
3290	3.29	-28.153	-39.842	-30.573	-12.25	5.46162	5.52581	5.59	5.65419	5.71838	5.7248	5.73122	5.73764	5.74406	5.75047	5.75689	5.76331	5.76973	5.77615	5.78257	5.84676	0
3310	3.31	-28.348	-38.788	-31.03	-12.575	5.43966	5.48189	5.52412	5.56635	5.60858	5.61281	5.61703	5.62125	5.62547	5.6297	5.63392	5.63814	5.64237	5.64659	5.65081	5.69304	0
3330	3.33	-28.233	-39.857	-30.859	-12.309	5.45764	5.51784	5.57804	5.63824	5.69845	5.70447	5.71049	5.71651	5.72253	5.72855	5.73457	5.74059	5.74661	5.75263	5.75865	5.81885	0
3350	3.35	-28.4	-39.191	-30.672	-12.491	5.44534	5.49324	5.54115	5.58906	5.63696	5.64175	5.64654	5.65133	5.65612	5.66091	5.6657	5.67049	5.67529	5.68008	5.68487	5.73277	0
3370	3.37	-28.871	-40.736	-31.369	-12.544	5.44176	5.48608	5.53041	5.57473	5.61906	5.62349	5.62792	5.63235	5.63679	5.64122	5.64565	5.65008	5.65451	5.65895	5.66338	5.7077	0
3390	3.39	-29.503	-41.216	-31.655	-12.812	5.42365	5.44987	5.47608	5.5023	5.52851	5.53114	5.53376	5.53638	5.539	5.54162	5.54424	5.54687	5.54949	5.55211	5.55473	5.58095	0
3410	3.41	-28.698	-40.441	-31.315	-12.545	5.44169	5.48595	5.5302	5.57446	5.61872	5.62314	5.62757	5.63199	5.63642	5.64085	5.64527	5.6497	5.65412	5.65855	5.66297	5.70723	0
3430	3.43	-29.116	-40.149	-32.014	-12.514	5.44379	5.49014	5.53649	5.58284	5.62919	5.63383	5.63846	5.6431	5.64773	5.65237	5.657	5.66164	5.66627	5.67091	5.67554	5.72189	0
3450	3.45	-29.472	-41.215	-32.026	-12.892	5.41824	5.43906	5.45987	5.48068	5.50149	5.50357	5.50565	5.50773	5.50981	5.51189	5.51397	5.51606	5.51814	5.52022	5.5223	5.54311	0
3470	3.47	-28.868	-39.909	-32.341	-12.53	5.4427	5.48797	5.53324	5.57851	5.62379	5.62831	5.63284	5.63737	5.64189	5.64642	5.65095	5.65547	5.66	5.66453	5.66906	5.71433	0
3490	3.49	-28.618	-39.908	-31.066	-12.287	5.45912	5.52081	5.5825	5.64419	5.70588	5.71205	5.71822	5.72439	5.73056	5.73672	5.74289	5.74906	5.75523	5.7614	5.76757	5.82926	0
3510	3.51	-29.316	-41.989	-31.285	-12.617	5.43683	5.47622	5.51561	5.555	5.59439	5.59833	5.60227	5.60621	5.61015	5.61409	5.61803	5.62197	5.62591	5.62985	5.63379	5.67318	0
3530	3.53	-29.509	-40.574	-32.554	-13.02	5.4096	5.42176	5.43392	5.44608	5.45824	5.45946	5.46068	5.46189	5.46311	5.46433	5.46554	5.46676	5.46797	5.46919	5.47041	5.48257	0
3550	3.55	-29.769	-41.498	-33.138	-12.852	5.42095	5.44446	5.46797	5.49149	5.515	5.51735	5.5197	5.52206	5.52441	5.52676	5.52911	5.53146	5.53381	5.53616	5.53851	5.56203	0
3570	3.57	-29.397	-40.663	-32.005	-13.147	5.40101	5.4046	5.40818	5.41176	5.41534	5.4157	5.41606	5.41641	5.41677	5.41713	5.41749	5.41785	5.4182	5.41856	5.41892	5.4225	0
3590	3.59	-29.685	-41.568	-31.851	-13.044	5.40797	5.41851	5.42906	5.4396	5.45014	5.45119	5.45224	5.4533	5.45435	5.45541	5.45646	5.45751	5.45857	5.45962	5.46068	5.47122	0
3610	3.61	-29.199	-40.896	-31.191	-12.986	5.41189	5.42635	5.44081	5.45527	5.46973	5.47118	5.47262	5.47407	5.47551	5.47696	5.47841	5.47985	5.4813	5.48274	5.48419	5.49865	0
3630	3.63	-28.892	-40.319	-30.793	-13.076	5.40581	5.41419	5.42257	5.43095	5.43933	5.44016	5.441	5.44184	5.44268	5.44351	5.44435	5.44519	5.44603	5.44687	5.4477	5.45608	0
3650	3.65	-29.307	-41.279	-32.324	-12.376	5.45311	5.50879	5.56446	5.62014	5.67581	5.68138	5.68695	5.69251	5.69808	5.70365	5.70922	5.71479	5.72035	5.72592	5.73149	5.78716	0
3670	3.67	-29.411	-40.915	-32.162	-13.364	5.38635	5.37527	5.36419	5.35311	5.34203	5.34092	5.33981	5.3387	5.3376	5.33649	5.33538	5.33427	5.33316	5.33206	5.33095	5.31987	0
3690	3.69	-30.022	-42.177	-33.309	-13.195	5.39777	5.39811	5.39845	5.39879	5.39912	5.39916	5.39919	5.39922	5.39926	5.39929	5.39933	5.39936	5.39939	5.39943	5.39946	5.3998	0
3710	3.71	-30.048	-41.73	-32.872	-13.597	5.37061	5.34379	5.31696	5.29014	5.26331	5.26063	5.25795	5.25526	5.25258	5.2499	5.24722	5.24454	5.24185	5.23917	5.23649	5.20966	0
3730	3.73	-29.595	-41.088	-32.674	-13.263	5.39318	5.38892	5.38466	5.38041	5.37615	5.37572	5.3753	5.37487	5.37445	5.37402	5.3736	5.37317	5.37274	5.37232	5.37189	5.36764	0
3750	3.75	-29.374	-40.755	-31.924	-13.078	5.40568	5.41392	5.42216	5.43041	5.43865	5.43947	5.4403	5.44112	5.44195	5.44277	5.4436	5.44442	5.44524	5.44607	5.44689	5.45514	0
3770	3.77	-29.236	-40.017	-32.225	-13.122	5.4027	5.40797	5.41324	5.41851	5.42379	5.42431	5.42484	5.42537	5.42589	5.42642	5.42695	5.42747	5.428	5.42853	5.42906	5.43433	0
3790	3.79	-29.394	-40.482	-32.688	-13.3	5.39068	5.38392	5.37716	5.37041	5.36365	5.36297	5.3623	5.36162	5.36095	5.36027	5.3596	5.35892	5.35824	5.35757	5.35689	5.35014	0
3810	3.81	-29.266	-41.233	-31.768	-12.677	5.43277	5.46811	5.50345	5.53879	5.57412	5.57766	5.58119	5.58472	5.58826	5.59179	5.59533	5.59886	5.60239	5.60593	5.60946	5.6448	0
3830	3.83	-29.205	-41.153	-31.922	-12.502	5.4446	5.49176	5.53892	5.58608	5.63324	5.63796	5.64268	5.64739	5.65211	5.65683	5.66154	5.66626	5.67097	5.67569	5.68041	5.72757	0
3850	3.85	-29.476	-40.968	-32.426	-12.658	5.43406	5.47068	5.5073	5.54392	5.58054	5.5842	5.58787	5.59153	5.59519	5.59885	5.60251	5.60618	5.60984	5.6135	5.61716	5.65379	0
3870	3.87	-29.476	-40.726	-32.654	-12.805	5.42412	5.45081	5.4775	5.50419	5.53088	5.53355	5.53622	5.53889	5.54156	5.54422	5.54689	5.54956	5.55223	5.5549	5.55757	5.58426	0
3890	3.89	-29.569	-40.926	-33.001	-13.14	5.40149	5.40554	5.4096	5.41365	5.4177	5.41811	5.41851	5.41892	5.41933	5.41973	5.42014	5.42054	5.42095	5.42135	5.42176	5.42581	0
3910	3.91	-29.277	-40.55	-32.065	-13.278	5.39216	5.38689	5.38162	5.37635	5.37108	5.37056	5.37003	5.3695	5.36897	5.36845	5.36792	5.36739	5.36687	5.36634	5.36581	5.36054	0
3930	3.93	-28.892	-40.277	-30.99	-12.938	5.41514	5.43284	5.45054	5.46824	5.48595	5.48772	5.48949	5.49126	5.49303	5.4948	5.49657	5.49834	5.50011	5.50188	5.50365	5.52135	0
3950	3.95	-28.904	-40.745	-31.64	-12.811	5.42372	5.45	5.47629	5.50257	5.52885	5.53148	5.53411	5.53674	5.53937	5.54199	5.54462	5.54725	5.54988	5.55251	5.55514	5.58142	0
3970	3.97	-28.82	-40.11	-31.637	-12.594	5.43838	5.47933	5.52027	5.56122	5.60216	5.60626	5.61035	5.61445	5.61854	5.62264	5.62673	5.63083	5.63492	5.63901	5.64311	5.68406	0
3990	3.99	-28.885	-40.524	-31.133	-12.853	5.42088	5.44433	5.46777	5.49122	5.51466	5.51701	5.51935	5.5217	5.52404	5.52639	5.52873	5.53108	5.53342	5.53576	5.53811	5.56156	0
4010	4.01	-28.996	-40.225	-31.26	-13.094	5.4046	5.41176	5.41892	5.42608	5.43324	5.43396	5.43468	5.43539	5.43611	5.43683	5.43754	5.43826	5.43897	5.43969	5.44041	5.44757	0
4030	4.03	-28.88	-39.498	-32.369	-12.572	5.43987	5.4823	5.52473	5.56716	5.6096	5.61384	5.61808	5.62233	5.62657	5.63081	5.63506	5.6393	5.64354	5.64779	5.65203	5.69446	0
4050	4.05	-28.722	-39.65	-31.696	-12.376	5.45311	5.50879	5.56446	5.62014	5.67581	5.68138	5.68695	5.69251	5.69808	5.70365	5.70922	5.71479	5.72035	5.72592	5.73149	5.78716	0
4070	4.07	-28.734	-40.216	-31.853	-12.629	5.43601	5.4746	5.51318	5.55176	5.59034	5.5942	5.59806	5.60191	5.60577	5.60963	5.61349	5.61735	5.6212	5.62506	5.62892	5.6675	0
4090	4.09	-28.726	-39.784	-31.612	-12.789	5.4252	5.45297	5.48074	5.50851	5.53629	5.53906	5.54184	5.54462	5.54739	5.55017	5.55295	5.55572	5.5585	5.56128	5.56406	5.59183	0
4110	4.11	-29.037	-40.276	-32.361	-12.288	5.45906	5.52068	5.5823	5.64392	5.70554	5.7117	5.71787	5.72403	5.73019	5.73635	5.74251	5.74868	5.75484	5.761	5.76716	5.82879	0
4130	4.13	-29.099	-41.199	-32.017	-12.337	5.45574	5.51406	5.57237	5.63068	5.68899	5.69482	5.70065	5.70648	5.71231	5.71814	5.72397	5.72981	5.73564	5.74147	5.7473	5.80561	0
4150	4.15	-29.049	-40.568	-31.256	-12.677	5.43277	5.46811	5.50345	5.53879	5.57412	5.57766	5.58119	5.58472	5.58826	5.59179	5.59533	5.59886	5.60239	5.60593	5.60946	5.6448	0
4170	4.17	-29.132	-40.984	-32.155	-12.424	5.44987	5.5023	5.55473	5.60716	5.6596	5.66484	5.67008	5.67533	5.68057	5.68581	5.69106	5.6963	5.70154	5.70679	5.71203	5.76446	0
4190	4.19	-29.191	-41.017	-31.939	-12.579	5.43939	5.48135	5.52331	5.56527	5.60723	5.61143	5.61562	5.61982	5.62401	5.62821	5.63241	5.6366	5.6408	5.64499	5.64919	5.69115	0
4210	4.21	-29.176	-40.697	-31.841	-12.271	5.4602	5.52297	5.58574	5.64851	5.71129	5.71756	5.72384	5.73012	5.73639	5.74267	5.74895	5.75522	5.7615	5.76778	5.77406	5.83683	0
4230	4.23	-28.838	-40.906	-31.211	-12.404	5.45122	5.505	5.55879	5.61257	5.66635	5.67173	5.67711	5.68249	5.68787	5.69324	5.69862	5.704	5.70938	5.71476	5.72014	5.77392	0
4250	4.25	-28.714	-39.681	-31.731	-12.345	5.4552	5.51297	5.57074	5.62851	5.68629	5.69206	5.69784	5.70362	5.70939	5.71517	5.72095	5.72672	5.7325	5.73828	5.74406	5.80183	0
4270	4.27	-29.111	-41.018	-32.019	-12.268	5.46041	5.52338	5.58635	5.64933	5.7123	5.7186	5.72489	5.73119	5.73749	5.74379	5.75008	5.75638	5.76268	5.76897	5.77527	5.83824	0
4290	4.29	-29.289	-41.255	-32.264	-12.606	5.43757	5.4777	5.51784	5.55797	5.59811	5.60212	5.60614	5.61015	5.61416	5.61818	5.62219	5.6262	5.63022	5.63423	5.63824	5.67838	0
4310	4.31	-29.336	-41.028	-31.93	-12.744	5.42824	5.45906	5.48987	5.52068	5.55149	5.55457	5.55765	5.56073	5.56381	5.56689	5.56997	5.57306	5.57614	5.57922	5.5823	5.61311	0
4330	4.33	-29.542	-41.17	-32.764	-12.909	5.4171	5.43676	5.45642	5.47608	5.49574	5.49771	5.49968	5.50164	5.50361	5.50558	5.50754	5.50951	5.51147	5.51344	5.51541	5.53507	0
4350	4.35	-29.359	-41.153	-31.917	-12.736	5.42879	5.46014	5.49149	5.52284	5.55419	5.55733	5.56046	5.5636	5.56673	5.56987	5.573	5.57614	5.57927	5.58241	5.58554	5.61689	0
4370	4.37	-29.041	-40.513	-31.52	-12.618	5.43676	5.47608	5.51541	5.55473	5.59406	5.59799	5.60192	5.60585	5.60979	5.61372	5.61765	5.62158	5.62551	5.62945	5.63338	5.6727	0
4390	4.39	-29.059	-40.768	-31.811	-12.437	5.44899	5.50054	5.5521	5.60365	5.6552	5.66036	5.66551	5.67067	5.67583	5.68098	5.68614	5.69129	5.69645	5.7016	5.70676	5.75831	0
4410	4.41	-28.885	-40.376	-31.639	-12.467	5.44696	5.49649	5.54601	5.59554	5.64507	5.65002	5.65497	5.65993	5.66488	5.66983	5.67479	5.67974	5.68469	5.68964	5.6946	5.74412	0
4430	4.43	-29.089	-40.54	-31.866	-13.016	5.40987	5.4223	5.43473	5.44716	5.4596	5.46084	5.46208	5.46333	5.46457	5.46581	5.46706	5.4683	5.46954	5.47079	5.47203	5.48446	0
4450	4.45	-29.579	-41.377	-32.007	-12.53	5.4427	5.48797	5.53324	5.57851	5.62379	5.62831	5.63284	5.63737	5.64189	5.64642	5.65095	5.65547	5.66	5.66453	5.66906	5.71433	0
4470	4.47	-29.397	-41.192	-32.022	-12.92	5.41635	5.43527	5.45419	5.47311	5.49203	5.49392	5.49581	5.4977	5.4996	5.50149	5.50338	5.50527	5.50716	5.50906	5.51095	5.52987	0
4490	4.49	-29.078	-40.9	-31.641	-12.239	5.46237	5.5273	5.59223	5.65716	5.7221	5.72859	5.73508	5.74158	5.74807	5.75456	5.76106	5.76755	5.77404	5.78054	5.78703	5.85196	0
4510	4.51	-29.009	-40.871	-32.098	-12.364	5.45392	5.51041	5.56689	5.62338	5.67987	5.68551	5.69116	5.69681	5.70246	5.70811	5.71376	5.71941	5.72506	5.7307	5.73635	5.79284	0
4530	4.53	-29.045	-41.491	-31.664	-12.514	5.44379	5.49014	5.53649	5.58284	5.62919	5.63383	5.63846	5.6431	5.64773	5.65237	5.657	5.66164	5.66627	5.67091	5.67554	5.72189	0
4550	4.55	-28.88	-40.273	-31.563	-12.582	5.43919	5.48095	5.5227	5.56446	5.60622	5.61039	5.61457	5.61874	5.62292	5.6271	5.63127	5.63545	5.63962	5.6438	5.64797	5.68973	0
4570	4.57	-29.064	-40.464	-31.74	-12.632	5.43581	5.47419	5.51257	5.55095	5.58933	5.59316	5.597	5.60084	5.60468	5.60851	5.61235	5.61619	5.62003	5.62387	5.6277	5.66608	0
4590	4.59	-29.5	-41.843	-31.906	-12.92	5.41635	5.43527	5.45419	5.47311	5.49203	5.49392	5.49581	5.4977	5.4996	5.50149	5.50338	5.50527	5.50716	5.50906	5.51095	5.52987	0
4610	4.61	-29.717	-42.322	-32.589	-12.604	5.4377	5.47797	5.51824	5.55851	5.59879	5.60281	5.60684	5.61087	5.61489	5.61892	5.62295	5.62697	5.631	5.63503	5.63906	5.67933	0
4630	4.63	-29.858	-41.184	-33.171	-12.699	5.43129	5.46514	5.49899	5.53284	5.56669	5.57008	5.57346	5.57685	5.58023	5.58362	5.587	5.59039	5.59377	5.59716	5.60054	5.63439	0
4650	4.65	-29.53	-40.943	-32.965	-12.714	5.43027	5.46311	5.49595	5.52879	5.56162	5.56491	5.56819	5.57147	5.57476	5.57804	5.58133	5.58461	5.58789	5.59118	5.59446	5.6273	0
4670	4.67	-29.066	-40.814	-31.432	-12.56	5.44068	5.48392	5.52716	5.57041	5.61365	5.61797	5.6223	5.62662	5.63095	5.63527	5.6396	5.64392	5.64824	5.65257	5.65689	5.70014	0
4690	4.69	-29.056	-40.597	-31.521	-12.523	5.44318	5.48892	5.53466	5.58041	5.62615	5.63072	5.6353	5.63987	5.64445	5.64902	5.6536	5.65817	5.66274	5.66732	5.67189	5.71764	0
4710	4.71	-29.386	-41.035	-31.84	-12.611	5.43723	5.47703	5.51683	5.55662	5.59642	5.6004	5.60438	5.60836	5.61234	5.61632	5.6203	5.62428	5.62826	5.63224	5.63622	5.67601	0
4730	4.73	-29.704	-41.286	-32.352	-12.871	5.41966	5.44189	5.46412	5.48635	5.50858	5.51081	5.51303	5.51525	5.51747	5.5197	5.52192	5.52414	5.52637	5.52859	5.53081	5.55304	0
4750	4.75	-29.616	-41.483	-32.416	-12.676	5.43284	5.46824	5.50365	5.53906	5.57446	5.578	5.58154	5.58508	5.58862	5.59216	5.5957	5.59924	5.60279	5.60633	5.60987	5.64527	0
4770	4.77	-29.179	-40.46	-32.088	-12.567	5.4402	5.48297	5.52574	5.56851	5.61129	5.61556	5.61984	5.62412	5.62839	5.63267	5.63695	5.64122	5.6455	5.64978	5.65406	5.69683	0
4790	4.79	-28.895	-41.316	-31.221	-12.394	5.45189	5.50635	5.56081	5.61527	5.66973	5.67518	5.68062	5.68607	5.69151	5.69696	5.70241	5.70785	5.7133	5.71874	5.72419	5.77865	0
4810	4.81	-28.967	-41.368	-31.209	-12.482	5.44595	5.49446	5.54297	5.59149	5.64	5.64485	5.6497	5.65456	5.65941	5.66426	5.66911	5.67396	5.67881	5.68366	5.68851	5.73703	0
4830	4.83	-28.882	-40.135	-31.864	-12.695	5.43156	5.46568	5.4998	5.53392	5.56804	5.57145	5.57487	5.57828	5.58169	5.5851	5.58851	5.59193	5.59534	5.59875	5.60216	5.63629	0
4850	4.85	-28.604	-39.836	-31.706	-12.011	5.47777	5.55811	5.63845	5.71879	5.79912	5.80716	5.81519	5.82322	5.83126	5.83929	5.84733	5.85536	5.86339	5.87143	5.87946	5.9598	0
4870	4.87	-28.706	-40.692	-30.916	-12.133	5.46953	5.54162	5.61372	5.68581	5.75791	5.76512	5.77233	5.77954	5.78674	5.79395	5.80116	5.80837	5.81558	5.82279	5.83	5.9021	0
4890	4.89	-28.865	-40.249	-31.819	-12.381	5.45277	5.50811	5.56345	5.61879	5.67412	5.67966	5.68519	5.69072	5.69626	5.70179	5.70733	5.71286	5.71839	5.72393	5.72946	5.7848	0
4910	4.91	-28.783	-40.566	-31.6	-11.958	5.48135	5.56527	5.64919	5.73311	5.81703	5.82542	5.83381	5.8422	5.8506	5.85899	5.86738	5.87577	5.88416	5.89256	5.90095	5.98487	0
4930	4.93	-28.75	-39.624	-31.72	-12.346	5.45514	5.51284	5.57054	5.62824	5.68595	5.69172	5.69749	5.70326	5.70903	5.7148	5.72057	5.72634	5.73211	5.73788	5.74365	5.80135	0
4950	4.95	-28.805	-40.947	-30.913	-11.852	5.48851	5.5796	5.67068	5.76176	5.85284	5.86195	5.87106	5.88016	5.88927	5.89838	5.90749	5.9166	5.9257	5.93481	5.94392	6.035	0
4970	4.97	-28.859	-40.54	-31.752	-12.013	5.47764	5.55784	5.63804	5.71824	5.79845	5.80647	5.81449	5.82251	5.83053	5.83855	5.84657	5.85459	5.86261	5.87063	5.87865	5.95885	0
4990	4.99	-28.735	-40.574	-30.374	-12.567	5.4402	5.48297	5.52574	5.56851	5.61129	5.61556	5.61984	5.62412	5.62839	5.63267	5.63695	5.64122	5.6455	5.64978	5.65406	5.69683	0
5010	5.01	-28.711	-40.432	-31.165	-12.211	5.46426	5.53108	5.59791	5.66473	5.73156	5.73824	5.74492	5.7516	5.75829	5.76497	5.77165	5.77833	5.78501	5.7917	5.79838	5.8652	0
5030	5.03	-28.502	-39.869	-31.145	-12.019	5.47723	5.55703	5.63683	5.71662	5.79642	5.8044	5.81238	5.82036	5.82834	5.83632	5.8443	5.85228	5.86026	5.86824	5.87622	5.95601	0
5050	5.05	-28.674	-39.43	-31.42	-12.666	5.43351	5.4696	5.50568	5.54176	5.57784	5.58145	5.58506	5.58866	5.59227	5.59588	5.59949	5.6031	5.6067	5.61031	5.61392	5.65	0
5070	5.07	-28.885	-40.618	-32.372	-12.343	5.45534	5.51324	5.57115	5.62906	5.68696	5.69275	5.69854	5.70433	5.71012	5.71591	5.7217	5.72749	5.73329	5.73908	5.74487	5.80277	0
5090	5.09	-28.709	-40.39	-31.135	-11.895	5.48561	5.57379	5.66196	5.75014	5.83831	5.84713	5.85595	5.86476	5.87358	5.8824	5.89122	5.90004	5.90885	5.91767	5.92649	6.01466	0
5110	5.11	-28.747	-40.875	-31.122	-12.607	5.4375	5.47757	5.51764	5.5577	5.59777	5.60178	5.60579	5.60979	5.6138	5.61781	5.62181	5.62582	5.62983	5.63383	5.63784	5.67791	0
5130	5.13	-28.808	-40.413	-31.361	-12.244	5.46203	5.52662	5.59122	5.65581	5.72041	5.72687	5.73333	5.73979	5.74624	5.7527	5.75916	5.76562	5.77208	5.77854	5.785	5.8496	0
5150	5.15	-28.356	-39.227	-31.063	-12.099	5.47183	5.54622	5.62061	5.695	5.76939	5.77683	5.78427	5.79171	5.79915	5.80659	5.81403	5.82147	5.82891	5.83635	5.84379	5.91818	0
5170	5.17	-28.41	-40.608	-31.211	-11.635	5.50318	5.60892	5.71466	5.82041	5.92615	5.93672	5.9473	5.95787	5.96845	5.97902	5.9896	6.00017	6.01074	6.02132	6.03189	6.13764	0
5190	5.19	-28.74	-40.695	-31.321	-11.952	5.48176	5.56608	5.65041	5.73473	5.81906	5.82749	5.83592	5.84435	5.85279	5.86122	5.86965	5.87808	5.88651	5.89495	5.90338	5.9877	0
5210	5.21	-29.04	-41.843	-31.871	-11.818	5.49081	5.58419	5.67757	5.77095	5.86433	5.87366	5.883	5.89234	5.90168	5.91101	5.92035	5.92969	5.93903	5.94837	5.9577	6.05108	0
5230	5.23	-29.069	-40.551	-31.652	-12.623	5.43642	5.47541	5.51439	5.55338	5.59237	5.59626	5.60016	5.60406	5.60796	5.61186	5.61576	5.61966	5.62356	5.62745	5.63135	5.67034	0
5250	5.25	-29.429	-41.554	-32.648	-12.231	5.46291	5.52838	5.59385	5.65933	5.7248	5.73135	5.73789	5.74444	5.75099	5.75754	5.76408	5.77063	5.77718	5.78372	5.79027	5.85574	0
5270	5.27	-29.628	-41.066	-32.827	-12.508	5.44419	5.49095	5.5377	5.58446	5.63122	5.63589	5.64057	5.64524	5.64992	5.6546	5.65927	5.66395	5.66862	5.6733	5.67797	5.72473	0
5290	5.29	-29.555	-41.818	-31.9	-12.384	5.45257	5.5077	5.56284	5.61797	5.67311	5.67862	5.68414	5.68965	5.69516	5.70068	5.70619	5.7117	5.71722	5.72273	5.72824	5.78338	0
5310	5.31	-29.374	-41.462	-32.146	-12.607	5.4375	5.47757	5.51764	5.5577	5.59777	5.60178	5.60579	5.60979	5.6138	5.61781	5.62181	5.62582	5.62983	5.63383	5.63784	5.67791	0
5330	5.33	-29.419	-41.097	-31.927	-12.42	5.45014	5.50284	5.55554	5.60824	5.66095	5.66622	5.67149	5.67676	5.68203	5.6873	5.69257	5.69784	5.70311	5.70838	5.71365	5.76635	0
5350	5.35	-29.681	-43.029	-32.199	-12.489	5.44547	5.49351	5.54156	5.5896	5.63764	5.64244	5.64724	5.65205	5.65685	5.66166	5.66646	5.67126	5.67607	5.68087	5.68568	5.73372	0
5370	5.37	-29.503	-41.844	-32.195	-12.384	5.45257	5.5077	5.56284	5.61797	5.67311	5.67862	5.68414	5.68965	5.69516	5.70068	5.70619	5.7117	5.71722	5.72273	5.72824	5.78338	0
5390	5.39	-29.084	-40.545	-31.953	-12.035	5.47615	5.55487	5.63358	5.7123	5.79101	5.79889	5.80676	5.81463	5.8225	5.83037	5.83824	5.84612	5.85399	5.86186	5.86973	5.94845	0
5410	5.41	-28.652	-40.491	-31.251	-12.024	5.47689	5.55635	5.63581	5.71527	5.79473	5.80268	5.81062	5.81857	5.82651	5.83446	5.84241	5.85035	5.8583	5.86624	5.87419	5.95365	0
5430	5.43	-28.863	-41.022	-32.058	-11.745	5.49574	5.59406	5.69237	5.79068	5.88899	5.89882	5.90865	5.91848	5.92831	5.93814	5.94797	5.95781	5.96764	5.97747	5.9873	6.08561	0
5450	5.45	-28.874	-41.039	-31.638	-12.076	5.47338	5.54933	5.62527	5.70122	5.77716	5.78476	5.79235	5.79995	5.80754	5.81514	5.82273	5.83033	5.83792	5.84551	5.85311	5.92906	0
5470	5.47	-28.716	-41.034	-31.4	-11.692	5.49933	5.60122	5.70311	5.805	5.90689	5.91708	5.92727	5.93746	5.94765	5.95784	5.96803	5.97822	5.98841	5.9986	6.00879	6.11068	0
5490	5.49	-28.721	-40.981	-31.125	-11.975	5.4802	5.56297	5.64574	5.72851	5.81129	5.81956	5.82784	5.83612	5.84439	5.85267	5.86095	5.86922	5.8775	5.88578	5.89406	5.97683	0
5510	5.51	-28.717	-40.155	-32.115	-12.005	5.47818	5.55892	5.63966	5.72041	5.80115	5.80922	5.8173	5.82537	5.83345	5.84152	5.8496	5.85767	5.86574	5.87382	5.88189	5.96264	0
5530	5.53	-28.528	-40.226	-31.405	-11.878	5.48676	5.57608	5.66541	5.75473	5.84406	5.85299	5.86192	5.87085	5.87979	5.88872	5.89765	5.90658	5.91551	5.92445	5.93338	6.0227	0
5550	5.55	-28.586	-39.297	-31.57	-12.014	5.47757	5.5577	5.63784	5.71797	5.79811	5.80612	5.81414	5.82215	5.83016	5.83818	5.84619	5.8542	5.86222	5.87023	5.87824	5.95838	0
5570	5.57	-28.665	-40.95	-31.123	-11.999	5.47858	5.55973	5.64088	5.72203	5.80318	5.81129	5.81941	5.82752	5.83564	5.84375	5.85187	5.85998	5.8681	5.87621	5.88433	5.96547	0
5590	5.59	-28.674	-39.887	-31.21	-12.051	5.47507	5.5527	5.63034	5.70797	5.78561	5.79337	5.80114	5.8089	5.81666	5.82443	5.83219	5.83995	5.84772	5.85548	5.86324	5.94088	0
5610	5.61	-28.733	-40.173	-31.378	-12.047	5.47534	5.55324	5.63115	5.70906	5.78696	5.79475	5.80254	5.81033	5.81812	5.82591	5.8337	5.84149	5.84929	5.85708	5.86487	5.94277	0
5630	5.63	-28.762	-40.33	-31.575	-12.079	5.47318	5.54892	5.62466	5.70041	5.77615	5.78372	5.7913	5.79887	5.80645	5.81402	5.8216	5.82917	5.83674	5.84432	5.85189	5.92764	0
5650	5.65	-28.6	-40.481	-31.738	-11.854	5.48838	5.57933	5.67027	5.76122	5.85216	5.86126	5.87035	5.87945	5.88854	5.89764	5.90673	5.91583	5.92492	5.93401	5.94311	6.03406	0
5670	5.67	-28.616	-40.693	-31.095	-12.208	5.46446	5.53149	5.59851	5.66554	5.73257	5.73927	5.74597	5.75268	5.75938	5.76608	5.77279	5.77949	5.78619	5.79289	5.7996	5.86662	0
5690	5.69	-28.722	-40.497	-31.761	-11.817	5.49088	5.58433	5.67777	5.77122	5.86466	5.87401	5.88335	5.8927	5.90204	5.91139	5.92073	5.93008	5.93942	5.94876	5.95811	6.05156	0
5710	5.71	-28.836	-39.846	-32.039	-12.156	5.46797	5.53851	5.60906	5.6796	5.75014	5.75719	5.76424	5.7713	5.77835	5.78541	5.79246	5.79951	5.80657	5.81362	5.82068	5.89122	0
5730	5.73	-28.892	-39.956	-31.258	-12.202	5.46487	5.5323	5.59973	5.66716	5.7346	5.74134	5.74808	5.75483	5.76157	5.76831	5.77506	5.7818	5.78854	5.79529	5.80203	5.86946	0
5750	5.75	-28.756	-40.162	-32.258	-12.022	5.47703	5.55662	5.63622	5.71581	5.79541	5.80337	5.81133	5.81929	5.82724	5.8352	5.84316	5.85112	5.85908	5.86704	5.875	5.9546	0
5770	5.77	-28.459	-39.653	-31.077	-12.125	5.47007	5.5427	5.61534	5.68797	5.76061	5.76787	5.77514	5.7824	5.78966	5.79693	5.80419	5.81145	5.81872	5.82598	5.83324	5.90588	0
5790	5.79	-28.715	-40.586	-31.21	-11.991	5.47912	5.56081	5.6425	5.72419	5.80588	5.81405	5.82222	5.83039	5.83856	5.84672	5.85489	5.86306	5.87123	5.8794	5.88757	5.96926	0
5810	5.81	-28.98	-39.784	-32.821	-12.294	5.45865	5.51987	5.58108	5.6423	5.70351	5.70964	5.71576	5.72188	5.728	5.73412	5.74024	5.74637	5.75249	5.75861	5.76473	5.82595	0
5830	5.83	-28.661	-40.728	-31.29	-11.939	5.48264	5.56784	5.65304	5.73824	5.82345	5.83197	5.84049	5.84901	5.85753	5.86605	5.87457	5.88309	5.89161	5.90013	5.90865	5.99385	0
5850	5.85	-28.527	-39.862	-30.869	-12.24	5.4623	5.52716	5.59203	5.65689	5.72176	5.72824	5.73473	5.74122	5.7477	5.75419	5.76068	5.76716	5.77365	5.78014	5.78662	5.85149	0
5870	5.87	-28.487	-39.776	-30.699	-11.87	5.4873	5.57716	5.66703	5.75689	5.84676	5.85574	5.86473	5.87372	5.8827	5.89169	5.90068	5.90966	5.91865	5.92764	5.93662	6.02649	0
5890	5.89	-28.467	-40.768	-30.421	-11.843	5.48912	5.58081	5.6725	5.76419	5.85588	5.86505	5.87422	5.88339	5.89256	5.90172	5.91089	5.92006	5.92923	5.9384	5.94757	6.03926	0
5910	5.91	-28.383	-40.011	-30.901	-11.913	5.48439	5.57135	5.65831	5.74527	5.83223	5.84093	5.84962	5.85832	5.86701	5.87571	5.88441	5.8931	5.9018	5.91049	5.91919	6.00615	0
5930	5.93	-28.47	-39.932	-30.973	-12.014	5.47757	5.5577	5.63784	5.71797	5.79811	5.80612	5.81414	5.82215	5.83016	5.83818	5.84619	5.8542	5.86222	5.87023	5.87824	5.95838	0
5950	5.95	-28.645	-40.524	-30.499	-11.905	5.48493	5.57243	5.65993	5.74743	5.83493	5.84368	5.85243	5.86118	5.86993	5.87868	5.88743	5.89618	5.90493	5.91368	5.92243	6.00993	0
5970	5.97	-28.758	-40.271	-31.43	-11.937	5.48277	5.56811	5.65345	5.73879	5.82412	5.83266	5.84119	5.84972	5.85826	5.86679	5.87533	5.88386	5.89239	5.90093	5.90946	5.9948	0
5990	5.99	-29.123	-41.324	-31.903	-11.923	5.48372	5.57	5.65629	5.74257	5.82885	5.83748	5.84611	5.85474	5.86337	5.87199	5.88062	5.88925	5.89788	5.90651	5.91514	6.00142	0
6010	6.01	-29.415	-42.433	-32.072	-12.323	5.45669	5.51595	5.5752	5.63446	5.69372	5.69964	5.70557	5.71149	5.71742	5.72335	5.72927	5.7352	5.74112	5.74705	5.75297	5.81223	0
6030	6.03	-29.278	-40.632	-32.804	-12.048	5.47527	5.55311	5.63095	5.70879	5.78662	5.79441	5.80219	5.80997	5.81776	5.82554	5.83333	5.84111	5.84889	5.85668	5.86446	5.9423	0
6050	6.05	-29.165	-41.283	-31.435	-11.794	5.49243	5.58743	5.68243	5.77743	5.87243	5.88193	5.89143	5.90093	5.91043	5.91993	5.92943	5.93893	5.94843	5.95793	5.96743	6.06243	0
6070	6.07	-29.354	-42.039	-32.134	-12.053	5.47493	5.55243	5.62993	5.70743	5.78493	5.79268	5.80043	5.80818	5.81593	5.82368	5.83143	5.83918	5.84693	5.85468	5.86243	5.93993	0
6090	6.09	-29.105	-40.659	-31.968	-11.753	5.4952	5.59297	5.69074	5.78851	5.88629	5.89606	5.90584	5.91562	5.92539	5.93517	5.94495	5.95472	5.9645	5.97428	5.98406	6.08183	0
6110	6.11	-28.555	-40.317	-31.651	-11.353	5.52223	5.64703	5.77183	5.89662	6.02142	6.0339	6.04638	6.05886	6.07134	6.08382	6.0963	6.10878	6.12126	6.13374	6.14622	6.27101	0
6130	6.13	-28.456	-40.257	-31.095	-11.253	5.52899	5.66054	5.7921	5.92365	6.0552	6.06836	6.08151	6.09467	6.10783	6.12098	6.13414	6.14729	6.16045	6.1736	6.18676	6.31831	0
6150	6.15	-28.589	-40.464	-31.109	-11.53	5.51027	5.62311	5.73595	5.84879	5.96162	5.97291	5.98419	5.99547	6.00676	6.01804	6.02933	6.04061	6.05189	6.06318	6.07446	6.1873	0
6170	6.17	-28.603	-41.54	-31.053	-11.339	5.52318	5.64892	5.77466	5.90041	6.02615	6.03872	6.0513	6.06387	6.07645	6.08902	6.1016	6.11417	6.12674	6.13932	6.15189	6.27764	0
6190	6.19	-29.025	-40.542	-32.134	-11.592	5.50608	5.61473	5.72338	5.83203	5.94068	5.95154	5.96241	5.97327	5.98414	5.995	6.00587	6.01673	6.0276	6.03846	6.04933	6.15797	0
6210	6.21	-29.294	-41.19	-32.028	-12.009	5.47791	5.55838	5.63885	5.71933	5.7998	5.80785	5.81589	5.82394	5.83199	5.84004	5.84808	5.85613	5.86418	5.87222	5.88027	5.96074	0
6230	6.23	-29.187	-41.405	-32.208	-12.343	5.45534	5.51324	5.57115	5.62906	5.68696	5.69275	5.69854	5.70433	5.71012	5.71591	5.7217	5.72749	5.73329	5.73908	5.74487	5.80277	0
6250	6.25	-29.117	-40.896	-31.881	-11.793	5.4925	5.58757	5.68264	5.7777	5.87277	5.88228	5.89179	5.90129	5.9108	5.92031	5.92981	5.93932	5.94883	5.95833	5.96784	6.06291	0
6270	6.27	-29.07	-40.828	-31.619	-11.983	5.47966	5.56189	5.64412	5.72635	5.80858	5.81681	5.82503	5.83325	5.84147	5.8497	5.85792	5.86614	5.87437	5.88259	5.89081	5.97304	0
6290	6.29	-28.8	-40.843	-31.771	-11.47	5.51433	5.63122	5.74811	5.865	5.98189	5.99358	6.00527	6.01696	6.02865	6.04034	6.05203	6.06372	6.07541	6.0871	6.09879	6.21568	0
6310	6.31	-28.686	-40.352	-31.842	-11.499	5.51237	5.6273	5.74223	5.85716	5.9721	5.98359	5.99508	6.00658	6.01807	6.02956	6.04106	6.05255	6.06404	6.07554	6.08703	6.20196	0
6330	6.33	-28.826	-41.165	-31.868	-11.581	5.50683	5.61622	5.72561	5.835	5.94439	5.95533	5.96627	5.97721	5.98815	5.99909	6.01003	6.02097	6.03191	6.04285	6.05379	6.16318	0
6350	6.35	-28.869	-40.223	-31.22	-11.852	5.48851	5.5796	5.67068	5.76176	5.85284	5.86195	5.87106	5.88016	5.88927	5.89838	5.90749	5.9166	5.9257	5.93481	5.94392	6.035	0
6370	6.37	-28.742	-40.436	-31.187	-12.09	5.47243	5.54743	5.62243	5.69743	5.77243	5.77993	5.78743	5.79493	5.80243	5.80993	5.81743	5.82493	5.83243	5.83993	5.84743	5.92243	0
6390	6.39	-28.677	-40.566	-30.963	-11.709	5.49818	5.59892	5.69966	5.80041	5.90115	5.91122	5.9213	5.93137	5.94145	5.95152	5.9616	5.97167	5.98174	5.99182	6.00189	6.10264	0
6410	6.41	-28.943	-41.367	-31.225	-11.954	5.48162	5.56581	5.65	5.73419	5.81838	5.8268	5.83522	5.84364	5.85206	5.86047	5.86889	5.87731	5.88573	5.89415	5.90257	5.98676	0
6430	6.43	-28.992	-41.635	-31.513	-11.706	5.49838	5.59933	5.70027	5.80122	5.90216	5.91226	5.92235	5.93245	5.94254	5.95264	5.96273	5.97283	5.98292	5.99301	6.00311	6.10406	0
6450	6.45	-28.915	-41.476	-32.212	-11.602	5.50541	5.61338	5.72135	5.82933	5.9373	5.9481	5.95889	5.96969	5.98049	5.99129	6.00208	6.01288	6.02368	6.03447	6.04527	6.15324	0
6470	6.47	-28.77	-40.31	-31.21	-11.715	5.49777	5.59811	5.69845	5.79879	5.89912	5.90916	5.91919	5.92922	5.93926	5.94929	5.95933	5.96936	5.97939	5.98943	5.99946	6.0998	0
6490	6.49	-28.656	-40.684	-31.733	-11.571	5.5075	5.61757	5.72764	5.8377	5.94777	5.95878	5.96979	5.98079	5.9918	6.00281	6.01381	6.02482	6.03583	6.04683	6.05784	6.16791	0
6510	6.51	-28.83	-40.643	-31.32	-11.953	5.48169	5.56595	5.6502	5.73446	5.81872	5.82714	5.83557	5.84399	5.85242	5.86085	5.86927	5.8777	5.88612	5.89455	5.90297	5.98723	0
6530	6.53	-29.015	-41.622	-31.309	-11.422	5.51757	5.6377	5.75784	5.87797	5.99811	6.01012	6.02214	6.03415	6.04616	6.05818	6.07019	6.0822	6.09422	6.10623	6.11824	6.23838	0
6550	6.55	-28.896	-40.179	-31.912	-11.978	5.48	5.56257	5.64514	5.7277	5.81027	5.81853	5.82679	5.83504	5.8433	5.85156	5.85981	5.86807	5.87633	5.88458	5.89284	5.97541	0
6570	6.57	-28.655	-40.572	-31.735	-11.63	5.50351	5.6096	5.71568	5.82176	5.92784	5.93845	5.94906	5.95966	5.97027	5.98088	5.99149	6.0021	6.0127	6.02331	6.03392	6.14	0
6590	6.59	-28.858	-41.778	-31.184	-11.549	5.50899	5.62054	5.7321	5.84365	5.9552	5.96636	5.97751	5.98867	5.99983	6.01098	6.02214	6.03329	6.04445	6.0556	6.06676	6.17831	0
6610	6.61	-28.776	-41.323	-31.469	-11.404	5.51879	5.64014	5.76149	5.88284	6.00419	6.01633	6.02846	6.0406	6.05273	6.06487	6.077	6.08914	6.10127	6.11341	6.12554	6.24689	0
6630	6.63	-28.275	-39.812	-30.605	-11.556	5.50851	5.6196	5.73068	5.84176	5.95284	5.96395	5.97506	5.98616	5.99727	6.00838	6.01949	6.0306	6.0417	6.05281	6.06392	6.175	0
6650	6.65	-28.569	-40.297	-31.517	-11.536	5.50987	5.6223	5.73473	5.84716	5.9596	5.97084	5.98208	5.99333	6.00457	6.01581	6.02706	6.0383	6.04954	6.06079	6.07203	6.18446	0
6670	6.67	-28.787	-40.242	-31.683	-11.609	5.50493	5.61243	5.71993	5.82743	5.93493	5.94568	5.95643	5.96718	5.97793	5.98868	5.99943	6.01018	6.02093	6.03168	6.04243	6.14993	0
6690	6.69	-28.604	-40.118	-31.319	-11.387	5.51993	5.64243	5.76493	5.88743	6.00993	6.02218	6.03443	6.04668	6.05893	6.07118	6.08343	6.09568	6.10793	6.12018	6.13243	6.25493	0
6710	6.71	-28.474	-39.855	-31.41	-11.596	5.50581	5.61419	5.72257	5.83095	5.93933	5.95016	5.961	5.97184	5.98268	5.99351	6.00435	6.01519	6.02603	6.03687	6.0477	6.15608	0
6730	6.73	-27.952	-39.834	-30.02	-11.492	5.51284	5.62824	5.74365	5.85906	5.97446	5.986	5.99754	6.00908	6.02062	6.03216	6.0437	6.05524	6.06679	6.07833	6.08987	6.20527	0
6750	6.75	-27.902	-39.778	-30.933	-10.522	5.57838	5.75933	5.94027	6.12122	6.30216	6.32026	6.33835	6.35645	6.37454	6.39264	6.41073	6.42883	6.44692	6.46501	6.48311	6.66406	0
6770	6.77	-27.866	-39.254	-30.984	-10.932	5.55068	5.70392	5.85716	6.01041	6.16365	6.17897	6.1943	6.20962	6.22495	6.24027	6.2556	6.27092	6.28624	6.30157	6.31689	6.47014	0
6790	6.79	-28.018	-40.352	-30.868	-10.699	5.56642	5.73541	5.90439	6.07338	6.24237	6.25926	6.27616	6.29306	6.30996	6.32686	6.34376	6.36066	6.37756	6.39445	6.41135	6.58034	0
6810	6.81	-28.078	-39.636	-31.812	-10.995	5.54642	5.69541	5.84439	5.99338	6.14237	6.15726	6.17216	6.18706	6.20196	6.21686	6.23176	6.24666	6.26156	6.27645	6.29135	6.44034	0
6830	6.83	-28.251	-39.77	-31.136	-11.152	5.53581	5.67419	5.81257	5.95095	6.08933	6.10316	6.117	6.13084	6.14468	6.15851	6.17235	6.18619	6.20003	6.21387	6.2277	6.36608	0
6850	6.85	-28.66	-40.944	-31.836	-11.458	5.51514	5.63284	5.75054	5.86824	5.98595	5.99772	6.00949	6.02126	6.03303	6.0448	6.05657	6.06834	6.08011	6.09188	6.10365	6.22135	0
6870	6.87	-28.442	-40.611	-31.412	-10.972	5.54797	5.69851	5.84906	5.9996	6.15014	6.16519	6.18024	6.1953	6.21035	6.22541	6.24046	6.25551	6.27057	6.28562	6.30068	6.45122	0
6890	6.89	-28.059	-39.798	-30.427	-11.251	5.52912	5.66081	5.7925	5.92419	6.05588	6.06905	6.08222	6.09539	6.10856	6.12172	6.13489	6.14806	6.16123	6.1744	6.18757	6.31926	0
6910	6.91	-28.362	-40.033	-31.506	-11.532	5.51014	5.62284	5.73554	5.84824	5.96095	5.97222	5.98349	5.99476	6.00603	6.0173	6.02857	6.03984	6.05111	6.06238	6.07365	6.18635	0
6930	6.93	-28.648	-40.661	-32.052	-11.116	5.53824	5.67906	5.81987	5.96068	6.10149	6.11557	6.12965	6.14373	6.15781	6.17189	6.18597	6.20006	6.21414	6.22822	6.2423	6.38311	0
6950	6.95	-28.46	-40.599	-30.761	-11.177	5.53412	5.67081	5.8075	5.94419	6.08088	6.09455	6.10822	6.12189	6.13556	6.14922	6.16289	6.17656	6.19023	6.2039	6.21757	6.35426	0
6970	6.97	-28.473	-40.396	-31.095	-11.132	5.53716	5.67689	5.81662	5.95635	6.09608	6.11006	6.12403	6.138	6.15197	6.16595	6.17992	6.19389	6.20787	6.22184	6.23581	6.37554	0
6990	6.99	-28.438	-40.001	-31.998	-11.025	5.54439	5.69135	5.83831	5.98527	6.13223	6.14693	6.16162	6.17632	6.19101	6.20571	6.22041	6.2351	6.2498	6.26449	6.27919	6.42615	0
7010	7.01	-28.641	-41.319	-32.093	-10.716	5.56527	5.73311	5.90095	6.06879	6.23662	6.25341	6.27019	6.28697	6.30376	6.32054	6.33733	6.35411	6.37089	6.38768	6.40446	6.5723	0
7030	7.03	-28.845	-41.402	-31.803	-11.262	5.52838	5.65933	5.79027	5.92122	6.05216	6.06526	6.07835	6.09145	6.10454	6.11764	6.13073	6.14383	6.15692	6.17001	6.18311	6.31406	0
7050	7.05	-29.044	-41.528	-31.739	-11.334	5.52351	5.6496	5.77568	5.90176	6.02784	6.04045	6.05306	6.06566	6.07827	6.09088	6.10349	6.1161	6.1287	6.14131	6.15392	6.28	0
7070	7.07	-28.971	-42.422	-31.742	-11.168	5.53473	5.67203	5.80933	5.94662	6.08392	6.09765	6.11138	6.12511	6.13884	6.15257	6.1663	6.18003	6.19376	6.20749	6.22122	6.35851	0
7090	7.09	-28.732	-41.022	-31.26	-11.199	5.53264	5.66784	5.80304	5.93824	6.07345	6.08697	6.10049	6.11401	6.12753	6.14105	6.15457	6.16809	6.18161	6.19513	6.20865	6.34385	0
7110	7.11	-28.895	-41.452	-31.065	-11.724	5.49716	5.59689	5.69662	5.79635	5.89608	5.90606	5.91603	5.926	5.93597	5.94595	5.95592	5.96589	5.97587	5.98584	5.99581	6.09554	0
7130	7.13	-29.174	-41.246	-31.985	-11.718	5.49757	5.5977	5.69784	5.79797	5.89811	5.90812	5.91814	5.92815	5.93816	5.94818	5.95819	5.9682	5.97822	5.98823	5.99824	6.09838	0
7150	7.15	-28.806	-41.166	-31.601	-10.971	5.54804	5.69865	5.84926	5.99987	6.15047	6.16554	6.1806	6.19566	6.21072	6.22578	6.24084	6.2559	6.27096	6.28602	6.30108	6.45169	0
7170	7.17	-28.652	-40.496	-31.94	-11.191	5.53318	5.66892	5.80466	5.94041	6.07615	6.08972	6.1033	6.11687	6.13045	6.14402	6.1576	6.17117	6.18474	6.19832	6.21189	6.34764	0
7190	7.19	-28.767	-41.07	-31.366	-11.636	5.50311	5.60879	5.71446	5.82014	5.92581	5.93638	5.94695	5.95751	5.96808	5.97865	5.98922	5.99979	6.01035	6.02092	6.03149	6.13716	0
7210	7.21	-28.968	-41.178	-32.214	-11.191	5.53318	5.66892	5.80466	5.94041	6.07615	6.08972	6.1033	6.11687	6.13045	6.14402	6.1576	6.17117	6.18474	6.19832	6.21189	6.34764	0
7230	7.23	-28.762	-40.926	-31.593	-11.417	5.51791	5.63838	5.75885	5.87933	5.9998	6.01185	6.02389	6.03594	6.04799	6.06004	6.07208	6.08413	6.09618	6.10822	6.12027	6.24074	0
7250	7.25	-28.64	-40.972	-30.543	-11.511	5.51156	5.62568	5.7398	5.85392	5.96804	5.97945	5.99087	6.00228	6.01369	6.0251	6.03651	6.04793	6.05934	6.07075	6.08216	6.19629	0
7270	7.27	-28.322	-40.589	-31.175	-10.905	5.5525	5.70757	5.86264	6.0177	6.17277	6.18828	6.20379	6.21929	6.2348	6.25031	6.26581	6.28132	6.29683	6.31233	6.32784	6.48291	0
7290	7.29	-28.236	-41.273	-30.258	-10.881	5.55412	5.71081	5.8675	6.02419	6.18088	6.19655	6.21222	6.22789	6.24356	6.25922	6.27489	6.29056	6.30623	6.3219	6.33757	6.49426	0
7310	7.31	-28.182	-40.882	-31.241	-10.69	5.56703	5.73662	5.90622	6.07581	6.24541	6.26237	6.27933	6.29629	6.31324	6.3302	6.34716	6.36412	6.38108	6.39804	6.415	6.5846	0
7330	7.33	-28.283	-40.55	-30.791	-11	5.54608	5.69473	5.84338	5.99203	6.14068	6.15554	6.17041	6.18527	6.20014	6.215	6.22987	6.24473	6.2596	6.27446	6.28933	6.43797	0
7350	7.35	-28.32	-40.883	-30.511	-11.15	5.53595	5.67446	5.81297	5.95149	6.09	6.10385	6.1177	6.13156	6.14541	6.15926	6.17311	6.18696	6.20081	6.21466	6.22851	6.36703	0
7370	7.37	-28.069	-40.069	-31.114	-10.88	5.55419	5.71095	5.8677	6.02446	6.18122	6.19689	6.21257	6.22824	6.24392	6.2596	6.27527	6.29095	6.30662	6.3223	6.33797	6.49473	0
7390	7.39	-28.126	-40.558	-30.546	-10.972	5.54797	5.69851	5.84906	5.9996	6.15014	6.16519	6.18024	6.1953	6.21035	6.22541	6.24046	6.25551	6.27057	6.28562	6.30068	6.45122	0
7410	7.41	-28.343	-40.16	-31.297	-10.546	5.57676	5.75608	5.93541	6.11473	6.29406	6.31199	6.32992	6.34785	6.36579	6.38372	6.40165	6.41958	6.43751	6.45545	6.47338	6.6527	0
7430	7.43	-28.484	-40.488	-31.281	-11.411	5.51831	5.63919	5.76007	5.88095	6.00183	6.01391	6.026	6.03809	6.05018	6.06226	6.07435	6.08644	6.09853	6.11062	6.1227	6.24358	0
7450	7.45	-28.718	-40.473	-31.444	-11.314	5.52487	5.6523	5.77973	5.90716	6.0346	6.04734	6.06008	6.07283	6.08557	6.09831	6.11106	6.1238	6.13654	6.14929	6.16203	6.28946	0
7470	7.47	-29.079	-42.16	-31.563	-11.037	5.54358	5.68973	5.83588	5.98203	6.12818	6.14279	6.15741	6.17202	6.18664	6.20125	6.21587	6.23048	6.2451	6.25971	6.27433	6.42047	0
7490	7.49	-29.035	-41.252	-32.178	-11.258	5.52865	5.65987	5.79108	5.9223	6.05351	6.06664	6.07976	6.09288	6.106	6.11912	6.13224	6.14537	6.15849	6.17161	6.18473	6.31595	0
7510	7.51	-28.507	-40.774	-30.998	-11.245	5.52953	5.66162	5.79372	5.92581	6.05791	6.07112	6.08433	6.09754	6.11074	6.12395	6.13716	6.15037	6.16358	6.17679	6.19	6.3221	0
7530	7.53	-28.273	-39.946	-31.476	-10.85	5.55622	5.715	5.87379	6.03257	6.19135	6.20723	6.22311	6.23899	6.25487	6.27074	6.28662	6.3025	6.31838	6.33426	6.35014	6.50892	0
7550	7.55	-28.253	-40.723	-30.716	-10.578	5.5746	5.75176	5.92892	6.10608	6.28324	6.30096	6.31868	6.33639	6.35411	6.37183	6.38954	6.40726	6.42497	6.44269	6.46041	6.63757	0
7570	7.57	-28.021	-40.3	-30.708	-10.743	5.56345	5.72946	5.89547	6.06149	6.2275	6.2441	6.2607	6.27731	6.29391	6.31051	6.32711	6.34371	6.36031	6.37691	6.39351	6.55953	0
7590	7.59	-28.19	-40.569	-31.102	-10.906	5.55243	5.70743	5.86243	6.01743	6.17243	6.18793	6.20343	6.21893	6.23443	6.24993	6.26543	6.28093	6.29643	6.31193	6.32743	6.48243	0
7610	7.61	-28.711	-41.017	-31.673	-10.886	5.55379	5.71014	5.86649	6.02284	6.17919	6.19483	6.21046	6.2261	6.24173	6.25737	6.273	6.28864	6.30427	6.31991	6.33554	6.49189	0
7630	7.63	-28.79	-41.696	-32.029	-10.564	5.57554	5.75365	5.93176	6.10987	6.28797	6.30579	6.3236	6.34141	6.35922	6.37703	6.39484	6.41265	6.43046	6.44827	6.46608	6.64419	0
7650	7.65	-28.433	-41.017	-31.284	-10.333	5.59115	5.78487	5.97858	6.1723	6.36601	6.38539	6.40476	6.42413	6.4435	6.46287	6.48224	6.50162	6.52099	6.54036	6.55973	6.75345	0
7670	7.67	-28.25	-40.496	-31.44	-10.384	5.5877	5.77797	5.96824	6.15851	6.34879	6.36781	6.38684	6.40587	6.42489	6.44392	6.46295	6.48197	6.501	6.52003	6.53906	6.72933	0
7690	7.69	-27.988	-39.856	-30.426	-10.547	5.57669	5.75595	5.9352	6.11446	6.29372	6.31164	6.32957	6.34749	6.36542	6.38335	6.40127	6.4192	6.43712	6.45505	6.47297	6.65223	0
7710	7.71	-27.874	-40.516	-30.584	-10.063	5.60939	5.82135	6.03331	6.24527	6.45723	6.47843	6.49962	6.52082	6.54201	6.56321	6.58441	6.6056	6.6268	6.64799	6.66919	6.88115	0
7730	7.73	-27.958	-40.413	-30.219	-10.366	5.58892	5.78041	5.97189	6.16338	6.35487	6.37401	6.39316	6.41231	6.43146	6.45061	6.46976	6.48891	6.50806	6.5272	6.54635	6.73784	0
7750	7.75	-28.106	-40.053	-30.664	-10.391	5.58723	5.77703	5.96683	6.15662	6.34642	6.3654	6.38438	6.40336	6.42234	6.44132	6.4603	6.47928	6.49826	6.51724	6.53622	6.72601	0
7770	7.77	-28.11	-40.347	-31.262	-10.244	5.59716	5.79689	5.99662	6.19635	6.39608	6.41606	6.43603	6.456	6.47597	6.49595	6.51592	6.53589	6.55587	6.57584	6.59581	6.79554	0
7790	7.79	-27.792	-39.869	-31.226	-10.075	5.60858	5.81973	6.03088	6.24203	6.45318	6.47429	6.49541	6.51652	6.53764	6.55875	6.57987	6.60098	6.6221	6.64321	6.66433	6.87547	0
7810	7.81	-27.931	-40.488	-30.734	-9.987	5.61453	5.83162	6.04872	6.26581	6.48291	6.50462	6.52633	6.54804	6.56974	6.59145	6.61316	6.63487	6.65658	6.67829	6.7	6.9171	0
7830	7.83	-28.022	-39.766	-30.654	-10.387	5.5875	5.77757	5.96764	6.1577	6.34777	6.36678	6.38579	6.40479	6.4238	6.44281	6.46181	6.48082	6.49983	6.51883	6.53784	6.72791	0
7850	7.85	-28.388	-41.421	-31.954	-9.945	5.61737	5.8373	6.05723	6.27716	6.4971	6.51909	6.54108	6.56308	6.58507	6.60706	6.62906	6.65105	6.67304	6.69504	6.71703	6.93696	0
7870	7.87	-28.707	-41.947	-30.776	-10.807	5.55912	5.72081	5.8825	6.04419	6.20588	6.22205	6.23822	6.25439	6.27056	6.28672	6.30289	6.31906	6.33523	6.3514	6.36757	6.52926	0
7890	7.89	-28.744	-41.855	-31.29	-10.654	5.56946	5.74149	5.91351	6.08554	6.25757	6.27477	6.29197	6.30918	6.32638	6.34358	6.36079	6.37799	6.39519	6.41239	6.4296	6.60162	0
7910	7.91	-28.622	-42.017	-31.159	-10.494	5.58027	5.76311	5.94595	6.12879	6.31162	6.32991	6.34819	6.36647	6.38476	6.40304	6.42133	6.43961	6.45789	6.47618	6.49446	6.6773	0
7930	7.93	-28.412	-40.748	-31.489	-10.364	5.58906	5.78068	5.9723	6.16392	6.35554	6.3747	6.39387	6.41303	6.43219	6.45135	6.47051	6.48968	6.50884	6.528	6.54716	6.73879	0
7950	7.95	-28.17	-39.947	-30.54	-10.378	5.58811	5.77879	5.96946	6.16014	6.35081	6.36988	6.38895	6.40801	6.42708	6.44615	6.46522	6.48429	6.50335	6.52242	6.54149	6.73216	0
7970	7.97	-28.218	-41.651	-30.245	-10.113	5.60601	5.8146	6.02318	6.23176	6.44034	6.4612	6.48206	6.50291	6.52377	6.54463	6.56549	6.58635	6.6072	6.62806	6.64892	6.8575	0
7990	7.99	-28.547	-41.404	-31.987	-10.412	5.58581	5.77419	5.96257	6.15095	6.33933	6.35816	6.377	6.39584	6.41468	6.43351	6.45235	6.47119	6.49003	6.50887	6.5277	6.71608	0
8010	8.01	-29.442	-42.163	-32.02	-11.054	5.54243	5.68743	5.83243	5.97743	6.12243	6.13693	6.15143	6.16593	6.18043	6.19493	6.20943	6.22393	6.23843	6.25293	6.26743	6.41243	0
8030	8.03	-29.555	-42.161	-32.044	-11.196	5.53284	5.66824	5.80365	5.93906	6.07446	6.088	6.10154	6.11508	6.12862	6.14216	6.1557	6.16924	6.18279	6.19633	6.20987	6.34527	0
8050	8.05	-29.294	-42.011	-32.102	-11.313	5.52493	5.65243	5.77993	5.90743	6.03493	6.04768	6.06043	6.07318	6.08593	6.09868	6.11143	6.12418	6.13693	6.14968	6.16243	6.28993	0
8070	8.07	-29.15	-42.128	-31.305	-11.242	5.52973	5.66203	5.79433	5.92662	6.05892	6.07215	6.08538	6.09861	6.11184	6.12507	6.1383	6.15153	6.16476	6.17799	6.19122	6.32351	0
8090	8.09	-29.615	-41.878	-32.328	-11.097	5.53953	5.68162	5.82372	5.96581	6.10791	6.12212	6.13633	6.15054	6.16474	6.17895	6.19316	6.20737	6.22158	6.23579	6.25	6.3921	0
8110	8.11	-30.169	-43.067	-32.428	-11.713	5.49791	5.59838	5.69885	5.79933	5.8998	5.90985	5.91989	5.92994	5.93999	5.95004	5.96008	5.97013	5.98018	5.99022	6.00027	6.10074	0
8130	8.13	-30.475	-43.548	-33.073	-11.827	5.4902	5.58297	5.67574	5.76851	5.86129	5.87056	5.87984	5.88912	5.89839	5.90767	5.91695	5.92622	5.9355	5.94478	5.95406	6.04683	0
8150	8.15	-31.047	-44.645	-33.427	-12.103	5.47156	5.54568	5.6198	5.69392	5.76804	5.77545	5.78287	5.79028	5.79769	5.8051	5.81251	5.81993	5.82734	5.83475	5.84216	5.91629	0
8170	8.17	-31.473	-45.646	-34.613	-12.02	5.47716	5.55689	5.63662	5.71635	5.79608	5.80406	5.81203	5.82	5.82797	5.83595	5.84392	5.85189	5.85987	5.86784	5.87581	5.95554	0
8190	8.19	-31.717	-45.122	-34.731	-12.493	5.4452	5.49297	5.54074	5.58851	5.63629	5.64106	5.64584	5.65062	5.65539	5.66017	5.66495	5.66972	5.6745	5.67928	5.68406	5.73183	0
8210	8.21	-31.463	-45.163	-33.08	-12.387	5.45237	5.5073	5.56223	5.61716	5.6721	5.67759	5.68308	5.68858	5.69407	5.69956	5.70506	5.71055	5.71604	5.72154	5.72703	5.78196	0
8230	8.23	-30.42	-43.221	-33.611	-11.797	5.49223	5.58703	5.68183	5.77662	5.87142	5.8809	5.89038	5.89986	5.90934	5.91882	5.9283	5.93778	5.94726	5.95674	5.96622	6.06101	0
8250	8.25	-29.414	-42.594	-31.969	-11.248	5.52933	5.66122	5.79311	5.925	6.05689	6.07008	6.08327	6.09646	6.10965	6.12284	6.13603	6.14922	6.16241	6.1756	6.18879	6.32068	0
8270	8.27	-28.899	-41.826	-30.994	-10.851	5.55615	5.71487	5.87358	6.0323	6.19101	6.20689	6.22276	6.23863	6.2545	6.27037	6.28624	6.30212	6.31799	6.33386	6.34973	6.50845	0
8290	8.29	-28.864	-42.16	-30.935	-10.817	5.55845	5.71946	5.88047	6.04149	6.2025	6.2186	6.2347	6.25081	6.26691	6.28301	6.29911	6.31521	6.33131	6.34741	6.36351	6.52453	0
8310	8.31	-28.832	-41.176	-31.263	-10.917	5.55169	5.70595	5.8602	6.01446	6.16872	6.18414	6.19957	6.21499	6.23042	6.24585	6.26127	6.2767	6.29212	6.30755	6.32297	6.47723	0
8330	8.33	-29.029	-41.41	-32.116	-10.789	5.56034	5.72324	5.88615	6.04906	6.21196	6.22825	6.24454	6.26083	6.27712	6.29341	6.3097	6.32599	6.34229	6.35858	6.37487	6.53777	0
8350	8.35	-29.14	-41.49	-31.36	-11.054	5.54243	5.68743	5.83243	5.97743	6.12243	6.13693	6.15143	6.16593	6.18043	6.19493	6.20943	6.22393	6.23843	6.25293	6.26743	6.41243	0
8370	8.37	-29.279	-41.734	-31.735	-11.462	5.51487	5.6323	5.74973	5.86716	5.9846	5.99634	6.00808	6.01983	6.03157	6.04331	6.05506	6.0668	6.07854	6.09029	6.10203	6.21946	0
8390	8.39	-29.082	-41.933	-31.904	-10.649	5.5698	5.74216	5.91453	6.08689	6.25926	6.27649	6.29373	6.31097	6.3282	6.34544	6.36268	6.37991	6.39715	6.41439	6.43162	6.60399	0
8410	8.41	-28.852	-41.354	-30.878	-11.124	5.5377	5.67797	5.81824	5.95851	6.09879	6.11281	6.12684	6.14087	6.15489	6.16892	6.18295	6.19697	6.211	6.22503	6.23906	6.37933	0
8430	8.43	-28.998	-41.195	-31.507	-11.073	5.54115	5.68487	5.82858	5.9723	6.11601	6.13039	6.14476	6.15913	6.1735	6.18787	6.20224	6.21662	6.23099	6.24536	6.25973	6.40345	0
8450	8.45	-28.922	-42.348	-30.406	-11.106	5.53892	5.68041	5.82189	5.96338	6.10487	6.11901	6.13316	6.14731	6.16146	6.17561	6.18976	6.20391	6.21806	6.2322	6.24635	6.38784	0
8470	8.47	-28.881	-41.091	-31.187	-10.93	5.55081	5.70419	5.85757	6.01095	6.16433	6.17966	6.195	6.21034	6.22568	6.24101	6.25635	6.27169	6.28703	6.30237	6.3177	6.47108	0
8490	8.49	-28.914	-41.224	-31.479	-10.924	5.55122	5.705	5.85879	6.01257	6.16635	6.18173	6.19711	6.21249	6.22787	6.24324	6.25862	6.274	6.28938	6.30476	6.32014	6.47392	0
8510	8.51	-28.973	-41.466	-30.983	-11.416	5.51797	5.63851	5.75906	5.8796	6.00014	6.01219	6.02424	6.0363	6.04835	6.06041	6.07246	6.08451	6.09657	6.10862	6.12068	6.24122	0
8530	8.53	-28.85	-42.579	-30.869	-10.54	5.57716	5.75689	5.93662	6.11635	6.29608	6.31406	6.33203	6.35	6.36797	6.38595	6.40392	6.42189	6.43987	6.45784	6.47581	6.65554	0
8550	8.55	-28.513	-41.298	-30.338	-11.035	5.54372	5.69	5.83629	5.98257	6.12885	6.14348	6.15811	6.17274	6.18737	6.20199	6.21662	6.23125	6.24588	6.26051	6.27514	6.42142	0
8570	8.57	-28.509	-41.195	-30.619	-10.655	5.56939	5.74135	5.91331	6.08527	6.25723	6.27443	6.29162	6.30882	6.32601	6.34321	6.36041	6.3776	6.3948	6.41199	6.42919	6.60115	0
8590	8.59	-28.725	-41.419	-31.212	-10.778	5.56108	5.72473	5.88838	6.05203	6.21568	6.23204	6.24841	6.26477	6.28114	6.2975	6.31387	6.33023	6.3466	6.36296	6.37933	6.54297	0
8610	8.61	-28.935	-41.597	-31.907	-10.882	5.55406	5.71068	5.8673	6.02392	6.18054	6.1962	6.21187	6.22753	6.24319	6.25885	6.27451	6.29018	6.30584	6.3215	6.33716	6.49379	0
8630	8.63	-29.302	-42.246	-31.57	-11.327	5.52399	5.65054	5.7771	5.90365	6.0302	6.04286	6.05551	6.06817	6.08083	6.09348	6.10614	6.11879	6.13145	6.1441	6.15676	6.28331	0
8650	8.65	-29.335	-42.213	-31.462	-11.12	5.53797	5.67851	5.81906	5.9596	6.10014	6.11419	6.12824	6.1423	6.15635	6.17041	6.18446	6.19851	6.21257	6.22662	6.24068	6.38122	0
8670	8.67	-29.093	-42.163	-31.364	-10.868	5.555	5.71257	5.87014	6.0277	6.18527	6.20103	6.21679	6.23254	6.2483	6.26406	6.27981	6.29557	6.31133	6.32708	6.34284	6.50041	0
8690	8.69	-29.01	-42.218	-30.914	-11.122	5.53784	5.67824	5.81865	5.95906	6.09946	6.1135	6.12754	6.14158	6.15562	6.16966	6.1837	6.19774	6.21179	6.22583	6.23987	6.38027	0
8710	8.71	-28.834	-41.844	-30.57	-10.641	5.57034	5.74324	5.91615	6.08906	6.26196	6.27925	6.29654	6.31383	6.33112	6.34841	6.3657	6.38299	6.40029	6.41758	6.43487	6.60777	0
8730	8.73	-28.802	-42.051	-30.957	-10.585	5.57412	5.75081	5.9275	6.10419	6.28088	6.29855	6.31622	6.33389	6.35156	6.36922	6.38689	6.40456	6.42223	6.4399	6.45757	6.63426	0
8750	8.75	-28.813	-41.321	-30.999	-10.692	5.56689	5.73635	5.90581	6.07527	6.24473	6.26168	6.27862	6.29557	6.31251	6.32946	6.34641	6.36335	6.3803	6.39724	6.41419	6.58365	0
8770	8.77	-28.796	-41.497	-31.188	-10.722	5.56487	5.7323	5.89973	6.06716	6.2346	6.25134	6.26808	6.28483	6.30157	6.31831	6.33506	6.3518	6.36854	6.38529	6.40203	6.56946	0
8790	8.79	-28.764	-42.118	-31.191	-10.306	5.59297	5.78851	5.98406	6.1796	6.37514	6.39469	6.41424	6.4338	6.45335	6.47291	6.49246	6.51201	6.53157	6.55112	6.57068	6.76622	0
8810	8.81	-28.715	-41.292	-31.224	-10.727	5.56453	5.73162	5.89872	6.06581	6.23291	6.24962	6.26633	6.28304	6.29974	6.31645	6.33316	6.34987	6.36658	6.38329	6.4	6.5671	0
8830	8.83	-28.587	-41.484	-31.024	-10.593	5.57358	5.74973	5.92588	6.10203	6.27818	6.29579	6.31341	6.33102	6.34864	6.36625	6.38387	6.40148	6.4191	6.43671	6.45433	6.63047	0
8850	8.85	-28.487	-41.619	-30.871	-10.375	5.58831	5.77919	5.97007	6.16095	6.35183	6.37091	6.39	6.40909	6.42818	6.44726	6.46635	6.48544	6.50453	6.52362	6.5427	6.73358	0
8870	8.87	-28.414	-40.82	-30.945	-10.454	5.58297	5.76851	5.95406	6.1396	6.32514	6.34369	6.36224	6.3808	6.39935	6.41791	6.43646	6.45501	6.47357	6.49212	6.51068	6.69622	0
8890	8.89	-28.35	-40.721	-31.267	-10.254	5.59649	5.79554	5.9946	6.19365	6.3927	6.41261	6.43251	6.45242	6.47233	6.49223	6.51214	6.53204	6.55195	6.57185	6.59176	6.79081	0
8910	8.91	-28.319	-40.598	-30.582	-10.438	5.58406	5.77068	5.9573	6.14392	6.33054	6.3492	6.36787	6.38653	6.40519	6.42385	6.44251	6.46118	6.47984	6.4985	6.51716	6.70379	0
8930	8.93	-28.282	-41.432	-30.074	-10.315	5.59237	5.7873	5.98223	6.17716	6.3721	6.39159	6.41108	6.43058	6.45007	6.46956	6.48906	6.50855	6.52804	6.54754	6.56703	6.76196	0
8950	8.95	-28.449	-40.967	-30.657	-10.407	5.58615	5.77487	5.96358	6.1523	6.34101	6.35989	6.37876	6.39763	6.4165	6.43537	6.45424	6.47312	6.49199	6.51086	6.52973	6.71845	0
8970	8.97	-28.506	-39.923	-31.553	-10.943	5.54993	5.70243	5.85493	6.00743	6.15993	6.17518	6.19043	6.20568	6.22093	6.23618	6.25143	6.26668	6.28193	6.29718	6.31243	6.46493	0
8990	8.99	-28.692	-41.353	-31.291	-10.538	5.5773	5.75716	5.93703	6.11689	6.29676	6.31474	6.33273	6.35072	6.3687	6.38669	6.40468	6.42266	6.44065	6.45864	6.47662	6.65649	0
9010	9.01	-28.804	-41.948	-30.917	-10.434	5.58433	5.77122	5.95811	6.145	6.33189	6.35058	6.36927	6.38796	6.40665	6.42534	6.44403	6.46272	6.48141	6.5001	6.51879	6.70568	0
9030	9.03	-28.801	-41.303	-30.672	-10.788	5.56041	5.72338	5.88635	6.04933	6.2123	6.2286	6.24489	6.26119	6.27749	6.29379	6.31008	6.32638	6.34268	6.35897	6.37527	6.53824	0
9050	9.05	-28.781	-41.985	-30.951	-10.501	5.5798	5.76216	5.94453	6.12689	6.30926	6.32749	6.34573	6.36397	6.3822	6.40044	6.41868	6.43691	6.45515	6.47339	6.49162	6.67399	0
9070	9.07	-28.735	-41.943	-30.638	-10.468	5.58203	5.76662	5.95122	6.13581	6.32041	6.33887	6.35733	6.37579	6.39424	6.4127	6.43116	6.44962	6.46808	6.48654	6.505	6.6896	0
9090	9.09	-28.621	-41.386	-30.86	-10.345	5.59034	5.78324	5.97615	6.16906	6.36196	6.38125	6.40054	6.41983	6.43912	6.45841	6.4777	6.49699	6.51629	6.53558	6.55487	6.74777	0
9110	9.11	-28.633	-40.248	-31.055	-10.463	5.58237	5.7673	5.95223	6.13716	6.3221	6.34059	6.35908	6.37758	6.39607	6.41456	6.43306	6.45155	6.47004	6.48854	6.50703	6.69196	0
9130	9.13	-28.65	-41.12	-30.886	-10.533	5.57764	5.75784	5.93804	6.11824	6.29845	6.31647	6.33449	6.35251	6.37053	6.38855	6.40657	6.42459	6.44261	6.46063	6.47865	6.65885	0
9150	9.15	-28.761	-41.265	-30.872	-10.587	5.57399	5.75054	5.9271	6.10365	6.2802	6.29786	6.31551	6.33317	6.35083	6.36848	6.38614	6.40379	6.42145	6.4391	6.45676	6.63331	0
9170	9.17	-28.827	-41.971	-30.784	-10.778	5.56108	5.72473	5.88838	6.05203	6.21568	6.23204	6.24841	6.26477	6.28114	6.2975	6.31387	6.33023	6.3466	6.36296	6.37933	6.54297	0
9190	9.19	-29.015	-41.292	-31.77	-10.527	5.57804	5.75865	5.93926	6.11987	6.30047	6.31854	6.3366	6.35466	6.37272	6.39078	6.40884	6.4269	6.44496	6.46302	6.48108	6.66169	0
9210	9.21	-29.2	-42.591	-31.003	-10.597	5.57331	5.74919	5.92507	6.10095	6.27683	6.29441	6.312	6.32959	6.34718	6.36476	6.38235	6.39994	6.41753	6.43512	6.4527	6.62858	0
9230	9.23	-29.304	-41.489	-31.736	-10.716	5.56527	5.73311	5.90095	6.06879	6.23662	6.25341	6.27019	6.28697	6.30376	6.32054	6.33733	6.35411	6.37089	6.38768	6.40446	6.5723	0
9250	9.25	-29.199	-42.552	-30.723	-11.395	5.51939	5.64135	5.76331	5.88527	6.00723	6.01943	6.03162	6.04382	6.05601	6.06821	6.08041	6.0926	6.1048	6.11699	6.12919	6.25115	0
9270	9.27	-29.159	-41.782	-31.872	-10.905	5.5525	5.70757	5.86264	6.0177	6.17277	6.18828	6.20379	6.21929	6.2348	6.25031	6.26581	6.28132	6.29683	6.31233	6.32784	6.48291	0
9290	9.29	-29.103	-41.63	-30.861	-10.846	5.55649	5.71554	5.8746	6.03365	6.1927	6.20861	6.22451	6.24042	6.25633	6.27223	6.28814	6.30404	6.31995	6.33585	6.35176	6.51081	0
9310	9.31	-28.992	-42.269	-30.599	-10.767	5.56183	5.72622	5.89061	6.055	6.21939	6.23583	6.25227	6.26871	6.28515	6.30159	6.31803	6.33447	6.35091	6.36735	6.38379	6.54818	0
9330	9.33	-28.828	-42.086	-30.717	-10.655	5.56939	5.74135	5.91331	6.08527	6.25723	6.27443	6.29162	6.30882	6.32601	6.34321	6.36041	6.3776	6.3948	6.41199	6.42919	6.60115	0
9350	9.35	-28.679	-41.621	-30.71	-10.704	5.56608	5.73473	5.90338	6.07203	6.24068	6.25754	6.27441	6.29127	6.30814	6.325	6.34187	6.35873	6.3756	6.39246	6.40933	6.57797	0
9370	9.37	-28.663	-41.251	-30.701	-10.313	5.5925	5.78757	5.98264	6.1777	6.37277	6.39228	6.41179	6.43129	6.4508	6.47031	6.48981	6.50932	6.52883	6.54833	6.56784	6.76291	0
9390	9.39	-28.716	-41.321	-31.023	-10.472	5.58176	5.76608	5.95041	6.13473	6.31906	6.33749	6.35592	6.37435	6.39279	6.41122	6.42965	6.44808	6.46651	6.48495	6.50338	6.6877	0
9410	9.41	-28.737	-41.912	-30.798	-10.535	5.5775	5.75757	5.93764	6.1177	6.29777	6.31578	6.33379	6.35179	6.3698	6.38781	6.40581	6.42382	6.44183	6.45983	6.47784	6.65791	0
9430	9.43	-28.883	-41.276	-30.603	-11.113	5.53845	5.67946	5.82047	5.96149	6.1025	6.1166	6.1307	6.14481	6.15891	6.17301	6.18711	6.20121	6.21531	6.22941	6.24351	6.38453	0
9450	9.45	-28.994	-41.751	-31.031	-11.032	5.54392	5.69041	5.83689	5.98338	6.12987	6.14451	6.15916	6.17381	6.18846	6.20311	6.21776	6.23241	6.24706	6.2617	6.27635	6.42284	0
9470	9.47	-29.134	-41.258	-31.262	-11.068	5.54149	5.68554	5.8296	5.97365	6.1177	6.13211	6.14651	6.16092	6.17533	6.18973	6.20414	6.21854	6.23295	6.24735	6.26176	6.40581	0
9490	9.49	-29.297	-41.792	-31.516	-11.297	5.52601	5.6546	5.78318	5.91176	6.04034	6.0532	6.06606	6.07891	6.09177	6.10463	6.11749	6.13035	6.1432	6.15606	6.16892	6.2975	0
9510	9.51	-29.421	-42.789	-31.691	-11.091	5.53993	5.68243	5.82493	5.96743	6.10993	6.12418	6.13843	6.15268	6.16693	6.18118	6.19543	6.20968	6.22393	6.23818	6.25243	6.39493	0
9530	9.53	-29.428	-42.619	-31.957	-10.921	5.55142	5.70541	5.85939	6.01338	6.16737	6.18276	6.19816	6.21356	6.22896	6.24436	6.25976	6.27516	6.29056	6.30595	6.32135	6.47534	0
9550	9.55	-29.403	-42.302	-31.368	-11.178	5.53406	5.67068	5.8073	5.94392	6.08054	6.0942	6.10787	6.12153	6.13519	6.14885	6.16251	6.17618	6.18984	6.2035	6.21716	6.35379	0
9570	9.57	-29.4	-43.04	-30.508	-10.833	5.55737	5.7173	5.87723	6.03716	6.1971	6.21309	6.22908	6.24508	6.26107	6.27706	6.29306	6.30905	6.32504	6.34104	6.35703	6.51696	0
9590	9.59	-29.322	-42.35	-31.363	-10.75	5.56297	5.72851	5.89406	6.0596	6.22514	6.24169	6.25824	6.2748	6.29135	6.30791	6.32446	6.34101	6.35757	6.37412	6.39068	6.55622	0
9610	9.61	-29.265	-41.384	-30.952	-10.818	5.55838	5.71933	5.88027	6.04122	6.20216	6.21826	6.23435	6.25045	6.26654	6.28264	6.29873	6.31483	6.33092	6.34701	6.36311	6.52406	0
9630	9.63	-29.287	-42.135	-31.037	-10.949	5.54953	5.70162	5.85372	6.00581	6.15791	6.17312	6.18833	6.20354	6.21874	6.23395	6.24916	6.26437	6.27958	6.29479	6.31	6.4621	0
9650	9.65	-29.207	-42.511	-31.078	-11.208	5.53203	5.66662	5.80122	5.93581	6.07041	6.08387	6.09733	6.11079	6.12424	6.1377	6.15116	6.16462	6.17808	6.19154	6.205	6.3396	0
9670	9.67	-29.193	-42.589	-31.076	-10.636	5.57068	5.74392	5.91716	6.09041	6.26365	6.28097	6.2983	6.31562	6.33295	6.35027	6.3676	6.38492	6.40224	6.41957	6.43689	6.61014	0
9690	9.69	-29.257	-41.895	-31.903	-10.767	5.56183	5.72622	5.89061	6.055	6.21939	6.23583	6.25227	6.26871	6.28515	6.30159	6.31803	6.33447	6.35091	6.36735	6.38379	6.54818	0
9710	9.71	-29.329	-42.7	-31.089	-11.114	5.53838	5.67933	5.82027	5.96122	6.10216	6.11626	6.13035	6.14445	6.15854	6.17264	6.18673	6.20083	6.21492	6.22901	6.24311	6.38406	0
9730	9.73	-29.375	-41.563	-31.346	-11.131	5.53723	5.67703	5.81683	5.95662	6.09642	6.1104	6.12438	6.13836	6.15234	6.16632	6.1803	6.19428	6.20826	6.22224	6.23622	6.37601	0
9750	9.75	-29.5	-41.602	-32.092	-11.174	5.53433	5.67122	5.80811	5.945	6.08189	6.09558	6.10927	6.12296	6.13665	6.15034	6.16403	6.17772	6.19141	6.2051	6.21879	6.35568	0
9770	9.77	-29.769	-42.295	-31.414	-11.407	5.51858	5.63973	5.76088	5.88203	6.00318	6.01529	6.02741	6.03952	6.05164	6.06375	6.07587	6.08798	6.1001	6.11221	6.12433	6.24547	0
9790	9.79	-29.462	-42.522	-31.724	-10.584	5.57419	5.75095	5.9277	6.10446	6.28122	6.29889	6.31657	6.33424	6.35192	6.3696	6.38727	6.40495	6.42262	6.4403	6.45797	6.63473	0
9810	9.81	-29.453	-42.621	-30.564	-11.031	5.54399	5.69054	5.8371	5.98365	6.1302	6.14486	6.15951	6.17417	6.18883	6.20348	6.21814	6.23279	6.24745	6.2621	6.27676	6.42331	0
9830	9.83	-29.741	-43.49	-31.565	-10.837	5.5571	5.71676	5.87642	6.03608	6.19574	6.21171	6.22768	6.24364	6.25961	6.27558	6.29154	6.30751	6.32347	6.33944	6.35541	6.51507	0
9850	9.85	-29.99	-42.463	-32.859	-10.897	5.55304	5.70865	5.86426	6.01987	6.17547	6.19104	6.2066	6.22216	6.23772	6.25328	6.26884	6.2844	6.29996	6.31552	6.33108	6.48669	0
9870	9.87	-29.991	-42.808	-32.971	-11.229	5.53061	5.66379	5.79696	5.93014	6.06331	6.07663	6.08995	6.10326	6.11658	6.1299	6.14322	6.15654	6.16985	6.18317	6.19649	6.32966	0
9890	9.89	-29.938	-42.536	-32.535	-11.187	5.53345	5.66946	5.80547	5.94149	6.0775	6.0911	6.1047	6.11831	6.13191	6.14551	6.15911	6.17271	6.18631	6.19991	6.21351	6.34953	0
9910	9.91	-29.768	-41.857	-31.79	-11.533	5.51007	5.6227	5.73534	5.84797	5.96061	5.97187	5.98314	5.9944	6.00566	6.01693	6.02819	6.03945	6.05072	6.06198	6.07324	6.18588	0
9930	9.93	-29.761	-42.333	-31.72	-10.944	5.54987	5.7023	5.85473	6.00716	6.1596	6.17484	6.19008	6.20533	6.22057	6.23581	6.25106	6.2663	6.28154	6.29679	6.31203	6.46446	0
9950	9.95	-29.707	-42.019	-31.393	-10.83	5.55757	5.7177	5.87784	6.03797	6.19811	6.21412	6.23014	6.24615	6.26216	6.27818	6.29419	6.3102	6.32622	6.34223	6.35824	6.51838	0
9970	9.97	-29.857	-42.298	-32.348	-11.033	5.54385	5.69027	5.83669	5.98311	6.12953	6.14417	6.15881	6.17345	6.1881	6.20274	6.21738	6.23202	6.24666	6.26131	6.27595	6.42237	0
9990	9.99	-30.031	-43.232	-31.641	-11.716	5.4977	5.59797	5.69824	5.79851	5.89879	5.90881	5.91884	5.92887	5.93889	5.94892	5.95895	5.96897	5.979	5.98903	5.99906	6.09933	0
10010	10.01	-30.588	-42.988	-33.027	-11.862	5.48784	5.57824	5.66865	5.75906	5.84946	5.8585	5.86754	5.87658	5.88562	5.89466	5.9037	5.91274	5.92179	5.93083	5.93987	6.03027	0
10030	10.03	-30.617	-44.329	-32.22	-11.551	5.50885	5.62027	5.73169	5.84311	5.95453	5.96567	5.97681	5.98795	5.9991	6.01024	6.02138	6.03252	6.04366	6.05481	6.06595	6.17737	0
10050	10.05	-30.539	-44.279	-31.983	-11.655	5.50183	5.60622	5.71061	5.815	5.91939	5.92983	5.94027	5.95071	5.96115	5.97159	5.98203	5.99247	6.00291	6.01335	6.02379	6.12818	0
10070	10.07	-30.678	-44.038	-32.322	-11.377	5.52061	5.64379	5.76696	5.89014	6.01331	6.02563	6.03795	6.05026	6.06258	6.0749	6.08722	6.09954	6.11185	6.12417	6.13649	6.25966	0
10090	10.09	-30.953	-45.076	-33.243	-11.76	5.49473	5.59203	5.68933	5.78662	5.88392	5.89365	5.90338	5.91311	5.92284	5.93257	5.9423	5.95203	5.96176	5.97149	5.98122	6.07851	0
10110	10.11	-30.792	-43.156	-34.414	-11.34	5.52311	5.64879	5.77446	5.90014	6.02581	6.03838	6.05095	6.06351	6.07608	6.08865	6.10122	6.11379	6.12635	6.13892	6.15149	6.27716	0
10130	10.13	-30.624	-43.734	-32.371	-11.631	5.50345	5.60946	5.71547	5.82149	5.9275	5.9381	5.9487	5.95931	5.96991	5.98051	5.99111	6.00171	6.01231	6.02291	6.03351	6.13953	0
10150	10.15	-30.811	-44.572	-32.863	-11.466	5.5146	5.63176	5.74892	5.86608	5.98324	5.99496	6.00668	6.01839	6.03011	6.04183	6.05354	6.06526	6.07697	6.08869	6.10041	6.21757	0
10170	10.17	-31.072	-44.128	-33.269	-11.678	5.50027	5.60311	5.70595	5.80879	5.91162	5.92191	5.93219	5.94247	5.95276	5.96304	5.97333	5.98361	5.99389	6.00418	6.01446	6.1173	0
10190	10.19	-31.261	-45.006	-33.486	-11.782	5.49324	5.58906	5.68487	5.78068	5.87649	5.88607	5.89565	5.90523	5.91481	5.92439	5.93397	5.94356	5.95314	5.96272	5.9723	6.06811	0
10210	10.21	-31.272	-45.622	-32.3	-12.196	5.46527	5.53311	5.60095	5.66879	5.73662	5.74341	5.75019	5.75697	5.76376	5.77054	5.77733	5.78411	5.79089	5.79768	5.80446	5.8723	0
10230	10.23	-31.006	-44.015	-33.019	-12.35	5.45487	5.5123	5.56973	5.62716	5.6846	5.69034	5.69608	5.70183	5.70757	5.71331	5.71906	5.7248	5.73054	5.73629	5.74203	5.79946	0
10250	10.25	-30.98	-44.521	-32.435	-12.089	5.4725	5.54757	5.62264	5.6977	5.77277	5.78028	5.78779	5.79529	5.8028	5.81031	5.81781	5.82532	5.83283	5.84033	5.84784	5.92291	0
10270	10.27	-30.99	-43.808	-33.025	-11.89	5.48595	5.57446	5.66297	5.75149	5.84	5.84885	5.8577	5.86656	5.87541	5.88426	5.89311	5.90196	5.91081	5.91966	5.92851	6.01703	0
10290	10.29	-31.005	-44.431	-33.389	-11.965	5.48088	5.56433	5.64777	5.73122	5.81466	5.82301	5.83135	5.8397	5.84804	5.85639	5.86473	5.87308	5.88142	5.88976	5.89811	5.98156	0
10310	10.31	-31.134	-44.49	-33.126	-12.064	5.47419	5.55095	5.6277	5.70446	5.78122	5.78889	5.79657	5.80424	5.81192	5.8196	5.82727	5.83495	5.84262	5.8503	5.85797	5.93473	0
10330	10.33	-31.619	-45.598	-32.801	-12.656	5.43419	5.47095	5.5077	5.54446	5.58122	5.58489	5.58857	5.59224	5.59592	5.5996	5.60327	5.60695	5.61062	5.6143	5.61797	5.65473	0
10350	10.35	-31.941	-45.464	-33.531	-12.294	5.45865	5.51987	5.58108	5.6423	5.70351	5.70964	5.71576	5.72188	5.728	5.73412	5.74024	5.74637	5.75249	5.75861	5.76473	5.82595	0
10370	10.37	-31.989	-46.21	-33.5	-12.319	5.45696	5.51649	5.57601	5.63554	5.69507	5.70102	5.70697	5.71293	5.71888	5.72483	5.73079	5.73674	5.74269	5.74864	5.7546	5.81412	0
10390	10.39	-31.812	-45.92	-33.812	-12.131	5.46966	5.54189	5.61412	5.68635	5.75858	5.76581	5.77303	5.78025	5.78747	5.7947	5.80192	5.80914	5.81637	5.82359	5.83081	5.90304	0
10410	10.41	-31.638	-45.168	-33.963	-12.254	5.46135	5.52527	5.58919	5.65311	5.71703	5.72342	5.72981	5.7362	5.7426	5.74899	5.75538	5.76177	5.76816	5.77456	5.78095	5.84487	0
10430	10.43	-31.664	-44.66	-33.498	-12.642	5.43514	5.47284	5.51054	5.54824	5.58595	5.58972	5.59349	5.59726	5.60103	5.6048	5.60857	5.61234	5.61611	5.61988	5.62365	5.66135	0
10450	10.45	-31.62	-44.48	-32.935	-12.829	5.4225	5.44757	5.47264	5.4977	5.52277	5.52528	5.52779	5.53029	5.5328	5.53531	5.53781	5.54032	5.54283	5.54533	5.54784	5.57291	0
10470	10.47	-31.717	-44.956	-34.496	-12.39	5.45216	5.50689	5.56162	5.61635	5.67108	5.67656	5.68203	5.6875	5.69297	5.69845	5.70392	5.70939	5.71487	5.72034	5.72581	5.78054	0
10490	10.49	-31.778	-45.276	-34.25	-12.48	5.44608	5.49473	5.54338	5.59203	5.64068	5.64554	5.65041	5.65527	5.66014	5.665	5.66987	5.67473	5.6796	5.68446	5.68933	5.73797	0
10510	10.51	-31.957	-45.41	-33.613	-12.503	5.44453	5.49162	5.53872	5.58581	5.63291	5.63762	5.64233	5.64704	5.65174	5.65645	5.66116	5.66587	5.67058	5.67529	5.68	5.7271	0
10530	10.53	-32.041	-45.463	-34.255	-12.374	5.45324	5.50906	5.56487	5.62068	5.67649	5.68207	5.68765	5.69323	5.69881	5.70439	5.70997	5.71556	5.72114	5.72672	5.7323	5.78811	0
10550	10.55	-32.138	-45.955	-33.505	-12.706	5.43081	5.46419	5.49757	5.53095	5.56433	5.56766	5.571	5.57434	5.57768	5.58101	5.58435	5.58769	5.59103	5.59437	5.5977	5.63108	0
10570	10.57	-32.17	-45.328	-34.306	-12.724	5.4296	5.46176	5.49392	5.52608	5.55824	5.56146	5.56468	5.56789	5.57111	5.57433	5.57754	5.58076	5.58397	5.58719	5.59041	5.62257	0
10590	10.59	-32.193	-46.409	-33.29	-12.856	5.42068	5.44392	5.46716	5.49041	5.51365	5.51597	5.5183	5.52062	5.52295	5.52527	5.5276	5.52992	5.53224	5.53457	5.53689	5.56014	0
10610	10.61	-32.436	-47.807	-33.44	-12.044	5.47554	5.55365	5.63176	5.70987	5.78797	5.79579	5.8036	5.81141	5.81922	5.82703	5.83484	5.84265	5.85046	5.85827	5.86608	5.94419	0
10630	10.63	-32.449	-46.855	-33.921	-12.605	5.43764	5.47784	5.51804	5.55824	5.59845	5.60247	5.60649	5.61051	5.61453	5.61855	5.62257	5.62659	5.63061	5.63463	5.63865	5.67885	0
10650	10.65	-32.519	-45.974	-34.098	-13.158	5.40027	5.40311	5.40595	5.40879	5.41162	5.41191	5.41219	5.41247	5.41276	5.41304	5.41333	5.41361	5.41389	5.41418	5.41446	5.4173	0
10670	10.67	-32.758	-47.099	-34.522	-13.009	5.41034	5.42324	5.43615	5.44906	5.46196	5.46325	5.46454	5.46583	5.46712	5.46841	5.4697	5.47099	5.47229	5.47358	5.47487	5.48777	0
10690	10.69	-32.926	-48.029	-34.525	-12.83	5.42243	5.44743	5.47243	5.49743	5.52243	5.52493	5.52743	5.52993	5.53243	5.53493	5.53743	5.53993	5.54243	5.54493	5.54743	5.57243	0
10710	10.71	-33.084	-48.582	-34.336	-13.021	5.40953	5.42162	5.43372	5.44581	5.45791	5.45912	5.46033	5.46154	5.46274	5.46395	5.46516	5.46637	5.46758	5.46879	5.47	5.4821	0
10730	10.73	-33.095	-48.042	-34.845	-12.825	5.42277	5.44811	5.47345	5.49879	5.52412	5.52666	5.52919	5.53172	5.53426	5.53679	5.53933	5.54186	5.54439	5.54693	5.54946	5.5748	0
10750	10.75	-33.138	-47.777	-35.017	-13.079	5.40561	5.41379	5.42196	5.43014	5.43831	5.43913	5.43995	5.44076	5.44158	5.4424	5.44322	5.44404	5.44485	5.44567	5.44649	5.45466	0
10770	10.77	-33.229	-46.908	-35.222	-12.863	5.4202	5.44297	5.46574	5.48851	5.51129	5.51356	5.51584	5.51812	5.52039	5.52267	5.52495	5.52722	5.5295	5.53178	5.53406	5.55683	0
10790	10.79	-33.264	-47.905	-35.427	-12.698	5.43135	5.46527	5.49919	5.53311	5.56703	5.57042	5.57381	5.5772	5.5806	5.58399	5.58738	5.59077	5.59416	5.59756	5.60095	5.63487	0
10810	10.81	-33.389	-47.49	-34.934	-13.264	5.39311	5.38879	5.38446	5.38014	5.37581	5.37538	5.37495	5.37451	5.37408	5.37365	5.37322	5.37279	5.37235	5.37192	5.37149	5.36716	0
10830	10.83	-33.633	-47.8	-35.636	-13.301	5.39061	5.38379	5.37696	5.37014	5.36331	5.36263	5.36195	5.36126	5.36058	5.3599	5.35922	5.35854	5.35785	5.35717	5.35649	5.34966	0
10850	10.85	-33.783	-48.366	-35.75	-13.272	5.39257	5.3877	5.38284	5.37797	5.37311	5.37262	5.37214	5.37165	5.37116	5.37068	5.37019	5.3697	5.36922	5.36873	5.36824	5.36338	0
10870	10.87	-33.985	-47.985	-35.787	-13.775	5.35858	5.31973	5.28088	5.24203	5.20318	5.19929	5.19541	5.19152	5.18764	5.18375	5.17987	5.17598	5.1721	5.16821	5.16433	5.12547	0
10890	10.89	-34.037	-48.788	-35.978	-13.524	5.37554	5.35365	5.33176	5.30987	5.28797	5.28579	5.2836	5.28141	5.27922	5.27703	5.27484	5.27265	5.27046	5.26827	5.26608	5.24419	0
10910	10.91	-34.086	-48.689	-35.981	-13.976	5.345	5.29257	5.24014	5.1877	5.13527	5.13003	5.12479	5.11954	5.1143	5.10906	5.10381	5.09857	5.09333	5.08808	5.08284	5.03041	0
10930	10.93	-34.114	-48.716	-36.238	-13.236	5.395	5.39257	5.39014	5.3877	5.38527	5.38503	5.38479	5.38454	5.3843	5.38406	5.38381	5.38357	5.38333	5.38308	5.38284	5.38041	0
10950	10.95	-33.948	-48.555	-35.232	-13.005	5.41061	5.42379	5.43696	5.45014	5.46331	5.46463	5.46595	5.46726	5.46858	5.4699	5.47122	5.47254	5.47385	5.47517	5.47649	5.48966	0
10970	10.97	-33.724	-47.152	-36.088	-13.539	5.37453	5.35162	5.32872	5.30581	5.28291	5.28062	5.27833	5.27604	5.27374	5.27145	5.26916	5.26687	5.26458	5.26229	5.26	5.2371	0
10990	10.99	-33.625	-48.1	-35.369	-13.175	5.39912	5.40081	5.4025	5.40419	5.40588	5.40605	5.40622	5.40639	5.40656	5.40672	5.40689	5.40706	5.40723	5.4074	5.40757	5.40926	0
11010	11.01	-33.717	-47.662	-35.288	-13.853	5.35331	5.30919	5.26507	5.22095	5.17683	5.17241	5.168	5.16359	5.15918	5.15476	5.15035	5.14594	5.14153	5.13712	5.1327	5.08858	0
11030	11.03	-33.72	-48.168	-36	-13.309	5.39007	5.3827	5.37534	5.36797	5.36061	5.35987	5.35914	5.3584	5.35766	5.35693	5.35619	5.35545	5.35472	5.35398	5.35324	5.34588	0
11050	11.05	-33.597	-47.724	-35.05	-13.862	5.3527	5.30797	5.26324	5.21851	5.17379	5.16931	5.16484	5.16037	5.15589	5.15142	5.14695	5.14247	5.138	5.13353	5.12906	5.08433	0
11070	11.07	-33.651	-47.681	-35.107	-13.374	5.38568	5.37392	5.36216	5.35041	5.33865	5.33747	5.3363	5.33512	5.33395	5.33277	5.3316	5.33042	5.32924	5.32807	5.32689	5.31514	0
11090	11.09	-33.565	-47.443	-35.551	-13.357	5.38683	5.37622	5.36561	5.355	5.34439	5.34333	5.34227	5.34121	5.34015	5.33909	5.33803	5.33697	5.33591	5.33485	5.33379	5.32318	0
11110	11.11	-33.683	-47.821	-35.437	-13.345	5.38764	5.37784	5.36804	5.35824	5.34845	5.34747	5.34649	5.34551	5.34453	5.34355	5.34257	5.34159	5.34061	5.33963	5.33865	5.32885	0
11130	11.13	-34.078	-48.761	-35.107	-13.497	5.37737	5.3573	5.33723	5.31716	5.2971	5.29509	5.29308	5.29108	5.28907	5.28706	5.28506	5.28305	5.28104	5.27904	5.27703	5.25696	0
11150	11.15	-34.278	-47.935	-36.59	-13.842	5.35406	5.31068	5.2673	5.22392	5.18054	5.1762	5.17187	5.16753	5.16319	5.15885	5.15451	5.15018	5.14584	5.1415	5.13716	5.09379	0
11170	11.17	-34.499	-48.267	-36.858	-13.598	5.37054	5.34365	5.31676	5.28987	5.26297	5.26029	5.2576	5.25491	5.25222	5.24953	5.24684	5.24415	5.24146	5.23877	5.23608	5.20919	0
11190	11.19	-34.246	-48.789	-35.875	-13.614	5.36946	5.34149	5.31351	5.28554	5.25757	5.25477	5.25197	5.24918	5.24638	5.24358	5.24079	5.23799	5.23519	5.23239	5.2296	5.20162	0
11210	11.21	-33.771	-46.714	-35.549	-14.017	5.34223	5.28703	5.23183	5.17662	5.12142	5.1159	5.11038	5.10486	5.09934	5.09382	5.0883	5.08278	5.07726	5.07174	5.06622	5.01101	0
11230	11.23	-33.498	-47.227	-35.162	-13.448	5.38068	5.36392	5.34716	5.33041	5.31365	5.31197	5.3103	5.30862	5.30695	5.30527	5.3036	5.30192	5.30024	5.29857	5.29689	5.28014	0
11250	11.25	-33.539	-47.389	-35.068	-13.927	5.34831	5.29919	5.25007	5.20095	5.15183	5.14691	5.142	5.13709	5.13218	5.12726	5.12235	5.11744	5.11253	5.10762	5.1027	5.05358	0
11270	11.27	-33.898	-48.174	-35.026	-13.692	5.36419	5.33095	5.2977	5.26446	5.23122	5.22789	5.22457	5.22124	5.21792	5.2146	5.21127	5.20795	5.20462	5.2013	5.19797	5.16473	0
11290	11.29	-34.226	-47.387	-36.441	-14.18	5.33122	5.265	5.19879	5.13257	5.06635	5.05973	5.05311	5.04649	5.03987	5.03324	5.02662	5.02	5.01338	5.00676	5.00014	4.93392	0
11310	11.31	-34.699	-48.359	-36.266	-14	5.34338	5.28933	5.23527	5.18122	5.12716	5.12176	5.11635	5.11095	5.10554	5.10014	5.09473	5.08933	5.08392	5.07851	5.07311	5.01906	0
11330	11.33	-35.39	-50.451	-36.361	-14.429	5.31439	5.23135	5.14831	5.06527	4.98223	4.97393	4.96562	4.95732	4.94901	4.94071	4.93241	4.9241	4.9158	4.90749	4.89919	4.81615	0
11350	11.35	-36.276	-51.344	-36.992	-14.764	5.29176	5.18608	5.08041	4.97473	4.86906	4.85849	4.84792	4.83735	4.82679	4.81622	4.80565	4.79508	4.78451	4.77395	4.76338	4.6577	0
11370	11.37	-36.975	-52.558	-38.638	-15.372	5.25068	5.10392	4.95716	4.81041	4.66365	4.64897	4.6343	4.61962	4.60495	4.59027	4.5756	4.56092	4.54624	4.53157	4.51689	4.37014	0
11390	11.39	-37.199	-52.279	-38.462	-15.339	5.25291	5.10838	4.96385	4.81933	4.6748	4.66035	4.64589	4.63144	4.61699	4.60254	4.58808	4.57363	4.55918	4.54472	4.53027	4.38574	0
11410	11.41	-36.898	-51.443	-38.222	-15.629	5.23331	5.06919	4.90507	4.74095	4.57683	4.56041	4.544	4.52759	4.51118	4.49476	4.47835	4.46194	4.44553	4.42912	4.4127	4.24858	0
11430	11.43	-36.421	-51.291	-37.455	-14.9	5.28257	5.1677	5.05284	4.93797	4.82311	4.81162	4.80014	4.78865	4.77716	4.76568	4.75419	4.7427	4.73122	4.71973	4.70824	4.59338	0
11450	11.45	-35.802	-50.474	-37.314	-14.75	5.2927	5.18797	5.08324	4.97851	4.87379	4.86331	4.85284	4.84237	4.83189	4.82142	4.81095	4.80047	4.79	4.77953	4.76906	4.66433	0
11470	11.47	-35.394	-49.953	-36.392	-14.684	5.29716	5.19689	5.09662	4.99635	4.89608	4.88606	4.87603	4.866	4.85597	4.84595	4.83592	4.82589	4.81587	4.80584	4.79581	4.69554	0
11490	11.49	-34.989	-49.036	-36.094	-14.508	5.30906	5.22068	5.1323	5.04392	4.95554	4.9467	4.93787	4.92903	4.92019	4.91135	4.90251	4.89368	4.88484	4.876	4.86716	4.77879	0
11510	11.51	-34.552	-49.004	-35.743	-14.151	5.33318	5.26892	5.20466	5.14041	5.07615	5.06972	5.0633	5.05687	5.05045	5.04402	5.0376	5.03117	5.02474	5.01832	5.01189	4.94764	0
11530	11.53	-34.182	-48.061	-35.613	-14.056	5.3396	5.28176	5.22392	5.16608	5.10824	5.10246	5.09668	5.09089	5.08511	5.07933	5.07354	5.06776	5.06197	5.05619	5.05041	4.99257	0
11550	11.55	-34.083	-47.642	-35.141	-14.013	5.3425	5.28757	5.23264	5.1777	5.12277	5.11728	5.11179	5.10629	5.1008	5.09531	5.08981	5.08432	5.07883	5.07333	5.06784	5.01291	0
11570	11.57	-34.395	-48.807	-35.822	-13.7	5.36365	5.32987	5.29608	5.2623	5.22851	5.22514	5.22176	5.21838	5.215	5.21162	5.20824	5.20487	5.20149	5.19811	5.19473	5.16095	0
11590	11.59	-35.083	-50.042	-36.256	-14.135	5.33426	5.27108	5.20791	5.14473	5.08156	5.07524	5.06892	5.0626	5.05629	5.04997	5.04365	5.03733	5.03101	5.0247	5.01838	4.9552	0
11610	11.61	-36.135	-51.022	-37.276	-15.097	5.26926	5.14108	5.01291	4.88473	4.75656	4.74374	4.73092	4.7181	4.70529	4.69247	4.67965	4.66683	4.65401	4.6412	4.62838	4.5002	0
11630	11.63	-38.016	-54.349	-39.002	-15.514	5.24108	5.08473	4.92838	4.77203	4.61568	4.60004	4.58441	4.56877	4.55314	4.5375	4.52187	4.50623	4.4906	4.47496	4.45933	4.30297	0
11650	11.65	-40.308	-56.71	-41.964	-17.101	5.13385	4.87027	4.60669	4.34311	4.07953	4.05317	4.02681	4.00045	3.9741	3.94774	3.92138	3.89502	3.86866	3.84231	3.81595	3.55237	0
11670	11.67	-42.171	-58.513	-43.311	-18.155	5.06264	4.72784	4.39304	4.05824	3.72345	3.68997	3.65649	3.62301	3.58953	3.55605	3.52257	3.48909	3.45561	3.42213	3.38865	3.05385	0
11690	11.69	-43.559	-61.415	-44.773	-18.304	5.05257	4.7077	4.36284	4.01797	3.67311	3.63862	3.60414	3.56965	3.53516	3.50068	3.46619	3.4317	3.39722	3.36273	3.32824	2.98338	0
11710	11.71	-44.165	-61.572	-45.988	-19.141	4.99601	4.5946	4.19318	3.79176	3.39034	3.3502	3.31006	3.26991	3.22977	3.18963	3.14949	3.10935	3.0692	3.02906	2.98892	2.5875	0
11730	11.73	-44.391	-61.812	-46.352	-18.817	5.01791	4.63838	4.25885	3.87933	3.4998	3.46185	3.42389	3.38594	3.34799	3.31004	3.27208	3.23413	3.19618	3.15822	3.12027	2.74074	0
11750	11.75	-44.414	-61.917	-45.818	-18.813	5.01818	4.63892	4.25966	3.88041	3.50115	3.46322	3.4253	3.38737	3.34945	3.31152	3.2736	3.23567	3.19774	3.15982	3.12189	2.74264	0
11770	11.77	-44.437	-62.342	-45.989	-19.257	4.98818	4.57892	4.16966	3.76041	3.35115	3.31022	3.2693	3.22837	3.18745	3.14652	3.1056	3.06467	3.02374	2.98282	2.94189	2.53264	0
11790	11.79	-44.55	-63.168	-46.611	-18.702	5.02568	4.65392	4.28216	3.91041	3.53865	3.50147	3.4643	3.42712	3.38995	3.35277	3.3156	3.27842	3.24124	3.20407	3.16689	2.79514	0
11810	11.81	-44.735	-62.484	-46.948	-19.189	4.99277	4.58811	4.18345	3.77879	3.37412	3.33366	3.29319	3.25272	3.21226	3.17179	3.13133	3.09086	3.05039	3.00993	2.96946	2.5648	0
11830	11.83	-44.869	-63.954	-46.528	-19.359	4.98129	4.56514	4.14899	3.73284	3.31669	3.27508	3.23346	3.19185	3.15023	3.10862	3.067	3.02539	2.98377	2.94216	2.90054	2.48439	0
11850	11.85	-44.942	-62.601	-46.51	-19.395	4.97885	4.56027	4.14169	3.72311	3.30453	3.26267	3.22081	3.17895	3.1371	3.09524	3.05338	3.01152	2.96966	2.92781	2.88595	2.46737	0
11870	11.87	-44.875	-63.971	-46.541	-18.866	5.0146	4.63176	4.24892	3.86608	3.48324	3.44496	3.40668	3.36839	3.33011	3.29183	3.25354	3.21526	3.17697	3.13869	3.10041	2.71757	0
11890	11.89	-44.711	-63.402	-46.17	-19.235	4.98966	4.58189	4.17412	3.76635	3.35858	3.31781	3.27703	3.23625	3.19547	3.1547	3.11392	3.07314	3.03237	2.99159	2.95081	2.54304	0
11910	11.91	-44.684	-63.059	-46.031	-18.982	5.00676	4.61608	4.22541	3.83473	3.44406	3.40499	3.36592	3.32685	3.28779	3.24872	3.20965	3.17058	3.13151	3.09245	3.05338	2.6627	0
11930	11.93	-44.642	-63.07	-46.789	-19.083	4.99993	4.60243	4.20493	3.80743	3.40993	3.37018	3.33043	3.29068	3.25093	3.21118	3.17143	3.13168	3.09193	3.05218	3.01243	2.61493	0
11950	11.95	-44.528	-62.66	-46.827	-18.826	5.0173	4.63716	4.25703	3.87689	3.49676	3.45874	3.42073	3.38272	3.3447	3.30669	3.26868	3.23066	3.19265	3.15464	3.11662	2.73649	0
11970	11.97	-44.57	-62.701	-46.783	-19.16	4.99473	4.59203	4.18933	3.78662	3.38392	3.34365	3.30338	3.26311	3.22284	3.18257	3.1423	3.10203	3.06176	3.02149	2.98122	2.57851	0
11990	11.99	-44.699	-63.778	-46.592	-19.04	5.00284	4.60824	4.21365	3.81906	3.42446	3.385	3.34554	3.30608	3.26662	3.22716	3.1877	3.14824	3.10879	3.06933	3.02987	2.63527	0
12010	12.01	-44.864	-61.424	-47.296	-19.734	4.95595	4.51446	4.07297	3.63149	3.19	3.14585	3.1017	3.05756	3.01341	2.96926	2.92511	2.88096	2.83681	2.79266	2.74851	2.30703	0
12030	12.03	-45.009	-63.431	-46.978	-19.393	4.97899	4.56054	4.1421	3.72365	3.3052	3.26336	3.22151	3.17967	3.13783	3.09598	3.05414	3.01229	2.97045	2.9286	2.88676	2.46831	0
12050	12.05	-45.24	-63.847	-46.449	-19.513	4.97088	4.54433	4.11777	3.69122	3.26466	3.22201	3.17935	3.1367	3.09404	3.05139	3.00873	2.96608	2.92342	2.88076	2.83811	2.41156	0
12070	12.07	-45.424	-64.686	-46.733	-19.107	4.99831	4.59919	4.20007	3.80095	3.40183	3.36191	3.322	3.28209	3.24218	3.20226	3.16235	3.12244	3.08253	3.04262	3.0027	2.60358	0
12090	12.09	-45.553	-64.407	-47.084	-19.499	4.97183	4.54622	4.12061	3.695	3.26939	3.22683	3.18427	3.14171	3.09915	3.05659	3.01403	2.97147	2.92891	2.88635	2.84379	2.41818	0
12110	12.11	-45.653	-64.432	-47.269	-19.284	4.98635	4.57527	4.16419	3.75311	3.34203	3.30092	3.25981	3.2187	3.1776	3.13649	3.09538	3.05427	3.01316	2.97206	2.93095	2.51987	0
12130	12.13	-45.658	-64.259	-46.919	-19.817	4.95034	4.50324	4.05615	3.60906	3.16196	3.11725	3.07254	3.02783	2.98312	2.93841	2.8937	2.84899	2.80429	2.75958	2.71487	2.26777	0
12150	12.15	-45.62	-64.131	-47.183	-19.595	4.96534	4.53324	4.10115	3.66906	3.23696	3.19375	3.15054	3.10733	3.06412	3.02091	2.9777	2.93449	2.89129	2.84808	2.80487	2.37277	0
12170	12.17	-45.654	-64.229	-47.613	-19.552	4.96824	4.53906	4.10987	3.68068	3.25149	3.20857	3.16565	3.12273	3.07981	3.03689	2.99397	2.95106	2.90814	2.86522	2.8223	2.39311	0
12190	12.19	-45.559	-63.965	-46.761	-19.818	4.95027	4.50311	4.05595	3.60879	3.16162	3.11691	3.07219	3.02747	2.98276	2.93804	2.89333	2.84861	2.80389	2.75918	2.71446	2.2673	0
12210	12.21	-45.512	-64.068	-47.278	-19.596	4.96527	4.53311	4.10095	3.66879	3.23662	3.19341	3.15019	3.10697	3.06376	3.02054	2.97733	2.93411	2.89089	2.84768	2.80446	2.3723	0
12230	12.23	-45.508	-63.796	-46.623	-19.854	4.94784	4.49824	4.04865	3.59906	3.14946	3.1045	3.05954	3.01458	2.96962	2.92466	2.8797	2.83474	2.78979	2.74483	2.69987	2.25027	0
12250	12.25	-45.638	-64.76	-47.614	-19.553	4.96818	4.53892	4.10966	3.68041	3.25115	3.20822	3.1653	3.12237	3.07945	3.03652	2.9936	2.95067	2.90774	2.86482	2.82189	2.39264	0
12270	12.27	-45.837	-64.918	-47.259	-19.845	4.94845	4.49946	4.05047	3.60149	3.1525	3.1076	3.0627	3.01781	2.97291	2.92801	2.88311	2.83821	2.79331	2.74841	2.70351	2.25453	0
12290	12.29	-45.956	-64.638	-47.523	-19.996	4.93824	4.47906	4.01987	3.56068	3.10149	3.05557	3.00965	2.96373	2.91781	2.87189	2.82597	2.78006	2.73414	2.68822	2.6423	2.18311	0
12310	12.31	-45.944	-64.205	-47.914	-20.001	4.93791	4.47838	4.01885	3.55933	3.0998	3.05385	3.00789	2.96194	2.91599	2.87004	2.82408	2.77813	2.73218	2.68622	2.64027	2.18074	0
12330	12.33	-45.857	-64.468	-47.428	-19.98	4.93933	4.48122	4.02311	3.565	3.10689	3.06108	3.01527	2.96946	2.92365	2.87784	2.83203	2.78622	2.74041	2.6946	2.64879	2.19068	0
12350	12.35	-45.741	-64.16	-47.394	-19.845	4.94845	4.49946	4.05047	3.60149	3.1525	3.1076	3.0627	3.01781	2.97291	2.92801	2.88311	2.83821	2.79331	2.74841	2.70351	2.25453	0
12370	12.37	-45.602	-64.245	-47.268	-19.737	4.95574	4.51406	4.07237	3.63068	3.18899	3.14482	3.10065	3.05648	3.01231	2.96814	2.92397	2.87981	2.83564	2.79147	2.7473	2.30561	0
12390	12.39	-45.5	-63.07	-46.836	-19.768	4.95365	4.50987	4.06608	3.6223	3.17851	3.13414	3.08976	3.04538	3.001	2.95662	2.91224	2.86787	2.82349	2.77911	2.73473	2.29095	0
12410	12.41	-45.501	-64.464	-46.474	-19.843	4.94858	4.49973	4.05088	3.60203	3.15318	3.10829	3.06341	3.01852	2.97364	2.92875	2.88387	2.83898	2.7941	2.74921	2.70433	2.25547	0
12430	12.43	-45.717	-64.442	-46.942	-19.896	4.945	4.49257	4.04014	3.5877	3.13527	3.09003	3.04479	2.99954	2.9543	2.90906	2.86381	2.81857	2.77333	2.72808	2.68284	2.23041	0
12450	12.45	-45.943	-64.31	-47.974	-20.021	4.93656	4.47568	4.0148	3.55392	3.09304	3.04695	3.00087	2.95478	2.90869	2.8626	2.81651	2.77043	2.72434	2.67825	2.63216	2.17129	0
12470	12.47	-46.186	-64.328	-47.936	-20.784	4.885	4.37257	3.86014	3.3477	2.83527	2.78403	2.73279	2.68154	2.6303	2.57906	2.52781	2.47657	2.42533	2.37408	2.32284	1.81041	0
12490	12.49	-46.361	-65.156	-48.466	-20.522	4.9027	4.40797	3.91324	3.41851	2.92379	2.87431	2.82484	2.77537	2.72589	2.67642	2.62695	2.57747	2.528	2.47853	2.42906	1.93433	0
12510	12.51	-46.488	-65.087	-47.745	-20.524	4.90257	4.4077	3.91284	3.41797	2.92311	2.87362	2.82414	2.77465	2.72516	2.67568	2.62619	2.5767	2.52722	2.47773	2.42824	1.93338	0
12530	12.53	-46.749	-65.305	-48.325	-20.5	4.90419	4.41095	3.9177	3.42446	2.93122	2.88189	2.83257	2.78324	2.73392	2.6846	2.63527	2.58595	2.53662	2.4873	2.43797	1.94473	0
12550	12.55	-46.867	-65.291	-48.241	-20.922	4.87568	4.35392	3.83216	3.31041	2.78865	2.73647	2.6843	2.63212	2.57995	2.52777	2.4756	2.42342	2.37124	2.31907	2.26689	1.74514	0
12570	12.57	-46.805	-64.108	-49.039	-21.086	4.8646	4.33176	3.79892	3.26608	2.73324	2.67996	2.62668	2.57339	2.52011	2.46683	2.41354	2.36026	2.30697	2.25369	2.20041	1.66757	0
12590	12.59	-46.873	-65.094	-48.693	-20.539	4.90156	4.40568	3.9098	3.41392	2.91804	2.86845	2.81887	2.76928	2.71969	2.6701	2.62051	2.57093	2.52134	2.47175	2.42216	1.92629	0
12610	12.61	-46.863	-65.488	-47.963	-20.849	4.88061	4.36379	3.84696	3.33014	2.81331	2.76163	2.70995	2.65826	2.60658	2.5549	2.50322	2.45154	2.39985	2.34817	2.29649	1.77966	0
12630	12.63	-46.804	-65.255	-48.855	-20.928	4.87527	4.35311	3.83095	3.30879	2.78662	2.73441	2.68219	2.62997	2.57776	2.52554	2.47333	2.42111	2.36889	2.31668	2.26446	1.7423	0
12650	12.65	-46.631	-65.178	-48.747	-20.682	4.89189	4.38635	3.88081	3.37527	2.86973	2.81918	2.76862	2.71807	2.66751	2.61696	2.56641	2.51585	2.4653	2.41474	2.36419	1.85865	0
12670	12.67	-46.475	-64.483	-48.889	-20.292	4.91824	4.43906	3.95987	3.48068	3.00149	2.95357	2.90565	2.85773	2.80981	2.76189	2.71397	2.66606	2.61814	2.57022	2.5223	2.04311	0
12690	12.69	-46.153	-64.647	-47.045	-20.506	4.90379	4.41014	3.91649	3.42284	2.92919	2.87983	2.83046	2.7811	2.73173	2.68237	2.633	2.58364	2.53427	2.48491	2.43554	1.94189	0
12710	12.71	-45.692	-63.843	-47.205	-20.006	4.93757	4.4777	4.01784	3.55797	3.09811	3.05212	3.00614	2.96015	2.91416	2.86818	2.82219	2.7762	2.73022	2.68423	2.63824	2.17838	0
12730	12.73	-45.186	-62.647	-46.737	-20.33	4.91568	4.43392	3.95216	3.47041	2.98865	2.94047	2.8923	2.84412	2.79595	2.74777	2.6996	2.65142	2.60324	2.55507	2.50689	2.02514	0
12750	12.75	-44.557	-61.62	-46.591	-19.478	4.97324	4.54906	4.12487	3.70068	3.27649	3.23407	3.19165	3.14923	3.10681	3.06439	3.02197	2.97956	2.93714	2.89472	2.8523	2.42811	0
12770	12.77	-43.868	-61.026	-45.176	-19.195	4.99237	4.5873	4.18223	3.77716	3.3721	3.33159	3.29108	3.25058	3.21007	3.16956	3.12906	3.08855	3.04804	3.00754	2.96703	2.56196	0
12790	12.79	-43.111	-59.74	-44.494	-19.306	4.98487	4.5723	4.15973	3.74716	3.3346	3.29334	3.25208	3.21083	3.16957	3.12831	3.08706	3.0458	3.00454	2.96329	2.92203	2.50946	0
12810	12.81	-42.188	-58.844	-43.905	-18.195	5.05993	4.72243	4.38493	4.04743	3.70993	3.67618	3.64243	3.60868	3.57493	3.54118	3.50743	3.47368	3.43993	3.40618	3.37243	3.03493	0
12830	12.83	-41.173	-57.955	-42.239	-17.524	5.10527	4.81311	4.52095	4.22879	3.93662	3.90741	3.87819	3.84897	3.81976	3.79054	3.76133	3.73211	3.70289	3.67368	3.64446	3.3523	0
12850	12.85	-40.242	-55.52	-42.301	-17.975	5.0748	4.75216	4.42953	4.10689	3.78426	3.75199	3.71973	3.68747	3.6552	3.62294	3.59068	3.55841	3.52615	3.49389	3.46162	3.13899	0
12870	12.87	-39.675	-54.842	-41.336	-17.058	5.13676	4.87608	4.61541	4.35473	4.09406	4.06799	4.04192	4.01585	3.98979	3.96372	3.93765	3.91158	3.88551	3.85945	3.83338	3.5727	0
12890	12.89	-39.202	-54.516	-40.081	-17.112	5.13311	4.86879	4.60446	4.34014	4.07581	4.04938	4.02295	3.99651	3.97008	3.94365	3.91722	3.89079	3.86435	3.83792	3.81149	3.54716	0
12910	12.91	-38.941	-54.52	-40.493	-16.92	5.14608	4.89473	4.64338	4.39203	4.14068	4.11554	4.09041	4.06527	4.04014	4.015	3.98987	3.96473	3.9396	3.91446	3.88933	3.63797	0
12930	12.93	-39.031	-54.802	-40.114	-16.288	5.18879	4.98014	4.77149	4.56284	4.35419	4.33333	4.31246	4.2916	4.27073	4.24987	4.229	4.20814	4.18727	4.16641	4.14554	3.93689	0
12950	12.95	-39.162	-53.532	-40.497	-16.78	5.15554	4.91365	4.67176	4.42987	4.18797	4.16379	4.1396	4.11541	4.09122	4.06703	4.04284	4.01865	3.99446	3.97027	3.94608	3.70419	0
12970	12.97	-39.439	-54.592	-41.008	-17.143	5.13101	4.8646	4.59818	4.33176	4.06534	4.0387	4.01206	3.98541	3.95877	3.93213	3.90549	3.87885	3.8522	3.82556	3.79892	3.5325	0
12990	12.99	-39.689	-55.623	-40.802	-17.305	5.12007	4.8427	4.56534	4.28797	4.01061	3.98287	3.95514	3.9274	3.89966	3.87193	3.84419	3.81645	3.78872	3.76098	3.73324	3.45588	0
13010	13.01	-40.083	-55.943	-40.952	-17.578	5.10162	4.80581	4.51	4.21419	3.91838	3.8888	3.85922	3.82964	3.80006	3.77047	3.74089	3.71131	3.68173	3.65215	3.62257	3.32676	0
13030	13.03	-40.637	-56.176	-41.904	-17.567	5.10237	4.8073	4.51223	4.21716	3.9221	3.89259	3.86308	3.83358	3.80407	3.77456	3.74506	3.71555	3.68604	3.65654	3.62703	3.33196	0
13050	13.05	-41.472	-57.475	-43.134	-18.177	5.06115	4.72487	4.38858	4.0523	3.71601	3.68239	3.64876	3.61513	3.5815	3.54787	3.51424	3.48062	3.44699	3.41336	3.37973	3.04345	0
13070	13.07	-42.235	-58.604	-43.664	-18.679	5.02723	4.65703	4.28683	3.91662	3.54642	3.5094	3.47238	3.43536	3.39834	3.36132	3.3243	3.28728	3.25026	3.21324	3.17622	2.80601	0
13090	13.09	-42.596	-58.063	-44.223	-19.085	4.9998	4.60216	4.20453	3.80689	3.40926	3.36949	3.32973	3.28997	3.2502	3.21044	3.17068	3.13091	3.09115	3.05139	3.01162	2.61399	0
13110	13.11	-42.528	-58.983	-43.895	-19.096	4.99906	4.60068	4.2023	3.80392	3.40554	3.3657	3.32587	3.28603	3.24619	3.20635	3.16651	3.12668	3.08684	3.047	3.00716	2.60879	0
13130	13.13	-42.259	-58.36	-43.692	-18.981	5.00683	4.61622	4.22561	3.835	3.44439	3.40533	3.36627	3.32721	3.28815	3.24909	3.21003	3.17097	3.13191	3.09285	3.05379	2.66318	0
13150	13.15	-41.948	-56.971	-42.973	-18.675	5.0275	4.65757	4.28764	3.9177	3.54777	3.51078	3.47379	3.43679	3.3998	3.36281	3.32581	3.28882	3.25183	3.21483	3.17784	2.80791	0
13170	13.17	-41.626	-56.287	-43.859	-18.721	5.02439	4.65135	4.27831	3.90527	3.53223	3.49493	3.45762	3.42032	3.38301	3.34571	3.30841	3.2711	3.2338	3.19649	3.15919	2.78615	0
13190	13.19	-41.258	-57.452	-42.312	-17.975	5.0748	4.75216	4.42953	4.10689	3.78426	3.75199	3.71973	3.68747	3.6552	3.62294	3.59068	3.55841	3.52615	3.49389	3.46162	3.13899	0
13210	13.21	-40.689	-55.605	-41.848	-17.733	5.09115	4.78487	4.47858	4.1723	3.86601	3.83539	3.80476	3.77413	3.7435	3.71287	3.68224	3.65162	3.62099	3.59036	3.55973	3.25345	0
13230	13.23	-40.05	-55.251	-41.412	-17.75	5.09	4.78257	4.47514	4.1677	3.86027	3.82953	3.79879	3.76804	3.7373	3.70656	3.67581	3.64507	3.61433	3.58358	3.55284	3.24541	0
13250	13.25	-39.644	-54.753	-41.311	-17.509	5.10629	4.81514	4.52399	4.23284	3.94169	3.91258	3.88346	3.85435	3.82523	3.79612	3.767	3.73789	3.70877	3.67966	3.65054	3.35939	0
13270	13.27	-39.404	-54.489	-40.823	-17.261	5.12304	4.84865	4.57426	4.29987	4.02547	3.99804	3.9706	3.94316	3.91572	3.88828	3.86084	3.8334	3.80596	3.77852	3.75108	3.47669	0
13290	13.29	-39.114	-53.679	-41.193	-16.791	5.1548	4.91216	4.66953	4.42689	4.18426	4.15999	4.13573	4.11147	4.0872	4.06294	4.03868	4.01441	3.99015	3.96589	3.94162	3.69899	0
13310	13.31	-38.686	-53.91	-39.987	-16.935	5.14507	4.8927	4.64034	4.38797	4.13561	4.11037	4.08514	4.0599	4.03466	4.00943	3.98419	3.95895	3.93372	3.90848	3.88324	3.63088	0
13330	13.33	-38.424	-52.553	-39.875	-16.695	5.16129	4.92514	4.68899	4.45284	4.21669	4.19308	4.16946	4.14585	4.12223	4.09862	4.075	4.05139	4.02777	4.00416	3.98054	3.74439	0
13350	13.35	-38.576	-54.083	-39.694	-16.82	5.15284	4.90824	4.66365	4.41906	4.17446	4.15	4.12554	4.10108	4.07662	4.05216	4.0277	4.00324	3.97879	3.95433	3.92987	3.68527	0
13370	13.37	-38.852	-53.194	-40.59	-16.905	5.1471	4.89676	4.64642	4.39608	4.14574	4.12071	4.09568	4.07064	4.04561	4.02058	3.99554	3.97051	3.94547	3.92044	3.89541	3.64507	0
13390	13.39	-38.906	-53.146	-40.683	-16.828	5.1523	4.90716	4.66203	4.41689	4.17176	4.14724	4.12273	4.09822	4.0737	4.04919	4.02468	4.00016	3.97565	3.95114	3.92662	3.68149	0
13410	13.41	-38.575	-52.939	-40.035	-17.111	5.13318	4.86892	4.60466	4.34041	4.07615	4.04972	4.0233	3.99687	3.97045	3.94402	3.9176	3.89117	3.86474	3.83832	3.81189	3.54764	0
13430	13.43	-38.335	-52.972	-39.876	-16.433	5.17899	4.96054	4.7421	4.52365	4.3052	4.28336	4.26151	4.23967	4.21783	4.19598	4.17414	4.15229	4.13045	4.1086	4.08676	3.86831	0
13450	13.45	-38.164	-53.053	-39.763	-16.506	5.17406	4.95068	4.7273	4.50392	4.28054	4.2582	4.23587	4.21353	4.19119	4.16885	4.14651	4.12418	4.10184	4.0795	4.05716	3.83379	0
13470	13.47	-38.121	-52.331	-39.331	-16.788	5.155	4.91257	4.67014	4.4277	4.18527	4.16103	4.13679	4.11254	4.0883	4.06406	4.03981	4.01557	3.99133	3.96708	3.94284	3.70041	0
13490	13.49	-38.134	-52.076	-39.795	-16.86	5.15014	4.90284	4.65554	4.40824	4.16095	4.13622	4.11149	4.08676	4.06203	4.0373	4.01257	3.98784	3.96311	3.93838	3.91365	3.66635	0
13510	13.51	-38.2	-52.224	-40.075	-16.884	5.14851	4.8996	4.65068	4.40176	4.15284	4.12795	4.10306	4.07816	4.05327	4.02838	4.00349	3.9786	3.9537	3.92881	3.90392	3.655	0
13530	13.53	-38.705	-53.526	-40.152	-16.72	5.1596	4.92176	4.68392	4.44608	4.20824	4.18446	4.16068	4.13689	4.11311	4.08933	4.06554	4.04176	4.01797	3.99419	3.97041	3.73257	0
13550	13.55	-39.552	-54.791	-41.291	-17.409	5.11304	4.82865	4.54426	4.25987	3.97547	3.94704	3.9186	3.89016	3.86172	3.83328	3.80484	3.7764	3.74796	3.71952	3.69108	3.40669	0
13570	13.57	-40.07	-54.38	-41.606	-17.958	5.07595	4.75446	4.43297	4.11149	3.79	3.75785	3.7257	3.69356	3.66141	3.62926	3.59711	3.56496	3.53281	3.50066	3.46851	3.14703	0
13590	13.59	-40.118	-55.221	-41.457	-17.781	5.08791	4.77838	4.46885	4.15933	3.8498	3.81885	3.78789	3.75694	3.72599	3.69504	3.66408	3.63313	3.60218	3.57122	3.54027	3.23074	0
13610	13.61	-39.695	-55.109	-40.942	-16.78	5.15554	4.91365	4.67176	4.42987	4.18797	4.16379	4.1396	4.11541	4.09122	4.06703	4.04284	4.01865	3.99446	3.97027	3.94608	3.70419	0
13630	13.63	-38.96	-53.204	-40.258	-17.331	5.11831	4.83919	4.56007	4.28095	4.00183	3.97391	3.946	3.91809	3.89018	3.86226	3.83435	3.80644	3.77853	3.75062	3.7227	3.44358	0
13650	13.65	-38.578	-53.365	-40.162	-16.476	5.17608	4.95473	4.73338	4.51203	4.29068	4.26854	4.24641	4.22427	4.20214	4.18	4.15787	4.13573	4.1136	4.09146	4.06933	3.84797	0
13670	13.67	-38.498	-52.397	-40.847	-17.088	5.13473	4.87203	4.60933	4.34662	4.08392	4.05765	4.03138	4.00511	3.97884	3.95257	3.9263	3.90003	3.87376	3.84749	3.82122	3.55851	0
13690	13.69	-38.635	-53.844	-39.979	-16.932	5.14527	4.89311	4.64095	4.38879	4.13662	4.11141	4.08619	4.06097	4.03576	4.01054	3.98533	3.96011	3.93489	3.90968	3.88446	3.6323	0
13710	13.71	-38.609	-53.85	-39.638	-17.001	5.14061	4.88379	4.62696	4.37014	4.11331	4.08763	4.06195	4.03626	4.01058	3.9849	3.95922	3.93354	3.90785	3.88217	3.85649	3.59966	0
13730	13.73	-38.531	-53.558	-40.113	-16.33	5.18595	4.97446	4.76297	4.55149	4.34	4.31885	4.2977	4.27656	4.25541	4.23426	4.21311	4.19196	4.17081	4.14966	4.12851	3.91703	0
13750	13.75	-38.51	-53.194	-39.976	-17.249	5.12385	4.85027	4.57669	4.30311	4.02953	4.00217	3.97481	3.94745	3.9201	3.89274	3.86538	3.83802	3.81066	3.78331	3.75595	3.48237	0
13770	13.77	-38.637	-54.033	-40.09	-16.641	5.16493	4.93243	4.69993	4.46743	4.23493	4.21168	4.18843	4.16518	4.14193	4.11868	4.09543	4.07218	4.04893	4.02568	4.00243	3.76993	0
13790	13.79	-38.628	-53.77	-40.693	-16.511	5.17372	4.95	4.72629	4.50257	4.27885	4.25648	4.23411	4.21174	4.18937	4.16699	4.14462	4.12225	4.09988	4.07751	4.05514	3.83142	0
13810	13.81	-38.602	-53.92	-39.606	-16.494	5.17487	4.9523	4.72973	4.50716	4.2846	4.26234	4.24008	4.21783	4.19557	4.17331	4.15106	4.1288	4.10654	4.08429	4.06203	3.83946	0
13830	13.83	-38.778	-52.776	-40.795	-16.752	5.15743	4.91743	4.67743	4.43743	4.19743	4.17343	4.14943	4.12543	4.10143	4.07743	4.05343	4.02943	4.00543	3.98143	3.95743	3.71743	0
13850	13.85	-38.846	-54.063	-40.593	-16.317	5.18683	4.97622	4.76561	4.555	4.34439	4.32333	4.30227	4.28121	4.26015	4.23909	4.21803	4.19697	4.17591	4.15485	4.13379	3.92318	0
13870	13.87	-38.842	-54.737	-39.838	-16.625	5.16601	4.9346	4.70318	4.47176	4.24034	4.2172	4.19406	4.17091	4.14777	4.12463	4.10149	4.07835	4.0552	4.03206	4.00892	3.7775	0
13890	13.89	-38.989	-54.987	-40.006	-16.912	5.14662	4.89581	4.645	4.39419	4.14338	4.1183	4.09322	4.06814	4.04306	4.01797	3.99289	3.96781	3.94273	3.91765	3.89257	3.64176	0
13910	13.91	-39.45	-55.135	-40.966	-17.058	5.13676	4.87608	4.61541	4.35473	4.09406	4.06799	4.04192	4.01585	3.98979	3.96372	3.93765	3.91158	3.88551	3.85945	3.83338	3.5727	0
13930	13.93	-40.331	-57.035	-41.939	-17.392	5.11419	4.83095	4.5477	4.26446	3.98122	3.95289	3.92457	3.89624	3.86792	3.8396	3.81127	3.78295	3.75462	3.7263	3.69797	3.41473	0
13950	13.95	-41.174	-57.874	-42.11	-18.066	5.06865	4.73987	4.41108	4.0823	3.75351	3.72064	3.68776	3.65488	3.622	3.58912	3.55624	3.52337	3.49049	3.45761	3.42473	3.09595	0
13970	13.97	-41.819	-58.731	-43.864	-18.339	5.0502	4.70297	4.35574	4.00851	3.66129	3.62656	3.59184	3.55712	3.52239	3.48767	3.45295	3.41822	3.3835	3.34878	3.31406	2.96683	0
13990	13.99	-41.99	-58.968	-43.092	-18.49	5.04	4.68257	4.32514	3.9677	3.61027	3.57453	3.53879	3.50304	3.4673	3.43156	3.39581	3.36007	3.32433	3.28858	3.25284	2.89541	0
14010	14.01	-41.797	-58.924	-43.505	-18.386	5.04703	4.69662	4.34622	3.99581	3.64541	3.61037	3.57533	3.54029	3.50524	3.4702	3.43516	3.40012	3.36508	3.33004	3.295	2.9446	0
14030	14.03	-41.035	-58.323	-42.01	-17.937	5.07737	4.7573	4.43723	4.11716	3.7971	3.76509	3.73308	3.70108	3.66907	3.63706	3.60506	3.57305	3.54104	3.50904	3.47703	3.15696	0
14050	14.05	-39.973	-56.459	-41.297	-17.361	5.11629	4.83514	4.55399	4.27284	3.99169	3.96358	3.93546	3.90735	3.87923	3.85112	3.823	3.79489	3.76677	3.73866	3.71054	3.42939	0
14070	14.07	-39.155	-54.859	-40.425	-17.329	5.11845	4.83946	4.56047	4.28149	4.0025	3.9746	3.9467	3.91881	3.89091	3.86301	3.83511	3.80721	3.77931	3.75141	3.72351	3.44453	0
14090	14.09	-39.078	-54.834	-39.552	-17.562	5.1027	4.80797	4.51324	4.21851	3.92379	3.89431	3.86484	3.83537	3.80589	3.77642	3.74695	3.71747	3.688	3.65853	3.62906	3.33433	0
14110	14.11	-39.093	-54.291	-40.261	-17.267	5.12264	4.84784	4.57304	4.29824	4.02345	3.99597	3.96849	3.94101	3.91353	3.88605	3.85857	3.83109	3.80361	3.77613	3.74865	3.47385	0
14130	14.13	-39.11	-54.233	-40.291	-17.161	5.1298	4.86216	4.59453	4.32689	4.05926	4.03249	4.00573	3.97897	3.9522	3.92544	3.89868	3.87191	3.84515	3.81839	3.79162	3.52399	0
14150	14.15	-38.736	-53.496	-39.727	-17.296	5.12068	4.84392	4.56716	4.29041	4.01365	3.98597	3.9583	3.93062	3.90295	3.87527	3.8476	3.81992	3.79224	3.76457	3.73689	3.46014	0
14170	14.17	-38.081	-52.869	-38.838	-17.121	5.1325	4.86757	4.60264	4.3377	4.07277	4.04628	4.01979	3.99329	3.9668	3.94031	3.91381	3.88732	3.86083	3.83433	3.80784	3.54291	0
14190	14.19	-37.642	-52.727	-38.644	-17.1	5.13392	4.87041	4.60689	4.34338	4.07987	4.05351	4.02716	4.00081	3.97446	3.94811	3.92176	3.89541	3.86906	3.8427	3.81635	3.55284	0
14210	14.21	-37.569	-51.651	-38.475	-17.379	5.11507	4.8327	4.55034	4.26797	3.98561	3.95737	3.92914	3.9009	3.87266	3.84443	3.81619	3.78795	3.75972	3.73148	3.70324	3.42088	0
14230	14.23	-37.376	-52.055	-38.339	-16.825	5.1525	4.90757	4.66264	4.4177	4.17277	4.14828	4.12379	4.09929	4.0748	4.05031	4.02581	4.00132	3.97683	3.95233	3.92784	3.68291	0
14250	14.25	-37.045	-51.214	-37.922	-16.755	5.15723	4.91703	4.67683	4.43662	4.19642	4.1724	4.14838	4.12436	4.10034	4.07632	4.0523	4.02828	4.00426	3.98024	3.95622	3.71601	0
14270	14.27	-36.856	-50.93	-38.166	-16.451	5.17777	4.95811	4.73845	4.51879	4.29912	4.27716	4.25519	4.23322	4.21126	4.18929	4.16733	4.14536	4.12339	4.10143	4.07946	3.8598	0
14290	14.29	-37.008	-51.224	-38.724	-16.442	5.17838	4.95933	4.74027	4.52122	4.30216	4.28026	4.25835	4.23645	4.21454	4.19264	4.17073	4.14883	4.12692	4.10501	4.08311	3.86406	0
14310	14.31	-37.401	-50.748	-38.794	-17.033	5.13845	4.87946	4.62047	4.36149	4.1025	4.0766	4.0507	4.02481	3.99891	3.97301	3.94711	3.92121	3.89531	3.86941	3.84351	3.58453	0
14330	14.33	-37.381	-50.836	-39.469	-17.146	5.13081	4.86419	4.59757	4.33095	4.06433	4.03766	4.011	3.98434	3.95768	3.93101	3.90435	3.87769	3.85103	3.82437	3.7977	3.53108	0
14350	14.35	-37.22	-50.996	-38.714	-17.07	5.13595	4.87446	4.61297	4.35149	4.09	4.06385	4.0377	4.01156	3.98541	3.95926	3.93311	3.90696	3.88081	3.85466	3.82851	3.56703	0
14370	14.37	-37.069	-50.584	-38.307	-17.099	5.13399	4.87054	4.6071	4.34365	4.0802	4.05386	4.02751	4.00117	3.97483	3.94848	3.92214	3.89579	3.86945	3.8431	3.81676	3.55331	0
14390	14.39	-36.785	-50.731	-38.559	-16.847	5.15101	4.9046	4.65818	4.41176	4.16534	4.1407	4.11606	4.09141	4.06677	4.04213	4.01749	3.99285	3.9682	3.94356	3.91892	3.6725	0
14410	14.41	-36.334	-49.472	-37.484	-16.837	5.15169	4.90595	4.6602	4.41446	4.16872	4.14414	4.11957	4.09499	4.07042	4.04585	4.02127	3.9967	3.97212	3.94755	3.92297	3.67723	0
14430	14.43	-36.024	-49.475	-37.228	-16.546	5.17135	4.94527	4.71919	4.49311	4.26703	4.24442	4.22181	4.1992	4.1766	4.15399	4.13138	4.10877	4.08616	4.06356	4.04095	3.81487	0
14450	14.45	-35.823	-48.745	-36.584	-16.634	5.16541	4.93338	4.70135	4.46933	4.2373	4.2141	4.19089	4.16769	4.14449	4.12129	4.09808	4.07488	4.05168	4.02847	4.00527	3.77324	0
14470	14.47	-35.788	-48.85	-36.291	-16.821	5.15277	4.90811	4.66345	4.41879	4.17412	4.14966	4.12519	4.10072	4.07626	4.05179	4.02733	4.00286	3.97839	3.95393	3.92946	3.6848	0
14490	14.49	-35.899	-48.646	-37.371	-16.681	5.16223	4.92703	4.69183	4.45662	4.22142	4.1979	4.17438	4.15086	4.12734	4.10382	4.0803	4.05678	4.03326	4.00974	3.98622	3.75101	0
14510	14.51	-36.358	-49.427	-37.465	-16.879	5.14885	4.90027	4.65169	4.40311	4.15453	4.12967	4.10481	4.07995	4.0551	4.03024	4.00538	3.98052	3.95566	3.93081	3.90595	3.65737	0
14530	14.53	-36.897	-50.116	-37.751	-17.501	5.10683	4.81622	4.52561	4.235	3.94439	3.91533	3.88627	3.85721	3.82815	3.79909	3.77003	3.74097	3.71191	3.68285	3.65379	3.36318	0
14550	14.55	-37.717	-51.304	-39.142	-17.822	5.08514	4.77284	4.46054	4.14824	3.83595	3.80472	3.77349	3.74226	3.71103	3.6798	3.64857	3.61734	3.58611	3.55488	3.52365	3.21135	0
14570	14.57	-38.631	-52.562	-39.811	-18.429	5.04412	4.69081	4.3375	3.98419	3.63088	3.59555	3.56022	3.52489	3.48956	3.45422	3.41889	3.38356	3.34823	3.3129	3.27757	2.92426	0
14590	14.59	-39.776	-54.313	-40.674	-18.598	5.0327	4.66797	4.30324	3.93851	3.57379	3.53731	3.50084	3.46437	3.42789	3.39142	3.35495	3.31847	3.282	3.24553	3.20906	2.84433	0
14610	14.61	-40.9	-55.555	-41.867	-19.562	4.96757	4.5377	4.10784	3.67797	3.24811	3.20512	3.16214	3.11915	3.07616	3.03318	2.99019	2.9472	2.90422	2.86123	2.81824	2.38838	0
14630	14.63	-42.434	-58.059	-44.002	-20.162	4.92703	4.45662	3.98622	3.51581	3.04541	2.99837	2.95133	2.90429	2.85724	2.8102	2.76316	2.71612	2.66908	2.62204	2.575	2.1046	0
14650	14.65	-44.395	-60.865	-45.04	-21.259	4.85291	4.30838	3.76385	3.21933	2.6748	2.62035	2.56589	2.51144	2.45699	2.40254	2.34808	2.29363	2.23918	2.18472	2.13027	1.58574	0
14670	14.67	-46.175	-62.889	-47.064	-22.439	4.77318	4.14892	3.52466	2.90041	2.27615	2.21372	2.1513	2.08887	2.02645	1.96402	1.9016	1.83917	1.77674	1.71432	1.65189	1.02764	0
14690	14.69	-47.068	-65.312	-49.338	-22.342	4.77973	4.16203	3.54433	2.92662	2.30892	2.24715	2.18538	2.12361	2.06184	2.00007	1.9383	1.87653	1.81476	1.75299	1.69122	1.07351	0
14710	14.71	-47.526	-65.437	-49.114	-22.709	4.75493	4.11243	3.46993	2.82743	2.18493	2.12068	2.05643	1.99218	1.92793	1.86368	1.79943	1.73518	1.67093	1.60668	1.54243	0.899934	0
14730	14.73	-47.536	-65.451	-49.229	-22.46	4.77176	4.14608	3.52041	2.89473	2.26906	2.20649	2.14392	2.08135	2.01879	1.95622	1.89365	1.83108	1.76851	1.70595	1.64338	1.0177	0
14750	14.75	-47.653	-65.665	-49.318	-22.42	4.77446	4.15149	3.52851	2.90554	2.28257	2.22027	2.15797	2.09568	2.03338	1.97108	1.90879	1.84649	1.78419	1.72189	1.6596	1.03662	0
14770	14.77	-47.833	-66.026	-48.943	-22.954	4.73838	4.07933	3.42027	2.76122	2.10216	2.03626	1.97035	1.90445	1.83854	1.77264	1.70673	1.64083	1.57492	1.50901	1.44311	0.784055	0
14790	14.79	-47.918	-65.794	-49.777	-23.204	4.72149	4.04554	3.3696	2.69365	2.0177	1.95011	1.88251	1.81492	1.74733	1.67973	1.61214	1.54454	1.47695	1.40935	1.34176	0.665812	0
14810	14.81	-48.02	-66.208	-49.227	-23.375	4.70993	4.02243	3.33493	2.64743	1.95993	1.89118	1.82243	1.75368	1.68493	1.61618	1.54743	1.47868	1.40993	1.34118	1.27243	0.584934	0
14830	14.83	-48.014	-66.29	-49.902	-23.269	4.7171	4.03676	3.35642	2.67608	1.99574	1.92771	1.85968	1.79164	1.72361	1.65558	1.58754	1.51951	1.45147	1.38344	1.31541	0.635069	0
14850	14.85	-48.21	-66.542	-49.227	-23.188	4.72257	4.0477	3.37284	2.69797	2.02311	1.95562	1.88814	1.82065	1.75316	1.68568	1.61819	1.5507	1.48322	1.41573	1.34824	0.67338	0
14870	14.87	-48.23	-65.927	-50.441	-22.998	4.73541	4.07338	3.41135	2.74933	2.0873	2.0211	1.95489	1.88869	1.82249	1.75629	1.69008	1.62388	1.55768	1.49147	1.42527	0.763245	0
14890	14.89	-48.336	-67.144	-49.73	-23.419	4.70696	4.01649	3.32601	2.63554	1.94507	1.87602	1.80697	1.73793	1.66888	1.59983	1.53079	1.46174	1.39269	1.32364	1.2546	0.564123	0
14910	14.91	-48.437	-66.871	-49.763	-23.224	4.72014	4.04284	3.36554	2.68824	2.01095	1.94322	1.87549	1.80776	1.74003	1.6723	1.60457	1.53684	1.46911	1.40138	1.33365	0.656353	0
14930	14.93	-48.46	-67.405	-49.681	-23.23	4.71973	4.04203	3.36433	2.68662	2.00892	1.94115	1.87338	1.80561	1.73784	1.67007	1.6023	1.53453	1.46676	1.39899	1.33122	0.653515	0
14950	14.95	-48.618	-67.956	-50.921	-23.105	4.72818	4.05892	3.38966	2.72041	2.05115	1.98422	1.9173	1.85037	1.78345	1.71652	1.6496	1.58267	1.51574	1.44882	1.38189	0.712636	0
14970	14.97	-48.67	-66.909	-50.813	-23.572	4.69662	3.99581	3.295	2.59419	1.89338	1.8233	1.75322	1.68314	1.61306	1.54297	1.47289	1.40281	1.33273	1.26265	1.19257	0.491758	0
14990	14.99	-48.706	-66.58	-50.226	-23.343	4.7121	4.02676	3.34142	2.65608	1.97074	1.90221	1.83368	1.76514	1.69661	1.62808	1.55954	1.49101	1.42247	1.35394	1.28541	0.600069	0
15010	15.01	-48.72	-66.781	-50.569	-23.31	4.71433	4.03122	3.34811	2.665	1.98189	1.91358	1.84527	1.77696	1.70865	1.64034	1.57203	1.50372	1.43541	1.3671	1.29879	0.615677	0
15030	15.03	-48.702	-67.21	-50.751	-23.376	4.70987	4.0223	3.33473	2.64716	1.9596	1.89084	1.82208	1.75333	1.68457	1.61581	1.54706	1.4783	1.40954	1.34079	1.27203	0.584461	0
15050	15.05	-48.659	-67.245	-50.712	-23.673	4.6898	3.98216	3.27453	2.56689	1.85926	1.78849	1.71773	1.64697	1.5762	1.50544	1.43468	1.36391	1.29315	1.22239	1.15162	0.443988	0
15070	15.07	-48.699	-67.147	-51.451	-23.314	4.71406	4.03068	3.3473	2.66392	1.98054	1.9122	1.84387	1.77553	1.70719	1.63885	1.57051	1.50218	1.43384	1.3655	1.29716	0.613785	0
15090	15.09	-48.628	-67.182	-50.482	-23.659	4.69074	3.98406	3.27737	2.57068	1.86399	1.79332	1.72265	1.65198	1.58131	1.51064	1.43997	1.36931	1.29864	1.22797	1.1573	0.450609	0
15110	15.11	-48.533	-67.35	-50.721	-23.227	4.71993	4.04243	3.36493	2.68743	2.00993	1.94218	1.87443	1.80668	1.73893	1.67118	1.60343	1.53568	1.46793	1.40018	1.33243	0.654934	0
15130	15.13	-48.463	-67.422	-50.138	-23.555	4.69777	3.99811	3.29845	2.59879	1.89912	1.82916	1.75919	1.68922	1.61926	1.54929	1.47933	1.40936	1.33939	1.26943	1.19946	0.499799	0
15150	15.15	-48.389	-66.88	-50.472	-23.169	4.72385	4.05027	3.37669	2.70311	2.02953	1.96217	1.89481	1.82745	1.7601	1.69274	1.62538	1.55802	1.49066	1.42331	1.35595	0.682366	0
15170	15.17	-48.412	-66.73	-50.061	-23.345	4.71196	4.02649	3.34101	2.65554	1.97007	1.90152	1.83297	1.76443	1.69588	1.62733	1.55879	1.49024	1.42169	1.35314	1.2846	0.599123	0
15190	15.19	-48.378	-67.586	-49.825	-23.341	4.71223	4.02703	3.34183	2.65662	1.97142	1.9029	1.83438	1.76586	1.69734	1.62882	1.5603	1.49178	1.42326	1.35474	1.28622	0.601015	0
15210	15.21	-48.47	-66.945	-50.425	-23.476	4.70311	4.00879	3.31446	2.62014	1.92581	1.85638	1.78695	1.71751	1.64808	1.57865	1.50922	1.43979	1.37035	1.30092	1.23149	0.537163	0
15230	15.23	-48.444	-67.049	-50.18	-23.898	4.6746	3.95176	3.22892	2.50608	1.78324	1.71096	1.63868	1.56639	1.49411	1.42183	1.34954	1.27726	1.20497	1.13269	1.06041	0.337569	0
15250	15.25	-48.619	-67.461	-50.632	-23.214	4.72081	4.04419	3.36757	2.69095	2.01433	1.94666	1.879	1.81134	1.74368	1.67601	1.60835	1.54069	1.47303	1.40537	1.3377	0.661082	0
15270	15.27	-48.811	-67.3	-50.974	-23.583	4.69588	3.99433	3.29277	2.59122	1.88966	1.81951	1.74935	1.6792	1.60904	1.53889	1.46873	1.39858	1.32842	1.25826	1.18811	0.486555	0
15290	15.29	-48.918	-67.347	-51.021	-24.273	4.64926	3.90108	3.15291	2.40473	1.65656	1.58174	1.50692	1.4321	1.35729	1.28247	1.20765	1.13283	1.05801	0.983197	0.90838	0.160204	0
15310	15.31	-49.12	-67.827	-51.43	-24.107	4.66047	3.92351	3.18656	2.4496	1.71264	1.63894	1.56524	1.49155	1.41785	1.34416	1.27046	1.19676	1.12307	1.04937	0.975677	0.238718	0
15330	15.33	-49.274	-68.29	-51.171	-23.984	4.66879	3.94014	3.21149	2.48284	1.75419	1.68133	1.60846	1.5356	1.46273	1.38987	1.317	1.24414	1.17127	1.09841	1.02554	0.296893	0
15350	15.35	-49.332	-69.124	-50.208	-24.086	4.66189	3.92635	3.19081	2.45527	1.71973	1.64618	1.57262	1.49907	1.42551	1.35196	1.27841	1.20485	1.1313	1.05774	0.984191	0.24865	0
15370	15.37	-49.434	-68.6	-51.452	-23.709	4.68737	3.9773	3.26723	2.55716	1.8471	1.77609	1.70508	1.63408	1.56307	1.49206	1.42106	1.35005	1.27904	1.20804	1.13703	0.426961	0
15390	15.39	-49.489	-67.911	-51.835	-23.938	4.67189	3.94635	3.22081	2.49527	1.76973	1.69718	1.62462	1.55207	1.47951	1.40696	1.33441	1.26185	1.1893	1.11674	1.04419	0.31865	0
15410	15.41	-49.504	-68.631	-51.602	-24.319	4.64615	3.89487	3.14358	2.3923	1.64101	1.56589	1.49076	1.41563	1.3405	1.26537	1.19024	1.11512	1.03999	0.964859	0.889731	0.138447	0
15430	15.43	-49.69	-68.832	-51.246	-24.149	4.65764	3.91784	3.17804	2.43824	1.69845	1.62447	1.55049	1.47651	1.40253	1.32855	1.25457	1.18059	1.10661	1.03263	0.95865	0.218853	0
15450	15.45	-49.803	-68.233	-51.789	-24.383	4.64183	3.88622	3.13061	2.375	1.61939	1.54383	1.46827	1.39271	1.31715	1.24159	1.16603	1.09047	1.01491	0.939346	0.863785	0.108177	0
15470	15.47	-49.934	-69.871	-51.348	-24.264	4.64987	3.9023	3.15473	2.40716	1.6596	1.58484	1.51008	1.43533	1.36057	1.28581	1.21106	1.1363	1.06154	0.986785	0.912028	0.164461	0
15490	15.49	-50.005	-69.937	-51.5	-24.061	4.66358	3.92973	3.19588	2.46203	1.72818	1.65479	1.58141	1.50802	1.43464	1.36125	1.28787	1.21448	1.1411	1.06771	0.994326	0.260474	0
15510	15.51	-50.058	-69.431	-51.669	-24.729	4.61845	3.83946	3.06047	2.28149	1.5025	1.4246	1.3467	1.26881	1.19091	1.11301	1.03511	0.957211	0.879312	0.801413	0.723515	-0.0554716	0
15530	15.53	-50.117	-69.528	-51.557	-24.626	4.62541	3.85338	3.08135	2.30933	1.5373	1.4601	1.38289	1.30569	1.22849	1.15129	1.07408	0.99688	0.919677	0.842474	0.765272	-0.00675543	0
15550	15.55	-50.101	-68.941	-52.633	-24.588	4.62797	3.85851	3.08906	2.3196	1.55014	1.47319	1.39624	1.3193	1.24235	1.16541	1.08846	1.01151	0.934569	0.857623	0.780677	0.0112175	0
15570	15.57	-50.145	-68.779	-51.621	-24.269	4.64953	3.90162	3.15372	2.40581	1.65791	1.58312	1.50833	1.43354	1.35874	1.28395	1.20916	1.13437	1.05958	0.984792	0.910001	0.162096	0
15590	15.59	-50.157	-68.46	-52.068	-24.624	4.62554	3.85365	3.08176	2.30987	1.53797	1.46079	1.3836	1.30641	1.22922	1.15203	1.07484	0.99765	0.920461	0.843272	0.766082	-0.00580948	0
15610	15.61	-50.192	-69.086	-51.222	-24.727	4.61858	3.83973	3.06088	2.28203	1.50318	1.42529	1.34741	1.26952	1.19164	1.11375	1.03587	0.957981	0.880096	0.802211	0.724326	-0.0545257	0
15630	15.63	-50.141	-68.711	-52.304	-25.225	4.58493	3.77243	2.95993	2.14743	1.33493	1.25368	1.17243	1.09118	1.00993	0.928684	0.847434	0.766184	0.684934	0.603684	0.522434	-0.290066	0
15650	15.65	-50.217	-69.419	-51.868	-24.756	4.61662	3.83581	3.055	2.27419	1.49338	1.4153	1.33722	1.25914	1.18106	1.10297	1.02489	0.946812	0.868731	0.79065	0.712569	-0.0682419	0
15670	15.67	-50.35	-69.491	-51.982	-24.372	4.64257	3.8877	3.13284	2.37797	1.62311	1.54762	1.47214	1.39665	1.32116	1.24568	1.17019	1.0947	1.01922	0.943731	0.868245	0.11338	0
15690	15.69	-50.375	-69.092	-52.246	-24.793	4.61412	3.83081	3.0475	2.26419	1.48088	1.40255	1.32422	1.24589	1.16756	1.08922	1.01089	0.932562	0.854231	0.7759	0.697569	-0.0857419	0
15710	15.71	-50.404	-69.377	-52.139	-24.663	4.62291	3.84838	3.07385	2.29933	1.5248	1.44735	1.36989	1.29244	1.21499	1.13754	1.06008	0.98263	0.905177	0.827724	0.750272	-0.0242554	0
15730	15.73	-50.464	-69.533	-52.105	-24.705	4.62007	3.8427	3.06534	2.28797	1.51061	1.43287	1.35514	1.2774	1.19966	1.12193	1.04419	0.966454	0.888718	0.810981	0.733245	-0.0441203	0
15750	15.75	-50.46	-69.414	-52.039	-24.859	4.60966	3.82189	3.03412	2.24635	1.45858	1.37981	1.30103	1.22225	1.14347	1.0647	0.98592	0.907143	0.828366	0.749589	0.670812	-0.116958	0
15770	15.77	-50.364	-69.248	-51.77	-25.027	4.59831	3.79919	3.00007	2.20095	1.40183	1.32191	1.242	1.16209	1.08218	1.00226	0.922353	0.842441	0.762528	0.682616	0.602704	-0.196418	0
15790	15.79	-50.289	-69.706	-51.695	-24.801	4.61358	3.82973	3.04588	2.26203	1.47818	1.39979	1.32141	1.24302	1.16464	1.08625	1.00787	0.929481	0.851096	0.772711	0.694326	-0.0895257	0
15810	15.81	-50.048	-69.185	-51.518	-25.515	4.56534	3.73324	2.90115	2.06906	1.23696	1.15375	1.07054	0.987332	0.904123	0.820913	0.737704	0.654495	0.571285	0.488076	0.404866	-0.427228	0
15830	15.83	-49.981	-69.007	-51.674	-24.609	4.62656	3.85568	3.0848	2.31392	1.54304	1.46595	1.38887	1.31178	1.23469	1.1576	1.08051	1.00343	0.926339	0.849251	0.772163	0.00128511	0
15850	15.85	-49.848	-68.05	-52.028	-24.597	4.62737	3.8573	3.08723	2.31716	1.5471	1.47009	1.39308	1.31608	1.23907	1.16206	1.08506	1.00805	0.931042	0.854035	0.777028	0.00696079	0
15870	15.87	-49.755	-68.441	-51.346	-24.867	4.60912	3.82081	3.0325	2.24419	1.45588	1.37705	1.29822	1.21939	1.14056	1.06172	0.982893	0.904062	0.825231	0.7464	0.667569	-0.120742	0
15890	15.89	-49.723	-68.669	-51.792	-24.058	4.66379	3.93014	3.19649	2.46284	1.72919	1.65583	1.58246	1.5091	1.43573	1.36237	1.289	1.21564	1.14227	1.06891	0.995542	0.261893	0
15910	15.91	-49.898	-68.224	-52.084	-24.943	4.60399	3.81054	3.0171	2.22365	1.4302	1.35086	1.27151	1.19217	1.11283	1.03348	0.954136	0.874792	0.795447	0.716103	0.636758	-0.156688	0
15930	15.93	-50.036	-69.137	-51.742	-24.74	4.6177	3.83797	3.05824	2.27851	1.49879	1.42081	1.34284	1.26487	1.18689	1.10892	1.03095	0.952974	0.875001	0.797028	0.719055	-0.0606743	0
15950	15.95	-50.235	-68.817	-52.347	-25.485	4.56737	3.7373	2.90723	2.07716	1.2471	1.16409	1.08108	0.998076	0.915069	0.832062	0.749055	0.666049	0.583042	0.500035	0.417028	-0.413039	0
15970	15.97	-50.546	-69.529	-52.446	-25.505	4.56601	3.7346	2.90318	2.07176	1.24034	1.1572	1.07406	0.990913	0.907772	0.82463	0.741488	0.658346	0.575204	0.492062	0.40892	-0.422499	0
15990	15.99	-50.702	-69.84	-52.466	-25.099	4.59345	3.78946	2.98547	2.18149	1.3775	1.2971	1.2167	1.13631	1.05591	0.975508	0.895109	0.814711	0.734312	0.653913	0.573515	-0.230472	0
16010	16.01	-50.931	-69.948	-52.914	-24.824	4.61203	3.82662	3.04122	2.25581	1.47041	1.39187	1.31333	1.23479	1.15624	1.0777	0.999163	0.920623	0.842082	0.763542	0.685001	-0.100404	0
16030	16.03	-51.146	-70.383	-52.609	-26.046	4.52946	3.66149	2.79351	1.92554	1.05757	0.970772	0.883974	0.797177	0.71038	0.623582	0.536785	0.449988	0.363191	0.276393	0.189596	-0.678377	0
16050	16.05	-51.206	-70.147	-53.102	-25.48	4.5677	3.73797	2.90824	2.07851	1.24879	1.16581	1.08284	0.999866	0.916893	0.83392	0.750947	0.667974	0.585001	0.502028	0.419055	-0.410674	0
16070	16.07	-51.299	-69.906	-53.176	-25.632	4.55743	3.71743	2.87743	2.03743	1.19743	1.11343	1.02943	0.945434	0.861434	0.777434	0.693434	0.609434	0.525434	0.441434	0.357434	-0.482566	0
16090	16.09	-51.304	-70.485	-52.929	-26.118	4.5246	3.65176	2.77892	1.90608	1.03324	0.945961	0.858677	0.771393	0.684109	0.596826	0.509542	0.422258	0.334974	0.247691	0.160407	-0.712431	0
16110	16.11	-51.161	-69.697	-53.32	-25.798	4.54622	3.695	2.84379	1.99257	1.14135	1.05623	0.971109	0.885988	0.800866	0.715745	0.630623	0.545501	0.46038	0.375258	0.290136	-0.56108	0
16130	16.13	-50.955	-70.552	-52.819	-25.528	4.56446	3.73149	2.89851	2.06554	1.23257	1.14927	1.06597	0.982677	0.89938	0.816082	0.732785	0.649488	0.566191	0.482893	0.399596	-0.433377	0
16150	16.15	-50.799	-70.058	-52.368	-24.929	4.60493	3.81243	3.01993	2.22743	1.43493	1.35568	1.27643	1.19718	1.11793	1.03868	0.959434	0.880184	0.800934	0.721684	0.642434	-0.150066	0
16170	16.17	-50.542	-69.359	-52.946	-25.078	4.59487	3.7923	2.98973	2.18716	1.3846	1.30434	1.22408	1.14383	1.06357	0.983312	0.903055	0.822799	0.742542	0.662285	0.582028	-0.220539	0
16190	16.19	-50.432	-68.85	-52.179	-25.186	4.58757	3.7777	2.96784	2.15797	1.34811	1.26712	1.18614	1.10515	1.02416	0.943177	0.862191	0.781204	0.700218	0.619231	0.538245	-0.27162	0
16210	16.21	-50.36	-69.657	-51.848	-25.2	4.58662	3.77581	2.965	2.15419	1.34338	1.2623	1.18122	1.10014	1.01906	0.937974	0.856893	0.775812	0.694731	0.61365	0.532569	-0.278242	0
16230	16.23	-50.428	-68.98	-52.149	-25.099	4.59345	3.78946	2.98547	2.18149	1.3775	1.2971	1.2167	1.13631	1.05591	0.975508	0.895109	0.814711	0.734312	0.653913	0.573515	-0.230472	0
16250	16.25	-50.433	-69.562	-52.48	-24.923	4.60534	3.81324	3.02115	2.22906	1.43696	1.35775	1.27854	1.19933	1.12012	1.04091	0.961704	0.882495	0.803285	0.724076	0.644866	-0.147228	0
16270	16.27	-50.507	-69.078	-52.888	-24.836	4.61122	3.825	3.03879	2.25257	1.46635	1.38773	1.30911	1.23049	1.15187	1.07324	0.994623	0.916001	0.83738	0.758758	0.680136	-0.10608	0
16290	16.29	-50.432	-68.586	-52.716	-25.681	4.55412	3.71081	2.8675	2.02419	1.18088	1.09655	1.01222	0.927886	0.843555	0.759224	0.674893	0.590562	0.506231	0.4219	0.337569	-0.505742	0
16310	16.31	-50.396	-69.734	-51.779	-25.338	4.5773	3.75716	2.93703	2.11689	1.29676	1.21474	1.13273	1.05072	0.968704	0.886691	0.804677	0.722663	0.64065	0.558636	0.476623	-0.343512	0
16330	16.33	-50.319	-68.952	-52.018	-25.008	4.5996	3.80176	3.00392	2.20608	1.40824	1.32846	1.24868	1.16889	1.08911	1.00933	0.929542	0.849758	0.769974	0.690191	0.610407	-0.187431	0
16350	16.35	-50.211	-68.667	-52.254	-25.219	4.58534	3.77324	2.96115	2.14906	1.33696	1.25575	1.17454	1.09333	1.01212	0.930913	0.849704	0.768495	0.687285	0.606076	0.524866	-0.287228	0
16370	16.37	-50.146	-68.752	-52.096	-25.24	4.58392	3.77041	2.95689	2.14338	1.32987	1.24851	1.16716	1.08581	1.00446	0.923109	0.841758	0.760407	0.679055	0.597704	0.516353	-0.297161	0
16390	16.39	-50.043	-68.696	-51.737	-25.049	4.59683	3.79622	2.99561	2.195	1.39439	1.31433	1.23427	1.15421	1.07415	0.994089	0.914028	0.833968	0.753907	0.673846	0.593785	-0.206823	0
16410	16.41	-49.894	-68.316	-51.556	-24.705	4.62007	3.8427	3.06534	2.28797	1.51061	1.43287	1.35514	1.2774	1.19966	1.12193	1.04419	0.966454	0.888718	0.810981	0.733245	-0.0441203	0
16430	16.43	-49.693	-68.443	-51.138	-25.149	4.59007	3.7827	2.97534	2.16797	1.36061	1.27987	1.19914	1.1184	1.03766	0.956927	0.876191	0.795454	0.714718	0.633981	0.553245	-0.25412	0
16450	16.45	-49.669	-68.256	-51.648	-24.982	4.60135	3.80527	3.00919	2.21311	1.41703	1.33742	1.25781	1.1782	1.0986	1.01899	0.93938	0.859772	0.780163	0.700555	0.620947	-0.175134	0
16470	16.47	-49.649	-68.408	-51.603	-24.85	4.61027	3.82311	3.03595	2.24879	1.46162	1.38291	1.30419	1.22547	1.14676	1.06804	0.989326	0.910609	0.831893	0.753177	0.674461	-0.112701	0
16490	16.49	-49.613	-67.699	-51.385	-25.145	4.59034	3.78324	2.97615	2.16906	1.36196	1.28125	1.20054	1.11983	1.03912	0.958413	0.877704	0.796995	0.716285	0.635576	0.554866	-0.252228	0
16510	16.51	-49.706	-68.316	-51.49	-25.088	4.59419	3.79095	2.9877	2.18446	1.38122	1.30089	1.22057	1.14024	1.05992	0.979596	0.899272	0.818947	0.738623	0.658299	0.577974	-0.225269	0
16530	16.53	-49.661	-68.23	-51.522	-24.842	4.61081	3.82419	3.03757	2.25095	1.46433	1.38566	1.307	1.22834	1.14968	1.07101	0.992353	0.913691	0.835028	0.756366	0.677704	-0.108918	0
16550	16.55	-49.584	-67.411	-51.107	-25.266	4.58216	3.76689	2.95162	2.13635	1.32108	1.23956	1.15803	1.0765	0.994974	0.913447	0.83192	0.750393	0.668866	0.587339	0.505812	-0.309458	0
16570	16.57	-49.615	-67.971	-50.347	-25.529	4.56439	3.73135	2.89831	2.06527	1.23223	1.14893	1.06562	0.982319	0.899015	0.815711	0.732407	0.649103	0.565799	0.482495	0.399191	-0.43385	0
16590	16.59	-49.725	-68.344	-51.223	-25.226	4.58487	3.7723	2.95973	2.14716	1.3346	1.25334	1.17208	1.09083	1.00957	0.928312	0.847055	0.765799	0.684542	0.603285	0.522028	-0.290539	0
16610	16.61	-49.907	-67.816	-51.516	-25.332	4.5777	3.75797	2.93824	2.11851	1.29879	1.21681	1.13484	1.05287	0.970893	0.88892	0.806947	0.724974	0.643001	0.561028	0.479055	-0.340674	0
16630	16.63	-50.087	-68.227	-52.017	-25.858	4.54216	3.68689	2.83162	1.97635	1.12108	1.03556	0.950028	0.864501	0.778974	0.693447	0.60792	0.522393	0.436866	0.351339	0.265812	-0.589458	0
16650	16.65	-50.224	-68.996	-52.146	-25.524	4.56473	3.73203	2.89933	2.06662	1.23392	1.15065	1.06738	0.984109	0.900839	0.817569	0.734299	0.651028	0.567758	0.484488	0.401218	-0.431485	0
16670	16.67	-50.335	-68.591	-52.058	-25.405	4.57277	3.74811	2.92345	2.09879	1.27412	1.19166	1.10919	1.02672	0.944258	0.861792	0.779326	0.696859	0.614393	0.531927	0.449461	-0.375201	0
16690	16.69	-50.375	-68.562	-52.245	-25.729	4.55088	3.70433	2.85777	2.01122	1.16466	1.08001	0.995353	0.910697	0.826042	0.741386	0.656731	0.572076	0.48742	0.402765	0.318109	-0.528445	0
16710	16.71	-50.314	-69.201	-51.752	-25.389	4.57385	3.75027	2.92669	2.10311	1.27953	1.19717	1.11481	1.03245	0.950096	0.867738	0.78538	0.703022	0.620663	0.538305	0.455947	-0.367634	0
16730	16.73	-50.392	-67.983	-52.859	-25.768	4.54824	3.69906	2.84987	2.00068	1.15149	1.06657	0.98165	0.896731	0.811812	0.726893	0.641974	0.557055	0.472136	0.387218	0.302299	-0.546891	0
16750	16.75	-50.312	-68.446	-51.806	-25.782	4.5473	3.69716	2.84703	1.99689	1.14676	1.06174	0.976731	0.891718	0.806704	0.721691	0.636677	0.551663	0.46665	0.381636	0.296623	-0.553512	0
16770	16.77	-50.339	-68.466	-51.781	-25.554	4.5627	3.72797	2.89324	2.05851	1.22379	1.14031	1.05684	0.973366	0.889893	0.80642	0.722947	0.639474	0.556001	0.472528	0.389055	-0.445674	0
16790	16.79	-50.47	-68.98	-51.977	-26.421	4.50412	3.61081	2.7175	1.82419	0.93088	0.841549	0.752218	0.662886	0.573555	0.484224	0.394893	0.305562	0.216231	0.1269	0.0375689	-0.855742	0
16810	16.81	-50.587	-69.151	-52.576	-25.901	4.53926	3.68108	2.82291	1.96473	1.10656	1.02074	0.93492	0.849103	0.763285	0.677468	0.59165	0.505832	0.420015	0.334197	0.24838	-0.609796	0
16830	16.83	-50.796	-69.644	-52.441	-26.188	4.51987	3.6423	2.76473	1.88716	1.0096	0.921839	0.834082	0.746326	0.658569	0.570812	0.483055	0.395299	0.307542	0.219785	0.132028	-0.745539	0
16850	16.85	-51.071	-70.216	-52.689	-26.251	4.51561	3.63379	2.75196	1.87014	0.988312	0.90013	0.811947	0.723765	0.635582	0.5474	0.459218	0.371035	0.282853	0.19467	0.106488	-0.775337	0
16870	16.87	-51.207	-69.613	-53.024	-26.205	4.51872	3.64	2.76129	1.88257	1.00385	0.915981	0.828109	0.740238	0.652366	0.564495	0.476623	0.388751	0.30088	0.213008	0.125136	-0.75358	0
16890	16.89	-51.288	-70.243	-53.645	-25.853	4.5425	3.68757	2.83264	1.9777	1.12277	1.03728	0.951785	0.866292	0.780799	0.695305	0.609812	0.524319	0.438826	0.353332	0.267839	-0.587093	0
16910	16.91	-51.209	-69.638	-53.493	-26.096	4.52608	3.65473	2.78338	1.91203	1.04068	0.953542	0.866407	0.779272	0.692136	0.605001	0.517866	0.430731	0.343596	0.256461	0.169326	-0.702026	0
16930	16.93	-51.187	-69.657	-53.276	-26.35	4.50892	3.62041	2.73189	1.84338	0.954866	0.866015	0.777163	0.688312	0.599461	0.510609	0.421758	0.332907	0.244055	0.155204	0.0663527	-0.822161	0
16950	16.95	-50.991	-69.559	-52.424	-26.503	4.49858	3.59973	2.70088	1.80203	0.903177	0.813292	0.723407	0.633522	0.543636	0.453751	0.363866	0.273981	0.184096	0.0942108	0.00432565	-0.894526	0
16970	16.97	-50.823	-69.4	-51.996	-26.449	4.50223	3.60703	2.71183	1.81662	0.92142	0.8319	0.74238	0.652859	0.563339	0.473819	0.384299	0.294778	0.205258	0.115738	0.0262175	-0.868985	0
16990	16.99	-50.628	-68.802	-52.595	-26.42	4.50419	3.61095	2.7177	1.82446	0.931218	0.841893	0.752569	0.663245	0.57392	0.484596	0.395272	0.305947	0.216623	0.127299	0.0379743	-0.855269	0
17010	17.01	-50.547	-69.581	-52.262	-25.63	4.55757	3.7177	2.87784	2.03797	1.19811	1.11412	1.03014	0.94615	0.862163	0.778177	0.694191	0.610204	0.526218	0.442231	0.358245	-0.48162	0
17030	17.03	-50.321	-68.675	-52.194	-25.655	4.55588	3.71433	2.87277	2.03122	1.18966	1.10551	1.02135	0.937197	0.853042	0.768886	0.684731	0.600576	0.51642	0.432265	0.348109	-0.493445	0
17050	17.05	-50.323	-68.926	-51.976	-25.478	4.56784	3.73824	2.90865	2.07906	1.24946	1.1665	1.08354	1.00058	0.917623	0.834663	0.751704	0.668745	0.585785	0.502826	0.419866	-0.409728	0
17070	17.07	-50.449	-68.584	-52.452	-25.928	4.53743	3.67743	2.81743	1.95743	1.09743	1.01143	0.925434	0.839434	0.753434	0.667434	0.581434	0.495434	0.409434	0.323434	0.237434	-0.622566	0
17090	17.09	-50.521	-69.329	-52.034	-26.016	4.53149	3.66554	2.7996	1.93365	1.0677	0.981109	0.894515	0.80792	0.721326	0.634731	0.548136	0.461542	0.374947	0.288353	0.201758	-0.664188	0
17110	17.11	-50.644	-69.11	-52.662	-25.81	4.54541	3.69338	2.84135	1.98933	1.1373	1.0521	0.966893	0.881691	0.796488	0.711285	0.626082	0.54088	0.455677	0.370474	0.285272	-0.566755	0
17130	17.13	-50.726	-68.524	-52.726	-25.929	4.53737	3.6773	2.81723	1.95716	1.0971	1.01109	0.925082	0.839076	0.753069	0.667062	0.581055	0.495049	0.409042	0.323035	0.237028	-0.623039	0
17150	17.15	-50.815	-69.147	-52.518	-26.563	4.49453	3.59162	2.68872	1.78581	0.882907	0.792616	0.702326	0.612035	0.521745	0.431454	0.341163	0.250873	0.160582	0.0702919	-0.0199987	-0.922904	0
17170	17.17	-50.904	-69.734	-53.084	-25.984	4.53365	3.66987	2.80608	1.9423	1.07851	0.992136	0.905758	0.81938	0.733001	0.646623	0.560245	0.473866	0.387488	0.301109	0.214731	-0.649053	0
17190	17.19	-50.987	-68.568	-52.929	-26.043	4.52966	3.66189	2.79412	1.92635	1.05858	0.971805	0.885028	0.798251	0.711474	0.624697	0.53792	0.451143	0.364366	0.277589	0.190812	-0.676958	0
17210	17.21	-50.967	-69.062	-53.004	-26.253	4.51547	3.63351	2.75156	1.8696	0.987636	0.899441	0.811245	0.723049	0.634853	0.546657	0.458461	0.370265	0.282069	0.193873	0.105677	-0.776282	0
17230	17.23	-51.071	-70.055	-53.552	-26.247	4.51588	3.63433	2.75277	1.87122	0.989663	0.901508	0.813353	0.725197	0.637042	0.548886	0.460731	0.372576	0.28442	0.196265	0.108109	-0.773445	0
17250	17.25	-51.242	-69.501	-53.392	-26.784	4.4796	3.56176	2.64392	1.72608	0.808245	0.716461	0.624677	0.532893	0.441109	0.349326	0.257542	0.165758	0.0739743	-0.0178095	-0.109593	-1.02743	0
17270	17.27	-51.265	-69.518	-53.472	-26.254	4.51541	3.63338	2.75135	1.86933	0.987299	0.899096	0.810893	0.722691	0.634488	0.546285	0.458082	0.36988	0.281677	0.193474	0.105272	-0.776755	0
17290	17.29	-51.276	-69.606	-53.615	-26.61	4.49135	3.58527	2.67919	1.77311	0.867028	0.77642	0.685812	0.595204	0.504596	0.413988	0.32338	0.232772	0.142163	0.0515554	-0.0390527	-0.945134	0
17310	17.31	-51.312	-70.301	-53.618	-26.211	4.51831	3.63919	2.76007	1.88095	1.00183	0.913913	0.826001	0.738089	0.650177	0.562265	0.474353	0.386441	0.298528	0.210616	0.122704	-0.756418	0
17330	17.33	-51.459	-70.585	-53.105	-26.291	4.51291	3.62838	2.74385	1.85933	0.974799	0.886346	0.797893	0.709441	0.620988	0.532535	0.444082	0.35563	0.267177	0.178724	0.0902716	-0.794255	0
17350	17.35	-51.695	-70.335	-53.677	-26.943	4.46885	3.54027	2.61169	1.68311	0.754528	0.66167	0.568812	0.475954	0.383096	0.290238	0.19738	0.104522	0.0116635	-0.0811946	-0.174053	-1.10263	0
17370	17.37	-51.757	-70.624	-54.057	-26.739	4.48264	3.56784	2.65304	1.73824	0.823447	0.731968	0.640488	0.549008	0.457528	0.366049	0.274569	0.183089	0.0916094	0.000129706	-0.09135	-1.00615	0
17390	17.39	-51.704	-70.564	-53.528	-26.75	4.48189	3.56635	2.65081	1.73527	0.819731	0.728177	0.636623	0.545069	0.453515	0.361961	0.270407	0.178853	0.0872986	-0.00425543	-0.0958095	-1.01135	0
17410	17.41	-51.737	-69.878	-54.06	-26.61	4.49135	3.58527	2.67919	1.77311	0.867028	0.77642	0.685812	0.595204	0.504596	0.413988	0.32338	0.232772	0.142163	0.0515554	-0.0390527	-0.945134	0
17430	17.43	-51.563	-70.912	-53.578	-26.114	4.52487	3.6523	2.77973	1.90716	1.0346	0.947339	0.860082	0.772826	0.685569	0.598312	0.511055	0.423799	0.336542	0.249285	0.162028	-0.710539	0
17450	17.45	-51.578	-70.063	-53.87	-26.431	4.50345	3.60946	2.71547	1.82149	0.927501	0.838103	0.748704	0.659305	0.569907	0.480508	0.391109	0.301711	0.212312	0.122913	0.0335148	-0.860472	0
17470	17.47	-51.401	-70.494	-53.156	-26.133	4.52358	3.64973	2.77588	1.90203	1.02818	0.940792	0.853407	0.766022	0.678636	0.591251	0.503866	0.416481	0.329096	0.241711	0.154326	-0.719526	0
17490	17.49	-51.325	-70.642	-53.131	-26.082	4.52703	3.65662	2.78622	1.91581	1.04541	0.958366	0.871326	0.784285	0.697245	0.610204	0.523163	0.436123	0.349082	0.262042	0.175001	-0.695404	0
17510	17.51	-51.2	-68.435	-53.915	-26.755	4.48156	3.56568	2.6498	1.73392	0.818042	0.726454	0.634866	0.543278	0.451691	0.360103	0.268515	0.176927	0.0853392	-0.00624867	-0.0978365	-1.01371	0
17530	17.53	-51.025	-69.096	-53.251	-26.529	4.49683	3.59622	2.69561	1.795	0.894393	0.804332	0.714272	0.624211	0.53415	0.444089	0.354028	0.263968	0.173907	0.0838459	-0.00621489	-0.906823	0
17550	17.55	-50.842	-69.124	-51.901	-26.177	4.52061	3.64379	2.76696	1.89014	1.01331	0.92563	0.837947	0.750265	0.662582	0.5749	0.487218	0.399535	0.311853	0.22417	0.136488	-0.740337	0
17570	17.57	-50.58	-68.464	-52.31	-26.32	4.51095	3.62446	2.73797	1.85149	0.965001	0.876353	0.787704	0.699055	0.610407	0.521758	0.433109	0.344461	0.255812	0.167163	0.0785148	-0.807972	0
17590	17.59	-50.458	-69.467	-52.034	-25.409	4.5725	3.74757	2.92264	2.0977	1.27277	1.19028	1.10779	1.02529	0.942799	0.860305	0.777812	0.695319	0.612826	0.530332	0.447839	-0.377093	0
17610	17.61	-50.408	-68.702	-52.66	-25.382	4.57433	3.75122	2.92811	2.105	1.28189	1.19958	1.11727	1.03496	0.95265	0.870339	0.788028	0.705718	0.623407	0.541096	0.458785	-0.364323	0
17630	17.63	-50.396	-69.028	-51.966	-26.036	4.53014	3.66284	2.79554	1.92824	1.06095	0.974218	0.887488	0.800758	0.714028	0.627299	0.540569	0.453839	0.367109	0.28038	0.19365	-0.673647	0
17650	17.65	-50.456	-69.41	-52.52	-25.404	4.57284	3.74824	2.92365	2.09906	1.27446	1.192	1.10954	1.02708	0.944623	0.862163	0.779704	0.697245	0.614785	0.532326	0.449866	-0.374728	0
17670	17.67	-50.415	-68.865	-52.796	-25.261	4.5825	3.76757	2.95264	2.1377	1.32277	1.24128	1.15979	1.07829	0.996799	0.915305	0.833812	0.752319	0.670826	0.589332	0.507839	-0.307093	0
17690	17.69	-50.469	-68.968	-52.616	-26.045	4.52953	3.66162	2.79372	1.92581	1.05791	0.971116	0.884326	0.797535	0.710745	0.623954	0.537163	0.450373	0.363582	0.276792	0.190001	-0.677904	0
17710	17.71	-50.45	-68.206	-53.354	-26.026	4.53081	3.66419	2.79757	1.93095	1.06433	0.977663	0.891001	0.804339	0.717677	0.631015	0.544353	0.457691	0.371028	0.284366	0.197704	-0.668918	0
17730	17.73	-50.467	-68.874	-51.967	-26.195	4.51939	3.64135	2.76331	1.88527	1.00723	0.919427	0.831623	0.743819	0.656015	0.568211	0.480407	0.392603	0.304799	0.216995	0.129191	-0.74885	0
17750	17.75	-50.224	-68.27	-52.268	-26.088	4.52662	3.65581	2.785	1.91419	1.04338	0.956299	0.869218	0.782136	0.695055	0.607974	0.520893	0.433812	0.346731	0.25965	0.172569	-0.698242	0
17770	17.77	-50.194	-68.173	-52.531	-25.127	4.59156	3.78568	2.9798	2.17392	1.36804	1.28745	1.20687	1.12628	1.04569	0.965103	0.884515	0.803927	0.723339	0.642751	0.562163	-0.243715	0
17790	17.79	-50.197	-68.609	-52.125	-25.647	4.55642	3.71541	2.87439	2.03338	1.19237	1.10826	1.02416	0.940062	0.855961	0.771859	0.687758	0.603657	0.519555	0.435454	0.351353	-0.489661	0
17810	17.81	-50.186	-68.288	-52.012	-25.648	4.55635	3.71527	2.87419	2.03311	1.19203	1.10792	1.02381	0.939704	0.855596	0.771488	0.68738	0.603272	0.519163	0.435055	0.350947	-0.490134	0
17830	17.83	-50.415	-68.859	-52.091	-25.99	4.53324	3.66906	2.80487	1.94068	1.07649	0.990069	0.90365	0.817231	0.730812	0.644393	0.557974	0.471555	0.385136	0.298718	0.212299	-0.651891	0
17850	17.85	-50.509	-68.513	-52.851	-26.019	4.53129	3.66514	2.79899	1.93284	1.06669	0.980076	0.893461	0.806846	0.720231	0.633616	0.547001	0.460386	0.373772	0.287157	0.200542	-0.665607	0
17870	17.87	-50.639	-68.371	-53.284	-26.036	4.53014	3.66284	2.79554	1.92824	1.06095	0.974218	0.887488	0.800758	0.714028	0.627299	0.540569	0.453839	0.367109	0.28038	0.19365	-0.673647	0
17890	17.89	-50.848	-68.934	-53.087	-26.483	4.49993	3.60243	2.70493	1.80743	0.909934	0.820184	0.730434	0.640684	0.550934	0.461184	0.371434	0.281684	0.191934	0.102184	0.0124338	-0.885066	0
17910	17.91	-51.033	-69.266	-53.339	-26.606	4.49162	3.58581	2.68	1.77419	0.86838	0.777799	0.687218	0.596636	0.506055	0.415474	0.324893	0.234312	0.143731	0.05315	-0.0374311	-0.943242	0
17930	17.93	-51.079	-69.346	-53.244	-26.458	4.50162	3.60581	2.71	1.81419	0.91838	0.828799	0.739218	0.649636	0.560055	0.470474	0.380893	0.291312	0.201731	0.11215	0.0225689	-0.873242	0
17950	17.95	-51.166	-69.646	-53.361	-26.439	4.50291	3.60838	2.71385	1.81933	0.924799	0.835346	0.745893	0.656441	0.566988	0.477535	0.388082	0.29863	0.209177	0.119724	0.0302716	-0.864255	0
17970	17.97	-51.245	-69.765	-52.902	-26.478	4.50027	3.60311	2.70595	1.80879	0.911623	0.821907	0.732191	0.642474	0.552758	0.463042	0.373326	0.283609	0.193893	0.104177	0.0144608	-0.882701	0
17990	17.99	-51.15	-68.6	-53.221	-26.869	4.47385	3.55027	2.62669	1.70311	0.779528	0.68717	0.594812	0.502454	0.410096	0.317738	0.22538	0.133022	0.0406635	-0.0516946	-0.144053	-1.06763	0
18010	18.01	-51.096	-69.163	-52.979	-26.802	4.47838	3.55933	2.64027	1.72122	0.802163	0.710258	0.618353	0.526447	0.434542	0.342636	0.250731	0.158826	0.0669202	-0.0249852	-0.116891	-1.03594	0
18030	18.03	-50.801	-68.352	-53.292	-26.566	4.49433	3.59122	2.68811	1.785	0.881893	0.791582	0.701272	0.610961	0.52065	0.430339	0.340028	0.249718	0.159407	0.0690959	-0.0212149	-0.924323	0
18050	18.05	-50.734	-68.943	-52.609	-26.386	4.50649	3.61554	2.7246	1.83365	0.942704	0.853609	0.764515	0.67542	0.586326	0.497231	0.408136	0.319042	0.229947	0.140853	0.0517581	-0.839188	0
18070	18.07	-50.575	-68.202	-52.341	-26.463	4.50129	3.60514	2.70899	1.81284	0.916691	0.827076	0.737461	0.647846	0.558231	0.468616	0.379001	0.289386	0.199772	0.110157	0.0205419	-0.875607	0
18090	18.09	-50.37	-67.971	-51.946	-26.506	4.49838	3.59933	2.70027	1.80122	0.902163	0.812258	0.722353	0.632447	0.542542	0.452636	0.362731	0.272826	0.18292	0.0930148	0.00310944	-0.895945	0
18110	18.11	-50.29	-67.283	-52.315	-26.452	4.50203	3.60662	2.71122	1.81581	0.920407	0.830866	0.741326	0.651785	0.562245	0.472704	0.383163	0.293623	0.204082	0.114542	0.0250013	-0.870404	0
18130	18.13	-50.455	-68.223	-52.098	-26.173	4.52088	3.64433	2.76777	1.89122	1.01466	0.927008	0.839353	0.751697	0.664042	0.576386	0.488731	0.401076	0.31342	0.225765	0.138109	-0.738445	0
18150	18.15	-50.323	-68.596	-51.95	-26.218	4.51784	3.63824	2.75865	1.87906	0.999461	0.911501	0.823542	0.735582	0.647623	0.559663	0.471704	0.383745	0.295785	0.207826	0.119866	-0.759728	0
18170	18.17	-50.5	-67.823	-51.884	-26.476	4.50041	3.60338	2.70635	1.80933	0.912299	0.822596	0.732893	0.643191	0.553488	0.463785	0.374082	0.28438	0.194677	0.104974	0.0152716	-0.881755	0
18190	18.19	-50.595	-68.215	-52.6	-26.582	4.49324	3.58906	2.68487	1.78068	0.876488	0.786069	0.69565	0.605231	0.514812	0.424393	0.333974	0.243555	0.153136	0.0627175	-0.0277014	-0.931891	0
18210	18.21	-50.795	-68.618	-52.285	-26.831	4.47642	3.55541	2.63439	1.71338	0.792366	0.700265	0.608163	0.516062	0.423961	0.331859	0.239758	0.147657	0.0555554	-0.036546	-0.128647	-1.04966	0
18230	18.23	-50.798	-69.059	-52.691	-26.816	4.47743	3.55743	2.63743	1.71743	0.797434	0.705434	0.613434	0.521434	0.429434	0.337434	0.245434	0.153434	0.0614338	-0.0305662	-0.122566	-1.04257	0
18250	18.25	-51.009	-68.718	-52.628	-26.989	4.46574	3.53406	2.60237	1.67068	0.738988	0.645819	0.55265	0.459481	0.366312	0.273143	0.179974	0.0868054	-0.00636354	-0.0995325	-0.192701	-1.12439	0
18270	18.27	-50.944	-68.574	-51.98	-26.178	4.52054	3.64365	2.76676	1.88987	1.01297	0.925285	0.837596	0.749907	0.662218	0.574528	0.486839	0.39915	0.311461	0.223772	0.136082	-0.740809	0
18290	18.29	-50.902	-68.668	-52.8	-26.702	4.48514	3.57284	2.66054	1.74824	0.835947	0.744718	0.653488	0.562258	0.471028	0.379799	0.288569	0.197339	0.106109	0.0148797	-0.07635	-0.988647	0
18310	18.31	-50.939	-69.259	-53.067	-25.913	4.53845	3.67946	2.82047	1.96149	1.1025	1.0166	0.930704	0.844805	0.758907	0.673008	0.587109	0.501211	0.415312	0.329413	0.243515	-0.615472	0
18330	18.33	-51.07	-69.188	-52.998	-26.643	4.48912	3.58081	2.6725	1.76419	0.85588	0.765049	0.674218	0.583386	0.492555	0.401724	0.310893	0.220062	0.129231	0.0384	-0.0524311	-0.960742	0
18350	18.35	-50.96	-69.08	-53.053	-26.441	4.50277	3.60811	2.71345	1.81879	0.924123	0.834657	0.745191	0.655724	0.566258	0.476792	0.387326	0.297859	0.208393	0.118927	0.0294608	-0.865201	0
18370	18.37	-50.977	-68.798	-52.13	-27.215	4.45047	3.50351	2.55656	1.6096	0.662636	0.567941	0.473245	0.378549	0.283853	0.189157	0.0944608	-0.000235159	-0.0949311	-0.189627	-0.284323	-1.23128	0
18390	18.39	-50.841	-68.415	-52.407	-26.805	4.47818	3.55892	2.63966	1.72041	0.80115	0.709224	0.617299	0.525373	0.433447	0.341522	0.249596	0.15767	0.0657446	-0.0261811	-0.118107	-1.03736	0
18410	18.41	-50.764	-68.748	-51.885	-26.491	4.49939	3.60135	2.70331	1.80527	0.907231	0.817427	0.727623	0.637819	0.548015	0.458211	0.368407	0.278603	0.188799	0.0989946	0.00919052	-0.88885	0
18430	18.43	-50.683	-68.308	-52.661	-26.378	4.50703	3.61662	2.72622	1.83581	0.945407	0.856366	0.767326	0.678285	0.589245	0.500204	0.411163	0.322123	0.233082	0.144042	0.0550013	-0.835404	0
18450	18.45	-50.676	-68.298	-52.493	-27.013	4.46412	3.53081	2.5975	1.66419	0.73088	0.637549	0.544218	0.450886	0.357555	0.264224	0.170893	0.0775621	-0.0157689	-0.1091	-0.202431	-1.13574	0
18470	18.47	-50.666	-68.559	-52.734	-26.791	4.47912	3.56081	2.6425	1.72419	0.80588	0.714049	0.622218	0.530386	0.438555	0.346724	0.254893	0.163062	0.0712311	-0.0206	-0.112431	-1.03074	0
18490	18.49	-50.541	-66.816	-52.713	-26.66	4.48797	3.57851	2.66906	1.7596	0.850136	0.759191	0.668245	0.577299	0.486353	0.395407	0.304461	0.213515	0.122569	0.0316229	-0.059323	-0.968782	0
18510	18.51	-50.327	-67.906	-51.836	-26.511	4.49804	3.59865	2.69926	1.79987	0.900474	0.810535	0.720596	0.630657	0.540718	0.450778	0.360839	0.2709	0.180961	0.0910216	0.00108241	-0.898309	0
18530	18.53	-50.351	-67.378	-52.291	-27.058	4.46108	3.52473	2.58838	1.65203	0.715677	0.622042	0.528407	0.434772	0.341136	0.247501	0.153866	0.0602311	-0.0334041	-0.127039	-0.220674	-1.15703	0
18550	18.55	-50.291	-67.477	-52.171	-27.035	4.46264	3.52784	2.59304	1.65824	0.723447	0.629968	0.536488	0.443008	0.349528	0.256049	0.162569	0.0690892	-0.0243906	-0.11787	-0.21135	-1.14615	0
18570	18.57	-50.216	-67.171	-52.013	-26.992	4.46554	3.53365	2.60176	1.66987	0.737974	0.644785	0.551596	0.458407	0.365218	0.272028	0.178839	0.08565	-0.00753921	-0.100728	-0.193918	-1.12581	0
18590	18.59	-50.173	-66.764	-52.087	-27.173	4.45331	3.50919	2.56507	1.62095	0.676826	0.582413	0.488001	0.393589	0.299177	0.204765	0.110353	0.0159405	-0.0784716	-0.172884	-0.267296	-1.21142	0
18610	18.61	-50.273	-67.728	-52.472	-26.587	4.49291	3.58838	2.68385	1.77933	0.874799	0.784346	0.693893	0.603441	0.512988	0.422535	0.332082	0.24163	0.151177	0.0607243	-0.0297284	-0.934255	0
18630	18.63	-50.167	-67.081	-52.339	-26.265	4.51466	3.63189	2.74912	1.86635	0.983582	0.895305	0.807028	0.718751	0.630474	0.542197	0.45392	0.365643	0.277366	0.189089	0.100812	-0.781958	0
18650	18.65	-49.974	-67.55	-51.791	-26.476	4.50041	3.60338	2.70635	1.80933	0.912299	0.822596	0.732893	0.643191	0.553488	0.463785	0.374082	0.28438	0.194677	0.104974	0.0152716	-0.881755	0
18670	18.67	-49.948	-66.801	-51.97	-26.93	4.46973	3.54203	2.61433	1.68662	0.75892	0.66615	0.57338	0.480609	0.387839	0.295069	0.202299	0.109528	0.0167581	-0.0760122	-0.168782	-1.09649	0
18690	18.69	-49.983	-66.814	-52.175	-26.513	4.49791	3.59838	2.69885	1.79933	0.899799	0.809846	0.719893	0.629941	0.539988	0.450035	0.360082	0.27013	0.180177	0.0902243	0.000271598	-0.899255	0
18710	18.71	-49.998	-67.518	-52.121	-26.475	4.50047	3.60351	2.70656	1.8096	0.912636	0.822941	0.733245	0.643549	0.553853	0.464157	0.374461	0.284765	0.195069	0.105373	0.015677	-0.881282	0
18730	18.73	-50.039	-66.689	-52.063	-26.699	4.48534	3.57324	2.66115	1.74906	0.836961	0.745751	0.654542	0.563332	0.472123	0.380913	0.289704	0.198495	0.107285	0.0160757	-0.0751338	-0.987228	0
18750	18.75	-49.959	-66.549	-52.939	-26.534	4.49649	3.59554	2.6946	1.79365	0.892704	0.802609	0.712515	0.62242	0.532326	0.442231	0.352136	0.262042	0.171947	0.0818527	-0.00824192	-0.909188	0
18770	18.77	-50.086	-67.612	-51.637	-26.637	4.48953	3.58162	2.67372	1.76581	0.857907	0.767116	0.676326	0.585535	0.494745	0.403954	0.313163	0.222373	0.131582	0.0407919	-0.0499987	-0.957904	0
18790	18.79	-50.034	-66.952	-51.771	-26.894	4.47216	3.54689	2.62162	1.69635	0.771082	0.678555	0.586028	0.493501	0.400974	0.308447	0.21592	0.123393	0.0308662	-0.0616608	-0.154188	-1.07946	0
18810	18.81	-50.139	-67.151	-52.294	-27.015	4.46399	3.53054	2.5971	1.66365	0.730204	0.636859	0.543515	0.45017	0.356826	0.263481	0.170136	0.0767919	-0.0165527	-0.109897	-0.203242	-1.13669	0
18830	18.83	-50.135	-67.164	-52.17	-26.817	4.47737	3.5573	2.63723	1.71716	0.797096	0.705089	0.613082	0.521076	0.429069	0.337062	0.245055	0.153049	0.0610419	-0.0309649	-0.122972	-1.04304	0
18850	18.85	-50.191	-67.061	-51.595	-26.526	4.49703	3.59662	2.69622	1.79581	0.895407	0.805366	0.715326	0.625285	0.535245	0.445204	0.355163	0.265123	0.175082	0.0850419	-0.00499867	-0.905404	0
18870	18.87	-50.304	-67.382	-51.57	-26.699	4.48534	3.57324	2.66115	1.74906	0.836961	0.745751	0.654542	0.563332	0.472123	0.380913	0.289704	0.198495	0.107285	0.0160757	-0.0751338	-0.987228	0
18890	18.89	-50.298	-68.427	-52.022	-26.906	4.47135	3.54527	2.61919	1.69311	0.767028	0.67442	0.581812	0.489204	0.396596	0.303988	0.21138	0.118772	0.0261635	-0.0664446	-0.159053	-1.08513	0
18910	18.91	-50.221	-67.749	-52.33	-26.531	4.49669	3.59595	2.6952	1.79446	0.893718	0.803643	0.713569	0.623495	0.53342	0.443346	0.353272	0.263197	0.173123	0.0830486	-0.0070257	-0.907769	0
18930	18.93	-50.212	-67.327	-51.164	-26.314	4.51135	3.62527	2.73919	1.85311	0.967028	0.87842	0.789812	0.701204	0.612596	0.523988	0.43538	0.346772	0.258163	0.169555	0.0809473	-0.805134	0
18950	18.95	-50.234	-67.908	-51.53	-26.304	4.51203	3.62662	2.74122	1.85581	0.970407	0.881866	0.793326	0.704785	0.616245	0.527704	0.439163	0.350623	0.262082	0.173542	0.0850013	-0.800404	0
18970	18.97	-50.172	-67.804	-51.954	-26.264	4.51473	3.63203	2.74933	1.86662	0.98392	0.89565	0.80738	0.719109	0.630839	0.542569	0.454299	0.366028	0.277758	0.189488	0.101218	-0.781485	0
18990	18.99	-50.137	-68.051	-50.7	-27.012	4.46419	3.53095	2.5977	1.66446	0.731218	0.637893	0.544569	0.451245	0.35792	0.264596	0.171272	0.0779473	-0.0153771	-0.108701	-0.202026	-1.13527	0
19010	19.01	-49.95	-67.576	-51.899	-26.262	4.51487	3.6323	2.74973	1.86716	0.984596	0.896339	0.808082	0.719826	0.631569	0.543312	0.455055	0.366799	0.278542	0.190285	0.102028	-0.780539	0
19030	19.03	-49.942	-66.965	-52.177	-26.301	4.51223	3.62703	2.74183	1.85662	0.97142	0.8829	0.79438	0.705859	0.617339	0.528819	0.440299	0.351778	0.263258	0.174738	0.0862175	-0.798985	0
19050	19.05	-49.79	-66.112	-50.961	-26.976	4.46662	3.53581	2.605	1.67419	0.74338	0.650299	0.557218	0.464136	0.371055	0.277974	0.184893	0.0918121	-0.00126894	-0.09435	-0.187431	-1.11824	0
19070	19.07	-49.752	-66.198	-51.962	-26.665	4.48764	3.57784	2.66804	1.75824	0.848447	0.757468	0.666488	0.575508	0.484528	0.393549	0.302569	0.211589	0.120609	0.0296297	-0.06135	-0.971147	0
19090	19.09	-49.7	-66.866	-51.696	-26.406	4.50514	3.61284	2.72054	1.82824	0.935947	0.846718	0.757488	0.668258	0.579028	0.489799	0.400569	0.311339	0.222109	0.13288	0.04365	-0.848647	0
19110	19.11	-49.688	-66.233	-51.38	-26.64	4.48933	3.58122	2.67311	1.765	0.856893	0.766082	0.675272	0.584461	0.49365	0.402839	0.312028	0.221218	0.130407	0.0395959	-0.0512149	-0.959323	0
19130	19.13	-49.756	-67.157	-51.074	-27.011	4.46426	3.53108	2.59791	1.66473	0.731555	0.638238	0.54492	0.451603	0.358285	0.264968	0.17165	0.0783324	-0.0149852	-0.108303	-0.20162	-1.1348	0
19150	19.15	-49.795	-66.812	-51.252	-26.793	4.47899	3.56054	2.6421	1.72365	0.805204	0.713359	0.621515	0.52967	0.437826	0.345981	0.254136	0.162292	0.0704473	-0.0213973	-0.113242	-1.03169	0
19170	19.17	-49.763	-67.152	-51.28	-26.473	4.50061	3.60379	2.70696	1.81014	0.913312	0.82363	0.733947	0.644265	0.554582	0.4649	0.375218	0.285535	0.195853	0.10617	0.0164878	-0.880337	0
19190	19.19	-49.81	-66.447	-50.893	-27.188	4.4523	3.50716	2.56203	1.61689	0.671758	0.577245	0.482731	0.388218	0.293704	0.199191	0.104677	0.0101635	-0.08435	-0.178864	-0.273377	-1.21851	0
19210	19.21	-49.798	-66.729	-51.06	-26.854	4.47487	3.5523	2.62973	1.70716	0.784596	0.692339	0.600082	0.507826	0.415569	0.323312	0.231055	0.138799	0.0465419	-0.0457149	-0.137972	-1.06054	0
19230	19.23	-49.727	-66.601	-51.378	-26.481	4.50007	3.6027	2.70534	1.80797	0.910609	0.820873	0.731136	0.6414	0.551663	0.461927	0.372191	0.282454	0.192718	0.102981	0.0132446	-0.88412	0
19250	19.25	-49.641	-65.702	-51.571	-26.568	4.49419	3.59095	2.6877	1.78446	0.881218	0.790893	0.700569	0.610245	0.51992	0.429596	0.339272	0.248947	0.158623	0.0682986	-0.0220257	-0.925269	0
19270	19.27	-49.581	-66.441	-51.989	-26.532	4.49662	3.59581	2.695	1.79419	0.89338	0.803299	0.713218	0.623136	0.533055	0.442974	0.352893	0.262812	0.172731	0.08265	-0.0074311	-0.908242	0
19290	19.29	-49.593	-67.383	-51.528	-26.326	4.51054	3.62365	2.73676	1.84987	0.962974	0.874285	0.785596	0.696907	0.608218	0.519528	0.430839	0.34215	0.253461	0.164772	0.0760824	-0.810809	0
19310	19.31	-49.601	-66.643	-51.306	-26.161	4.52169	3.64595	2.7702	1.89446	1.01872	0.931143	0.843569	0.755995	0.66842	0.580846	0.493272	0.405697	0.318123	0.230549	0.142974	-0.732769	0
19330	19.33	-49.682	-67.129	-51.042	-26.609	4.49142	3.58541	2.67939	1.77338	0.867366	0.776765	0.686163	0.595562	0.504961	0.414359	0.323758	0.233157	0.142555	0.051954	-0.0386473	-0.944661	0
19350	19.35	-49.753	-66.674	-51.169	-26.672	4.48716	3.57689	2.66662	1.75635	0.846082	0.755055	0.664028	0.573001	0.481974	0.390947	0.29992	0.208893	0.117866	0.0268392	-0.0641879	-0.974458	0
19370	19.37	-49.796	-66.684	-51.039	-26.396	4.50581	3.61419	2.72257	1.83095	0.939326	0.850163	0.761001	0.671839	0.582677	0.493515	0.404353	0.315191	0.226028	0.136866	0.047704	-0.843918	0
19390	19.39	-49.827	-66.047	-51.544	-26.606	4.49162	3.58581	2.68	1.77419	0.86838	0.777799	0.687218	0.596636	0.506055	0.415474	0.324893	0.234312	0.143731	0.05315	-0.0374311	-0.943242	0
19410	19.41	-49.806	-65.718	-51.317	-27.063	4.46074	3.52406	2.58737	1.65068	0.713988	0.620319	0.52665	0.432981	0.339312	0.245643	0.151974	0.0583054	-0.0353635	-0.129032	-0.222701	-1.15939	0
19430	19.43	-50.022	-66.938	-51.213	-26.923	4.4702	3.54297	2.61574	1.68851	0.761285	0.668562	0.575839	0.483116	0.390393	0.29767	0.204947	0.112224	0.0195013	-0.0732216	-0.165945	-1.09317	0
19450	19.45	-49.976	-66.954	-51.624	-26.937	4.46926	3.54108	2.61291	1.68473	0.756555	0.663738	0.57092	0.478103	0.385285	0.292468	0.19965	0.106832	0.0140148	-0.0788027	-0.17162	-1.0998	0
19470	19.47	-49.994	-67.197	-51.246	-26.982	4.46622	3.535	2.60379	1.67257	0.741353	0.648231	0.555109	0.461988	0.368866	0.275745	0.182623	0.0895013	-0.00362029	-0.0967419	-0.189864	-1.12108	0
19490	19.49	-49.796	-66.785	-51.98	-26.719	4.48399	3.57054	2.6571	1.74365	0.830204	0.738859	0.647515	0.55617	0.464826	0.373481	0.282136	0.190792	0.0994473	0.00810268	-0.0832419	-0.996688	0
19510	19.51	-49.666	-65.9	-51.3	-26.833	4.47629	3.55514	2.63399	1.71284	0.791691	0.699576	0.607461	0.515346	0.423231	0.331116	0.239001	0.146886	0.0547716	-0.0373433	-0.129458	-1.05061	0
19530	19.53	-49.598	-66.15	-51.659	-26.983	4.46615	3.53487	2.60358	1.6723	0.741015	0.647886	0.554758	0.46163	0.368501	0.275373	0.182245	0.0891162	-0.00401219	-0.0971406	-0.190269	-1.12155	0
19550	19.55	-49.498	-66.029	-50.56	-26.609	4.49142	3.58541	2.67939	1.77338	0.867366	0.776765	0.686163	0.595562	0.504961	0.414359	0.323758	0.233157	0.142555	0.051954	-0.0386473	-0.944661	0
19570	19.57	-49.332	-66.093	-50.634	-26.776	4.48014	3.56284	2.64554	1.72824	0.810947	0.719218	0.627488	0.535758	0.444028	0.352299	0.260569	0.168839	0.0771094	-0.0146203	-0.10635	-1.02365	0
19590	19.59	-49.351	-65.192	-51.702	-26.914	4.47081	3.54419	2.61757	1.69095	0.764326	0.671663	0.579001	0.486339	0.393677	0.301015	0.208353	0.115691	0.0230284	-0.0696338	-0.162296	-1.08892	0
19610	19.61	-49.509	-66.235	-50.955	-26.392	4.50608	3.61473	2.72338	1.83203	0.940677	0.851542	0.762407	0.673272	0.584136	0.495001	0.405866	0.316731	0.227596	0.138461	0.0493257	-0.842026	0
19630	19.63	-49.402	-66.726	-50.739	-26.51	4.49811	3.59879	2.69946	1.80014	0.900812	0.81088	0.720947	0.631015	0.541082	0.45115	0.361218	0.271285	0.181353	0.0914202	0.00148781	-0.897837	0
19650	19.65	-49.652	-64.957	-51.898	-27.022	4.46351	3.5296	2.59568	1.66176	0.727839	0.634447	0.541055	0.447663	0.354272	0.26088	0.167488	0.0740959	-0.019296	-0.112688	-0.20608	-1.14	0
19670	19.67	-49.614	-65.517	-51.964	-26.697	4.48547	3.57351	2.66156	1.7496	0.837636	0.746441	0.655245	0.564049	0.472853	0.381657	0.290461	0.199265	0.108069	0.0168729	-0.074323	-0.986282	0
19690	19.69	-49.701	-66.172	-51.22	-26.579	4.49345	3.58946	2.68547	1.78149	0.877501	0.787103	0.696704	0.606305	0.515907	0.425508	0.335109	0.244711	0.154312	0.0639135	-0.0264852	-0.930472	0
19710	19.71	-49.864	-67.075	-51.658	-26.879	4.47318	3.54892	2.62466	1.70041	0.77615	0.683724	0.591299	0.498873	0.406447	0.314022	0.221596	0.12917	0.0367446	-0.0556811	-0.148107	-1.07236	0
19730	19.73	-49.893	-66.516	-52.155	-26.931	4.46966	3.54189	2.61412	1.68635	0.758582	0.665805	0.573028	0.480251	0.387474	0.294697	0.20192	0.109143	0.0163662	-0.0764108	-0.169188	-1.09696	0
19750	19.75	-49.855	-66.167	-51.755	-26.63	4.49	3.58257	2.67514	1.7677	0.860272	0.769528	0.678785	0.588042	0.497299	0.406555	0.315812	0.225069	0.134326	0.0435824	-0.0471608	-0.954593	0
19770	19.77	-49.827	-66.416	-52.081	-26.93	4.46973	3.54203	2.61433	1.68662	0.75892	0.66615	0.57338	0.480609	0.387839	0.295069	0.202299	0.109528	0.0167581	-0.0760122	-0.168782	-1.09649	0
19790	19.79	-49.782	-67.114	-51.581	-26.43	4.50351	3.6096	2.71568	1.82176	0.927839	0.838447	0.749055	0.659663	0.570272	0.48088	0.391488	0.302096	0.212704	0.123312	0.0339202	-0.859999	0
19810	19.81	-49.701	-66.464	-51.448	-27.032	4.46284	3.52824	2.59365	1.65906	0.724461	0.631001	0.537542	0.444082	0.350623	0.257163	0.163704	0.0702446	-0.0232149	-0.116674	-0.210134	-1.14473	0
19830	19.83	-49.774	-66.104	-51.507	-27.123	4.45669	3.51595	2.5752	1.63446	0.693718	0.599643	0.505569	0.411495	0.31742	0.223346	0.129272	0.0351973	-0.0588771	-0.152951	-0.247026	-1.18777	0
19850	19.85	-49.789	-66.188	-51.033	-27.151	4.4548	3.51216	2.56953	1.62689	0.684258	0.589995	0.495731	0.401468	0.307204	0.212941	0.118677	0.0244135	-0.06985	-0.164114	-0.258377	-1.20101	0
19870	19.87	-49.721	-65.573	-52.018	-27.081	4.45953	3.52162	2.58372	1.64581	0.707907	0.614116	0.520326	0.426535	0.332745	0.238954	0.145163	0.0513729	-0.0424176	-0.136208	-0.229999	-1.1679	0
19890	19.89	-49.863	-65.934	-51.71	-27.098	4.45838	3.51933	2.58027	1.64122	0.702163	0.608258	0.514353	0.420447	0.326542	0.232636	0.138731	0.0448257	-0.0490798	-0.142985	-0.236891	-1.17594	0
19910	19.91	-49.895	-66.403	-51.995	-26.887	4.47264	3.54784	2.62304	1.69824	0.773447	0.680968	0.588488	0.496008	0.403528	0.311049	0.218569	0.126089	0.0336094	-0.0588703	-0.15135	-1.07615	0
19930	19.93	-49.874	-66.513	-51.749	-26.906	4.47135	3.54527	2.61919	1.69311	0.767028	0.67442	0.581812	0.489204	0.396596	0.303988	0.21138	0.118772	0.0261635	-0.0664446	-0.159053	-1.08513	0
19950	19.95	-49.779	-65.911	-51.274	-27.052	4.46149	3.52554	2.5896	1.65365	0.717704	0.624109	0.530515	0.43692	0.343326	0.249731	0.156136	0.0625419	-0.0310527	-0.124647	-0.218242	-1.15419	0
19970	19.97	-49.71	-65.715	-51.9	-27.18	4.45284	3.50824	2.56365	1.61906	0.674461	0.580001	0.485542	0.391082	0.296623	0.202163	0.107704	0.0132446	-0.0812149	-0.175674	-0.270134	-1.21473	0
19990	19.99	-49.816	-66.918	-52.114	-27.086	4.45919	3.52095	2.5827	1.64446	0.706218	0.612393	0.518569	0.424745	0.33092	0.237096	0.143272	0.0494473	-0.0443771	-0.138201	-0.232026	-1.17027	0
20010	20.01	-49.838	-66.253	-52.398	-26.605	4.49169	3.58595	2.6802	1.77446	0.868718	0.778143	0.687569	0.596995	0.50642	0.415846	0.325272	0.234697	0.144123	0.0535486	-0.0370257	-0.942769	0
20030	20.03	-49.895	-66.364	-51.859	-27.258	4.44757	3.4977	2.54784	1.59797	0.648109	0.553123	0.458136	0.36315	0.268163	0.173177	0.0781905	-0.016796	-0.111782	-0.206769	-0.301755	-1.25162	0
20050	20.05	-49.806	-65.773	-51.598	-27.219	4.4502	3.50297	2.55574	1.60851	0.661285	0.566562	0.471839	0.377116	0.282393	0.18767	0.0929473	-0.0017757	-0.0964987	-0.191222	-0.285945	-1.23317	0
20070	20.07	-49.899	-66.589	-51.411	-27.23	4.44946	3.50149	2.55351	1.60554	0.657569	0.562772	0.467974	0.373177	0.27838	0.183582	0.0887851	-0.00601219	-0.100809	-0.195607	-0.290404	-1.23838	0
20090	20.09	-49.822	-66.084	-51.653	-27.253	4.44791	3.49838	2.54885	1.59933	0.649799	0.554846	0.459893	0.364941	0.269988	0.175035	0.0800824	-0.0148703	-0.109823	-0.204776	-0.299728	-1.24926	0
20110	20.11	-49.857	-66.022	-52.097	-27.079	4.45966	3.52189	2.58412	1.64635	0.708582	0.614805	0.521028	0.427251	0.333474	0.239697	0.14592	0.0521432	-0.0416338	-0.135411	-0.229188	-1.16696	0
20130	20.13	-49.754	-66.994	-52.476	-26.877	4.47331	3.54919	2.62507	1.70095	0.776826	0.684413	0.592001	0.499589	0.407177	0.314765	0.222353	0.129941	0.0375284	-0.0548838	-0.147296	-1.07142	0
20150	20.15	-49.831	-66.129	-51.875	-27.233	4.44926	3.50108	2.55291	1.60473	0.656555	0.561738	0.46692	0.372103	0.277285	0.182468	0.08765	-0.00716759	-0.101985	-0.196803	-0.29162	-1.2398	0
20170	20.17	-49.721	-66.72	-50.903	-27.155	4.45453	3.51162	2.56872	1.62581	0.682907	0.588616	0.494326	0.400035	0.305745	0.211454	0.117163	0.0228729	-0.0714176	-0.165708	-0.259999	-1.2029	0
20190	20.19	-49.751	-66.372	-51.209	-27.47	4.43324	3.46906	2.50487	1.54068	0.576488	0.480069	0.38365	0.287231	0.190812	0.0943932	-0.0020257	-0.0984446	-0.194864	-0.291282	-0.387701	-1.35189	0
20210	20.21	-49.742	-66.347	-51.379	-27.365	4.44034	3.48324	2.52615	1.56906	0.611961	0.516251	0.420542	0.324832	0.229123	0.133413	0.037704	-0.0580054	-0.153715	-0.249424	-0.345134	-1.30223	0
20230	20.23	-49.903	-66.574	-51.699	-27.25	4.44811	3.49879	2.54946	1.60014	0.650812	0.55588	0.460947	0.366015	0.271082	0.17615	0.0812175	-0.0137149	-0.108647	-0.20358	-0.298512	-1.24784	0
20250	20.25	-49.939	-65.615	-52.164	-27.738	4.41514	3.43284	2.45054	1.46824	0.485947	0.387718	0.289488	0.191258	0.0930284	-0.00520138	-0.103431	-0.201661	-0.299891	-0.39812	-0.49635	-1.47865	0
20270	20.27	-50.214	-67.034	-52.125	-27.918	4.40297	3.40851	2.41406	1.4196	0.425136	0.325691	0.226245	0.126799	0.0273527	-0.0720933	-0.171539	-0.270985	-0.370431	-0.469877	-0.569323	-1.56378	0
20290	20.29	-50.281	-67.062	-52.159	-27.503	4.43101	3.4646	2.49818	1.53176	0.565339	0.468697	0.372055	0.275413	0.178772	0.0821297	-0.0145122	-0.111154	-0.207796	-0.304438	-0.40108	-1.3675	0
20310	20.31	-50.431	-67.284	-51.567	-27.34	4.44203	3.48662	2.53122	1.57581	0.620407	0.524866	0.429326	0.333785	0.238245	0.142704	0.0471635	-0.0483771	-0.143918	-0.239458	-0.334999	-1.2904	0
20330	20.33	-50.338	-66.077	-52.682	-28.14	4.38797	3.37851	2.36906	1.3596	0.350136	0.249191	0.148245	0.0472986	-0.0536473	-0.154593	-0.255539	-0.356485	-0.457431	-0.558377	-0.659323	-1.66878	0
20350	20.35	-50.555	-67.461	-52.653	-27.39	4.43865	3.47987	2.52108	1.5623	0.603515	0.507636	0.411758	0.31588	0.220001	0.124123	0.0282446	-0.0676338	-0.163512	-0.259391	-0.355269	-1.31405	0
20370	20.37	-50.618	-67.562	-53.493	-27.763	4.41345	3.42946	2.44547	1.46149	0.477501	0.379103	0.280704	0.182305	0.0839067	-0.0144919	-0.112891	-0.211289	-0.309688	-0.408087	-0.506485	-1.49047	0
20390	20.39	-50.662	-67.433	-52.33	-28.216	4.38284	3.36824	2.35365	1.33906	0.324461	0.223001	0.121542	0.0200824	-0.0813771	-0.182837	-0.284296	-0.385755	-0.487215	-0.588674	-0.690134	-1.70473	0
20410	20.41	-50.516	-67.078	-52.763	-27.971	4.39939	3.40135	2.40331	1.40527	0.407231	0.307427	0.207623	0.107819	0.00801484	-0.0917892	-0.191593	-0.291397	-0.391201	-0.491005	-0.590809	-1.58885	0
20430	20.43	-50.647	-67.346	-52.667	-27.477	4.43277	3.46811	2.50345	1.53879	0.574123	0.477657	0.381191	0.284724	0.188258	0.0917919	-0.00467435	-0.101141	-0.197607	-0.294073	-0.390539	-1.3552	0
20450	20.45	-50.573	-66.388	-52.511	-28.139	4.38804	3.37865	2.36926	1.35987	0.350474	0.249535	0.148596	0.0476567	-0.0532825	-0.154222	-0.255161	-0.3561	-0.457039	-0.557978	-0.658918	-1.66831	0
20470	20.47	-50.504	-67.121	-52.609	-27.355	4.44101	3.4846	2.52818	1.57176	0.615339	0.519697	0.424055	0.328413	0.232772	0.13713	0.0414878	-0.0541541	-0.149796	-0.245438	-0.34108	-1.2975	0
20490	20.49	-50.506	-67.661	-52.009	-27.729	4.41574	3.43406	2.45237	1.47068	0.488988	0.390819	0.29265	0.194481	0.0963121	-0.00185678	-0.100026	-0.198195	-0.296364	-0.394532	-0.492701	-1.47439	0
20510	20.51	-50.365	-66.245	-51.948	-28.697	4.35034	3.30324	2.25615	1.20906	0.161961	0.0572513	-0.0474581	-0.152168	-0.256877	-0.361587	-0.466296	-0.571005	-0.675715	-0.780424	-0.885134	-1.93223	0
20530	20.53	-50.263	-67.149	-51.644	-28.165	4.38629	3.37514	2.36399	1.35284	0.341691	0.240576	0.139461	0.0383459	-0.0627689	-0.163884	-0.264999	-0.366114	-0.467228	-0.568343	-0.669458	-1.68061	0
20550	20.55	-50.059	-66.48	-51.063	-27.68	4.41906	3.44068	2.4623	1.48392	0.505542	0.407704	0.309866	0.212028	0.114191	0.0163527	-0.0814852	-0.179323	-0.277161	-0.374999	-0.472837	-1.45121	0
20570	20.57	-49.855	-66.098	-51.455	-27.454	4.43433	3.47122	2.50811	1.545	0.581893	0.485582	0.389272	0.292961	0.19665	0.100339	0.00402835	-0.0922825	-0.188593	-0.284904	-0.381215	-1.34432	0
20590	20.59	-49.676	-65.974	-51.899	-27.014	4.46406	3.53068	2.5973	1.66392	0.730542	0.637204	0.543866	0.450528	0.357191	0.263853	0.170515	0.077177	-0.0161608	-0.109499	-0.202837	-1.13621	0
20610	20.61	-49.643	-65.627	-51.011	-27.501	4.43115	3.46487	2.49858	1.5323	0.566015	0.469386	0.372758	0.27613	0.179501	0.0828729	-0.0137554	-0.110384	-0.207012	-0.303641	-0.400269	-1.36655	0
20630	20.63	-49.569	-66.053	-51.001	-27.14	4.45554	3.51365	2.57176	1.62987	0.687974	0.593785	0.499596	0.405407	0.311218	0.217028	0.122839	0.02865	-0.0655392	-0.159728	-0.253918	-1.19581	0
20650	20.65	-49.617	-65.592	-51.752	-27.216	4.45041	3.50338	2.55635	1.60933	0.662299	0.567596	0.472893	0.378191	0.283488	0.188785	0.0940824	-0.000620294	-0.095323	-0.190026	-0.284728	-1.23176	0
20670	20.67	-49.621	-65.437	-51.737	-27.214	4.45054	3.50365	2.55676	1.60987	0.662974	0.568285	0.473596	0.378907	0.284218	0.189528	0.0948392	0.000149976	-0.0945392	-0.189228	-0.283918	-1.23081	0
20690	20.69	-49.746	-66.417	-51.447	-27.322	4.44324	3.48906	2.53487	1.58068	0.626488	0.531069	0.43565	0.340231	0.244812	0.149393	0.0539743	-0.0414446	-0.136864	-0.232282	-0.327701	-1.28189	0
20710	20.71	-49.77	-65.884	-50.849	-27.739	4.41507	3.4327	2.45034	1.46797	0.485609	0.387373	0.289136	0.1909	0.0926635	-0.005573	-0.103809	-0.202046	-0.300282	-0.398519	-0.496755	-1.47912	0
20730	20.73	-49.699	-66.25	-51.103	-27.759	4.41372	3.43	2.44629	1.46257	0.478853	0.380481	0.282109	0.183738	0.0853662	-0.0130054	-0.111377	-0.209749	-0.30812	-0.406492	-0.504864	-1.48858	0
20750	20.75	-49.973	-65.628	-52.055	-27.517	4.43007	3.4627	2.49534	1.52797	0.560609	0.463873	0.367136	0.2704	0.173663	0.076927	-0.0198095	-0.116546	-0.213282	-0.310019	-0.406755	-1.37412	0
20770	20.77	-50.054	-66.381	-51.906	-27.61	4.42379	3.45014	2.47649	1.50284	0.529191	0.431826	0.334461	0.237096	0.139731	0.0423662	-0.0549987	-0.152364	-0.249728	-0.347093	-0.444458	-1.41811	0
20790	20.79	-50.134	-66.647	-51.627	-27.69	4.41838	3.43933	2.46027	1.48122	0.502163	0.404258	0.306353	0.208447	0.110542	0.0126365	-0.0852689	-0.183174	-0.28108	-0.378985	-0.476891	-1.45594	0
20810	20.81	-50.217	-65.506	-52.171	-27.952	4.40068	3.40392	2.40716	1.41041	0.41365	0.313974	0.214299	0.114623	0.0149473	-0.0847284	-0.184404	-0.28408	-0.383755	-0.483431	-0.583107	-1.57986	0
20830	20.83	-50.447	-67.014	-52.406	-27.58	4.42581	3.45419	2.48257	1.51095	0.539326	0.442163	0.345001	0.247839	0.150677	0.0535148	-0.0436473	-0.140809	-0.237972	-0.335134	-0.432296	-1.40392	0
20850	20.85	-50.459	-66.753	-52.486	-27.44	4.43527	3.47311	2.51095	1.54879	0.586623	0.490407	0.394191	0.297974	0.201758	0.105542	0.00932565	-0.0868906	-0.183107	-0.279323	-0.375539	-1.3377	0
20870	20.87	-50.522	-66.848	-52.56	-27.881	4.40547	3.41351	2.42156	1.4296	0.437636	0.338441	0.239245	0.140049	0.0408527	-0.0583433	-0.157539	-0.256735	-0.355931	-0.455127	-0.554323	-1.54628	0
20890	20.89	-50.672	-66.811	-53.337	-27.65	4.42108	3.44473	2.46838	1.49203	0.515677	0.418042	0.320407	0.222772	0.125136	0.0275013	-0.0701338	-0.167769	-0.265404	-0.363039	-0.460674	-1.43703	0
20910	20.91	-50.738	-66.787	-53.347	-28.712	4.34933	3.30122	2.25311	1.205	0.156893	0.0520824	-0.0527284	-0.157539	-0.26235	-0.367161	-0.471972	-0.576782	-0.681593	-0.786404	-0.891215	-1.93932	0
20930	20.93	-50.752	-67.095	-52.657	-28.453	4.36683	3.33622	2.30561	1.275	0.244393	0.141332	0.0382716	-0.0647892	-0.16785	-0.270911	-0.373972	-0.477032	-0.580093	-0.683154	-0.786215	-1.81682	0
20950	20.95	-50.871	-66.768	-52.333	-28.069	4.39277	3.38811	2.38345	1.37879	0.374123	0.273657	0.173191	0.0727243	-0.0277419	-0.128208	-0.228674	-0.329141	-0.429607	-0.530073	-0.630539	-1.6352	0
20970	20.97	-50.867	-67.592	-53.382	-27.738	4.41514	3.43284	2.45054	1.46824	0.485947	0.387718	0.289488	0.191258	0.0930284	-0.00520138	-0.103431	-0.201661	-0.299891	-0.39812	-0.49635	-1.47865	0
20990	20.99	-50.855	-66.56	-53.355	-27.973	4.39926	3.40108	2.40291	1.40473	0.406555	0.306738	0.20692	0.107103	0.00728511	-0.0925325	-0.19235	-0.292168	-0.391985	-0.491803	-0.59162	-1.5898	0
21010	21.01	-50.818	-68.001	-51.778	-27.865	4.40656	3.41568	2.4248	1.43392	0.443042	0.343954	0.244866	0.145778	0.0466905	-0.0523973	-0.151485	-0.250573	-0.349661	-0.448749	-0.547837	-1.53871	0
21030	21.03	-50.778	-67.218	-52.969	-28.408	4.36987	3.3423	2.31473	1.28716	0.259596	0.156839	0.0540824	-0.0486743	-0.151431	-0.254188	-0.356945	-0.459701	-0.562458	-0.665215	-0.767972	-1.79554	0
21050	21.05	-50.717	-66.991	-53.327	-27.67	4.41973	3.44203	2.46433	1.48662	0.50892	0.41115	0.31338	0.215609	0.117839	0.0200689	-0.0777014	-0.175472	-0.273242	-0.371012	-0.468782	-1.44649	0
21070	21.07	-50.854	-67.224	-53.222	-28.038	4.39487	3.3923	2.38973	1.38716	0.384596	0.284339	0.184082	0.0838257	-0.0164311	-0.116688	-0.216945	-0.317201	-0.417458	-0.517715	-0.617972	-1.62054	0
21090	21.09	-50.749	-66.665	-52.631	-28.148	4.38743	3.37743	2.36743	1.35743	0.347434	0.246434	0.145434	0.0444338	-0.0565662	-0.157566	-0.258566	-0.359566	-0.460566	-0.561566	-0.662566	-1.67257	0
21110	21.11	-50.775	-66.453	-53.143	-28.641	4.35412	3.31081	2.2675	1.22419	0.18088	0.0765486	-0.0277825	-0.132114	-0.236445	-0.340776	-0.445107	-0.549438	-0.653769	-0.7581	-0.862431	-1.90574	0
21130	21.13	-50.951	-67.504	-53.038	-28.515	4.36264	3.32784	2.29304	1.25824	0.223447	0.119968	0.0164878	-0.0869919	-0.190472	-0.293951	-0.397431	-0.500911	-0.604391	-0.70787	-0.81135	-1.84615	0
21150	21.15	-50.859	-67.456	-53.293	-28.573	4.35872	3.32	2.28129	1.24257	0.203853	0.0999811	-0.00389056	-0.107762	-0.211634	-0.315505	-0.419377	-0.523249	-0.62712	-0.730992	-0.834864	-1.87358	0
21170	21.17	-50.962	-68.009	-52.611	-27.994	4.39784	3.39824	2.39865	1.39906	0.399461	0.299501	0.199542	0.0995824	-0.000377051	-0.100337	-0.200296	-0.300255	-0.400215	-0.500174	-0.600134	-1.59973	0
21190	21.19	-50.849	-66.875	-53.465	-27.613	4.42358	3.44973	2.47588	1.50203	0.528177	0.430792	0.333407	0.236022	0.138636	0.0412513	-0.0561338	-0.153519	-0.250904	-0.348289	-0.445674	-1.41953	0
21210	21.21	-50.846	-66.899	-53.539	-28.335	4.3748	3.35216	2.32953	1.30689	0.284258	0.181995	0.0797311	-0.0225325	-0.124796	-0.227059	-0.329323	-0.431587	-0.53385	-0.636114	-0.738377	-1.76101	0
21230	21.23	-50.818	-67.287	-52.598	-28.245	4.38088	3.36433	2.34777	1.33122	0.314663	0.213008	0.111353	0.00969727	-0.0919581	-0.193614	-0.295269	-0.396924	-0.49858	-0.600235	-0.701891	-1.71844	0
21250	21.25	-50.885	-66.92	-53.281	-28.139	4.38804	3.37865	2.36926	1.35987	0.350474	0.249535	0.148596	0.0476567	-0.0532825	-0.154222	-0.255161	-0.3561	-0.457039	-0.557978	-0.658918	-1.66831	0
21270	21.27	-50.744	-66.97	-53.425	-28.034	4.39514	3.39284	2.39054	1.38824	0.385947	0.285718	0.185488	0.0852581	-0.0149716	-0.115201	-0.215431	-0.315661	-0.415891	-0.51612	-0.61635	-1.61865	0
21290	21.29	-50.763	-67.007	-53.499	-27.689	4.41845	3.43946	2.46047	1.48149	0.502501	0.404603	0.306704	0.208805	0.110907	0.0130081	-0.0848906	-0.182789	-0.280688	-0.378587	-0.476485	-1.45547	0
21310	21.31	-50.687	-67.055	-53.43	-27.748	4.41446	3.43149	2.44851	1.46554	0.482569	0.384272	0.285974	0.187677	0.0893797	-0.00891759	-0.107215	-0.205512	-0.303809	-0.402107	-0.500404	-1.48338	0
21330	21.33	-50.783	-68.307	-52.903	-27.895	4.40453	3.41162	2.41872	1.42581	0.432907	0.333616	0.234326	0.135035	0.0357446	-0.063546	-0.162837	-0.262127	-0.361418	-0.460708	-0.559999	-1.5529	0
21350	21.35	-50.794	-67.471	-53.031	-27.718	4.41649	3.43554	2.4546	1.47365	0.492704	0.394609	0.296515	0.19842	0.100326	0.00223106	-0.0958635	-0.193958	-0.292053	-0.390147	-0.488242	-1.46919	0
21370	21.37	-50.638	-67.918	-53.14	-27.402	4.43784	3.47824	2.51865	1.55906	0.599461	0.503501	0.407542	0.311582	0.215623	0.119663	0.023704	-0.0722554	-0.168215	-0.264174	-0.360134	-1.31973	0
21390	21.39	-50.622	-67.453	-53.107	-27.819	4.40966	3.42189	2.43412	1.44635	0.458582	0.359805	0.261028	0.162251	0.0634743	-0.0353027	-0.13408	-0.232857	-0.331634	-0.430411	-0.529188	-1.51696	0
21410	21.41	-50.604	-66.903	-53.177	-28.194	4.38433	3.37122	2.35811	1.345	0.331893	0.230582	0.129272	0.0279608	-0.07335	-0.174661	-0.275972	-0.377282	-0.478593	-0.579904	-0.681215	-1.69432	0
21430	21.43	-50.65	-66.91	-52.716	-28.249	4.38061	3.36379	2.34696	1.33014	0.313312	0.21163	0.109947	0.00826484	-0.0934176	-0.1951	-0.296782	-0.398465	-0.500147	-0.60183	-0.703512	-1.72034	0
21450	21.45	-50.637	-67.301	-52.922	-27.614	4.42351	3.4496	2.47568	1.50176	0.527839	0.430447	0.333055	0.235663	0.138272	0.0408797	-0.0565122	-0.153904	-0.251296	-0.348688	-0.44608	-1.42	0
21470	21.47	-50.545	-66.202	-53.251	-27.828	4.40906	3.42068	2.4323	1.44392	0.455542	0.356704	0.257866	0.159028	0.0601905	-0.0386473	-0.137485	-0.236323	-0.335161	-0.433999	-0.532837	-1.52121	0
21490	21.49	-50.69	-67.683	-52.574	-27.478	4.4327	3.46797	2.50324	1.53851	0.573785	0.477312	0.380839	0.284366	0.187893	0.0914202	-0.00505273	-0.101526	-0.197999	-0.294472	-0.390945	-1.35567	0
21510	21.51	-50.476	-67.033	-52.911	-28.238	4.38135	3.36527	2.34919	1.33311	0.317028	0.21542	0.113812	0.012204	-0.0894041	-0.191012	-0.29262	-0.394228	-0.495837	-0.597445	-0.699053	-1.71513	0
21530	21.53	-50.496	-66.521	-52.758	-27.834	4.40865	3.41987	2.43108	1.4423	0.453515	0.354636	0.255758	0.15688	0.0580013	-0.0408771	-0.139755	-0.238634	-0.337512	-0.436391	-0.535269	-1.52405	0
21550	21.55	-50.6	-67.225	-52.515	-27.545	4.42818	3.45892	2.48966	1.52041	0.55115	0.454224	0.357299	0.260373	0.163447	0.0665216	-0.0304041	-0.12733	-0.224255	-0.321181	-0.418107	-1.38736	0
21570	21.57	-50.714	-66.719	-52.411	-28.114	4.38973	3.38203	2.37433	1.36662	0.35892	0.25815	0.15738	0.0566094	-0.0441608	-0.144931	-0.245701	-0.346472	-0.447242	-0.548012	-0.648782	-1.65649	0
21590	21.59	-50.696	-67.008	-52.318	-28.395	4.37074	3.34406	2.31737	1.29068	0.263988	0.161319	0.05865	-0.0440189	-0.146688	-0.249357	-0.352026	-0.454695	-0.557364	-0.660032	-0.762701	-1.78939	0
21610	21.61	-50.703	-66.943	-53.131	-28.158	4.38676	3.37608	2.36541	1.35473	0.344055	0.242988	0.14192	0.0408527	-0.0602149	-0.161282	-0.26235	-0.363418	-0.464485	-0.565553	-0.66662	-1.6773	0
21630	21.63	-50.785	-67.587	-52.717	-28.182	4.38514	3.37284	2.36054	1.34824	0.335947	0.234718	0.133488	0.0322581	-0.0689716	-0.170201	-0.271431	-0.372661	-0.473891	-0.57512	-0.67635	-1.68865	0
21650	21.65	-50.808	-67.081	-53.159	-28.336	4.37473	3.35203	2.32933	1.30662	0.28392	0.18165	0.0793797	-0.0228906	-0.125161	-0.227431	-0.329701	-0.431972	-0.534242	-0.636512	-0.738782	-1.76149	0
21670	21.67	-50.759	-67.507	-52.836	-27.907	4.40372	3.41	2.41629	1.42257	0.428853	0.329481	0.230109	0.130738	0.0313662	-0.0680054	-0.167377	-0.266749	-0.36612	-0.465492	-0.564864	-1.55858	0
21690	21.69	-50.776	-66.731	-53.319	-28.031	4.39534	3.39324	2.39115	1.38906	0.386961	0.286751	0.186542	0.0863324	-0.0138771	-0.114087	-0.214296	-0.314505	-0.414715	-0.514924	-0.615134	-1.61723	0
21710	21.71	-50.657	-66.645	-52.258	-28.353	4.37358	3.34973	2.32588	1.30203	0.278177	0.175792	0.0734067	-0.0289784	-0.131364	-0.233749	-0.336134	-0.438519	-0.540904	-0.643289	-0.745674	-1.76953	0
21730	21.73	-50.789	-67.697	-52.459	-28.192	4.38446	3.37149	2.35851	1.34554	0.332569	0.231272	0.129974	0.028677	-0.0726203	-0.173918	-0.275215	-0.376512	-0.477809	-0.579107	-0.680404	-1.69338	0
21750	21.75	-50.578	-66.421	-52.053	-28.623	4.35534	3.31324	2.27115	1.22906	0.186961	0.0827513	-0.0214581	-0.125668	-0.229877	-0.334087	-0.438296	-0.542505	-0.646715	-0.750924	-0.855134	-1.89723	0
21770	21.77	-50.486	-66.727	-52.536	-28.095	4.39101	3.3846	2.37818	1.37176	0.365339	0.264697	0.164055	0.0634135	-0.0372284	-0.13787	-0.238512	-0.339154	-0.439796	-0.540438	-0.64108	-1.6475	0
21790	21.79	-50.407	-66.977	-52.432	-28.573	4.35872	3.32	2.28129	1.24257	0.203853	0.0999811	-0.00389056	-0.107762	-0.211634	-0.315505	-0.419377	-0.523249	-0.62712	-0.730992	-0.834864	-1.87358	0
21810	21.81	-50.516	-67.141	-52.569	-28.146	4.38757	3.3777	2.36784	1.35797	0.348109	0.247123	0.146136	0.04515	-0.0558365	-0.156823	-0.257809	-0.358796	-0.459782	-0.560769	-0.661755	-1.67162	0
21830	21.83	-50.283	-66.814	-51.754	-27.876	4.40581	3.41419	2.42257	1.43095	0.439326	0.340163	0.241001	0.141839	0.042677	-0.0564852	-0.155647	-0.254809	-0.353972	-0.453134	-0.552296	-1.54392	0
21850	21.85	-50.334	-66.562	-52.769	-27.414	4.43703	3.47662	2.51622	1.55581	0.595407	0.499366	0.403326	0.307285	0.211245	0.115204	0.0191635	-0.0768771	-0.172918	-0.268958	-0.364999	-1.3254	0
21870	21.87	-50.345	-66.172	-52.484	-27.586	4.42541	3.45338	2.48135	1.50933	0.537299	0.440096	0.342893	0.245691	0.148488	0.0512851	-0.0459176	-0.14312	-0.240323	-0.337526	-0.434728	-1.40676	0
21890	21.89	-50.313	-66.784	-52.283	-27.88	4.40554	3.41365	2.42176	1.42987	0.437974	0.338785	0.239596	0.140407	0.0412175	-0.0579716	-0.157161	-0.25635	-0.355539	-0.454728	-0.553918	-1.54581	0
21910	21.91	-50.083	-66.033	-51.687	-28.307	4.37669	3.35595	2.3352	1.31446	0.293718	0.191643	0.0895689	-0.0125054	-0.11458	-0.216654	-0.318728	-0.420803	-0.522877	-0.624951	-0.727026	-1.74777	0
21930	21.93	-50.213	-65.668	-52.884	-27.848	4.4077	3.41797	2.42824	1.43851	0.448785	0.349812	0.250839	0.151866	0.0528932	-0.0460798	-0.145053	-0.244026	-0.342999	-0.441972	-0.540945	-1.53067	0
21950	21.95	-50.196	-65.763	-52.57	-27.901	4.40412	3.41081	2.4175	1.42419	0.43088	0.331549	0.232218	0.132886	0.0335554	-0.0657757	-0.165107	-0.264438	-0.363769	-0.4631	-0.562431	-1.55574	0
21970	21.97	-50.231	-66.721	-52.487	-27.656	4.42068	3.44392	2.46716	1.49041	0.51365	0.415974	0.318299	0.220623	0.122947	0.0252716	-0.0724041	-0.17008	-0.267755	-0.365431	-0.463107	-1.43986	0
21990	21.99	-50.09	-65.868	-52.834	-28.038	4.39487	3.3923	2.38973	1.38716	0.384596	0.284339	0.184082	0.0838257	-0.0164311	-0.116688	-0.216945	-0.317201	-0.417458	-0.517715	-0.617972	-1.62054	0
References
1. Tarasov, P., Peyron, O., Guiot, J., Brewer, S., Volkova, V., Bezusko, L., Dorofeyuk, N., Kvavadze, E., Osipova, I., and Panova, N.: Last Glacial Maximum climate of the former Soviet Union and Mongolia reconstructed from pollen and plant macrofossil data: Clim. Dyn., v. 15, no. 3, p. 227-240, https://doi.org/10.1007/s003820050278, 1999.
2. Tierney, J. E., Zhu, J., King, J., Malevich, S. B., Hakim, G. J., & Poulsen, C. J.: Glacial cooling and climate sensitivity revisited, https://doi.org/10.1038/s41586-020-2617-x, Nature, 584(7822), 569-573, 2020.
3. Annan, J. D., & Hargreaves, J. C.: A new global reconstruction of temperature changes at the Last Glacial Maximum, Climate of the Past, 9(1), 367-376, https://doi.org/10.5194/cp-9-367-2013, 2013.
4. Cane, M. A., Braconnot, P., Clement, A., Gildor, H., Joussaume, S., Kageyama, M., ... & Zorita, E.: Progress in paleoclimate modeling,Journal of Climate, 19(20), 5031-5057, https://doi.org/10.1175/JCLI3899.1, 2006
5. Buizert, C., Keisling, B., Box, J., He, F., Carlson, A., Sinclair, G., and DeConto, R.: Greenland‐wide seasonal temperatures during the last deglaciation: Geophys. Res. Lett., v. 45, no. 4, p. 1905-1914, https://doi.org/10.1002/2017GL075601, 2018,

## Sheet: (5) PPT by 100yr
Monthly precipitation data in Jargalant and Ih Artsan valley since 20 ka
*Data downloaded as raster map from CHELSA (Karger et al,, 2021)
Karger, D. N., Nobis, M. P., Normand, S., Graham, C. H., & Zimmermann, N. E.: CHELSA-TraCE21k v1. 0. Downscaled transient temperature and precipitation data since the last glacial maximum. Climate of the Past Discussions, 1-27, https://doi.org/10.5194/cp-2021-30, 2021.
*Precipitation type is considered as snow, when summer T is below 0 ℃.
	(ka)	Jan	Feb	Mar	Apr	May	Jun	Jul	Aug	Sep	Oct	Nov	Dec	Average annual precipitation (during 100 yr), mm	Average annual snow acc (during 100 yr), mm	Summer PPT %
16000	16	3	3	6	12	17	45.5	54.5	40.5	26	12	3	2	224.5	84	0.625835
16100	16.1	3	3	6	13	18	46.5	48.5	41.5	23	11	3	2	218.5	82	0.624714
16200	16.2	3	3	6	13	19.5	44.5	54.5	43	25.5	11	3	2	228	86	0.622807
16300	16.3	3	3	6	13	17	44.5	59.5	39	22	10.5	3	2	222.5	79.5	0.642697
16400	16.4	3	4	6	13	18	50	55.5	40.5	23.5	11	3	2	229.5	83.5	0.636166
16500	16.5	3	3	6	13	18	47.5	56	41.5	22	11	3	2	226	81	0.641593
16600	16.6	3	3	6	13	18	44.5	48.5	32	22	10	3	2	205	80	0.609756
16700	16.7	3	3	6	12	17	51.5	57.5	36.5	20	10	3	2	221.5	76	0.656885
16800	16.8	3	3	6	12	18	49.5	58.5	39.5	24	10	3	2	228.5	81	0.645514
16900	16.9	3	3	6	13	18	48.5	49.5	39.5	20	10.5	3	2	216	78.5	0.636574
17000	17	3	3	6	13	17.5	47	53.5	37.5	24.5	10	3	2	220	82	0.627273
17100	17.1	3	3	6	13	18.5	53.5	52.5	39	22	11	3	2	226.5	81.5	0.640177
17200	17.2	3	3	6	13	19	48	56	38.5	22	10	3	2	223.5	81	0.637584
17300	17.3	3	3	6	12	18.5	49	48.5	37.5	22	10	3	2	214.5	79.5	0.629371
17400	17.4	3	3	6	13	19	53	50.5	43.5	22	10	3	2	228	81	0.644737
17500	17.5	3	3	6	12	17	44.5	50	43.5	22	10	3	2	216	78	0.638889
17600	17.6	3	3	6	12	17	48.5	50.5	41.5	23	10	3	2	219.5	79	0.640091
17700	17.7	3	3	6	13	19	49.5	60.5	38	24	9	3	2	230	82	0.643478
17800	17.8	3	3	6	12.5	17	44	51.5	37.5	26	11	3	2	216.5	83.5	0.614319
17900	17.9	3	3	6	12	18	42.5	54.5	39	22	10	3	2	215	79	0.632558
18000	18	3	3	6	13	17	53.5	53.5	40.5	24	10	3	2	228.5	81	0.645514
18100	18.1	3	3	6	12	18.5	56	59.5	36.5	22	10	3	2	231.5	79.5	0.656587
18200	18.2	3	3	6	12	17.5	52.5	56.5	37.5	27	10	3	2	230	83.5	0.636957
18300	18.3	3	3	6	13	20	50	54	37	25	10	3	2	226	85	0.623894
18400	18.4	3	3	6	13	18.5	47.5	50.5	40.5	27	10	3	2	224	85.5	0.618304
18500	18.5	3	3	6	12	18	44.5	53	40.5	23	10	3	2	218	80	0.633028
18600	18.6	3	3	6	12	18	42.5	46.5	41.5	21	10	3	2	208.5	78	0.625899
18700	18.7	3	3	6	12	17.5	47	56.5	39.5	22	9	3	2	220.5	77.5	0.648526
18800	18.8	3	3	6	12	17	47	49.5	40	25.5	10	3	2	218	81.5	0.626147
18900	18.9	3	3	6	12	17	49.5	53.5	44.5	23	10	3	2	226.5	79	0.651214
19000	19	3	3	6	13	18	56	52.5	34.5	22	10	3	2	223	80	0.641256
19100	19.1	3	3	6	12	17.5	51	55.5	37	22	10	3	2	222	78.5	0.646396
19200	19.2	3	4	6	12	18	51.5	55.5	37.5	21	10	3	2	223.5	79	0.646532
19300	19.3	3	3	6	12	18	46.5	55	42.5	24	9	3	2	224	80	0.642857
19400	19.4	3	3	6	12	17.5	49.5	52.5	40.5	25	10	3	2	224	81.5	0.636161
19500	19.5	3	3	6	12	17	53.5	57.5	38.5	25	10	3	2	230.5	81	0.64859
19600	19.6	3	3	6	12	18	51.5	54.5	33.5	25	9	3	2	220.5	81	0.632653
19700	19.7	3	3	6	12	18	52.5	55.5	41.5	24	9.5	3	2	230	80.5	0.65
19800	19.8	3	3	6	12	18.5	44.5	50.5	41.5	24	10	3	2	218	81.5	0.626147
19900	19.9	3	3	6	12	18	50.5	46.5	38.5	21	8	3	2	211.5	76	0.640662
20000	20	3	3	6	11	18	48.5	51.5	38.5	26	9	3	2	219.5	81	0.630979
20100	20.1	3	3	6	11	18	48.5	51.5	38.5	26	9	3	2	219.5	81	0.630979
20200	20.2	3	3	6	11	18	48.5	51.5	38.5	26	9	3	2	219.5	81	0.630979
20300	20.3	3	3	6	11	18	48.5	51.5	38.5	26	9	3	2	219.5	219.5	0.630979
20400	20.4	3	3	6	11	18	48.5	51.5	38.5	26	9	3	2	219.5	219.5	0.630979
20500	20.5	3	3	6	11	18	48.5	51.5	38.5	26	9	3	2	219.5	219.5	0.630979
20600	20.6	3	3	6	11	18	48.5	51.5	38.5	26	9	3	2	219.5	81	0.630979
20700	20.7	3	3	6	11	18	48.5	51.5	38.5	26	9	3	2	219.5	81	0.630979
20800	20.8	3	3	6	11	18	48.5	51.5	38.5	26	9	3	2	219.5	81	0.630979
20900	20.9	3	3	6	11	18	48.5	51.5	38.5	26	9	3	2	219.5	219.5	0.630979
21000	21	3	3	6	11	18	48.5	51.5	38.5	26	9	3	2	219.5	219.5	0.630979
21100	21.1	3	3	6	11	18	48.5	51.5	38.5	26	9	3	2	219.5	219.5	0.630979
21200	21.2	3	3	6	11	18	48.5	51.5	38.5	26	9	3	2	219.5	219.5	0.630979
21300	21.3	3	3	6	11	18	48.5	51.5	38.5	26	9	3	2	219.5	81	0.630979
21400	21.4	3	3	6	11	18	48.5	51.5	38.5	26	9	3	2	219.5	219.5	0.630979
21500	21.5	3	3	6	11	18	48.5	51.5	38.5	26	9	3	2	219.5	219.5	0.630979
21600	21.6	3	3	6	11	18	48.5	51.5	38.5	26	9	3	2	219.5	219.5	0.630979
21700	21.7	3	3	6	11	18	48.5	51.5	38.5	26	9	3	2	219.5	219.5	0.630979
21800	21.8	3	3	6	11	18	48.5	51.5	38.5	26	9	3	2	219.5	219.5	0.630979
21900	21.9	3	3	6	11	18	48.5	51.5	38.5	26	9	3	2	219.5	219.5	0.630979
22000	22	3	3	6	11	18	48.5	51.5	38.5	26	9	3	2	219.5	219.5	0.630979
For 22 to 20.1 ka, we used the same value with 20 ka

## Sheet: (6) Altitudes
Reference altitude information used for 2D ice surface model
