# Supplementary material for: Asynchronous glacial dynamics of Last Glacial Maximum mountain glaciers in the Ikh Bogd Massif, Gobi Altai mountain range, southwestern Mongolia: aspect control on glacier mass balance
Source: Copernicus journal article supplement (doi:10.5194/tc-17-2409-2023), 2023-06-21
Supplement: Supplementary file 1 [file tc-17-2409-2023-supplement.zip › Supplementary 2_ 2D ice surface modelling result_221128.xlsx]

## Sheet: (0) Read me
Abbreviations
IA	Ih Artsan valley
JAR	Jargalant valley
Modelling range (in Fig. 7)
Profile of Ih Artsan	Polyline
Profile of Jargalant	Polyline
Ih Artsan valley	Polygon
Jargalant valley	Polygon
Study area	DEM
Scenario
Synchronous (Synch)	Considering the present-day temperatures in Ih Artsan and Jargalant is the same.
Asynchronous (Asynch)	Considering the present-day temperature in Jargalant (north-facing valley) is 0.5 ℃ lower than Ih Artsan's (south-facing valley).
* In both scenario LGM summer temperature anomaly (-5.5 ℃) is the same.

## Sheet: (1) 2D Insolation
Modern temperature (at headwall):			5.40 ℃
Elevation of the distal moraine:			3222.17 m
Basal shear stress of initial glacier:			100 kPa
Time interval:			22-16 ka
Insolation along profile of Ih Artsan valley (WH m-2)											Insolation along profile of Jargalant valley (WH m-2)
22-21 ka	21-20 ka	20-19 ka	19-18 ka	18-17 ka	17-16 ka	22-16 ka	June 21, 22 ka	June 21, 20 ka	June 21, the present-day		22-21 ka	21-20 ka	20-19 ka	19-18 ka	18-17 ka	17-16 ka	22-16 ka	June 21, 22 ka	June 21, 20 ka	June 21, the present-day
3.41866e+07	3.41693e+07	3.41222e+07	3.40526e+07	3.39699e+07	3.38871e+07	2.01047e+08	8117.01	8155.97	8219.65		3.29046e+07	3.28902e+07	3.28469e+07	3.27817e+07	3.27032e+07	3.26241e+07	1.93535e+08	7797.38	7834.79	7895.14
3.38188e+07	3.38014e+07	3.3754e+07	3.36842e+07	3.3601e+07	3.3517e+07	1.98872e+08	8044.23	8083.05	8146.48		3.14764e+07	3.14634e+07	3.14211e+07	3.13565e+07	3.12784e+07	3.11997e+07	1.8512e+08	7511.33	7550.86	7612.27
3.36165e+07	3.35985e+07	3.35506e+07	3.34799e+07	3.33954e+07	3.33102e+07	1.97667e+08	8002.73	8040.57	8102.99		3.02686e+07	3.02568e+07	3.02155e+07	3.01514e+07	3.00732e+07	2.99939e+07	1.78002e+08	7263.2	7303.58	7364.98
3.35075e+07	3.34889e+07	3.34402e+07	3.33682e+07	3.32824e+07	3.31959e+07	1.9701e+08	7979.51	8015.91	8076.89		2.9352e+07	2.93411e+07	2.92998e+07	2.92353e+07	2.91569e+07	2.90774e+07	1.72595e+08	7072.66	7113.1	7173.93
3.33842e+07	3.33654e+07	3.33159e+07	3.32429e+07	3.3156e+07	3.30685e+07	1.96272e+08	7954.61	7989.94	8049.73		2.86883e+07	2.86792e+07	2.86395e+07	2.85759e+07	2.84979e+07	2.84187e+07	1.68696e+08	6937.92	6979.07	7040.13
3.3108e+07	3.30897e+07	3.30406e+07	3.29679e+07	3.28813e+07	3.2794e+07	1.94647e+08	7902.22	7939.04	8000.22		2.80999e+07	2.8092e+07	2.80533e+07	2.79904e+07	2.79131e+07	2.78345e+07	1.65238e+08	6820.96	6863.86	6926.19
3.28232e+07	3.28059e+07	3.27576e+07	3.26857e+07	3.25995e+07	3.25128e+07	1.92978e+08	7848.29	7887.08	7950.09		2.76468e+07	2.76401e+07	2.76023e+07	2.75404e+07	2.74636e+07	2.73857e+07	1.62577e+08	6729.05	6772.79	6835.61
3.24544e+07	3.24409e+07	3.23964e+07	3.2328e+07	3.2245e+07	3.2161e+07	1.90855e+08	7783.32	7827.83	7896.09		2.73276e+07	2.73221e+07	2.72854e+07	2.72246e+07	2.71487e+07	2.70712e+07	1.60709e+08	6662.8	6706.48	6769.03
3.20701e+07	3.20643e+07	3.20272e+07	3.19657e+07	3.18887e+07	3.18098e+07	1.8869e+08	7730.19	7783.76	7860.09		2.72523e+07	2.72464e+07	2.72092e+07	2.71477e+07	2.70715e+07	2.69941e+07	1.60258e+08	6650.25	6695.35	6759.2
3.17922e+07	3.17939e+07	3.17626e+07	3.17018e+07	3.1622e+07	3.15379e+07	1.87102e+08	7708.57	7770.31	7839.59		2.75693e+07	2.75622e+07	2.75241e+07	2.74623e+07	2.73859e+07	2.73083e+07	1.62118e+08	6718.69	6764.44	6829.13
3.18886e+07	3.18832e+07	3.18419e+07	3.17726e+07	3.16858e+07	3.15964e+07	1.87552e+08	7741.31	7785.38	7849.7		2.81397e+07	2.81316e+07	2.8093e+07	2.80307e+07	2.79539e+07	2.78757e+07	1.65475e+08	6837.43	6882.76	6947.43
3.19198e+07	3.19089e+07	3.18619e+07	3.17873e+07	3.16967e+07	3.16057e+07	1.87662e+08	7743.07	7785.44	7850.27		2.89406e+07	2.89332e+07	2.8895e+07	2.88331e+07	2.87565e+07	2.86783e+07	1.70208e+08	7011.43	7057.71	7123.84
3.19865e+07	3.19723e+07	3.19231e+07	3.18479e+07	3.17576e+07	3.16672e+07	1.8803e+08	7752.71	7796.56	7864.25		3.0085e+07	3.00802e+07	3.00441e+07	2.99838e+07	2.99071e+07	2.98276e+07	1.76987e+08	7281.16	7331.69	7402.3
3.20928e+07	3.20783e+07	3.20298e+07	3.19557e+07	3.18666e+07	3.17775e+07	1.88666e+08	7773	7819.57	7890.29		3.14875e+07	3.14762e+07	3.14325e+07	3.13638e+07	3.12803e+07	3.11957e+07	1.85159e+08	7578.74	7621.32	7685.73
3.21558e+07	3.2143e+07	3.20967e+07	3.20249e+07	3.19378e+07	3.18504e+07	1.89067e+08	7787.63	7837.76	7911.88		3.29751e+07	3.29612e+07	3.29163e+07	3.28474e+07	3.27638e+07	3.26792e+07	1.93921e+08	7879.03	7920.08	7984.07
3.23834e+07	3.23744e+07	3.23317e+07	3.22634e+07	3.21793e+07	3.20942e+07	1.90462e+08	7840.79	7895.3	7973.39		3.38547e+07	3.38427e+07	3.37993e+07	3.37317e+07	3.36494e+07	3.35663e+07	1.99135e+08	8079.32	8123.52	8191.13
3.26346e+07	3.26275e+07	3.25869e+07	3.25203e+07	3.24376e+07	3.23536e+07	1.91971e+08	7897.2	7953.48	8033.15		3.46115e+07	3.45973e+07	3.45504e+07	3.44782e+07	3.43906e+07	3.43019e+07	2.03548e+08	8252.94	8292.08	8355.27
3.30264e+07	3.30176e+07	3.29754e+07	3.29073e+07	3.28234e+07	3.27381e+07	1.9426e+08	7971.81	8025.6	8103.1		3.52922e+07	3.52753e+07	3.52267e+07	3.51536e+07	3.50658e+07	3.49772e+07	2.07542e+08	8388.32	8427.56	8491.4
3.35865e+07	3.35735e+07	3.35273e+07	3.34558e+07	3.33688e+07	3.3281e+07	1.97511e+08	8073.78	8122.06	8194.67		3.54613e+07	3.54453e+07	3.53976e+07	3.53256e+07	3.52388e+07	3.51509e+07	2.08554e+08	8428.89	8469.57	8534.94
3.41052e+07	3.40891e+07	3.40403e+07	3.39663e+07	3.38772e+07	3.37875e+07	2.00534e+08	8170.16	8213.92	8282.46		3.49152e+07	3.49018e+07	3.48557e+07	3.47848e+07	3.46985e+07	3.46109e+07	2.05355e+08	8336.31	8380.83	8449.54
3.46634e+07	3.46453e+07	3.4594e+07	3.45175e+07	3.4426e+07	3.43339e+07	2.03794e+08	8274.37	8312.07	8374.49		3.43371e+07	3.43273e+07	3.4284e+07	3.42149e+07	3.41297e+07	3.40418e+07	2.01979e+08	8243.46	8293.23	8366.63
3.51834e+07	3.51672e+07	3.51176e+07	3.50422e+07	3.49515e+07	3.48598e+07	2.06884e+08	8371.92	8407.8	8467.73		3.37843e+07	3.37735e+07	3.37275e+07	3.36543e+07	3.35645e+07	3.34734e+07	1.98676e+08	8151.59	8200.2	8271.6
3.55435e+07	3.55281e+07	3.54799e+07	3.54064e+07	3.53172e+07	3.52266e+07	2.09028e+08	8437.32	8472.48	8531.66		3.32947e+07	3.32849e+07	3.32396e+07	3.3167e+07	3.30775e+07	3.29867e+07	1.95797e+08	8056.59	8106.67	8179.16
3.56753e+07	3.56607e+07	3.56136e+07	3.55413e+07	3.54534e+07	3.53638e+07	2.09822e+08	8460.58	8495.58	8554.62		3.23022e+07	3.22954e+07	3.22528e+07	3.2182e+07	3.20936e+07	3.2003e+07	1.89972e+08	7857.54	7909.91	7983.78
3.58101e+07	3.57958e+07	3.5749e+07	3.56772e+07	3.55899e+07	3.5501e+07	2.10623e+08	8484.36	8518.98	8577.77		3.13024e+07	3.12986e+07	3.12595e+07	3.11931e+07	3.11085e+07	3.10211e+07	1.84124e+08	7643.44	7701.22	7779.45
3.59111e+07	3.58981e+07	3.58526e+07	3.5782e+07	3.5696e+07	3.56083e+07	2.11238e+08	8499.79	8536.09	8594.8		3.09028e+07	3.08962e+07	3.08547e+07	3.07865e+07	3.07021e+07	3.0616e+07	1.81738e+08	7533.85	7585.88	7658.92
3.60051e+07	3.59936e+07	3.59499e+07	3.58807e+07	3.5796e+07	3.57096e+07	2.11815e+08	8510.48	8551.8	8610.41		3.08178e+07	3.08139e+07	3.07767e+07	3.07134e+07	3.06336e+07	3.05503e+07	1.81293e+08	7493.9	7548.52	7624.07
3.60575e+07	3.60452e+07	3.60029e+07	3.5936e+07	3.58529e+07	3.57677e+07	2.12137e+08	8513.83	8556.17	8618.41		3.07979e+07	3.0791e+07	3.07512e+07	3.06859e+07	3.06047e+07	3.0522e+07	1.81143e+08	7469.47	7520.32	7592.21
3.5935e+07	3.59217e+07	3.58785e+07	3.58124e+07	3.57324e+07	3.56506e+07	2.11418e+08	8482.57	8524.12	8590.83		3.09252e+07	3.09158e+07	3.08739e+07	3.0807e+07	3.07247e+07	3.0641e+07	1.81866e+08	7480.29	7527.73	7596.42
3.58063e+07	3.57925e+07	3.57489e+07	3.56823e+07	3.56019e+07	3.55208e+07	2.10653e+08	8453.54	8494.75	8561.1		3.11713e+07	3.11608e+07	3.11181e+07	3.10505e+07	3.09677e+07	3.08837e+07	1.83306e+08	7525.46	7571.39	7638.8
3.56068e+07	3.55934e+07	3.55499e+07	3.54834e+07	3.5403e+07	3.53218e+07	2.09478e+08	8416.36	8458.34	8525.31		3.1997e+07	3.19867e+07	3.19443e+07	3.18772e+07	3.17946e+07	3.17108e+07	1.88184e+08	7700.18	7746.44	7814.73
3.5407e+07	3.53943e+07	3.53513e+07	3.5285e+07	3.52047e+07	3.51237e+07	2.08305e+08	8380.77	8423.83	8491.7		3.30768e+07	3.30657e+07	3.30229e+07	3.29558e+07	3.2874e+07	3.27909e+07	1.94554e+08	7922.61	7967.96	8036.13
3.52378e+07	3.52257e+07	3.51831e+07	3.51172e+07	3.50371e+07	3.49563e+07	2.07313e+08	8351.09	8395.15	8463.9		3.37864e+07	3.37768e+07	3.37351e+07	3.36674e+07	3.3583e+07	3.34967e+07	1.98743e+08	8085.71	8133.26	8199.65
3.4966e+07	3.49551e+07	3.49133e+07	3.48479e+07	3.47682e+07	3.46878e+07	2.0572e+08	8302.99	8348.64	8418.74		3.42919e+07	3.42775e+07	3.42299e+07	3.41569e+07	3.40689e+07	3.39799e+07	2.01654e+08	8196.74	8238.4	8303.82
3.47322e+07	3.47219e+07	3.46807e+07	3.46157e+07	3.45363e+07	3.44561e+07	2.04348e+08	8259.87	8306.64	8377.66		3.45518e+07	3.45382e+07	3.44919e+07	3.44202e+07	3.43331e+07	3.42447e+07	2.03204e+08	8260.91	8305.24	8373.48
3.46332e+07	3.46242e+07	3.45839e+07	3.45197e+07	3.44406e+07	3.43585e+07	2.03774e+08	8247.14	8295.34	8367.65		3.45578e+07	3.45456e+07	3.45006e+07	3.44302e+07	3.43441e+07	3.42566e+07	2.03258e+08	8272.2	8318.62	8388.91
3.45976e+07	3.45899e+07	3.45507e+07	3.44854e+07	3.44025e+07	3.43171e+07	2.03561e+08	8248.92	8298.67	8365.7		3.4214e+07	3.42034e+07	3.41595e+07	3.40899e+07	3.40043e+07	3.39171e+07	2.01244e+08	8212.13	8260.76	8332.95
3.45189e+07	3.45122e+07	3.4471e+07	3.44027e+07	3.43176e+07	3.42304e+07	2.03079e+08	8240.97	8288.77	8351.06		3.35748e+07	3.35673e+07	3.35256e+07	3.34564e+07	3.33697e+07	3.32805e+07	1.97493e+08	8100.13	8152.98	8224.97
3.46826e+07	3.4674e+07	3.46309e+07	3.45612e+07	3.44751e+07	3.43869e+07	2.04021e+08	8275.28	8318.23	8379.96		3.26675e+07	3.26594e+07	3.26154e+07	3.25438e+07	3.2455e+07	3.23642e+07	1.92113e+08	7932.3	7984	8057.56
3.48452e+07	3.48349e+07	3.47905e+07	3.47199e+07	3.46331e+07	3.45443e+07	2.04962e+08	8308.54	8347.5	8408.73		3.16949e+07	3.16879e+07	3.16446e+07	3.15732e+07	3.14842e+07	3.1393e+07	1.86381e+08	7744.17	7798.8	7874.51
3.50171e+07	3.50043e+07	3.4958e+07	3.48857e+07	3.47973e+07	3.47071e+07	2.05947e+08	8341.15	8378.29	8438.81		3.07414e+07	3.07361e+07	3.06938e+07	3.06228e+07	3.05338e+07	3.04426e+07	1.80766e+08	7557.41	7614.6	7692.14
3.52894e+07	3.52723e+07	3.52221e+07	3.51462e+07	3.50554e+07	3.49638e+07	2.07501e+08	8391.4	8426.89	8486.74		2.98803e+07	2.98763e+07	2.98348e+07	2.97639e+07	2.96747e+07	2.95834e+07	1.75694e+08	7388.75	7448.19	7527.35
3.55283e+07	3.55087e+07	3.54572e+07	3.53813e+07	3.52909e+07	3.51999e+07	2.08895e+08	8435.64	8471.19	8532.05		2.91361e+07	2.91334e+07	2.90924e+07	2.90216e+07	2.8932e+07	2.88398e+07	1.71309e+08	7245.14	7306.56	7387.22
3.56635e+07	3.56443e+07	3.55935e+07	3.55188e+07	3.54296e+07	3.53397e+07	2.09705e+08	8462.26	8499.08	8561.51		2.85477e+07	2.85457e+07	2.85054e+07	2.84351e+07	2.83458e+07	2.8254e+07	1.67845e+08	7130.97	7193.7	7275.37
3.57642e+07	3.57452e+07	3.56952e+07	3.56214e+07	3.55333e+07	3.54444e+07	2.10309e+08	8482.69	8520.45	8583.88		2.81398e+07	2.8138e+07	2.80978e+07	2.80274e+07	2.79381e+07	2.78462e+07	1.65438e+08	7050.07	7113.43	7195.56
3.59106e+07	3.58918e+07	3.58419e+07	3.57687e+07	3.56813e+07	3.55932e+07	2.11179e+08	8511	8549.02	8612.75		3.61823e+07	3.61569e+07	3.61095e+07	3.60456e+07	3.59724e+07	3.58998e+07	2.12831e+08	8312.7	8329.09	8371.5
3.61763e+07	3.61558e+07	3.61045e+07	3.60297e+07	3.59409e+07	3.58515e+07	2.12724e+08	8554.34	8588.55	8648.62		3.57287e+07	3.5703e+07	3.56543e+07	3.55884e+07	3.55127e+07	3.54375e+07	2.10133e+08	8236.21	8254.58	8298.87
3.65436e+07	3.65232e+07	3.64718e+07	3.6397e+07	3.63083e+07	3.62189e+07	2.14892e+08	8616.24	8647.58	8704.51		2.85445e+07	2.8538e+07	2.84955e+07	2.84253e+07	2.83382e+07	2.825e+07	1.67803e+08	7084.46	7141.03	7217.53
3.68343e+07	3.68149e+07	3.67648e+07	3.66912e+07	3.66036e+07	3.65153e+07	2.16625e+08	8663.91	8694.03	8749.58		2.79292e+07	2.79265e+07	2.78856e+07	2.78147e+07	2.77247e+07	2.7632e+07	1.64184e+08	6998.6	7060.73	7141.84
3.68033e+07	3.67825e+07	3.67312e+07	3.66568e+07	3.65688e+07	3.64801e+07	2.16427e+08	8660.45	8690.7	8746.67		2.81141e+07	2.81111e+07	2.80699e+07	2.79992e+07	2.79094e+07	2.78168e+07	1.65274e+08	7037.59	7099.53	7180.57
3.68936e+07	3.68718e+07	3.682e+07	3.67456e+07	3.66578e+07	3.65695e+07	2.16954e+08	8676.73	8706.77	8762.79		2.8208e+07	2.8205e+07	2.81638e+07	2.80929e+07	2.80033e+07	2.79112e+07	1.65828e+08	7058.06	7120.01	7201.1
3.70804e+07	3.70588e+07	3.70072e+07	3.69333e+07	3.6846e+07	3.67582e+07	2.18061e+08	8706.85	8735.89	8790.88		2.82452e+07	2.82422e+07	2.8201e+07	2.813e+07	2.80405e+07	2.79485e+07	1.66048e+08	7066.42	7128.41	7209.55
3.72658e+07	3.72467e+07	3.7198e+07	3.71267e+07	3.70416e+07	3.69555e+07	2.19192e+08	8731.43	8759.63	8813.53		2.82889e+07	2.82861e+07	2.82449e+07	2.8174e+07	2.80844e+07	2.79923e+07	1.66307e+08	7077.39	7139.62	7220.97
3.74266e+07	3.74094e+07	3.73645e+07	3.72973e+07	3.72158e+07	3.71331e+07	2.20188e+08	8741.23	8774.61	8830.08		2.82249e+07	2.82223e+07	2.81814e+07	2.81106e+07	2.8021e+07	2.7929e+07	1.65932e+08	7065.61	7128.2	7209.8
3.74017e+07	3.73834e+07	3.73377e+07	3.72711e+07	3.7192e+07	3.71116e+07	2.20042e+08	8727.65	8759.9	8818.58		2.80107e+07	2.80086e+07	2.79681e+07	2.78975e+07	2.78081e+07	2.77161e+07	1.64673e+08	7022.42	7085.52	7167.45
3.73219e+07	3.73036e+07	3.72577e+07	3.71908e+07	3.71115e+07	3.70316e+07	2.19569e+08	8712.39	8744.83	8803.65		3.51911e+07	3.51652e+07	3.51152e+07	3.50471e+07	3.49689e+07	3.48912e+07	2.0694e+08	8147.63	8167.77	8213.55
3.7253e+07	3.72348e+07	3.7189e+07	3.71221e+07	3.70426e+07	3.69626e+07	2.19163e+08	8701.19	8734.07	8793.28		3.76231e+07	3.75875e+07	3.7535e+07	3.74706e+07	3.74004e+07	3.73323e+07	2.21273e+08	8477.74	8476.58	8503.01
3.71836e+07	3.7166e+07	3.71206e+07	3.70538e+07	3.69744e+07	3.68939e+07	2.18758e+08	8692.72	8726.46	8786.45		2.81414e+07	2.8141e+07	2.81035e+07	2.80369e+07	2.79521e+07	2.7865e+07	1.6549e+08	7014.67	7076.31	7156.14
3.71008e+07	3.7084e+07	3.7039e+07	3.69726e+07	3.68929e+07	3.68109e+07	2.18274e+08	8683.02	8717.85	8778.82		2.75492e+07	2.75484e+07	2.75089e+07	2.74391e+07	2.73502e+07	2.72586e+07	1.61963e+08	6929.01	6993.45	7076.2
3.70108e+07	3.69947e+07	3.69502e+07	3.68839e+07	3.6803e+07	3.672e+07	2.17745e+08	8671.57	8707.47	8768.34		2.78329e+07	2.78318e+07	2.7792e+07	2.7722e+07	2.76329e+07	2.75412e+07	1.63633e+08	6987.03	7051.02	7133.5
3.69737e+07	3.69588e+07	3.69137e+07	3.68447e+07	3.67613e+07	3.66766e+07	2.17515e+08	8674.54	8710.44	8765.64		2.80364e+07	2.80349e+07	2.79949e+07	2.79248e+07	2.78356e+07	2.77438e+07	1.64831e+08	7028.57	7092.2	7174.47
3.69351e+07	3.69179e+07	3.68704e+07	3.67995e+07	3.67144e+07	3.6628e+07	2.17255e+08	8676.69	8706.63	8761.91		2.8171e+07	2.81696e+07	2.81296e+07	2.80596e+07	2.79705e+07	2.78788e+07	1.65627e+08	7054.88	7118.33	7200.45
3.68763e+07	3.68578e+07	3.68089e+07	3.67365e+07	3.66498e+07	3.65621e+07	2.16888e+08	8669.21	8699.28	8754.67		2.825e+07	2.82486e+07	2.82089e+07	2.8139e+07	2.80501e+07	2.79584e+07	1.66095e+08	7068.16	7131.44	7213.36
3.68103e+07	3.67903e+07	3.67397e+07	3.66657e+07	3.65778e+07	3.64893e+07	2.16476e+08	8660.62	8690.81	8746.52		2.8307e+07	2.83056e+07	2.82658e+07	2.81958e+07	2.81067e+07	2.8015e+07	1.6643e+08	7076.45	7139.5	7221.17
3.66804e+07	3.66588e+07	3.6607e+07	3.65324e+07	3.64441e+07	3.63553e+07	2.15694e+08	8641.35	8672.62	8729.87		2.84302e+07	2.84286e+07	2.83886e+07	2.83187e+07	2.82298e+07	2.81385e+07	1.67157e+08	7098.52	7161.18	7242.5
3.64821e+07	3.64614e+07	3.64102e+07	3.63362e+07	3.62488e+07	3.6161e+07	2.14535e+08	8611.49	8646.09	8706.77		2.91577e+07	2.91549e+07	2.91142e+07	2.90439e+07	2.8955e+07	2.88638e+07	1.7144e+08	7243.62	7304.65	7384.86
3.62662e+07	3.62482e+07	3.61992e+07	3.61269e+07	3.60408e+07	3.59545e+07	2.13292e+08	8581.52	8620.49	8685.24		2.98393e+07	2.98354e+07	2.97941e+07	2.97236e+07	2.96348e+07	2.95436e+07	1.75455e+08	7378.82	7438.23	7517.32
3.61153e+07	3.60993e+07	3.6052e+07	3.59809e+07	3.58958e+07	3.58102e+07	2.12424e+08	8561.11	8602.82	8670.08		3.0475e+07	3.04702e+07	3.04283e+07	3.03575e+07	3.02687e+07	3.01775e+07	1.79199e+08	7504.18	7562	7639.95
3.59904e+07	3.59753e+07	3.59287e+07	3.58582e+07	3.57734e+07	3.56881e+07	2.11697e+08	8540.94	8583.9	8652.27		3.11426e+07	3.1137e+07	3.10948e+07	3.10242e+07	3.09357e+07	3.0845e+07	1.83136e+08	7629.89	7685.56	7761.82
3.58527e+07	3.58378e+07	3.57914e+07	3.57209e+07	3.56361e+07	3.55508e+07	2.10886e+08	8514.92	8558.28	8626.97		3.16787e+07	3.16749e+07	3.16347e+07	3.1566e+07	3.14794e+07	3.13905e+07	1.86328e+08	7726.09	7782.34	7856.7
3.57414e+07	3.5725e+07	3.56773e+07	3.56057e+07	3.552e+07	3.54336e+07	2.1021e+08	8487.02	8528.58	8595.58		3.20836e+07	3.20759e+07	3.20337e+07	3.19648e+07	3.18792e+07	3.17922e+07	1.88694e+08	7786.06	7838.84	7913.52
3.57201e+07	3.57015e+07	3.56518e+07	3.55784e+07	3.54906e+07	3.5402e+07	2.10054e+08	8475.57	8514.04	8578.13		3.19768e+07	3.19675e+07	3.19239e+07	3.18539e+07	3.17678e+07	3.16804e+07	1.88046e+08	7750.13	7799.72	7871.16
3.56672e+07	3.56478e+07	3.55967e+07	3.55216e+07	3.54321e+07	3.53419e+07	2.09723e+08	8462.31	8498.61	8560.49		3.17215e+07	3.17161e+07	3.16777e+07	3.16138e+07	3.15327e+07	3.14483e+07	1.86609e+08	7678.02	7730.87	7804.6
3.55601e+07	3.55411e+07	3.54905e+07	3.54158e+07	3.53266e+07	3.52367e+07	2.09097e+08	8443.45	8480.82	8543.75		3.141e+07	3.14021e+07	3.13616e+07	3.12957e+07	3.12141e+07	3.1131e+07	1.84745e+08	7592.54	7642	7712.99
3.54491e+07	3.5431e+07	3.53815e+07	3.53077e+07	3.52194e+07	3.51303e+07	2.08455e+08	8425.02	8464.23	8528.92		3.09874e+07	3.09786e+07	3.09373e+07	3.08709e+07	3.07888e+07	3.07053e+07	1.8224e+08	7497.84	7546.27	7615.95
3.53804e+07	3.53642e+07	3.53164e+07	3.52446e+07	3.51581e+07	3.50706e+07	2.08077e+08	8417.42	8459.43	8526.72		3.06956e+07	3.06863e+07	3.06445e+07	3.05777e+07	3.04954e+07	3.04119e+07	1.80512e+08	7432.28	7479.79	7548.38
3.55322e+07	3.55176e+07	3.54714e+07	3.5401e+07	3.53162e+07	3.52306e+07	2.08996e+08	8453.2	8497.21	8566.4		3.07756e+07	3.07659e+07	3.07236e+07	3.06559e+07	3.05731e+07	3.04891e+07	1.80976e+08	7438.19	7482.71	7548.49
3.56832e+07	3.567e+07	3.56249e+07	3.55555e+07	3.54715e+07	3.53868e+07	2.09904e+08	8489.16	8534.68	8605.3		3.11468e+07	3.11364e+07	3.10938e+07	3.10263e+07	3.09436e+07	3.08596e+07	1.83163e+08	7521.18	7567.32	7634.91
3.58246e+07	3.58126e+07	3.57685e+07	3.56999e+07	3.56166e+07	3.55324e+07	2.10753e+08	8523.6	8570.37	8642.2		3.1501e+07	3.14923e+07	3.14511e+07	3.13848e+07	3.13028e+07	3.12194e+07	1.85273e+08	7606.55	7654.99	7725.05
3.57837e+07	3.57728e+07	3.57271e+07	3.56549e+07	3.55662e+07	3.54758e+07	2.10483e+08	8534.86	8577.95	8642.79		3.18884e+07	3.18804e+07	3.18401e+07	3.17745e+07	3.16932e+07	3.16103e+07	1.8757e+08	7693.54	7742.87	7814.06
3.57199e+07	3.57041e+07	3.56538e+07	3.55769e+07	3.54844e+07	3.5391e+07	2.1004e+08	8522.8	8562.61	8626.89		3.22249e+07	3.22168e+07	3.21764e+07	3.21109e+07	3.20299e+07	3.19473e+07	1.89557e+08	7764.79	7814.07	7885.44
3.56944e+07	3.56768e+07	3.56253e+07	3.55481e+07	3.54555e+07	3.53622e+07	2.09875e+08	8515.78	8556.05	8621.43		3.20772e+07	3.207e+07	3.20303e+07	3.19654e+07	3.18848e+07	3.18025e+07	1.88695e+08	7740.69	7791.25	7863.75
3.56905e+07	3.56767e+07	3.56284e+07	3.55535e+07	3.54622e+07	3.53695e+07	2.09893e+08	8518.96	8559.41	8623.76		3.19409e+07	3.19344e+07	3.18952e+07	3.18307e+07	3.17504e+07	3.1668e+07	1.87897e+08	7716.62	7768.05	7841.29
3.57342e+07	3.57229e+07	3.56794e+07	3.56112e+07	3.55281e+07	3.5444e+07	2.10227e+08	8509.08	8556.71	8629.3		3.1833e+07	3.18268e+07	3.17878e+07	3.17236e+07	3.16434e+07	3.15606e+07	1.87263e+08	7696.11	7747.98	7821.58
3.59299e+07	3.59133e+07	3.58654e+07	3.57938e+07	3.57081e+07	3.5622e+07	2.11321e+08	8522.55	8563.64	8630.26		3.184e+07	3.18347e+07	3.17964e+07	3.17314e+07	3.1649e+07	3.1564e+07	1.87303e+08	7704.65	7757.71	7828.47
3.60509e+07	3.60312e+07	3.59806e+07	3.59066e+07	3.58186e+07	3.573e+07	2.11996e+08	8534.29	8570.58	8632.71		3.21179e+07	3.21123e+07	3.20717e+07	3.20042e+07	3.19202e+07	3.18344e+07	1.88921e+08	7765.53	7815.86	7883.78
3.61379e+07	3.61176e+07	3.6066e+07	3.59906e+07	3.59011e+07	3.5811e+07	2.12493e+08	8545.9	8579.15	8638.01		3.25681e+07	3.25592e+07	3.25162e+07	3.24467e+07	3.23611e+07	3.22738e+07	1.91542e+08	7859.5	7904.92	7972.68
3.62024e+07	3.61845e+07	3.61348e+07	3.60606e+07	3.59715e+07	3.58817e+07	2.12898e+08	8555.24	8587.9	8645.38		3.29485e+07	3.29373e+07	3.28921e+07	3.28207e+07	3.27334e+07	3.26451e+07	1.93758e+08	7937.93	7983.75	8052.23
3.62506e+07	3.62357e+07	3.61891e+07	3.6118e+07	3.60319e+07	3.59442e+07	2.13227e+08	8561.15	8594.18	8651.82		3.32776e+07	3.32654e+07	3.32197e+07	3.31481e+07	3.30607e+07	3.29722e+07	1.95692e+08	8007.91	8054.35	8123.69
3.63163e+07	3.63032e+07	3.62604e+07	3.61931e+07	3.611e+07	3.60251e+07	2.13658e+08	8559.31	8600.22	8660.98		3.35573e+07	3.35455e+07	3.35001e+07	3.34288e+07	3.33417e+07	3.32532e+07	1.97347e+08	8068.55	8115.65	8185.85
3.64117e+07	3.6397e+07	3.6353e+07	3.62866e+07	3.62066e+07	3.61248e+07	2.1422e+08	8566.26	8605.21	8669.71		3.36832e+07	3.36714e+07	3.36261e+07	3.35549e+07	3.34678e+07	3.33794e+07	1.98091e+08	8094.41	8141.46	8211.71
3.65254e+07	3.65103e+07	3.64662e+07	3.63997e+07	3.63198e+07	3.62378e+07	2.14889e+08	8586.05	8624.38	8688.37		3.38061e+07	3.37942e+07	3.37489e+07	3.36777e+07	3.35907e+07	3.35024e+07	1.98817e+08	8119.59	8166.59	8236.88
3.65792e+07	3.65657e+07	3.65213e+07	3.64522e+07	3.63683e+07	3.62828e+07	2.15194e+08	8608.94	8647.45	8704.18		3.39344e+07	3.39226e+07	3.38775e+07	3.38065e+07	3.37197e+07	3.36316e+07	1.99576e+08	8146.72	8193.84	8264.35
3.65912e+07	3.65738e+07	3.65254e+07	3.64532e+07	3.63662e+07	3.6278e+07	2.15212e+08	8620.83	8652.22	8708.61		3.41693e+07	3.41578e+07	3.4113e+07	3.40423e+07	3.39559e+07	3.3868e+07	2.00967e+08	8195.69	8242.87	8313.62
3.66337e+07	3.66142e+07	3.65636e+07	3.64892e+07	3.64008e+07	3.63118e+07	2.15434e+08	8630.7	8661.62	8717.92		3.45195e+07	3.45073e+07	3.44622e+07	3.43917e+07	3.43054e+07	3.42178e+07	2.0303e+08	8263.74	8310.04	8380.18
3.67664e+07	3.67449e+07	3.66933e+07	3.66188e+07	3.65306e+07	3.64418e+07	2.16203e+08	8655.12	8685.69	8742.15		3.47152e+07	3.47035e+07	3.46588e+07	3.45887e+07	3.45032e+07	3.44164e+07	2.04193e+08	8307.96	8355.04	8426.09
3.68073e+07	3.67853e+07	3.67333e+07	3.66588e+07	3.6571e+07	3.64829e+07	2.16442e+08	8664.4	8695.71	8753.21		3.46452e+07	3.46354e+07	3.45918e+07	3.45211e+07	3.44337e+07	3.43447e+07	2.03786e+08	8307.35	8357.11	8425.91
3.66659e+07	3.66447e+07	3.65932e+07	3.65191e+07	3.64317e+07	3.63441e+07	2.15616e+08	8643.36	8676.98	8736.79		3.45664e+07	3.45552e+07	3.45094e+07	3.44369e+07	3.43479e+07	3.42574e+07	2.03295e+08	8298.67	8344.35	8413.36
3.64867e+07	3.6468e+07	3.64187e+07	3.63461e+07	3.62599e+07	3.61735e+07	2.14587e+08	8620.57	8658.43	8722.23		3.44539e+07	3.44426e+07	3.43967e+07	3.43239e+07	3.42347e+07	3.41439e+07	2.02629e+08	8277.73	8323.85	8393.23
3.63603e+07	3.6345e+07	3.62985e+07	3.62281e+07	3.61434e+07	3.60583e+07	2.1388e+08	8612.33	8654.67	8722.6		3.43052e+07	3.42946e+07	3.42493e+07	3.4177e+07	3.40882e+07	3.39979e+07	2.0176e+08	8248.79	8295.32	8364.96
3.62804e+07	3.62683e+07	3.62243e+07	3.61556e+07	3.60703e+07	3.59829e+07	2.13435e+08	8613.84	8659.83	8729.26		3.39927e+07	3.3983e+07	3.39385e+07	3.38668e+07	3.37785e+07	3.36885e+07	1.99926e+08	8188.36	8235.82	8306.12
3.60903e+07	3.60794e+07	3.60361e+07	3.59663e+07	3.58798e+07	3.57914e+07	2.12316e+08	8582.81	8630.37	8697.07		3.33665e+07	3.3358e+07	3.33143e+07	3.32432e+07	3.31551e+07	3.30648e+07	1.96241e+08	8066.8	8116.15	8187.82
3.58613e+07	3.58504e+07	3.58048e+07	3.57326e+07	3.5644e+07	3.55538e+07	2.10942e+08	8548.4	8591.74	8656.44		3.2677e+07	3.26705e+07	3.26282e+07	3.25579e+07	3.24702e+07	3.23801e+07	1.9219e+08	7930.1	7981.25	8054.14
3.55918e+07	3.55778e+07	3.55292e+07	3.54538e+07	3.53621e+07	3.5269e+07	2.09306e+08	8500.7	8541.27	8605.73		3.20201e+07	3.20153e+07	3.19754e+07	3.19079e+07	3.1822e+07	3.17336e+07	1.88345e+08	7790.01	7846.5	7922.55
3.53905e+07	3.53736e+07	3.53223e+07	3.52448e+07	3.51518e+07	3.50582e+07	2.08084e+08	8460.24	8501.07	8566.74		3.12938e+07	3.12893e+07	3.12497e+07	3.11829e+07	3.10991e+07	3.10132e+07	1.84069e+08	7637.64	7694.56	7772.75
3.54385e+07	3.54214e+07	3.537e+07	3.52926e+07	3.51997e+07	3.51061e+07	2.08366e+08	8468.9	8509.7	8575.41		3.05169e+07	3.05137e+07	3.04754e+07	3.04097e+07	3.03269e+07	3.02423e+07	1.79502e+08	7478.25	7536.57	7615.58
3.54831e+07	3.54659e+07	3.54145e+07	3.53371e+07	3.52442e+07	3.51507e+07	2.08629e+08	8477.06	8517.78	8583.47		2.97717e+07	2.97705e+07	2.9734e+07	2.967e+07	2.95883e+07	2.95035e+07	1.75128e+08	7328.1	7388.63	7469.29
3.54491e+07	3.54317e+07	3.53803e+07	3.53031e+07	3.52104e+07	3.51171e+07	2.08428e+08	8470.05	8511.25	8577.54		2.98909e+07	2.98883e+07	2.98507e+07	2.97858e+07	2.97039e+07	2.96202e+07	1.75818e+08	7345.46	7404.09	7482.96
3.53631e+07	3.53466e+07	3.5296e+07	3.52195e+07	3.51273e+07	3.50342e+07	2.07932e+08	8454.95	8497.57	8564.93		3.00941e+07	3.00905e+07	3.00521e+07	2.99864e+07	2.9904e+07	2.98197e+07	1.77006e+08	7383.83	7441.25	7519.06
3.53658e+07	3.53495e+07	3.52992e+07	3.52228e+07	3.51306e+07	3.50374e+07	2.0795e+08	8457.41	8500.32	8567.92		3.04065e+07	3.04023e+07	3.03631e+07	3.02968e+07	3.02137e+07	3.0129e+07	1.7884e+08	7447.24	7503.87	7581.11
3.53449e+07	3.53287e+07	3.52785e+07	3.52022e+07	3.51101e+07	3.50169e+07	2.07828e+08	8454.39	8497.48	8565.23		3.09197e+07	3.09142e+07	3.08739e+07	3.08066e+07	3.07225e+07	3.06369e+07	1.81852e+08	7550.61	7605.86	7682.11
3.51924e+07	3.51766e+07	3.51266e+07	3.50503e+07	3.4958e+07	3.48647e+07	2.0693e+08	8426.82	8470.51	8538.74		3.16483e+07	3.16425e+07	3.16017e+07	3.15339e+07	3.14493e+07	3.1363e+07	1.86146e+08	7704.85	7760	7836.71
3.49666e+07	3.49515e+07	3.49019e+07	3.48257e+07	3.47335e+07	3.464e+07	2.05603e+08	8386.62	8431.29	8500.31		3.22537e+07	3.22482e+07	3.22079e+07	3.21404e+07	3.20548e+07	3.19666e+07	1.89719e+08	7835.53	7891.21	7968.01
3.4934e+07	3.49192e+07	3.48699e+07	3.4794e+07	3.47019e+07	3.46085e+07	2.05414e+08	8381.95	8426.94	8496.21		3.26775e+07	3.26705e+07	3.2628e+07	3.25575e+07	3.24694e+07	3.23791e+07	1.92188e+08	7930.78	7982	8054.98
3.48283e+07	3.48134e+07	3.4764e+07	3.46879e+07	3.45955e+07	3.4502e+07	2.04788e+08	8361.06	8406.23	8475.64		3.30347e+07	3.30258e+07	3.29813e+07	3.29091e+07	3.28202e+07	3.27294e+07	1.94272e+08	8004.7	8055.39	8128.23
3.47132e+07	3.46981e+07	3.46483e+07	3.45719e+07	3.44793e+07	3.43857e+07	2.04105e+08	8336.8	8382	8451.4		3.3489e+07	3.34788e+07	3.34332e+07	3.33603e+07	3.32707e+07	3.31797e+07	1.96939e+08	8094.52	8144.04	8216.13
3.46004e+07	3.45848e+07	3.45348e+07	3.44582e+07	3.43658e+07	3.42725e+07	2.03436e+08	8310.96	8355.88	8424.99		3.40159e+07	3.40048e+07	3.39587e+07	3.38854e+07	3.37956e+07	3.37045e+07	2.00041e+08	8195.58	8243.36	8314.11
3.49191e+07	3.4911e+07	3.48701e+07	3.48041e+07	3.47223e+07	3.46371e+07	2.0545e+08	8360.51	8412.61	8489.02		3.44795e+07	3.44675e+07	3.44209e+07	3.43474e+07	3.42575e+07	3.41663e+07	2.0277e+08	8283.82	8330.04	8399.59
3.52381e+07	3.52205e+07	3.51711e+07	3.50973e+07	3.50088e+07	3.49196e+07	2.07213e+08	8385.8	8425.86	8491.27		3.4802e+07	3.47887e+07	3.47408e+07	3.46665e+07	3.45761e+07	3.44846e+07	2.04658e+08	8346.62	8392.04	8461.13
3.55846e+07	3.55681e+07	3.5519e+07	3.54444e+07	3.53545e+07	3.52636e+07	2.09257e+08	8445.03	8479.84	8538.86		3.51021e+07	3.5088e+07	3.50397e+07	3.49652e+07	3.48748e+07	3.47832e+07	2.06423e+08	8402.92	8447.29	8515.6
3.57299e+07	3.5714e+07	3.56657e+07	3.55922e+07	3.55032e+07	3.54129e+07	2.10126e+08	8470.86	8505.4	8564.13		3.5411e+07	3.53968e+07	3.53486e+07	3.52743e+07	3.51841e+07	3.50929e+07	2.08247e+08	8458.48	8501.41	8568.46
3.58177e+07	3.58013e+07	3.57526e+07	3.56787e+07	3.55895e+07	3.54992e+07	2.10639e+08	8486.73	8520.89	8579.38		3.49257e+07	3.49128e+07	3.48655e+07	3.47916e+07	3.47016e+07	3.46104e+07	2.05395e+08	8367.99	8412.67	8481.04
3.59223e+07	3.59056e+07	3.58569e+07	3.57831e+07	3.56941e+07	3.5604e+07	2.11256e+08	8505.32	8539.13	8597.36		3.40266e+07	3.4015e+07	3.39684e+07	3.38948e+07	3.38048e+07	3.37134e+07	2.00098e+08	8199.09	8247.07	8318.08
3.60817e+07	3.60648e+07	3.60161e+07	3.59426e+07	3.5854e+07	3.57642e+07	2.12198e+08	8533.42	8566.69	8624.51		3.3042e+07	3.30324e+07	3.29871e+07	3.29142e+07	3.28244e+07	3.27331e+07	1.94304e+08	8009.58	8060.62	8133.84
3.61794e+07	3.61612e+07	3.61113e+07	3.60367e+07	3.59475e+07	3.58575e+07	2.12759e+08	8551.4	8584.1	8641.67		3.21004e+07	3.20934e+07	3.20504e+07	3.19793e+07	3.18906e+07	3.17999e+07	1.88777e+08	7819.57	7872.75	7947.33
3.61473e+07	3.6127e+07	3.60754e+07	3.6e+07	3.59105e+07	3.58204e+07	2.12549e+08	8547.57	8580.79	8639.62		3.10222e+07	3.10177e+07	3.09767e+07	3.09071e+07	3.08196e+07	3.07299e+07	1.82442e+08	7599.49	7654.89	7730.77
3.6001e+07	3.5982e+07	3.5932e+07	3.58587e+07	3.57714e+07	3.56835e+07	2.11711e+08	8527.46	8565.12	8628.54		2.98699e+07	2.98679e+07	2.98292e+07	2.9762e+07	2.96767e+07	2.95891e+07	1.75676e+08	7361.64	7419.25	7496.39
3.59387e+07	3.59227e+07	3.58753e+07	3.58041e+07	3.57188e+07	3.56331e+07	2.11381e+08	8526.8	8568.68	8636.03		2.89548e+07	2.8956e+07	2.89215e+07	2.8858e+07	2.87763e+07	2.86916e+07	1.70328e+08	7162.79	7225.93	7303.62
3.60072e+07	3.59932e+07	3.59476e+07	3.58777e+07	3.57935e+07	3.57087e+07	2.11809e+08	8549.4	8593.63	8663.17		2.8164e+07	2.81651e+07	2.8131e+07	2.80693e+07	2.79901e+07	2.79086e+07	1.65675e+08	6986.89	7049.06	7130.27
3.61312e+07	3.61185e+07	3.6074e+07	3.60052e+07	3.59216e+07	3.58371e+07	2.12556e+08	8581.1	8626.72	8697.61		2.74551e+07	2.74572e+07	2.74242e+07	2.73638e+07	2.72859e+07	2.72056e+07	1.61508e+08	6836.15	6899.27	6980.99
3.62344e+07	3.62232e+07	3.61789e+07	3.61078e+07	3.60206e+07	3.59316e+07	2.13155e+08	8610.71	8657.23	8721.28		2.691e+07	2.69149e+07	2.68838e+07	2.68238e+07	2.67455e+07	2.66644e+07	1.58312e+08	6729.5	6795.42	6874.8
3.62913e+07	3.6275e+07	3.62251e+07	3.61492e+07	3.60577e+07	3.59652e+07	2.13417e+08	8626.1	8664.39	8727.37		2.65566e+07	2.65608e+07	2.65286e+07	2.64677e+07	2.63884e+07	2.63064e+07	1.56212e+08	6664.25	6727.57	6807.71
3.63861e+07	3.63675e+07	3.63161e+07	3.62396e+07	3.61482e+07	3.6056e+07	2.13959e+08	8640.32	8678.64	8742.52		2.66349e+07	2.66378e+07	2.6604e+07	2.65412e+07	2.64601e+07	2.63762e+07	1.56651e+08	6691.26	6754.96	6835.62
3.69264e+07	3.69105e+07	3.68621e+07	3.67886e+07	3.66999e+07	3.66099e+07	2.17189e+08	8736.19	8772.7	8834.28		2.69984e+07	2.70001e+07	2.69647e+07	2.69002e+07	2.68172e+07	2.67313e+07	1.58773e+08	6777.58	6841.22	6922.16
3.8506e+07	3.8483e+07	3.84326e+07	3.83614e+07	3.82782e+07	3.81949e+07	2.26493e+08	8954.69	8982.04	9036.68		2.74023e+07	2.74028e+07	2.73658e+07	2.72993e+07	2.72142e+07	2.71266e+07	1.61133e+08	6868.57	6931.94	7012.97
3.67208e+07	3.67029e+07	3.66525e+07	3.65774e+07	3.64874e+07	3.63965e+07	2.1595e+08	8700.93	8739.03	8802.47		2.8173e+07	2.81721e+07	2.81334e+07	2.80651e+07	2.79779e+07	2.78882e+07	1.65657e+08	7033.61	7095.99	7176.67
3.63683e+07	3.63511e+07	3.63011e+07	3.6226e+07	3.61359e+07	3.60448e+07	2.13873e+08	8643.29	8683.31	8748.51		2.89061e+07	2.89039e+07	2.88639e+07	2.87945e+07	2.87063e+07	2.86155e+07	1.69966e+08	7189.03	7250.34	7330.6
3.62166e+07	3.61999e+07	3.61501e+07	3.60751e+07	3.59849e+07	3.58935e+07	2.12981e+08	8616.86	8657.64	8723.45		2.95524e+07	2.9549e+07	2.95077e+07	2.94368e+07	2.93475e+07	2.92558e+07	1.73762e+08	7324.6	7384.88	7464.66
3.64348e+07	3.6419e+07	3.63702e+07	3.6296e+07	3.62064e+07	3.61156e+07	2.14282e+08	8649.45	8688.55	8752.61		3.02363e+07	3.02318e+07	3.01897e+07	3.01185e+07	3.00291e+07	2.99375e+07	1.77789e+08	7460.47	7519.13	7597.78
3.88372e+07	3.88102e+07	3.87571e+07	3.86847e+07	3.86012e+07	3.85182e+07	2.28414e+08	8979.88	9000.79	9049.41		3.08044e+07	3.07988e+07	3.07562e+07	3.06848e+07	3.05954e+07	3.0504e+07	1.81134e+08	7572.12	7629.31	7706.93
3.5898e+07	3.58874e+07	3.58421e+07	3.57701e+07	3.56818e+07	3.55918e+07	2.11162e+08	8554.08	8598.36	8663.04		3.12629e+07	3.12566e+07	3.12136e+07	3.1142e+07	3.10528e+07	3.09615e+07	1.83834e+08	7661.39	7717.33	7794.03
3.48987e+07	3.48839e+07	3.48345e+07	3.47586e+07	3.46663e+07	3.45729e+07	2.05205e+08	8374.95	8419.99	8489.31		3.15497e+07	3.1543e+07	3.14999e+07	3.14285e+07	3.13395e+07	3.12483e+07	1.85526e+08	7715.91	7770.95	7846.96
3.44291e+07	3.44141e+07	3.43643e+07	3.42878e+07	3.41952e+07	3.41017e+07	2.02429e+08	8279.48	8325.06	8394.7		3.17641e+07	3.17571e+07	3.17139e+07	3.16427e+07	3.15538e+07	3.14627e+07	1.86791e+08	7756.38	7810.71	7886.16
3.40702e+07	3.40589e+07	3.40115e+07	3.39361e+07	3.38436e+07	3.37499e+07	2.00341e+08	8214.1	8257.71	8324.15		3.19368e+07	3.19304e+07	3.18877e+07	3.18168e+07	3.17283e+07	3.16378e+07	1.87817e+08	7785.91	7839.38	7914.11
3.38053e+07	3.37959e+07	3.37503e+07	3.36765e+07	3.35851e+07	3.34918e+07	1.98802e+08	8164.25	8208.82	8275.51		3.2111e+07	3.21058e+07	3.20657e+07	3.19983e+07	3.19126e+07	3.18244e+07	1.88879e+08	7807.44	7863.56	7940.14
3.35415e+07	3.35345e+07	3.3491e+07	3.34191e+07	3.33293e+07	3.32364e+07	1.97274e+08	8114.41	8160.14	8227.36		3.22108e+07	3.22032e+07	3.21609e+07	3.20919e+07	3.20064e+07	3.19193e+07	1.89445e+08	7812.87	7865.65	7940.43
3.35324e+07	3.35216e+07	3.34743e+07	3.33988e+07	3.33061e+07	3.32122e+07	1.97169e+08	8109.1	8153.32	8220.33		3.2179e+07	3.21697e+07	3.21262e+07	3.20562e+07	3.197e+07	3.18825e+07	1.89239e+08	7795.45	7845.78	7918.11
3.36122e+07	3.35974e+07	3.35471e+07	3.34705e+07	3.33782e+07	3.32853e+07	1.97607e+08	8118.7	8164	8234.72		3.20499e+07	3.20414e+07	3.19987e+07	3.19294e+07	3.18437e+07	3.17565e+07	1.88488e+08	7758.34	7805.76	7875.11
3.37976e+07	3.37832e+07	3.37338e+07	3.36576e+07	3.35655e+07	3.34726e+07	1.98709e+08	8155.77	8202.78	8273.43		3.1886e+07	3.18796e+07	3.18405e+07	3.17761e+07	3.16958e+07	3.16133e+07	1.87575e+08	7705.86	7757.45	7830.82
3.4178e+07	3.4163e+07	3.41124e+07	3.40349e+07	3.39416e+07	3.38478e+07	2.00939e+08	8230.25	8273.76	8341.64		3.14761e+07	3.14684e+07	3.14281e+07	3.13624e+07	3.1281e+07	3.11979e+07	1.85137e+08	7607.89	7657.61	7728.88
3.45411e+07	3.45284e+07	3.448e+07	3.4404e+07	3.43112e+07	3.42174e+07	2.03107e+08	8303.81	8346.47	8412.44		3.0888e+07	3.08793e+07	3.08381e+07	3.07717e+07	3.06897e+07	3.06062e+07	1.81655e+08	7477.3	7525.82	7595.53
3.49249e+07	3.49184e+07	3.48778e+07	3.48089e+07	3.47225e+07	3.46339e+07	2.05472e+08	8370.43	8424.21	8491.58		3.03836e+07	3.03746e+07	3.03327e+07	3.02656e+07	3.01833e+07	3.00998e+07	1.78671e+08	7362.77	7409.18	7476.5
3.53076e+07	3.52961e+07	3.52524e+07	3.51841e+07	3.51009e+07	3.50168e+07	2.07707e+08	8422.17	8470.03	8542.68		2.99039e+07	2.98981e+07	2.98592e+07	2.97947e+07	2.97143e+07	2.96322e+07	1.7588e+08	7260.11	7304.82	7370.17
3.56452e+07	3.563e+07	3.55832e+07	3.55124e+07	3.54273e+07	3.53416e+07	2.09656e+08	8472.8	8515.93	8584.34		2.94885e+07	2.94858e+07	2.94499e+07	2.93875e+07	2.93089e+07	2.92284e+07	1.73467e+08	7169.64	7221.2	7286.4
3.5801e+07	3.57834e+07	3.57347e+07	3.56623e+07	3.55758e+07	3.54885e+07	2.10547e+08	8494.28	8534.22	8599.72		2.92209e+07	2.92179e+07	2.91834e+07	2.91245e+07	2.90491e+07	2.89704e+07	1.7191e+08	7107.05	7159.63	7231.54
3.59875e+07	3.59681e+07	3.59177e+07	3.58439e+07	3.57561e+07	3.56675e+07	2.11625e+08	8523.39	8560.26	8622.92		2.94011e+07	2.9397e+07	2.93617e+07	2.93021e+07	2.92275e+07	2.91511e+07	1.72966e+08	7137.29	7188.43	7259.56
3.61182e+07	3.60979e+07	3.60468e+07	3.59722e+07	3.58835e+07	3.57942e+07	2.12384e+08	8544.54	8579.41	8640.13		2.98202e+07	2.98147e+07	2.97782e+07	2.97176e+07	2.96423e+07	2.95656e+07	1.75424e+08	7217.36	7266.81	7336.59
3.61868e+07	3.61663e+07	3.61148e+07	3.60397e+07	3.59505e+07	3.58608e+07	2.12783e+08	8555.34	8588.9	8648.22		3.03319e+07	3.03249e+07	3.02871e+07	3.02255e+07	3.01494e+07	3.00721e+07	1.78426e+08	7315.98	7363.58	7431.93
3.61934e+07	3.61732e+07	3.61216e+07	3.60463e+07	3.59568e+07	3.58667e+07	2.12822e+08	8555.35	8588.17	8646.5		3.10006e+07	3.09937e+07	3.09558e+07	3.08941e+07	3.08172e+07	3.07373e+07	1.82368e+08	7461.25	7509.13	7578.22
3.65114e+07	3.64934e+07	3.64441e+07	3.63708e+07	3.62829e+07	3.61939e+07	2.14729e+08	8608.27	8639.85	8696.43		3.17442e+07	3.17355e+07	3.1694e+07	3.16274e+07	3.15454e+07	3.14619e+07	1.86706e+08	7621.59	7663.24	7724.57
3.68541e+07	3.68395e+07	3.67938e+07	3.67243e+07	3.66404e+07	3.6555e+07	2.16805e+08	8656.99	8692.1	8747.77		3.25152e+07	3.2502e+07	3.24573e+07	3.23881e+07	3.23041e+07	3.2219e+07	1.91209e+08	7775.21	7813.57	7874.66
3.70406e+07	3.70233e+07	3.6978e+07	3.69111e+07	3.68313e+07	3.6751e+07	2.17915e+08	8668.16	8702.66	8763.29		3.29114e+07	3.28965e+07	3.28504e+07	3.27805e+07	3.26963e+07	3.26112e+07	1.93531e+08	7856.25	7895.05	7956.82
3.6944e+07	3.69241e+07	3.68764e+07	3.68077e+07	3.67265e+07	3.66451e+07	2.17313e+08	8630.49	8662.18	8720.12		3.32244e+07	3.32097e+07	3.31642e+07	3.3095e+07	3.30113e+07	3.29267e+07	1.95385e+08	7924.69	7964.52	8027.49
3.68852e+07	3.68623e+07	3.68122e+07	3.67416e+07	3.6659e+07	3.65767e+07	2.16933e+08	8600.69	8629.01	8683.75		3.36571e+07	3.36448e+07	3.36012e+07	3.35334e+07	3.34511e+07	3.3368e+07	1.97966e+08	8035.36	8079.13	8146.19
3.69201e+07	3.68942e+07	3.68416e+07	3.67691e+07	3.66855e+07	3.66025e+07	2.17106e+08	8586.84	8610.62	8661.07		3.40385e+07	3.40279e+07	3.39835e+07	3.39132e+07	3.38272e+07	3.37396e+07	2.00203e+08	8140.82	8183.83	8247.64
3.69439e+07	3.69163e+07	3.68626e+07	3.67897e+07	3.67061e+07	3.66233e+07	2.17233e+08	8574.2	8594	8640.44		3.44029e+07	3.43879e+07	3.43401e+07	3.42673e+07	3.41793e+07	3.40904e+07	2.02306e+08	8220.42	8262.44	8328.3
3.68716e+07	3.68461e+07	3.67946e+07	3.67238e+07	3.66424e+07	3.65618e+07	2.16838e+08	8546.32	8564.51	8608.7		3.47132e+07	3.46992e+07	3.46526e+07	3.45808e+07	3.44936e+07	3.44053e+07	2.04153e+08	8290.83	8334.48	8402.19
3.68059e+07	3.67833e+07	3.67353e+07	3.66682e+07	3.65901e+07	3.65121e+07	2.16498e+08	8524.64	8542.66	8586.52		3.47889e+07	3.47767e+07	3.47317e+07	3.46614e+07	3.45757e+07	3.44888e+07	2.04623e+08	8319.89	8366.32	8436.8
3.6759e+07	3.67395e+07	3.66954e+07	3.66315e+07	3.65564e+07	3.64812e+07	2.1627e+08	8501.23	8526.35	8569.93		3.45096e+07	3.44994e+07	3.44543e+07	3.43825e+07	3.42942e+07	3.42044e+07	2.02972e+08	8286.48	8332.88	8401.88
3.66932e+07	3.66727e+07	3.66288e+07	3.65676e+07	3.64966e+07	3.64252e+07	2.15897e+08	8473.02	8496.59	8546.31		3.43897e+07	3.43776e+07	3.43306e+07	3.42568e+07	3.41667e+07	3.40754e+07	2.02236e+08	8267.77	8314.45	8384.42
3.66089e+07	3.65876e+07	3.65433e+07	3.6482e+07	3.6411e+07	3.63403e+07	2.15394e+08	8445.48	8467.91	8516.49		3.45407e+07	3.45276e+07	3.44799e+07	3.44055e+07	3.43146e+07	3.42225e+07	2.03116e+08	8299.97	8346.59	8416.68
3.65751e+07	3.65535e+07	3.65091e+07	3.64477e+07	3.63766e+07	3.63057e+07	2.15193e+08	8434.84	8456.83	8504.98		3.47985e+07	3.4785e+07	3.47369e+07	3.46622e+07	3.45711e+07	3.44786e+07	2.04632e+08	8351.8	8397.76	8467.49
3.65502e+07	3.65284e+07	3.64838e+07	3.64223e+07	3.63512e+07	3.62801e+07	2.15043e+08	8427.01	8448.69	8496.52		3.52125e+07	3.51981e+07	3.51497e+07	3.5075e+07	3.49843e+07	3.48922e+07	2.07071e+08	8430.22	8474.66	8543.28
3.65342e+07	3.65122e+07	3.64675e+07	3.6406e+07	3.63348e+07	3.62636e+07	2.14947e+08	8421.98	8443.44	8491.07		3.54569e+07	3.54418e+07	3.5393e+07	3.53183e+07	3.52279e+07	3.51361e+07	2.08509e+08	8474.72	8518.15	8585.98
3.65374e+07	3.65156e+07	3.64709e+07	3.64094e+07	3.63383e+07	3.62671e+07	2.14967e+08	8423.98	8445.61	8493.4		3.56379e+07	3.56223e+07	3.55733e+07	3.54985e+07	3.54082e+07	3.53167e+07	2.09575e+08	8507.34	8549.98	8617.2
3.65189e+07	3.64976e+07	3.64533e+07	3.63918e+07	3.63206e+07	3.62494e+07	2.14862e+08	8426.75	8449.2	8497.74		3.58457e+07	3.58296e+07	3.57802e+07	3.57054e+07	3.56152e+07	3.5524e+07	2.10798e+08	8544.19	8585.9	8652.37
3.64561e+07	3.64354e+07	3.63915e+07	3.63302e+07	3.62588e+07	3.61872e+07	2.14495e+08	8423.49	8447.15	8496.82		3.61325e+07	3.61156e+07	3.60658e+07	3.5991e+07	3.5901e+07	3.58101e+07	2.12485e+08	8594.28	8634.63	8700
3.63639e+07	3.63441e+07	3.63007e+07	3.62395e+07	3.61679e+07	3.6096e+07	2.13957e+08	8416.34	8441.51	8492.58		3.64487e+07	3.64309e+07	3.63807e+07	3.63058e+07	3.62162e+07	3.61257e+07	2.14347e+08	8648.29	8687.02	8751.06
3.64601e+07	3.64411e+07	3.63981e+07	3.63371e+07	3.62658e+07	3.61931e+07	2.14531e+08	8444.62	8470.74	8522.76		3.72373e+07	3.72193e+07	3.71699e+07	3.70965e+07	3.70086e+07	3.69198e+07	2.19012e+08	8776.37	8810.43	8870.19
3.65114e+07	3.64932e+07	3.64504e+07	3.63873e+07	3.63122e+07	3.62366e+07	2.14822e+08	8467.09	8494.57	8541.25		3.79736e+07	3.79534e+07	3.79035e+07	3.78311e+07	3.77451e+07	3.76584e+07	2.23354e+08	8887.95	8917.05	8972.58
3.65214e+07	3.65013e+07	3.64548e+07	3.63885e+07	3.63108e+07	3.62328e+07	2.1484e+08	8484.48	8504.73	8550.31		3.78899e+07	3.78695e+07	3.78194e+07	3.77465e+07	3.76599e+07	3.75729e+07	2.22855e+08	8876.24	8906.72	8963.42
3.66629e+07	3.66401e+07	3.65912e+07	3.65226e+07	3.64428e+07	3.63632e+07	2.1564e+08	8510.4	8529.74	8574.75		3.77247e+07	3.77058e+07	3.76565e+07	3.75841e+07	3.74978e+07	3.74106e+07	2.21893e+08	8852.24	8883.92	8941.61
3.686e+07	3.68342e+07	3.67823e+07	3.67112e+07	3.66294e+07	3.65485e+07	2.16764e+08	8546.3	8564.66	8609.05		3.75731e+07	3.7556e+07	3.75089e+07	3.74377e+07	3.73522e+07	3.72657e+07	2.21021e+08	8824.24	8861.31	8920.28
3.70445e+07	3.70166e+07	3.69632e+07	3.68909e+07	3.68083e+07	3.67266e+07	2.17831e+08	8580.32	8598.17	8642.54		3.77348e+07	3.77153e+07	3.76666e+07	3.75957e+07	3.75118e+07	3.74277e+07	2.21964e+08	8838.38	8872.25	8932.76
3.71733e+07	3.71449e+07	3.7091e+07	3.70184e+07	3.69355e+07	3.68535e+07	2.18585e+08	8605.35	8623.44	8668.35		3.75862e+07	3.75671e+07	3.75185e+07	3.74476e+07	3.73635e+07	3.7279e+07	2.21088e+08	8814.62	8849.43	8910.77
3.73077e+07	3.72793e+07	3.72256e+07	3.71532e+07	3.70704e+07	3.69884e+07	2.1938e+08	8632.38	8651.18	8696.97		3.73369e+07	3.73194e+07	3.7272e+07	3.72017e+07	3.71178e+07	3.70334e+07	2.19632e+08	8779.11	8816.48	8880.13
3.74424e+07	3.74146e+07	3.73616e+07	3.72898e+07	3.72074e+07	3.71258e+07	2.20183e+08	8660.88	8680.67	8727.54		3.70663e+07	3.70515e+07	3.70049e+07	3.69333e+07	3.68468e+07	3.67589e+07	2.18039e+08	8745.22	8785.13	8845.86
3.76471e+07	3.76204e+07	3.75685e+07	3.74978e+07	3.74165e+07	3.73358e+07	2.21408e+08	8702.54	8723.28	8771.16		3.68451e+07	3.68286e+07	3.67799e+07	3.67064e+07	3.66177e+07	3.65277e+07	2.16705e+08	8713.46	8749.58	8810.76
3.77753e+07	3.775e+07	3.76995e+07	3.76301e+07	3.75498e+07	3.74698e+07	2.22183e+08	8736.04	8758.38	8807.85		3.66612e+07	3.66442e+07	3.65944e+07	3.65194e+07	3.64292e+07	3.63382e+07	2.15604e+08	8682.28	8718.81	8780.33
3.78377e+07	3.78144e+07	3.77655e+07	3.76973e+07	3.76179e+07	3.75386e+07	2.22573e+08	8762.84	8787.42	8839.04		3.64769e+07	3.64589e+07	3.64079e+07	3.63319e+07	3.62409e+07	3.61492e+07	2.14502e+08	8649.8	8686.77	8748.9
3.80733e+07	3.80509e+07	3.80032e+07	3.79363e+07	3.78584e+07	3.77805e+07	2.23981e+08	8810.34	8834.97	8886.77		3.62388e+07	3.62204e+07	3.61693e+07	3.60932e+07	3.60023e+07	3.59106e+07	2.13094e+08	8606.35	8644.82	8708.9
3.8287e+07	3.82649e+07	3.82178e+07	3.81519e+07	3.80742e+07	3.79957e+07	2.25249e+08	8854.2	8878.86	8929.78		3.60091e+07	3.59918e+07	3.59416e+07	3.5866e+07	3.57752e+07	3.56834e+07	2.11749e+08	8568.62	8608.73	8673.94
3.83943e+07	3.83717e+07	3.83228e+07	3.82545e+07	3.8175e+07	3.80955e+07	2.25861e+08	8878.94	8900.74	8947.69		3.58e+07	3.57831e+07	3.5733e+07	3.56573e+07	3.55662e+07	3.54741e+07	2.10516e+08	8531.33	8572.27	8638.17
3.85121e+07	3.84877e+07	3.84378e+07	3.83689e+07	3.82891e+07	3.82096e+07	2.26541e+08	8895.46	8914.37	8960.45		3.53974e+07	3.53817e+07	3.53324e+07	3.52573e+07	3.51664e+07	3.50742e+07	2.08151e+08	8462.15	8505.12	8572.68
3.8646e+07	3.862e+07	3.85688e+07	3.8499e+07	3.84186e+07	3.83387e+07	2.27314e+08	8913.1	8930.9	8976.04		3.51395e+07	3.51245e+07	3.50754e+07	3.50003e+07	3.49094e+07	3.48172e+07	2.06633e+08	8416.04	8460.1	8528.52
3.87773e+07	3.87498e+07	3.86975e+07	3.86269e+07	3.85463e+07	3.84665e+07	2.28075e+08	8929.62	8946.28	8990.45		3.50413e+07	3.50264e+07	3.49775e+07	3.49024e+07	3.48114e+07	3.4719e+07	2.06054e+08	8397.92	8442.32	8511.01
3.87852e+07	3.8758e+07	3.87062e+07	3.86362e+07	3.85562e+07	3.8477e+07	2.28129e+08	8925.15	8941.35	8985.08		3.50433e+07	3.50283e+07	3.49793e+07	3.4904e+07	3.48126e+07	3.472e+07	2.06064e+08	8396.8	8440.99	8509.51
3.87994e+07	3.87724e+07	3.87211e+07	3.8652e+07	3.85729e+07	3.84946e+07	2.28221e+08	8920.11	8935.68	8978.81		3.50458e+07	3.50305e+07	3.4981e+07	3.49052e+07	3.48134e+07	3.47205e+07	2.06072e+08	8394.74	8438.58	8506.81
3.88223e+07	3.87959e+07	3.87462e+07	3.86787e+07	3.86012e+07	3.85244e+07	2.28375e+08	8911.9	8929.28	8972.18		3.49611e+07	3.49459e+07	3.48964e+07	3.48205e+07	3.47287e+07	3.46356e+07	2.05572e+08	8378.82	8422.92	8491.35
3.87477e+07	3.87219e+07	3.86728e+07	3.86059e+07	3.8529e+07	3.84526e+07	2.27943e+08	8897.13	8914.58	8957.78		3.55185e+07	3.55056e+07	3.54608e+07	3.53918e+07	3.53082e+07	3.52238e+07	2.08937e+08	8453.09	8498.82	8569.52
3.87087e+07	3.86833e+07	3.86348e+07	3.85686e+07	3.84922e+07	3.84161e+07	2.2772e+08	8889.65	8908.19	8952.47		3.84316e+07	3.84047e+07	3.83518e+07	3.82798e+07	3.8197e+07	3.81149e+07	2.26025e+08	8890.16	8909.85	8956.75
3.87253e+07	3.86998e+07	3.86512e+07	3.85848e+07	3.85082e+07	3.84321e+07	2.27816e+08	8891.89	8910.31	8953.87		3.87782e+07	3.8749e+07	3.86951e+07	3.86228e+07	3.85404e+07	3.84587e+07	2.28055e+08	8933.95	8950.67	8995.17
3.87528e+07	3.87268e+07	3.86777e+07	3.86109e+07	3.8534e+07	3.84576e+07	2.27972e+08	8897.27	8914.63	8958.06		3.87922e+07	3.87637e+07	3.87101e+07	3.86379e+07	3.85554e+07	3.84736e+07	2.28142e+08	8941.2	8958.52	9003.51
3.87486e+07	3.87227e+07	3.86736e+07	3.86068e+07	3.85299e+07	3.84535e+07	2.27948e+08	8897.03	8914.45	8957.73		3.49756e+07	3.49602e+07	3.49105e+07	3.48346e+07	3.47427e+07	3.46496e+07	2.05656e+08	8380.71	8424.65	8492.95
3.87102e+07	3.86846e+07	3.8636e+07	3.85702e+07	3.8494e+07	3.84181e+07	2.2773e+08	8887.82	8906.11	8950.76		3.50696e+07	3.50545e+07	3.50055e+07	3.49301e+07	3.48386e+07	3.4746e+07	2.06218e+08	8401.23	8445.28	8513.69
3.86838e+07	3.86575e+07	3.86086e+07	3.85429e+07	3.84679e+07	3.83939e+07	2.27574e+08	8872.17	8889.24	8934.11		3.52569e+07	3.52409e+07	3.5191e+07	3.51151e+07	3.50233e+07	3.49305e+07	2.07313e+08	8432.15	8475.05	8542.53
3.8663e+07	3.8636e+07	3.85866e+07	3.85208e+07	3.84461e+07	3.83722e+07	2.27446e+08	8857.8	8873.65	8917.35		3.54125e+07	3.53952e+07	3.53444e+07	3.52679e+07	3.5176e+07	3.50833e+07	2.08219e+08	8456.18	8497.83	8564.34
3.86447e+07	3.86172e+07	3.85675e+07	3.85017e+07	3.8427e+07	3.83531e+07	2.27334e+08	8845.64	8860.49	8903.2		3.55514e+07	3.55363e+07	3.54868e+07	3.54108e+07	3.53188e+07	3.52258e+07	2.09056e+08	8485.44	8525.4	8589.51
3.86577e+07	3.86301e+07	3.85804e+07	3.85146e+07	3.84398e+07	3.83657e+07	2.2741e+08	8846.85	8861.54	8903.97		3.56273e+07	3.56143e+07	3.55671e+07	3.54934e+07	3.54035e+07	3.53119e+07	2.09536e+08	8500.58	8541.11	8605.4
3.86996e+07	3.8672e+07	3.86221e+07	3.85558e+07	3.84806e+07	3.84063e+07	2.27654e+08	8859.76	8874.15	8916.34		3.55448e+07	3.55308e+07	3.54824e+07	3.54074e+07	3.53162e+07	3.52236e+07	2.09032e+08	8484.99	8525.32	8589.49
3.87393e+07	3.87117e+07	3.86616e+07	3.8595e+07	3.85195e+07	3.8445e+07	2.27886e+08	8871.29	8886.06	8928.64		3.50504e+07	3.50334e+07	3.49826e+07	3.49058e+07	3.48136e+07	3.47206e+07	2.06082e+08	8388.81	8430.98	8498.37
3.87162e+07	3.86903e+07	3.86416e+07	3.85759e+07	3.85002e+07	3.84248e+07	2.27765e+08	8885	8902.82	8947.88		3.45182e+07	3.45034e+07	3.4454e+07	3.43779e+07	3.42856e+07	3.41922e+07	2.02959e+08	8294.28	8339.6	8408.97
3.86706e+07	3.8646e+07	3.85973e+07	3.85301e+07	3.84526e+07	3.83755e+07	2.27493e+08	8894.66	8914.31	8957.97		3.39804e+07	3.39671e+07	3.39185e+07	3.38428e+07	3.37504e+07	3.36568e+07	1.99796e+08	8195.59	8242.99	8313.98
3.86365e+07	3.86114e+07	3.85614e+07	3.8493e+07	3.84141e+07	3.83356e+07	2.27276e+08	8903.69	8920.99	8965.63		3.33381e+07	3.33266e+07	3.32795e+07	3.32048e+07	3.31131e+07	3.30196e+07	1.96024e+08	8077.78	8127.71	8200.65
3.85713e+07	3.85461e+07	3.84955e+07	3.84259e+07	3.83457e+07	3.82658e+07	2.26881e+08	8904.38	8922.88	8968.61		3.2727e+07	3.27167e+07	3.26703e+07	3.2596e+07	3.25046e+07	3.24114e+07	1.92429e+08	7961.73	8013.64	8088.07
3.846e+07	3.84349e+07	3.83836e+07	3.83128e+07	3.82309e+07	3.81496e+07	2.26213e+08	8898.95	8918.95	8966.02		3.27903e+07	3.27854e+07	3.27437e+07	3.26728e+07	3.2583e+07	3.24899e+07	1.9286e+08	7961.89	8008.79	8076.33
3.83105e+07	3.82853e+07	3.8233e+07	3.81608e+07	3.80774e+07	3.79945e+07	2.25318e+08	8887.37	8909	8957.58		3.87285e+07	3.86971e+07	3.86453e+07	3.85788e+07	3.85046e+07	3.84317e+07	2.27801e+08	8806.42	8814.53	8850.69
3.82878e+07	3.82619e+07	3.8209e+07	3.81361e+07	3.80519e+07	3.79683e+07	2.25174e+08	8888.82	8910.93	8960.1		3.47717e+07	3.47525e+07	3.47042e+07	3.46338e+07	3.45505e+07	3.44669e+07	2.04482e+08	8208.33	8241.67	8299.49
3.83447e+07	3.83184e+07	3.82653e+07	3.81922e+07	3.81079e+07	3.80242e+07	2.25506e+08	8898.14	8920.03	8969.09		3.08136e+07	3.08074e+07	3.07638e+07	3.06911e+07	3.06003e+07	3.05073e+07	1.81173e+08	7589.86	7647.54	7726.05
3.8338e+07	3.83118e+07	3.82587e+07	3.81857e+07	3.81014e+07	3.80177e+07	2.25467e+08	8897.03	8918.94	8968.01		3.08884e+07	3.08823e+07	3.08388e+07	3.07662e+07	3.06754e+07	3.05825e+07	1.81616e+08	7604.4	7662.02	7740.48
3.82769e+07	3.8251e+07	3.81982e+07	3.81253e+07	3.80411e+07	3.79575e+07	2.2511e+08	8887.18	8909.36	8958.57		3.10283e+07	3.10221e+07	3.09786e+07	3.0906e+07	3.08153e+07	3.07224e+07	1.82441e+08	7631.51	7688.85	7767.08
3.82328e+07	3.82074e+07	3.81549e+07	3.80822e+07	3.79982e+07	3.79146e+07	2.24854e+08	8879.65	8902.01	8951.31		3.12463e+07	3.12398e+07	3.1196e+07	3.11234e+07	3.10327e+07	3.09398e+07	1.83725e+08	7674.23	7731.05	7808.91
3.83434e+07	3.83171e+07	3.8264e+07	3.8191e+07	3.81067e+07	3.8023e+07	2.25499e+08	8897.82	8919.7	8968.75		3.15623e+07	3.15553e+07	3.15112e+07	3.14384e+07	3.13476e+07	3.12548e+07	1.85586e+08	7736.06	7792.08	7869.38
3.84188e+07	3.83922e+07	3.83388e+07	3.82655e+07	3.8181e+07	3.80972e+07	2.2594e+08	8911.28	8933.1	8982.24		3.19222e+07	3.19146e+07	3.18702e+07	3.17972e+07	3.17063e+07	3.16134e+07	1.87705e+08	7806.07	7861.16	7937.77
3.84448e+07	3.84181e+07	3.83646e+07	3.82912e+07	3.82067e+07	3.81227e+07	2.26092e+08	8917.07	8939.09	8988.51		3.21756e+07	3.21675e+07	3.21228e+07	3.20496e+07	3.19587e+07	3.18657e+07	1.89196e+08	7855.5	7909.9	7986.03
3.84324e+07	3.84059e+07	3.83524e+07	3.8279e+07	3.81942e+07	3.81101e+07	2.26019e+08	8916.98	8939.37	8989.15		3.23188e+07	3.23105e+07	3.22656e+07	3.21923e+07	3.21013e+07	3.20083e+07	1.90039e+08	7883.32	7937.33	8013.17
3.8464e+07	3.84373e+07	3.83838e+07	3.83105e+07	3.82258e+07	3.81418e+07	2.26205e+08	8921.49	8943.72	8993.38		3.24499e+07	3.24414e+07	3.23964e+07	3.2323e+07	3.22319e+07	3.21388e+07	1.90811e+08	7908.28	7961.91	8037.46
3.85571e+07	3.85301e+07	3.84767e+07	3.84034e+07	3.83191e+07	3.82354e+07	2.26755e+08	8933.52	8955.08	9004.15		3.25515e+07	3.25428e+07	3.24976e+07	3.2424e+07	3.23328e+07	3.22397e+07	1.91408e+08	7926.6	7979.91	8055.18
3.86431e+07	3.86159e+07	3.85624e+07	3.84894e+07	3.84054e+07	3.8322e+07	2.27262e+08	8944.63	8965.6	9014.16		3.26325e+07	3.26236e+07	3.25782e+07	3.25045e+07	3.24133e+07	3.23202e+07	1.91884e+08	7941.25	7994.29	8069.33
3.86894e+07	3.8662e+07	3.86085e+07	3.85354e+07	3.84515e+07	3.83681e+07	2.27535e+08	8950.91	8971.52	9019.72		3.27257e+07	3.27165e+07	3.2671e+07	3.25973e+07	3.2506e+07	3.2413e+07	1.92432e+08	7958.58	8011.31	8086.11
3.86868e+07	3.86595e+07	3.86059e+07	3.85329e+07	3.84489e+07	3.83654e+07	2.27519e+08	8951.93	8972.78	9021.21		3.2806e+07	3.27967e+07	3.2751e+07	3.26773e+07	3.2586e+07	3.2493e+07	1.92905e+08	7973.31	8025.76	8100.34
3.86729e+07	3.86458e+07	3.85923e+07	3.85193e+07	3.84351e+07	3.83515e+07	2.27438e+08	8952.38	8973.72	9022.63		3.28926e+07	3.2883e+07	3.28373e+07	3.27635e+07	3.26724e+07	3.25794e+07	1.93414e+08	7989.27	8041.43	8115.75
3.86814e+07	3.86546e+07	3.86013e+07	3.85283e+07	3.84441e+07	3.83604e+07	2.2749e+08	8957.02	8978.89	9028.33		3.2999e+07	3.29893e+07	3.29434e+07	3.28696e+07	3.27785e+07	3.26856e+07	1.94041e+08	8009.18	8060.98	8135.02
3.86862e+07	3.86598e+07	3.86068e+07	3.8534e+07	3.84498e+07	3.8366e+07	2.27522e+08	8961.85	8984.41	9034.53		3.29285e+07	3.29189e+07	3.28731e+07	3.27994e+07	3.27083e+07	3.26156e+07	1.93626e+08	7995.06	8047.04	8121.19
3.86636e+07	3.86379e+07	3.85853e+07	3.85128e+07	3.84287e+07	3.83449e+07	2.27395e+08	8963.27	8986.81	9037.87		3.28453e+07	3.28359e+07	3.27902e+07	3.27166e+07	3.26256e+07	3.25328e+07	1.93137e+08	7978.57	8030.76	8105.05
3.86253e+07	3.86004e+07	3.85485e+07	3.84763e+07	3.83924e+07	3.83088e+07	2.27177e+08	8962.72	8987.41	9039.57		3.28178e+07	3.28084e+07	3.27628e+07	3.26892e+07	3.25983e+07	3.25056e+07	1.92975e+08	7972.91	8025.16	8099.48
3.85845e+07	3.85605e+07	3.85093e+07	3.84376e+07	3.83541e+07	3.82707e+07	2.26946e+08	8961.86	8987.75	9041.05		3.29451e+07	3.29355e+07	3.28897e+07	3.28159e+07	3.27247e+07	3.26319e+07	1.93724e+08	7998.98	8050.95	8125.13
3.84722e+07	3.84497e+07	3.83996e+07	3.83286e+07	3.82455e+07	3.81622e+07	2.26298e+08	8952.06	8980.06	9035.3		3.31589e+07	3.31489e+07	3.31029e+07	3.30289e+07	3.29376e+07	3.28445e+07	1.94982e+08	8043.34	8094.85	8168.8
3.82917e+07	3.8271e+07	3.8222e+07	3.81517e+07	3.80687e+07	3.79855e+07	2.25248e+08	8933.07	8963.94	9021.83		3.58125e+07	3.57977e+07	3.57528e+07	3.56849e+07	3.56023e+07	3.55175e+07	2.10667e+08	8456.6	8495.87	8560.11
3.81447e+07	3.81249e+07	3.80765e+07	3.80063e+07	3.79233e+07	3.78392e+07	2.24387e+08	8914.3	8946.9	9006.43		3.8767e+07	3.87391e+07	3.8687e+07	3.86168e+07	3.85366e+07	3.84572e+07	2.28015e+08	8910.21	8923.72	8965.12
3.81129e+07	3.80934e+07	3.80451e+07	3.79749e+07	3.78917e+07	3.78071e+07	2.242e+08	8910.65	8943.65	9003.53		3.83422e+07	3.83179e+07	3.8268e+07	3.81989e+07	3.8119e+07	3.80392e+07	2.25538e+08	8862.26	8881.6	8927.95
3.81708e+07	3.81503e+07	3.81014e+07	3.80308e+07	3.79476e+07	3.78641e+07	2.24534e+08	8914.21	8945.94	9004.64		3.57129e+07	3.56931e+07	3.56419e+07	3.55668e+07	3.54773e+07	3.53873e+07	2.0999e+08	8463.15	8497.96	8558.25
3.82455e+07	3.82237e+07	3.81738e+07	3.81026e+07	3.8019e+07	3.79354e+07	2.24963e+08	8917.73	8947.63	9004.62		3.81418e+07	3.81179e+07	3.80674e+07	3.7997e+07	3.7915e+07	3.78333e+07	2.24345e+08	8845.57	8867.11	8915.4
3.82853e+07	3.82625e+07	3.82118e+07	3.81402e+07	3.80563e+07	3.79725e+07	2.25187e+08	8917.41	8945.93	9001.61		3.8846e+07	3.88166e+07	3.87626e+07	3.86906e+07	3.86085e+07	3.85273e+07	2.28456e+08	8939.64	8955.21	8998.64
3.82989e+07	3.82752e+07	3.82238e+07	3.81516e+07	3.80674e+07	3.79834e+07	2.25258e+08	8913.13	8940.36	8994.82		3.85739e+07	3.85451e+07	3.84913e+07	3.8419e+07	3.83364e+07	3.82548e+07	2.26851e+08	8899.85	8917.72	8963.4
3.83568e+07	3.83322e+07	3.82802e+07	3.82078e+07	3.81236e+07	3.80397e+07	2.25592e+08	8916.23	8942.12	8995.32		3.85138e+07	3.84856e+07	3.84319e+07	3.83594e+07	3.82763e+07	3.81939e+07	2.26498e+08	8898.78	8917.95	8964.76
3.84407e+07	3.84154e+07	3.8363e+07	3.82905e+07	3.82065e+07	3.81228e+07	2.26083e+08	8923.49	8948	8999.94		3.70061e+07	3.6984e+07	3.69327e+07	3.68594e+07	3.67733e+07	3.6687e+07	2.17627e+08	8686.87	8717.62	8774.5
3.85881e+07	3.8562e+07	3.85095e+07	3.84372e+07	3.83537e+07	3.82706e+07	2.26951e+08	8939.97	8962.99	9013.5		3.52515e+07	3.52371e+07	3.51886e+07	3.51139e+07	3.50232e+07	3.49311e+07	2.07301e+08	8437.03	8481.32	8549.8
3.8782e+07	3.87545e+07	3.87011e+07	3.86285e+07	3.85451e+07	3.84623e+07	2.28084e+08	8961.92	8982.15	9030.08		3.54478e+07	3.54328e+07	3.53839e+07	3.5309e+07	3.52182e+07	3.51263e+07	2.08454e+08	8469.4	8512.75	8580.38
3.89619e+07	3.89331e+07	3.88793e+07	3.88069e+07	3.87241e+07	3.8642e+07	2.2914e+08	8979.59	8997	9042.31		3.56442e+07	3.56294e+07	3.55809e+07	3.55065e+07	3.54163e+07	3.53252e+07	2.0962e+08	8501.13	8543.13	8609.46
3.90462e+07	3.90168e+07	3.89628e+07	3.88908e+07	3.88087e+07	3.87274e+07	2.29637e+08	8983.44	8999.04	9042.62		3.56836e+07	3.56708e+07	3.56256e+07	3.55554e+07	3.54693e+07	3.53811e+07	2.09898e+08	8497.12	8542.43	8612.13
3.90966e+07	3.9068e+07	3.90149e+07	3.89438e+07	3.88627e+07	3.87823e+07	2.29948e+08	8982.74	8996.9	9039.1		3.52797e+07	3.52655e+07	3.52189e+07	3.51477e+07	3.50617e+07	3.49746e+07	2.075e+08	8405.36	8448.79	8516.71
3.9124e+07	3.90977e+07	3.90472e+07	3.89785e+07	3.88997e+07	3.88214e+07	2.30145e+08	8975.32	8991.73	9032.66		3.48429e+07	3.48273e+07	3.47794e+07	3.47066e+07	3.46188e+07	3.453e+07	2.04901e+08	8306.48	8347.76	8413.23
3.91316e+07	3.91044e+07	3.90545e+07	3.89876e+07	3.89115e+07	3.88361e+07	2.30201e+08	8962.85	8978.67	9022.52		3.42009e+07	3.41871e+07	3.41402e+07	3.40677e+07	3.39797e+07	3.38908e+07	2.01125e+08	8177.11	8218.32	8283.22
3.91187e+07	3.90905e+07	3.904e+07	3.89731e+07	3.88972e+07	3.88223e+07	2.30119e+08	8943.59	8957.61	8999.72		3.33895e+07	3.33811e+07	3.33383e+07	3.32691e+07	3.31838e+07	3.30968e+07	1.96395e+08	8014.55	8061.29	8126.52
3.90768e+07	3.90476e+07	3.89966e+07	3.89297e+07	3.88541e+07	3.87796e+07	2.29865e+08	8918.52	8930.76	8971.14		3.26801e+07	3.26712e+07	3.26301e+07	3.25641e+07	3.2483e+07	3.24005e+07	1.92235e+08	7856.15	7904.51	7975.31
3.90263e+07	3.89966e+07	3.89453e+07	3.88783e+07	3.88028e+07	3.87284e+07	2.29564e+08	8900.78	8912.23	8951.82		3.21806e+07	3.21704e+07	3.21283e+07	3.20613e+07	3.1979e+07	3.18952e+07	1.8927e+08	7739.48	7785.85	7854.38
3.89819e+07	3.89519e+07	3.89005e+07	3.88335e+07	3.87581e+07	3.86839e+07	2.293e+08	8888.57	8899.68	8938.9		3.20659e+07	3.20568e+07	3.20154e+07	3.1949e+07	3.18672e+07	3.17837e+07	1.88604e+08	7722.15	7769.83	7839.54
3.89507e+07	3.89207e+07	3.88693e+07	3.88023e+07	3.87269e+07	3.86529e+07	2.29116e+08	8881.13	8892.12	8931.21		3.21647e+07	3.21566e+07	3.21161e+07	3.20507e+07	3.19696e+07	3.18869e+07	1.89201e+08	7751.71	7800.94	7872.23
3.89196e+07	3.88895e+07	3.8838e+07	3.87711e+07	3.86959e+07	3.8622e+07	2.28933e+08	8872.22	8882.93	8921.72		3.25071e+07	3.24993e+07	3.2459e+07	3.23936e+07	3.23129e+07	3.22306e+07	1.91225e+08	7828.29	7878.16	7950.3
3.89064e+07	3.88759e+07	3.88243e+07	3.87574e+07	3.86824e+07	3.86087e+07	2.28853e+08	8862.97	8872.97	8911.06		3.30381e+07	3.30301e+07	3.29896e+07	3.2923e+07	3.28394e+07	3.27537e+07	1.94345e+08	7940.6	7990.35	8058.99
3.8913e+07	3.88819e+07	3.88302e+07	3.87633e+07	3.86886e+07	3.86152e+07	2.2889e+08	8854.79	8863.77	8900.9		3.35031e+07	3.34918e+07	3.34468e+07	3.3376e+07	3.32892e+07	3.32009e+07	1.97034e+08	8041.93	8084.69	8150.57
3.88664e+07	3.88345e+07	3.87824e+07	3.87158e+07	3.86417e+07	3.85691e+07	2.28612e+08	8827.66	8834.78	8870.09		3.38049e+07	3.37914e+07	3.37445e+07	3.3672e+07	3.35842e+07	3.34953e+07	1.98789e+08	8105.26	8148.92	8215.93
3.87843e+07	3.87515e+07	3.86993e+07	3.86331e+07	3.85598e+07	3.84881e+07	2.28126e+08	8792.06	8797.24	8830.6		3.41181e+07	3.41037e+07	3.40564e+07	3.39838e+07	3.3896e+07	3.3807e+07	2.00631e+08	8166.8	8209.89	8276.58
3.86851e+07	3.86515e+07	3.85992e+07	3.85336e+07	3.84613e+07	3.83908e+07	2.27541e+08	8750.79	8753.86	8785.12		3.44106e+07	3.43958e+07	3.43483e+07	3.42756e+07	3.41877e+07	3.40988e+07	2.02355e+08	8224.02	8266.54	8332.89
3.85916e+07	3.85575e+07	3.85052e+07	3.84402e+07	3.83688e+07	3.82993e+07	2.26992e+08	8715.01	8716.49	8746.13		3.46571e+07	3.46419e+07	3.45942e+07	3.45215e+07	3.44337e+07	3.43449e+07	2.03807e+08	8271.83	8313.82	8379.84
3.84716e+07	3.8437e+07	3.8385e+07	3.83206e+07	3.82502e+07	3.81816e+07	2.26287e+08	8675.52	8675.63	8703.87		3.46907e+07	3.46752e+07	3.46269e+07	3.45537e+07	3.44656e+07	3.43766e+07	2.03999e+08	8272.66	8313.15	8377.74
3.83196e+07	3.82849e+07	3.82333e+07	3.81695e+07	3.80997e+07	3.80315e+07	2.25394e+08	8630.97	8629.97	8657.01		3.47027e+07	3.4688e+07	3.46406e+07	3.4568e+07	3.44802e+07	3.43913e+07	2.0408e+08	8270.57	8309.62	8372.81
3.81137e+07	3.80788e+07	3.80274e+07	3.79644e+07	3.78958e+07	3.78288e+07	2.24184e+08	8567.83	8565.22	8590.52		3.46476e+07	3.46346e+07	3.45887e+07	3.45175e+07	3.44309e+07	3.4343e+07	2.03776e+08	8258.21	8296.83	8359.22
3.78632e+07	3.78291e+07	3.77789e+07	3.77175e+07	3.76505e+07	3.75852e+07	2.22724e+08	8497.79	8493.9	8517.77		3.44554e+07	3.44445e+07	3.44014e+07	3.4332e+07	3.42467e+07	3.41598e+07	2.02672e+08	8214.95	8260.6	8323.01
3.75717e+07	3.75376e+07	3.74884e+07	3.74285e+07	3.73636e+07	3.73006e+07	2.21019e+08	8417.07	8413.74	8437.96		3.4314e+07	3.43022e+07	3.42589e+07	3.41915e+07	3.41094e+07	3.40262e+07	2.01848e+08	8176.95	8221.34	8289.46
3.74133e+07	3.73789e+07	3.73296e+07	3.72698e+07	3.72052e+07	3.71424e+07	2.20083e+08	8376.12	8372.2	8395.74		3.41653e+07	3.41522e+07	3.4108e+07	3.40399e+07	3.39574e+07	3.38742e+07	2.00958e+08	8135.05	8177.71	8244.05
3.72836e+07	3.72491e+07	3.71998e+07	3.71401e+07	3.70757e+07	3.70132e+07	2.19318e+08	8343.23	8338.88	8361.91		3.3915e+07	3.3901e+07	3.38561e+07	3.37875e+07	3.37049e+07	3.36215e+07	1.99472e+08	8074.77	8116.01	8180.82
3.7159e+07	3.71245e+07	3.70752e+07	3.70156e+07	3.69514e+07	3.68891e+07	2.18584e+08	8315.08	8310.62	8333.46		3.35967e+07	3.3582e+07	3.35366e+07	3.34678e+07	3.33848e+07	3.33007e+07	1.97586e+08	8002.41	8042.43	8105.85
3.70286e+07	3.69942e+07	3.6945e+07	3.68857e+07	3.68218e+07	3.676e+07	2.17817e+08	8283.57	8278.82	8301.28		3.32831e+07	3.32675e+07	3.32214e+07	3.31517e+07	3.30677e+07	3.29829e+07	1.95722e+08	7931.28	7969.9	8031.77
3.69024e+07	3.68681e+07	3.68192e+07	3.67604e+07	3.66969e+07	3.66355e+07	2.17076e+08	8251.9	8246.74	8268.72		3.31993e+07	3.31845e+07	3.31387e+07	3.30689e+07	3.29846e+07	3.28995e+07	1.95232e+08	7905.23	7941.28	8000.63
3.67826e+07	3.67483e+07	3.66997e+07	3.66412e+07	3.65783e+07	3.65175e+07	2.16373e+08	8220.78	8215.14	8236.58		3.3112e+07	3.31013e+07	3.30605e+07	3.29946e+07	3.29134e+07	3.28305e+07	1.94776e+08	7876.15	7918.58	7976.88
3.671e+07	3.66761e+07	3.6628e+07	3.65703e+07	3.65079e+07	3.64475e+07	2.15952e+08	8204.92	8200.53	8222.69		3.30174e+07	3.30049e+07	3.29631e+07	3.28988e+07	3.28209e+07	3.2742e+07	1.9422e+08	7838.97	7879.02	7941.98
3.66768e+07	3.66428e+07	3.65947e+07	3.6537e+07	3.6475e+07	3.64151e+07	2.15757e+08	8198.48	8194.1	8216.79		3.28985e+07	3.28843e+07	3.28413e+07	3.27762e+07	3.26978e+07	3.26187e+07	1.93502e+08	7798.7	7836.51	7897.24
3.66472e+07	3.66131e+07	3.6565e+07	3.65073e+07	3.64453e+07	3.63856e+07	2.15582e+08	8191.25	8186.74	8209.3		3.28894e+07	3.28737e+07	3.28296e+07	3.27638e+07	3.26851e+07	3.26059e+07	1.93433e+08	7783.1	7818.77	7877.45
3.65542e+07	3.652e+07	3.64718e+07	3.6414e+07	3.63521e+07	3.62925e+07	2.15032e+08	8169.49	8164.69	8186.9		3.30641e+07	3.30477e+07	3.30032e+07	3.29372e+07	3.28584e+07	3.27792e+07	1.94459e+08	7812.71	7847.32	7905.1
3.64337e+07	3.63991e+07	3.63509e+07	3.62933e+07	3.62316e+07	3.61723e+07	2.1432e+08	8139.11	8133.74	8155.32		3.31181e+07	3.31017e+07	3.30571e+07	3.29911e+07	3.29123e+07	3.28331e+07	1.94777e+08	7823.33	7857.85	7915.58
3.62507e+07	3.62159e+07	3.61675e+07	3.61101e+07	3.60489e+07	3.599e+07	2.13241e+08	8093.78	8087.57	8108.24		3.31933e+07	3.31769e+07	3.31322e+07	3.30662e+07	3.29875e+07	3.29083e+07	1.95221e+08	7837.97	7872.34	7929.98
3.61175e+07	3.60825e+07	3.60341e+07	3.59767e+07	3.59155e+07	3.58566e+07	2.12454e+08	8066.46	8060.06	8080.46		3.32821e+07	3.32655e+07	3.32208e+07	3.31548e+07	3.30761e+07	3.29969e+07	1.95744e+08	7855.19	7889.38	7946.91
3.60321e+07	3.59971e+07	3.59486e+07	3.58911e+07	3.58296e+07	3.57705e+07	2.11948e+08	8052.25	8045.94	8066.38		3.33412e+07	3.33247e+07	3.32801e+07	3.32141e+07	3.31354e+07	3.30563e+07	1.96094e+08	7867.67	7901.9	7959.5
3.60155e+07	3.59807e+07	3.59321e+07	3.58743e+07	3.58124e+07	3.57527e+07	2.11848e+08	8056.21	8050.4	8071.31		3.34016e+07	3.3385e+07	3.33404e+07	3.32744e+07	3.31958e+07	3.31167e+07	1.9645e+08	7879.51	7913.64	7971.18
3.61276e+07	3.60932e+07	3.60446e+07	3.59861e+07	3.59234e+07	3.58626e+07	2.12507e+08	8095.17	8090.73	8113.05		3.34283e+07	3.34116e+07	3.3367e+07	3.3301e+07	3.32224e+07	3.31433e+07	1.96607e+08	7884.7	7918.77	7976.28
3.62943e+07	3.62606e+07	3.62119e+07	3.61529e+07	3.60891e+07	3.60273e+07	2.13489e+08	8149.38	8146.79	8171.03		3.33362e+07	3.33199e+07	3.32754e+07	3.32095e+07	3.31308e+07	3.30517e+07	1.96066e+08	7868.48	7902.99	7960.86
3.64587e+07	3.64258e+07	3.63771e+07	3.63176e+07	3.62529e+07	3.61902e+07	2.14459e+08	8203.07	8202.42	8228.66		3.32408e+07	3.32249e+07	3.31807e+07	3.31149e+07	3.30363e+07	3.29572e+07	1.95506e+08	7852.85	7888	7946.42
3.66093e+07	3.6577e+07	3.65285e+07	3.64687e+07	3.64034e+07	3.634e+07	2.15349e+08	8249.77	8250.76	8278.67		3.32338e+07	3.32189e+07	3.31755e+07	3.31101e+07	3.30317e+07	3.29527e+07	1.95475e+08	7860.92	7897.51	7957.3
3.67538e+07	3.67223e+07	3.6674e+07	3.66139e+07	3.6548e+07	3.64839e+07	2.16204e+08	8295.82	8298.51	8328.17		3.3359e+07	3.33457e+07	3.33033e+07	3.32388e+07	3.31608e+07	3.3082e+07	1.96229e+08	7901.22	7939.84	8001.65
3.68919e+07	3.68611e+07	3.6813e+07	3.67528e+07	3.66864e+07	3.66219e+07	2.17022e+08	8337.17	8341.26	8372.34		3.36463e+07	3.36339e+07	3.35925e+07	3.35282e+07	3.34483e+07	3.33663e+07	1.97927e+08	7971.52	8011.41	8071.8
3.69517e+07	3.69211e+07	3.68731e+07	3.68129e+07	3.67466e+07	3.66821e+07	2.17376e+08	8350.66	8354.92	8386.2		3.40529e+07	3.40369e+07	3.39908e+07	3.39215e+07	3.3838e+07	3.37536e+07	2.00266e+08	8061.3	8093.13	8149.03
3.69529e+07	3.69222e+07	3.68742e+07	3.6814e+07	3.67477e+07	3.66832e+07	2.17383e+08	8349.73	8353.88	8385.06		3.44183e+07	3.44002e+07	3.43526e+07	3.42826e+07	3.41994e+07	3.41154e+07	2.02406e+08	8145.85	8180.96	8240.24
3.68922e+07	3.68611e+07	3.68131e+07	3.67529e+07	3.66869e+07	3.66226e+07	2.17023e+08	8331.13	8334.65	8365.17		3.47624e+07	3.47463e+07	3.47001e+07	3.46308e+07	3.45478e+07	3.44643e+07	2.04455e+08	8233.21	8271.53	8334.13
3.67887e+07	3.67569e+07	3.67087e+07	3.66488e+07	3.65835e+07	3.652e+07	2.16411e+08	8292.32	8294.09	8322.86		3.51328e+07	3.51188e+07	3.50741e+07	3.5006e+07	3.49237e+07	3.48407e+07	2.06662e+08	8326.54	8367.54	8432.97
3.66618e+07	3.66292e+07	3.65808e+07	3.65214e+07	3.64569e+07	3.63944e+07	2.15662e+08	8246.21	8246.04	8272.85		3.56507e+07	3.56347e+07	3.55869e+07	3.55148e+07	3.5428e+07	3.53401e+07	2.09671e+08	8442.72	8477.2	8536.65
3.65002e+07	3.64668e+07	3.64183e+07	3.63594e+07	3.62957e+07	3.62341e+07	2.14708e+08	8193.86	8191.83	8216.74		3.60603e+07	3.60414e+07	3.59913e+07	3.59176e+07	3.583e+07	3.57418e+07	2.12059e+08	8520.69	8555.17	8614.94
3.62438e+07	3.62094e+07	3.61609e+07	3.61027e+07	3.60403e+07	3.59801e+07	2.13195e+08	8114.59	8110.03	8132.32		3.63505e+07	3.63308e+07	3.62808e+07	3.62078e+07	3.61209e+07	3.60334e+07	2.13772e+08	8577.85	8612.48	8672.62
3.59556e+07	3.59203e+07	3.5872e+07	3.58149e+07	3.57541e+07	3.56959e+07	2.11499e+08	8023.71	8016.37	8035.75		3.6633e+07	3.6613e+07	3.65628e+07	3.64898e+07	3.64034e+07	3.63168e+07	2.15439e+08	8631.51	8665.84	8725.92
3.56263e+07	3.55903e+07	3.55423e+07	3.54865e+07	3.54277e+07	3.53714e+07	2.09563e+08	7924.2	7914.22	7930.8		3.68865e+07	3.68661e+07	3.68158e+07	3.67428e+07	3.66565e+07	3.65701e+07	2.16933e+08	8677.53	8711.22	8770.87
3.53038e+07	3.52676e+07	3.52201e+07	3.51653e+07	3.51077e+07	3.50526e+07	2.07667e+08	7838.77	7827.19	7841.98		3.70797e+07	3.70589e+07	3.70084e+07	3.69354e+07	3.68493e+07	3.67632e+07	2.18072e+08	8711.32	8744.34	8803.48
3.50173e+07	3.4981e+07	3.49341e+07	3.48803e+07	3.48239e+07	3.47698e+07	2.05985e+08	7761.29	7748.34	7761.57		3.69573e+07	3.69368e+07	3.68863e+07	3.68133e+07	3.67272e+07	3.66408e+07	2.1735e+08	8690.02	8723.48	8782.96
3.49195e+07	3.48831e+07	3.48364e+07	3.4783e+07	3.47271e+07	3.46735e+07	2.0541e+08	7733.63	7720.16	7732.8		3.67992e+07	3.67789e+07	3.67286e+07	3.66556e+07	3.65693e+07	3.64828e+07	2.16419e+08	8661.93	8695.88	8755.72
3.52631e+07	3.52268e+07	3.51794e+07	3.51247e+07	3.50673e+07	3.50123e+07	2.07428e+08	7828.13	7816.38	7830.96		3.65898e+07	3.657e+07	3.65199e+07	3.6447e+07	3.63605e+07	3.62738e+07	2.15186e+08	8624.4	8659.01	8719.32
3.58023e+07	3.57665e+07	3.57184e+07	3.5662e+07	3.56024e+07	3.55454e+07	2.10598e+08	7972.43	7963.5	7981.22		3.62282e+07	3.62091e+07	3.61594e+07	3.60865e+07	3.59997e+07	3.59121e+07	2.13055e+08	8558.34	8593.96	8654.97
3.64435e+07	3.64092e+07	3.63609e+07	3.6303e+07	3.62408e+07	3.6181e+07	2.14377e+08	8150.54	8145.9	8168.22		3.5807e+07	3.57886e+07	3.57392e+07	3.56659e+07	3.55783e+07	3.549e+07	2.1057e+08	8479.92	8516.61	8578.33
3.71358e+07	3.71044e+07	3.70566e+07	3.69973e+07	3.69323e+07	3.68691e+07	2.18466e+08	8361.29	8363.13	8392.17		3.5345e+07	3.53277e+07	3.52787e+07	3.52054e+07	3.51175e+07	3.50288e+07	2.0785e+08	8395.46	8433.89	8496.97
3.77223e+07	3.76909e+07	3.764e+07	3.7575e+07	3.75026e+07	3.74317e+07	2.21876e+08	8553.45	8556.94	8587.7		3.50992e+07	3.50825e+07	3.50339e+07	3.49607e+07	3.48727e+07	3.47839e+07	2.06403e+08	8350.94	8390.51	8454.51
3.81029e+07	3.80704e+07	3.80171e+07	3.79487e+07	3.78722e+07	3.77969e+07	2.24085e+08	8679.46	8686.69	8721.62		3.49939e+07	3.49774e+07	3.49289e+07	3.48558e+07	3.47678e+07	3.4679e+07	2.05784e+08	8331.46	8371.44	8435.75
3.83232e+07	3.82928e+07	3.82406e+07	3.81724e+07	3.80955e+07	3.80195e+07	2.25399e+08	8755.96	8767.25	8806.34		3.5024e+07	3.50075e+07	3.49589e+07	3.48857e+07	3.47978e+07	3.47089e+07	2.05961e+08	8336.7	8376.47	8440.62
3.84613e+07	3.84342e+07	3.83845e+07	3.83177e+07	3.82414e+07	3.81657e+07	2.26246e+08	8822.01	8838.23	8882.18		3.51027e+07	3.50865e+07	3.50382e+07	3.49653e+07	3.48776e+07	3.47889e+07	2.06429e+08	8354.71	8395	8459.71
3.85669e+07	3.85426e+07	3.84945e+07	3.84287e+07	3.83523e+07	3.82757e+07	2.26891e+08	8878.6	8899.22	8946.94		3.52035e+07	3.51877e+07	3.51399e+07	3.50674e+07	3.498e+07	3.48916e+07	2.0703e+08	8377.41	8418.23	8483.53
3.86515e+07	3.86253e+07	3.85741e+07	3.85041e+07	3.84235e+07	3.83436e+07	2.27345e+08	8914.39	8932.19	8977.32		3.53179e+07	3.53025e+07	3.52551e+07	3.51832e+07	3.50964e+07	3.50085e+07	2.07712e+08	8403.56	8445.01	8511.03
3.86949e+07	3.86672e+07	3.86141e+07	3.85423e+07	3.84599e+07	3.83783e+07	2.27576e+08	8933.78	8952.2	8998.07		3.54111e+07	3.53964e+07	3.53496e+07	3.52783e+07	3.51921e+07	3.51051e+07	2.08272e+08	8428.89	8471.68	8539.07
3.87497e+07	3.87218e+07	3.86682e+07	3.85954e+07	3.8512e+07	3.84293e+07	2.2789e+08	8951.72	8970.87	9017.63		3.55347e+07	3.55206e+07	3.54742e+07	3.54032e+07	3.53172e+07	3.52305e+07	2.09008e+08	8457.61	8501.13	8569.33
3.8778e+07	3.87505e+07	3.86969e+07	3.86239e+07	3.854e+07	3.84567e+07	2.28057e+08	8965.36	8985.7	9033.71		3.57041e+07	3.56898e+07	3.56433e+07	3.55723e+07	3.54864e+07	3.53998e+07	2.10006e+08	8490.29	8533.49	8601.5
3.87237e+07	3.86973e+07	3.86444e+07	3.85716e+07	3.84876e+07	3.84039e+07	2.27745e+08	8967.22	8989.51	9039.39		3.58699e+07	3.58554e+07	3.58088e+07	3.57378e+07	3.5652e+07	3.55654e+07	2.10984e+08	8521.76	8564.56	8632.31
3.86316e+07	3.86066e+07	3.85547e+07	3.84825e+07	3.83986e+07	3.83149e+07	2.27214e+08	8963.27	8987.85	9039.91		3.60193e+07	3.60047e+07	3.59583e+07	3.58874e+07	3.58018e+07	3.57154e+07	2.11867e+08	8551.51	8594.25	8662.05
3.85542e+07	3.85305e+07	3.84796e+07	3.84081e+07	3.83246e+07	3.82412e+07	2.2677e+08	8959.31	8985.75	9039.56		3.61218e+07	3.61075e+07	3.60612e+07	3.59906e+07	3.59052e+07	3.58187e+07	2.12475e+08	8573.31	8616.27	8684.36
3.84731e+07	3.84506e+07	3.84005e+07	3.83294e+07	3.82462e+07	3.81629e+07	2.26303e+08	8953.2	8981.28	9036.61		3.61372e+07	3.61224e+07	3.60759e+07	3.6005e+07	3.59194e+07	3.58331e+07	2.12561e+08	8573.05	8615.38	8682.85
3.84308e+07	3.84088e+07	3.83591e+07	3.82883e+07	3.82052e+07	3.8122e+07	2.26058e+08	8949.78	8978.68	9034.77		3.61309e+07	3.61156e+07	3.60686e+07	3.59974e+07	3.59116e+07	3.58252e+07	2.12518e+08	8568.36	8610.03	8676.86
3.84384e+07	3.84163e+07	3.83665e+07	3.82957e+07	3.82126e+07	3.81293e+07	2.26102e+08	8950.39	8979.15	9035.1		3.6104e+07	3.60882e+07	3.60408e+07	3.59693e+07	3.58833e+07	3.57967e+07	2.12354e+08	8559.43	8600.41	8666.55
3.84774e+07	3.84549e+07	3.84047e+07	3.83336e+07	3.82504e+07	3.81671e+07	2.26328e+08	8953.55	8981.55	9036.81		3.59564e+07	3.59409e+07	3.58937e+07	3.58222e+07	3.57362e+07	3.56495e+07	2.11485e+08	8532.46	8573.95	8640.48
3.85214e+07	3.84982e+07	3.84475e+07	3.83762e+07	3.82927e+07	3.82093e+07	2.26581e+08	8956.62	8983.68	9038.06		3.57694e+07	3.57549e+07	3.57084e+07	3.56373e+07	3.55515e+07	3.54649e+07	2.10391e+08	8502.36	8545.35	8613.19
3.85227e+07	3.84992e+07	3.84482e+07	3.83765e+07	3.82929e+07	3.82093e+07	2.26584e+08	8955.27	8982.06	9036.18		3.55419e+07	3.55282e+07	3.54822e+07	3.54114e+07	3.53257e+07	3.52391e+07	2.09055e+08	8462.31	8506.47	8575.29
3.85208e+07	3.8497e+07	3.84459e+07	3.83741e+07	3.82903e+07	3.82065e+07	2.2657e+08	8954.05	8980.69	9034.67		3.51335e+07	3.51209e+07	3.50755e+07	3.5005e+07	3.49194e+07	3.48328e+07	2.06653e+08	8386.9	8432.6	8502.62
3.84837e+07	3.84603e+07	3.84093e+07	3.83376e+07	3.82537e+07	3.81699e+07	2.26354e+08	8950.16	8977.36	9031.86		3.44319e+07	3.44215e+07	3.43778e+07	3.43084e+07	3.42233e+07	3.41366e+07	2.02534e+08	8258.99	8307.95	8380.63
3.83619e+07	3.83397e+07	3.82895e+07	3.82181e+07	3.81344e+07	3.80506e+07	2.25645e+08	8938.06	8967.22	9023.55		3.36209e+07	3.36134e+07	3.35705e+07	3.35002e+07	3.34129e+07	3.33234e+07	1.97755e+08	8112.48	8163.71	8234.63
3.82791e+07	3.82581e+07	3.82087e+07	3.8138e+07	3.80547e+07	3.79711e+07	2.25169e+08	8930.27	8961.1	9019.03		3.28026e+07	3.27949e+07	3.27517e+07	3.26807e+07	3.25923e+07	3.25017e+07	1.92918e+08	7956.67	8007.7	8080.61
3.82592e+07	3.82383e+07	3.81892e+07	3.81186e+07	3.80353e+07	3.79518e+07	2.25053e+08	8928.52	8959.71	9017.98		3.20606e+07	3.20541e+07	3.20114e+07	3.19404e+07	3.18519e+07	3.17613e+07	1.88547e+08	7810.43	7863.55	7938.02
3.82546e+07	3.82335e+07	3.81842e+07	3.81133e+07	3.80299e+07	3.79464e+07	2.25023e+08	8926.38	8957.33	9015.36		3.14233e+07	3.14174e+07	3.13751e+07	3.13044e+07	3.1216e+07	3.11255e+07	1.84791e+08	7684	7738.84	7814.47
3.82375e+07	3.82165e+07	3.81671e+07	3.80962e+07	3.80127e+07	3.79291e+07	2.24922e+08	8923.76	8954.82	9012.94		3.08475e+07	3.08423e+07	3.08005e+07	3.073e+07	3.06415e+07	3.05508e+07	1.81398e+08	7571.61	7628.05	7704.85
3.82673e+07	3.82468e+07	3.81979e+07	3.81275e+07	3.80442e+07	3.79601e+07	2.25104e+08	8932.74	8964.16	9022.61		3.07073e+07	3.07022e+07	3.06604e+07	3.05899e+07	3.05012e+07	3.04101e+07	1.80571e+08	7546.97	7603.99	7681.29
3.8219e+07	3.81999e+07	3.81518e+07	3.80809e+07	3.79963e+07	3.79109e+07	2.24823e+08	8932.52	8965.45	9020.94		3.07469e+07	3.07417e+07	3.06997e+07	3.0629e+07	3.05403e+07	3.04491e+07	1.80802e+08	7556.08	7613.09	7690.42
3.79566e+07	3.79358e+07	3.7885e+07	3.78111e+07	3.77235e+07	3.76355e+07	2.23238e+08	8897.46	8927.76	8984.47		3.07794e+07	3.07741e+07	3.07319e+07	3.0661e+07	3.05722e+07	3.0481e+07	1.80992e+08	7563.86	7620.88	7698.27
3.77086e+07	3.76876e+07	3.76363e+07	3.75618e+07	3.74736e+07	3.73849e+07	2.21768e+08	8860.71	8892.92	8951.38		3.07464e+07	3.0741e+07	3.06985e+07	3.06273e+07	3.05381e+07	3.04468e+07	1.80794e+08	7559.79	7617.07	7694.72
3.76964e+07	3.76756e+07	3.76243e+07	3.75498e+07	3.74616e+07	3.73728e+07	2.21697e+08	8858.94	8891.22	8949.75		3.07016e+07	3.06963e+07	3.06538e+07	3.05824e+07	3.04931e+07	3.04017e+07	1.80529e+08	7551.76	7609.21	7687.01
3.76917e+07	3.76711e+07	3.76198e+07	3.75453e+07	3.7457e+07	3.73682e+07	2.2167e+08	8858.28	8890.58	8949.1		3.06726e+07	3.06673e+07	3.06248e+07	3.05534e+07	3.0464e+07	3.03725e+07	1.80358e+08	7546.39	7603.94	7681.81
3.76779e+07	3.76575e+07	3.76064e+07	3.75319e+07	3.74435e+07	3.73546e+07	2.2159e+08	8856.23	8888.61	8947.18		3.0634e+07	3.06287e+07	3.05861e+07	3.05145e+07	3.04247e+07	3.03329e+07	1.80128e+08	7540.45	7598.22	7676.3
3.76704e+07	3.76503e+07	3.75994e+07	3.75249e+07	3.74366e+07	3.73476e+07	2.21548e+08	8855.12	8887.52	8946.08		3.0774e+07	3.07684e+07	3.07254e+07	3.06534e+07	3.05631e+07	3.04708e+07	1.80948e+08	7570.96	7628.57	7706.65
3.76794e+07	3.76594e+07	3.76086e+07	3.75342e+07	3.74458e+07	3.7357e+07	2.21602e+08	8856.48	8888.8	8947.29		3.09617e+07	3.09558e+07	3.09125e+07	3.08401e+07	3.07495e+07	3.06567e+07	1.82051e+08	7610.77	7668.08	7746.04
3.78458e+07	3.7826e+07	3.77757e+07	3.77022e+07	3.76148e+07	3.75266e+07	2.22593e+08	8881.54	8912.62	8969.98		3.10823e+07	3.10762e+07	3.10328e+07	3.09603e+07	3.08695e+07	3.07766e+07	1.82761e+08	7636.3	7693.4	7771.27
3.814e+07	3.81207e+07	3.80712e+07	3.7999e+07	3.79133e+07	3.78268e+07	2.24344e+08	8922.2	8952.63	9007.94		3.11552e+07	3.1149e+07	3.11056e+07	3.1033e+07	3.09422e+07	3.08492e+07	1.8319e+08	7651.55	7708.5	7786.3
3.83615e+07	3.83405e+07	3.82914e+07	3.82211e+07	3.81383e+07	3.80552e+07	2.25659e+08	8943.62	8973.78	9031.04		3.12441e+07	3.12377e+07	3.11941e+07	3.11215e+07	3.10307e+07	3.09377e+07	1.83713e+08	7669.14	7725.87	7803.51
3.84865e+07	3.84638e+07	3.84135e+07	3.83425e+07	3.82592e+07	3.81759e+07	2.2638e+08	8954.28	8982.11	9037.21		3.12776e+07	3.12712e+07	3.12276e+07	3.11549e+07	3.10641e+07	3.09711e+07	1.8391e+08	7675.62	7732.26	7809.83
3.85471e+07	3.85236e+07	3.84728e+07	3.84014e+07	3.83181e+07	3.82348e+07	2.26731e+08	8958.78	8985.43	9039.43		3.1217e+07	3.12107e+07	3.11671e+07	3.10944e+07	3.10037e+07	3.09108e+07	1.83554e+08	7662.22	7718.95	7796.54
3.85569e+07	3.85332e+07	3.84821e+07	3.84106e+07	3.83272e+07	3.82438e+07	2.26786e+08	8957.26	8983.46	9037.01		3.10851e+07	3.10789e+07	3.10355e+07	3.0963e+07	3.08724e+07	3.07797e+07	1.82777e+08	7634.67	7691.65	7769.36
3.84854e+07	3.84619e+07	3.8411e+07	3.83395e+07	3.8256e+07	3.81726e+07	2.26365e+08	8945.6	8972.39	9026.47		3.09171e+07	3.09112e+07	3.0868e+07	3.07958e+07	3.07053e+07	3.06128e+07	1.81789e+08	7600.23	7657.55	7735.46
3.67474e+07	3.67258e+07	3.66769e+07	3.66075e+07	3.65261e+07	3.64446e+07	2.16137e+08	8570.31	8597.31	8649.94		3.08249e+07	3.08192e+07	3.07762e+07	3.0704e+07	3.06137e+07	3.05213e+07	1.81248e+08	7581.41	7638.92	7716.94
											3.10252e+07	3.10192e+07	3.09759e+07	3.09036e+07	3.08133e+07	3.07209e+07	1.82427e+08	7620.98	7677.99	7755.66
											3.13993e+07	3.13926e+07	3.13488e+07	3.12762e+07	3.11856e+07	3.10931e+07	1.84628e+08	7695.53	7751.63	7828.7
											3.17281e+07	3.17208e+07	3.16765e+07	3.16035e+07	3.15126e+07	3.14198e+07	1.86561e+08	7762.07	7817.44	7894.06
											3.20246e+07	3.20168e+07	3.19721e+07	3.18989e+07	3.18078e+07	3.17148e+07	1.88306e+08	7821.56	7876.23	7952.39
											3.25261e+07	3.25173e+07	3.24721e+07	3.23985e+07	3.23075e+07	3.22146e+07	1.91258e+08	7917.64	7970.81	8045.85
											3.30147e+07	3.30049e+07	3.2959e+07	3.28852e+07	3.27941e+07	3.27013e+07	1.94133e+08	8011.83	8063.55	8137.53
											3.34772e+07	3.34665e+07	3.342e+07	3.33459e+07	3.32547e+07	3.3162e+07	1.96855e+08	8100.96	8151.29	8224.26
											3.36757e+07	3.36645e+07	3.36178e+07	3.35436e+07	3.34525e+07	3.33597e+07	1.98023e+08	8138.74	8188.44	8260.93
											3.37344e+07	3.37231e+07	3.36764e+07	3.36021e+07	3.3511e+07	3.34183e+07	1.98369e+08	8149.87	8199.38	8271.72
											3.38374e+07	3.38259e+07	3.3779e+07	3.37047e+07	3.36136e+07	3.35209e+07	1.98975e+08	8169.61	8218.8	8290.91
											3.39944e+07	3.39827e+07	3.39356e+07	3.38611e+07	3.37699e+07	3.36771e+07	1.99899e+08	8200.38	8249.11	8320.92
											3.41129e+07	3.41009e+07	3.40537e+07	3.39793e+07	3.3888e+07	3.37952e+07	2.00597e+08	8224.71	8273.16	8344.81
											3.42531e+07	3.42409e+07	3.41937e+07	3.41193e+07	3.40282e+07	3.39355e+07	2.01424e+08	8252.92	8300.94	8372.33
											3.44121e+07	3.43995e+07	3.43519e+07	3.42775e+07	3.41866e+07	3.40941e+07	2.02359e+08	8283.69	8331.15	8402.15
											3.43964e+07	3.43837e+07	3.43361e+07	3.42616e+07	3.41707e+07	3.40783e+07	2.02266e+08	8281.23	8328.73	8399.78
											3.44455e+07	3.44327e+07	3.4385e+07	3.43105e+07	3.42196e+07	3.41273e+07	2.02555e+08	8290.34	8337.67	8408.59
											3.45662e+07	3.45532e+07	3.45054e+07	3.44309e+07	3.434e+07	3.42477e+07	2.03266e+08	8312.71	8359.6	8430.18
											3.55305e+07	3.55168e+07	3.54708e+07	3.54e+07	3.53142e+07	3.52276e+07	2.08987e+08	8460.15	8504.35	8573.19
											3.72084e+07	3.71859e+07	3.71342e+07	3.70609e+07	3.6975e+07	3.68889e+07	2.18818e+08	8713.83	8742.02	8796.56
											3.69351e+07	3.69131e+07	3.68619e+07	3.67885e+07	3.67023e+07	3.66156e+07	2.17208e+08	8672.74	8703.34	8760
											3.51329e+07	3.51186e+07	3.50701e+07	3.49953e+07	3.49045e+07	3.48125e+07	2.06601e+08	8410.79	8455.3	8523.8
											3.66681e+07	3.66475e+07	3.65969e+07	3.65238e+07	3.64374e+07	3.63505e+07	2.15641e+08	8633.11	8666.3	8725.3
											3.88449e+07	3.88164e+07	3.87628e+07	3.86906e+07	3.8608e+07	3.85261e+07	2.28453e+08	8954.57	8972.15	9017.51
											3.6726e+07	3.67042e+07	3.66525e+07	3.65784e+07	3.64913e+07	3.64041e+07	2.15968e+08	8644.98	8677.19	8735.62
											3.55145e+07	3.5497e+07	3.54458e+07	3.53688e+07	3.52765e+07	3.51835e+07	2.08817e+08	8475.82	8516.13	8581.41
											3.72633e+07	3.72402e+07	3.71879e+07	3.71138e+07	3.70272e+07	3.69408e+07	2.19133e+08	8735.39	8765.12	8821.41
											3.7547e+07	3.75232e+07	3.74707e+07	3.73968e+07	3.73105e+07	3.72246e+07	2.20804e+08	8781.64	8810.06	8865.24
											3.63803e+07	3.63659e+07	3.63202e+07	3.62506e+07	3.61667e+07	3.60822e+07	2.1401e+08	8615.11	8657.96	8726.31
											3.60658e+07	3.60497e+07	3.59999e+07	3.59241e+07	3.58328e+07	3.57405e+07	2.12089e+08	8578.25	8616.74	8679.78
											3.62481e+07	3.62358e+07	3.61917e+07	3.61229e+07	3.60374e+07	3.595e+07	2.13243e+08	8600.99	8646.36	8714.3
											3.64033e+07	3.63868e+07	3.63393e+07	3.62683e+07	3.61834e+07	3.60981e+07	2.14121e+08	8608.36	8648.65	8714.63
											3.65268e+07	3.65065e+07	3.64559e+07	3.63826e+07	3.6296e+07	3.62093e+07	2.14808e+08	8615.16	8650.31	8711.51
											3.67929e+07	3.67711e+07	3.67194e+07	3.66454e+07	3.65583e+07	3.64714e+07	2.16364e+08	8657.18	8689.41	8747.9
											3.70737e+07	3.70509e+07	3.69987e+07	3.69245e+07	3.68376e+07	3.67509e+07	2.18014e+08	8702.61	8732.71	8789.22
											3.735e+07	3.73264e+07	3.72739e+07	3.71998e+07	3.71132e+07	3.70269e+07	2.19641e+08	8747.37	8775.92	8831.06
											3.73332e+07	3.731e+07	3.72578e+07	3.71838e+07	3.70973e+07	3.7011e+07	2.19545e+08	8747.85	8777.59	8833.94
											3.72295e+07	3.72077e+07	3.71564e+07	3.7083e+07	3.69968e+07	3.69107e+07	2.18946e+08	8736.5	8768.64	8827.29
											3.72122e+07	3.71918e+07	3.71416e+07	3.70691e+07	3.69835e+07	3.68978e+07	2.1886e+08	8740.26	8774.37	8834.89
											3.72698e+07	3.72506e+07	3.72016e+07	3.713e+07	3.7045e+07	3.69599e+07	2.19215e+08	8757.18	8792.73	8854.62
											3.71605e+07	3.71444e+07	3.70979e+07	3.70282e+07	3.69439e+07	3.68578e+07	2.18601e+08	8754.51	8793.85	8859.27
											3.7045e+07	3.70273e+07	3.69778e+07	3.69037e+07	3.68147e+07	3.67247e+07	2.17873e+08	8746.58	8781.65	8842.02
											3.69499e+07	3.69303e+07	3.68791e+07	3.68037e+07	3.67139e+07	3.66235e+07	2.1729e+08	8729.66	8764.9	8825.89
											3.78348e+07	3.78162e+07	3.77684e+07	3.76982e+07	3.76137e+07	3.75283e+07	2.22562e+08	8861.1	8895.6	8955.04
											3.77952e+07	3.77756e+07	3.77269e+07	3.76563e+07	3.75726e+07	3.74886e+07	2.22321e+08	8848.26	8881.63	8941.65
											3.67347e+07	3.67172e+07	3.66675e+07	3.6593e+07	3.65036e+07	3.64134e+07	2.1604e+08	8693.56	8730.56	8792.85
											3.64457e+07	3.64283e+07	3.63783e+07	3.63034e+07	3.62136e+07	3.61228e+07	2.14331e+08	8644.99	8683.65	8747.42
											3.63809e+07	3.63647e+07	3.63157e+07	3.62415e+07	3.61521e+07	3.60616e+07	2.13961e+08	8632.16	8670.83	8734.44
											3.62942e+07	3.62803e+07	3.62331e+07	3.61605e+07	3.60725e+07	3.59831e+07	2.13477e+08	8613.58	8654.81	8718.43
											3.62513e+07	3.62366e+07	3.61902e+07	3.61195e+07	3.60342e+07	3.59477e+07	2.13236e+08	8596.41	8638.83	8706.48
											3.63931e+07	3.63767e+07	3.63291e+07	3.62575e+07	3.61717e+07	3.60853e+07	2.14057e+08	8612.03	8652.02	8717.42
											3.68482e+07	3.68316e+07	3.67841e+07	3.67131e+07	3.6628e+07	3.65423e+07	2.16746e+08	8697.41	8736.53	8801.42
											3.72465e+07	3.72301e+07	3.7183e+07	3.71115e+07	3.70251e+07	3.69375e+07	2.19093e+08	8772.26	8810.82	8871.19
											3.74108e+07	3.73917e+07	3.73416e+07	3.72678e+07	3.71796e+07	3.70908e+07	2.20026e+08	8804.16	8837.21	8896.17
											3.75354e+07	3.75159e+07	3.74656e+07	3.73918e+07	3.7304e+07	3.72154e+07	2.2076e+08	8823.49	8855.74	8914.01
											3.79936e+07	3.79737e+07	3.79241e+07	3.7852e+07	3.77663e+07	3.76799e+07	2.23477e+08	8890.83	8919.9	8975.29
											3.79586e+07	3.79394e+07	3.78914e+07	3.7821e+07	3.77366e+07	3.76514e+07	2.23288e+08	8879.23	8912.72	8970.77
											3.69582e+07	3.69406e+07	3.68908e+07	3.68164e+07	3.6727e+07	3.66367e+07	2.17358e+08	8732.27	8767.65	8828.28
											3.67193e+07	3.67011e+07	3.66502e+07	3.65746e+07	3.64842e+07	3.6393e+07	2.15935e+08	8691.68	8727.77	8789.14
											3.658e+07	3.65623e+07	3.65117e+07	3.6436e+07	3.63454e+07	3.62539e+07	2.15115e+08	8667.99	8704.63	8766.39
											3.63271e+07	3.63093e+07	3.62583e+07	3.61821e+07	3.60909e+07	3.59988e+07	2.13617e+08	8623.56	8661.04	8723.62
											3.59667e+07	3.59486e+07	3.58973e+07	3.58207e+07	3.57289e+07	3.56364e+07	2.11485e+08	8558.27	8597.19	8661.32
											3.55464e+07	3.55296e+07	3.54793e+07	3.54032e+07	3.53116e+07	3.52191e+07	2.09016e+08	8483.39	8525.04	8591.49
											3.52305e+07	3.52133e+07	3.51622e+07	3.50851e+07	3.49925e+07	3.48993e+07	2.07141e+08	8423.1	8464.22	8530.22
											3.8202e+07	3.81776e+07	3.81268e+07	3.80561e+07	3.79741e+07	3.78925e+07	2.24696e+08	8853.7	8874.77	8922.68
											3.74276e+07	3.74068e+07	3.73593e+07	3.72915e+07	3.72118e+07	3.71319e+07	2.20171e+08	8709.88	8738.32	8793.27
											3.31288e+07	3.31189e+07	3.30729e+07	3.29989e+07	3.29076e+07	3.28145e+07	1.94804e+08	8036.45	8088	8161.94
											3.22593e+07	3.22506e+07	3.22052e+07	3.21315e+07	3.20402e+07	3.19471e+07	1.89682e+08	7874.52	7928.5	8004.44
											3.16991e+07	3.16915e+07	3.16468e+07	3.15736e+07	3.14825e+07	3.13894e+07	1.86386e+08	7764.91	7820.44	7897.48
											3.12878e+07	3.1281e+07	3.1237e+07	3.11641e+07	3.10732e+07	3.09802e+07	1.83966e+08	7683.58	7740.23	7818.02
											3.08945e+07	3.08885e+07	3.0845e+07	3.07725e+07	3.06817e+07	3.05889e+07	1.81653e+08	7605.41	7663.05	7741.5
											3.07003e+07	3.06946e+07	3.06513e+07	3.05789e+07	3.04883e+07	3.03954e+07	1.80509e+08	7566.78	7624.87	7703.63
											3.05426e+07	3.05372e+07	3.04941e+07	3.04219e+07	3.03313e+07	3.02385e+07	1.79581e+08	7535.31	7593.77	7672.78
											3.03998e+07	3.03947e+07	3.0352e+07	3.02799e+07	3.01894e+07	3.00967e+07	1.78742e+08	7506.3	7565.12	7644.34
											3.00622e+07	3.00577e+07	3.00154e+07	2.99437e+07	2.98535e+07	2.9761e+07	1.76756e+08	7438.04	7497.63	7577.34
											2.96712e+07	2.96674e+07	2.96257e+07	2.95544e+07	2.94645e+07	2.93722e+07	1.74456e+08	7358.73	7419.18	7499.42
											2.9224e+07	2.9221e+07	2.91799e+07	2.91091e+07	2.90195e+07	2.89274e+07	1.71826e+08	7267.46	7328.83	7409.63
											2.8707e+07	2.87049e+07	2.86647e+07	2.85944e+07	2.85051e+07	2.8413e+07	1.68784e+08	7160.68	7223.06	7304.41
											2.81164e+07	2.81153e+07	2.80757e+07	2.80059e+07	2.7917e+07	2.78253e+07	1.65309e+08	7038.03	7101.47	7183.38
											2.74525e+07	2.74524e+07	2.74136e+07	2.73446e+07	2.72563e+07	2.71654e+07	1.61403e+08	6899.49	6964.03	7046.5
											2.68324e+07	2.68333e+07	2.67955e+07	2.67275e+07	2.66403e+07	2.65503e+07	1.57758e+08	6768.5	6833.95	6916.81
											2.64737e+07	2.64754e+07	2.64386e+07	2.63715e+07	2.62849e+07	2.61955e+07	1.55653e+08	6690.34	6756.15	6839.05
											2.60654e+07	2.60678e+07	2.60315e+07	2.5965e+07	2.58792e+07	2.57906e+07	1.53253e+08	6602.95	6669.27	6752.34
											2.55979e+07	2.56009e+07	2.55653e+07	2.54995e+07	2.54143e+07	2.53263e+07	1.50503e+08	6504.99	6572	6655.4
											2.60693e+07	2.60718e+07	2.6036e+07	2.59704e+07	2.58857e+07	2.57984e+07	1.53284e+08	6598.41	6664.4	6747.07
											2.65296e+07	2.65315e+07	2.64954e+07	2.64295e+07	2.63448e+07	2.62575e+07	1.55996e+08	6691.54	6756.63	6838.74
											2.68441e+07	2.68454e+07	2.68087e+07	2.67422e+07	2.66569e+07	2.6569e+07	1.57843e+08	6757.68	6822.3	6904.18
											2.7146e+07	2.71468e+07	2.71098e+07	2.7043e+07	2.69575e+07	2.68694e+07	1.5962e+08	6819.33	6883.38	6964.92
											2.76282e+07	2.76285e+07	2.75915e+07	2.75252e+07	2.74405e+07	2.73534e+07	1.62467e+08	6911.9	6974.66	7055.24
											2.8077e+07	2.80768e+07	2.80395e+07	2.79734e+07	2.7889e+07	2.78023e+07	1.65114e+08	6999.9	7061.56	7141.36
											2.84546e+07	2.84537e+07	2.8416e+07	2.83495e+07	2.82648e+07	2.81778e+07	1.67336e+08	7076.39	7137.27	7216.56
											2.8777e+07	2.87757e+07	2.87377e+07	2.86708e+07	2.85859e+07	2.84988e+07	1.69234e+08	7141.41	7201.58	7280.42
											2.90482e+07	2.90473e+07	2.90096e+07	2.89432e+07	2.88587e+07	2.87721e+07	1.7084e+08	7193.52	7252.94	7331.19
											2.92777e+07	2.92775e+07	2.92408e+07	2.91755e+07	2.90922e+07	2.90065e+07	1.72209e+08	7236.63	7295.26	7372.8
											2.95257e+07	2.9525e+07	2.94889e+07	2.94254e+07	2.93443e+07	2.92599e+07	1.73683e+08	7276.74	7337.65	7418.56
											2.97806e+07	2.97776e+07	2.97395e+07	2.96744e+07	2.95924e+07	2.95083e+07	1.75162e+08	7317.66	7375.32	7453.14
											3.00139e+07	3.00092e+07	2.99697e+07	2.99034e+07	2.98201e+07	2.97348e+07	1.76518e+08	7355.29	7409.96	7484.96
											3.00162e+07	3.00122e+07	2.99734e+07	2.99071e+07	2.98235e+07	2.97378e+07	1.76537e+08	7349.18	7401.94	7475.01
											2.98679e+07	2.98667e+07	2.98313e+07	2.97676e+07	2.96861e+07	2.9602e+07	1.75702e+08	7307.61	7365.6	7437.64
											2.96092e+07	2.96058e+07	2.9569e+07	2.95062e+07	2.9427e+07	2.9346e+07	1.74169e+08	7237.66	7292.99	7368.39
											2.91106e+07	2.91059e+07	2.9068e+07	2.90045e+07	2.89249e+07	2.88438e+07	1.71213e+08	7120.75	7173.98	7246.99
											2.83225e+07	2.83182e+07	2.82809e+07	2.8218e+07	2.81394e+07	2.80594e+07	1.6657e+08	6950.83	7003.72	7075.85
											2.77839e+07	2.77814e+07	2.77457e+07	2.7684e+07	2.7606e+07	2.75258e+07	1.63411e+08	6830.93	6882.13	6952.25
											2.75618e+07	2.75598e+07	2.75246e+07	2.74633e+07	2.73855e+07	2.73056e+07	1.62107e+08	6785.02	6836.69	6907.11
											2.74819e+07	2.74798e+07	2.74448e+07	2.73841e+07	2.73074e+07	2.72288e+07	1.61641e+08	6780.31	6835.73	6909.75
											2.75847e+07	2.75845e+07	2.75509e+07	2.74913e+07	2.74154e+07	2.73377e+07	1.62268e+08	6814.85	6873.17	6950.1
											2.78292e+07	2.78301e+07	2.77972e+07	2.77381e+07	2.76624e+07	2.75841e+07	1.6372e+08	6875.42	6935.36	7014.06
											2.77205e+07	2.77233e+07	2.76903e+07	2.76294e+07	2.75509e+07	2.74699e+07	1.63074e+08	6865.83	6926	7000.36
											2.76017e+07	2.76036e+07	2.757e+07	2.75087e+07	2.743e+07	2.73488e+07	1.62365e+08	6845.26	6902.46	6977.45
											2.75429e+07	2.75458e+07	2.75144e+07	2.74546e+07	2.7377e+07	2.72968e+07	1.62039e+08	6825.12	6887.59	6962.28
											2.7513e+07	2.75145e+07	2.74823e+07	2.74237e+07	2.73487e+07	2.72711e+07	1.61864e+08	6809.15	6869.63	6948.64
											2.74674e+07	2.74688e+07	2.74366e+07	2.73781e+07	2.73032e+07	2.72258e+07	1.61595e+08	6798.94	6859.36	6938.29
											2.75512e+07	2.75509e+07	2.75172e+07	2.74576e+07	2.73817e+07	2.7304e+07	1.62069e+08	6806.77	6864.9	6941.63
											2.77875e+07	2.77845e+07	2.77484e+07	2.76867e+07	2.76093e+07	2.75301e+07	1.63431e+08	6841.09	6895.24	6968.24
											2.73398e+07	2.73378e+07	2.73025e+07	2.72415e+07	2.71644e+07	2.70853e+07	1.60799e+08	6744.34	6798.29	6870.78
											2.6655e+07	2.66548e+07	2.66211e+07	2.65612e+07	2.64846e+07	2.6406e+07	1.56777e+08	6597.43	6651.34	6723.3
											2.58813e+07	2.58849e+07	2.58564e+07	2.58013e+07	2.57285e+07	2.56528e+07	1.52275e+08	6419.67	6479.42	6551.88
											2.48729e+07	2.48731e+07	2.4842e+07	2.47868e+07	2.47164e+07	2.46444e+07	1.46304e+08	6174.65	6229.07	6300.26
											2.34597e+07	2.34657e+07	2.34401e+07	2.33888e+07	2.33213e+07	2.32511e+07	1.38033e+08	5851.77	5908.76	5974.2
											2.20744e+07	2.20757e+07	2.20481e+07	2.19981e+07	2.1934e+07	2.18682e+07	1.29841e+08	5514.66	5566.06	5632.32
											2.10267e+07	2.10331e+07	2.10122e+07	2.09692e+07	2.091e+07	2.08474e+07	1.23742e+08	5263.49	5317.6	5383.03
											2.04091e+07	2.04107e+07	2.03858e+07	2.03399e+07	2.02808e+07	2.022e+07	1.20051e+08	5095.2	5143.11	5204.68
											2.00363e+07	2.0036e+07	2.0009e+07	1.99616e+07	1.99015e+07	1.98399e+07	1.17826e+08	4998.93	5042.81	5100.3
											1.97966e+07	1.97984e+07	1.97735e+07	1.97276e+07	1.96684e+07	1.96073e+07	1.16437e+08	4942.61	4983.76	5038.49
											1.99388e+07	1.99412e+07	1.99166e+07	1.9871e+07	1.9812e+07	1.97509e+07	1.17281e+08	4972.01	5012.29	5066.29
											2.03232e+07	2.03241e+07	2.02981e+07	2.02512e+07	2.0191e+07	2.01288e+07	1.1953e+08	5052.11	5092.1	5146.08
											2.11258e+07	2.11234e+07	2.10943e+07	2.10445e+07	2.09822e+07	2.09185e+07	1.24224e+08	5222.28	5263.07	5318.34
											2.20625e+07	2.206e+07	2.20312e+07	2.1982e+07	2.19199e+07	2.18561e+07	1.29756e+08	5431.07	5474.13	5532.19
											2.31653e+07	2.31641e+07	2.31361e+07	2.30872e+07	2.30254e+07	2.29622e+07	1.36276e+08	5684.96	5730.98	5792.6
											2.44841e+07	2.44829e+07	2.44518e+07	2.43979e+07	2.43296e+07	2.42594e+07	1.44013e+08	5994.12	6036.42	6093.02
											2.57563e+07	2.57494e+07	2.57144e+07	2.56574e+07	2.55867e+07	2.55146e+07	1.51462e+08	6270.25	6313.01	6373.47
											2.67154e+07	2.67109e+07	2.66776e+07	2.66219e+07	2.65526e+07	2.64818e+07	1.57149e+08	6494.75	6541.25	6605.93
											2.77194e+07	2.77169e+07	2.76833e+07	2.76245e+07	2.75503e+07	2.74741e+07	1.63059e+08	6732.83	6781.39	6841.21
											2.85773e+07	2.8568e+07	2.85282e+07	2.8465e+07	2.83875e+07	2.83087e+07	1.68042e+08	6922.13	6965.56	7028.72
											2.91204e+07	2.91132e+07	2.90753e+07	2.90136e+07	2.89371e+07	2.88591e+07	1.71273e+08	7051.26	7097.84	7164.38
											2.9503e+07	2.94975e+07	2.94612e+07	2.94009e+07	2.93258e+07	2.92489e+07	1.73553e+08	7148.67	7198.04	7267.53
											2.97212e+07	2.97175e+07	2.96822e+07	2.9622e+07	2.95446e+07	2.94649e+07	1.74847e+08	7210.63	7262.45	7331.2
											2.99967e+07	2.99926e+07	2.99548e+07	2.9891e+07	2.98114e+07	2.97298e+07	1.76444e+08	7274	7322.45	7387.02
											3.03009e+07	3.02949e+07	3.02556e+07	3.01908e+07	3.01102e+07	3.00279e+07	1.78219e+08	7338.09	7382.89	7447.27
											3.05481e+07	3.05411e+07	3.05011e+07	3.04357e+07	3.03546e+07	3.02718e+07	1.79667e+08	7388.8	7431.71	7495.79
											3.07714e+07	3.07632e+07	3.07224e+07	3.06562e+07	3.05745e+07	3.04911e+07	1.80972e+08	7433.45	7476.11	7540.1
											3.12104e+07	3.11993e+07	3.1156e+07	3.1088e+07	3.10049e+07	3.09206e+07	1.8353e+08	7528.89	7573.64	7639.95
											3.18245e+07	3.1814e+07	3.17713e+07	3.17038e+07	3.16211e+07	3.1537e+07	1.87162e+08	7662.1	7707.97	7775.79
											3.2577e+07	3.25665e+07	3.25243e+07	3.24576e+07	3.23755e+07	3.22921e+07	1.91609e+08	7821.43	7867.5	7936.02
											3.33406e+07	3.33309e+07	3.32892e+07	3.32227e+07	3.31412e+07	3.30584e+07	1.96124e+08	7990.6	8038.04	8108.42
											3.40841e+07	3.40707e+07	3.40241e+07	3.39519e+07	3.38641e+07	3.37752e+07	2.0044e+08	8154.51	8195.96	8261
											3.4787e+07	3.47716e+07	3.47239e+07	3.46513e+07	3.45635e+07	3.44748e+07	2.04573e+08	8297.1	8338.83	8404.7
											3.55162e+07	3.55005e+07	3.54529e+07	3.53811e+07	3.52946e+07	3.5207e+07	2.08882e+08	8441.9	8482.99	8548.8
											3.61323e+07	3.61155e+07	3.60673e+07	3.59952e+07	3.59089e+07	3.58222e+07	2.1251e+08	8557.28	8596.69	8661.34
											3.65005e+07	3.64831e+07	3.64347e+07	3.63627e+07	3.62767e+07	3.61902e+07	2.14681e+08	8625.52	8663.98	8727.97
											3.67074e+07	3.669e+07	3.66417e+07	3.657e+07	3.64843e+07	3.63981e+07	2.15904e+08	8665.29	8703.56	8767.52
											3.67785e+07	3.67613e+07	3.67133e+07	3.66418e+07	3.65563e+07	3.64702e+07	2.16327e+08	8680.28	8718.74	8782.95
											3.68978e+07	3.68804e+07	3.68324e+07	3.67611e+07	3.66758e+07	3.659e+07	2.17031e+08	8702.06	8740.22	8804.22
											3.70891e+07	3.70713e+07	3.70232e+07	3.69519e+07	3.68668e+07	3.67813e+07	2.18159e+08	8734.88	8772.2	8835.51
											3.73926e+07	3.73736e+07	3.73248e+07	3.72533e+07	3.71685e+07	3.70833e+07	2.19942e+08	8781.47	8816.54	8877.91
											3.76195e+07	3.75998e+07	3.75508e+07	3.74795e+07	3.73951e+07	3.73104e+07	2.21279e+08	8817.36	8851.1	8911.34
											3.77546e+07	3.77345e+07	3.76852e+07	3.76141e+07	3.75299e+07	3.74455e+07	2.22074e+08	8837.64	8870.44	8929.88
											3.78525e+07	3.78316e+07	3.77821e+07	3.77108e+07	3.76268e+07	3.75426e+07	2.22647e+08	8850.21	8881.98	8940.5
											3.79496e+07	3.7928e+07	3.7878e+07	3.78066e+07	3.77226e+07	3.76385e+07	2.23215e+08	8861.35	8891.87	8949.25
											3.80603e+07	3.80378e+07	3.79873e+07	3.79157e+07	3.78318e+07	3.77479e+07	2.23861e+08	8873.58	8902.65	8958.69
											3.82335e+07	3.82107e+07	3.81604e+07	3.80892e+07	3.8006e+07	3.79229e+07	2.24886e+08	8898.82	8926.89	8982.1
											3.83185e+07	3.82954e+07	3.82449e+07	3.81737e+07	3.80905e+07	3.80073e+07	2.25386e+08	8912.22	8939.54	8994
											3.83639e+07	3.83406e+07	3.829e+07	3.82187e+07	3.81354e+07	3.80523e+07	2.25652e+08	8918.77	8945.6	8999.64
											3.83672e+07	3.83439e+07	3.82932e+07	3.82219e+07	3.81387e+07	3.80555e+07	2.25671e+08	8919.23	8946.03	9000.03
											3.82232e+07	3.82012e+07	3.81514e+07	3.80807e+07	3.79976e+07	3.79145e+07	2.24833e+08	8902.75	8931.64	8987.57
											3.81162e+07	3.80945e+07	3.80449e+07	3.7974e+07	3.78907e+07	3.78074e+07	2.24203e+08	8887.99	8917.89	8974.79
											3.80672e+07	3.80457e+07	3.7996e+07	3.7925e+07	3.78415e+07	3.7758e+07	2.23913e+08	8880.68	8910.86	8967.98
											3.80466e+07	3.80252e+07	3.79757e+07	3.79048e+07	3.78213e+07	3.77378e+07	2.23793e+08	8878.99	8909.54	8967.01
											3.79889e+07	3.79681e+07	3.79188e+07	3.7848e+07	3.77645e+07	3.76809e+07	2.23456e+08	8872.69	8904	8962.17
											3.79031e+07	3.78827e+07	3.78335e+07	3.77626e+07	3.76789e+07	3.75951e+07	2.22952e+08	8860.93	8892.97	8951.77
											3.78009e+07	3.77807e+07	3.77316e+07	3.76606e+07	3.75767e+07	3.74925e+07	2.22349e+08	8845.78	8878.51	8937.9
											3.77827e+07	3.77628e+07	3.77138e+07	3.76428e+07	3.75589e+07	3.74747e+07	2.22243e+08	8843.83	8876.81	8936.44
											3.77819e+07	3.7762e+07	3.77131e+07	3.76422e+07	3.75583e+07	3.74741e+07	2.22239e+08	8844.05	8877.11	8936.81
											3.7791e+07	3.7771e+07	3.77219e+07	3.76509e+07	3.7567e+07	3.74828e+07	2.22291e+08	8844.63	8877.49	8936.99
											3.78804e+07	3.78596e+07	3.78101e+07	3.77389e+07	3.7655e+07	3.75709e+07	2.22813e+08	8854.85	8886.53	8944.97
											3.79854e+07	3.79642e+07	3.79146e+07	3.78435e+07	3.77598e+07	3.7676e+07	2.23431e+08	8869.52	8900.35	8958.06
											3.80593e+07	3.80377e+07	3.79879e+07	3.79168e+07	3.78332e+07	3.77496e+07	2.23865e+08	8878.87	8908.96	8966.01
											3.80921e+07	3.80702e+07	3.80203e+07	3.79491e+07	3.78656e+07	3.77821e+07	2.24057e+08	8882.41	8912.07	8968.71
											3.80982e+07	3.8076e+07	3.80257e+07	3.79543e+07	3.78707e+07	3.7787e+07	2.24089e+08	8880.94	8910.12	8966.31
											3.81414e+07	3.81193e+07	3.80693e+07	3.79983e+07	3.79149e+07	3.78316e+07	2.24347e+08	8889.12	8918.4	8974.71
											3.81605e+07	3.81389e+07	3.80893e+07	3.80186e+07	3.79355e+07	3.78524e+07	2.24466e+08	8894.57	8924.24	8980.94
											3.81186e+07	3.80976e+07	3.80484e+07	3.79779e+07	3.7895e+07	3.7812e+07	2.24224e+08	8892.01	8922.58	8980.12
											3.80724e+07	3.8052e+07	3.80032e+07	3.79329e+07	3.785e+07	3.7767e+07	2.23957e+08	8888.24	8919.63	8977.94
											3.79937e+07	3.79739e+07	3.79254e+07	3.78553e+07	3.77724e+07	3.7689e+07	2.23496e+08	8879.45	8911.84	8971.04
											3.80435e+07	3.80238e+07	3.79755e+07	3.79056e+07	3.78229e+07	3.7739e+07	2.23792e+08	8887.79	8920.05	8979.17
											3.81122e+07	3.80921e+07	3.80436e+07	3.79736e+07	3.7891e+07	3.78078e+07	2.24195e+08	8896.81	8928.21	8986.46
											3.82197e+07	3.81983e+07	3.8149e+07	3.80785e+07	3.79956e+07	3.79125e+07	2.24818e+08	8907.78	8937.43	8994.09
											3.82273e+07	3.8206e+07	3.81569e+07	3.80866e+07	3.80038e+07	3.79209e+07	2.24865e+08	8910.75	8940.54	8997.35
											3.81741e+07	3.81537e+07	3.81052e+07	3.80354e+07	3.79529e+07	3.78701e+07	2.24561e+08	8907.57	8938.51	8996.39
											3.80884e+07	3.80692e+07	3.80214e+07	3.79511e+07	3.7867e+07	3.77821e+07	2.24056e+08	8900.85	8933.45	8989.68
											3.80164e+07	3.79966e+07	3.79473e+07	3.78756e+07	3.77904e+07	3.77044e+07	2.23615e+08	8894.94	8924.47	8980.13
											3.79787e+07	3.79584e+07	3.79087e+07	3.78365e+07	3.77508e+07	3.76644e+07	2.23386e+08	8889.67	8919.09	8974.9
											3.79579e+07	3.79375e+07	3.78876e+07	3.78152e+07	3.77293e+07	3.76426e+07	2.23261e+08	8886.65	8916.24	8972.19
											3.79498e+07	3.79294e+07	3.78794e+07	3.7807e+07	3.7721e+07	3.76343e+07	2.23212e+08	8885.52	8915.27	8971.36
											3.79491e+07	3.79287e+07	3.78787e+07	3.78063e+07	3.77202e+07	3.76335e+07	2.23208e+08	8885.41	8915.18	8971.28
											3.79491e+07	3.79287e+07	3.78787e+07	3.78063e+07	3.77202e+07	3.76335e+07	2.23208e+08	8885.41	8915.18	8971.28
											3.79491e+07	3.79287e+07	3.78787e+07	3.78063e+07	3.77202e+07	3.76335e+07	2.23208e+08	8885.41	8915.18	8971.28
											3.78374e+07	3.78164e+07	3.77655e+07	3.76919e+07	3.76049e+07	3.75173e+07	2.22536e+08	8868.49	8898.76	8955.37
											3.76894e+07	3.76682e+07	3.7617e+07	3.75429e+07	3.74553e+07	3.73672e+07	2.21657e+08	8846.3	8877.55	8935.05
											3.75839e+07	3.75629e+07	3.75116e+07	3.74375e+07	3.73496e+07	3.72613e+07	2.21034e+08	8830.51	8862.56	8920.8
											3.76035e+07	3.75824e+07	3.75312e+07	3.7457e+07	3.73692e+07	3.72809e+07	2.2115e+08	8833.46	8865.36	8923.46
											3.77955e+07	3.77743e+07	3.77232e+07	3.76495e+07	3.75625e+07	3.74749e+07	2.22287e+08	8862.56	8893.22	8950.17
											3.77981e+07	3.77777e+07	3.77272e+07	3.76538e+07	3.75668e+07	3.74792e+07	2.22309e+08	8863.31	8894.3	8951.43
											3.76955e+07	3.7676e+07	3.7626e+07	3.75529e+07	3.74657e+07	3.73779e+07	2.2171e+08	8848.35	8880.07	8937.8
											3.76069e+07	3.75877e+07	3.7538e+07	3.74647e+07	3.73774e+07	3.72893e+07	2.21189e+08	8835.12	8867.4	8925.56
											3.75928e+07	3.75735e+07	3.75237e+07	3.74503e+07	3.73629e+07	3.72746e+07	2.21104e+08	8833.04	8865.36	8923.57
											3.77936e+07	3.77733e+07	3.77229e+07	3.76495e+07	3.75624e+07	3.74749e+07	2.22283e+08	8862.68	8893.7	8950.86
											3.78305e+07	3.78097e+07	3.7759e+07	3.76856e+07	3.75987e+07	3.75113e+07	2.22498e+08	8867.95	8898.61	8955.48
											3.7796e+07	3.77755e+07	3.7725e+07	3.76516e+07	3.75645e+07	3.7477e+07	2.22296e+08	8863	8893.99	8951.12
											3.78068e+07	3.77869e+07	3.77369e+07	3.76639e+07	3.75772e+07	3.74898e+07	2.22367e+08	8864.48	8895.53	8952.7
											3.78703e+07	3.78497e+07	3.77992e+07	3.77258e+07	3.76389e+07	3.75513e+07	2.22735e+08	8872.89	8902.7	8958.87
											3.72317e+07	3.72119e+07	3.71611e+07	3.70866e+07	3.69979e+07	3.69086e+07	2.1896e+08	8776.35	8810.78	8871.06
											3.70911e+07	3.70715e+07	3.70206e+07	3.6946e+07	3.68573e+07	3.6768e+07	2.1813e+08	8753.93	8789.17	8850.24
											3.71182e+07	3.70985e+07	3.70476e+07	3.6973e+07	3.68844e+07	3.67951e+07	2.1829e+08	8758.29	8793.38	8854.33
											3.73049e+07	3.72848e+07	3.72338e+07	3.71594e+07	3.70711e+07	3.69821e+07	2.19391e+08	8787.75	8821.77	8881.78
											3.73565e+07	3.73362e+07	3.72852e+07	3.72109e+07	3.71227e+07	3.70338e+07	2.19695e+08	8795.83	8829.49	8889.19
											3.31729e+07	3.31613e+07	3.3117e+07	3.30474e+07	3.29624e+07	3.2876e+07	1.95095e+08	7961.1	8006.01	8073.45

## Sheet: (2) Insolation summary
Summer insolation integration along profile of Ih Artsan and Jargalant (WH m-2)					Summer insolation integration (WH m-2) of study area (DEM) in millenial time scale
Time interval	IA	JAR	Insolation excess in south-facing valley		Time interval	DEM*	IA*	JAR*	Insolation excess in south-facing valley
22-21 ka	3.67474e+07	3.31729e+07	0.0972731		22-21 ka	6.93774e+08	7.45494e+08	6.44271e+08	0.13578
21-20 ka	3.67258e+07	3.31613e+07	0.0970569		21-20 ka	6.93417e+08	7.44998e+08	6.44044e+08	0.135509
20-19 ka	3.66769e+07	3.3117e+07	0.0970628		20-19 ka	6.92488e+08	7.43999e+08	6.43165e+08	0.13553
19-18 ka	3.66075e+07	3.30474e+07	0.0972512		19-18 ka	6.91124e+08	7.42624e+08	6.41783e+08	0.13579
18-17 ka	3.65261e+07	3.29624e+07	0.0975676		18-17 ka	6.89502e+08	7.41034e+08	6.40093e+08	0.136217
17-16 ka	3.64446e+07	3.2876e+07	0.0979198		17-16 ka	6.8787e+08	7.39452e+08	6.38377e+08	0.136688
22-16 ka	2.16137e+08	1.95095e+08	0.0973556		22-16 ka	4.14817e+09	4.4576e+09	3.85173e+09	0.135918
June 21, 22 ka	8570.31	7961.1	0.0710834
June 21, 20 ka	8597.31	8006.01	0.0687771		Summer insolation integration (WH m-2) of study area (DEM) in specific days
June 21, the present-day	8649.94	8073.45	0.0666471		Time interval	DEM*	IA*	JAR*	Insolation excess in south-facing valley
					June 21, 22 ka	7833.13	8460.07	7604.54	0.101126
					June 1, 20 ka	8033.96	8522.66	7583.56	0.110189
					June 21, 20 ka	7864.38	8480.78	7648.66	0.0981191
					Aug 31, 20 ka	5347.18	6219.95	4697.03	0.244843
					June 1, the present-day	8062.02	8547.58	7615.12	0.10909
					June 6, the present-day	7929.27	8573.63	7687.65	0.103338
					June 21, the present-day	7918.73	8527.34	7714.35	0.095339
					July 15, the present-day	7458.45	8101.18	7192.95	0.112111
					Aug 1, the present-day	6851.13	7571.2	6462.45	0.146442
					Aug 31, the present-day	5407.67	6275.49	4765.95	0.240546
					*DEM used in Fig. 7
					* IA: Ih Artsan valley in Fig. 7
					* JAR: Jargalant valley in Fig. 7

## Sheet: (3) Timing_Synch
Name:		Ih Artsan	Jargalant			* Melt year
Present temperature (at headwall):		5.4 ℃	5.4 ℃			-Number: The year at which glacier completely melted.
Elevation of the distal moraine:		3222.2 m	2997.2 m			-Impossible: Unavailable to calculate ice surface profile with our model in due to too steep ice profile at the glacier toe.
Basal shear stress of initial glacier:		100 kPa	200 kPa			-Survived: Glacier did not completely melt at the end of the time of interest (16 ka).
Time of interest:		22-16 ka	22-16 ka
Timing and advance retreat pattern of the Ih Artsan and Jargalant glaciers in synchronous scenario
Site		IA	JAR	IA	JAR	IA	JAR	IA	JAR	IA	JAR	IA	JAR	IA	JAR	IA	JAR	IA	JAR	IA	JAR	IA	JAR
LGM tempearture anomaly anomaly		-6		-5.9		-5.8		-5.7		-5.6		-5.5		-5.4		-5.3		-5.2		-5.1		-5
Timing of maximum advance (ka)		18.35	17.23	17.89	17.89	19.31	19.31	19.79	19.79	20.17	20.17	20.23	20.23	20.79	20.35	20.8	20.8	22	22	22	22	22	22
Maximum advance elevation (m)		3301.29	3135.22	3302.05	3141.8	3307.65	3168.41	3310.71	3180.1	3315.42	3188.58	3321.13	3210.25	3333.57	3249.98	3378.15	3346.92	3385.13	3360.86	3385.13	3360.86	3385.13	3360.86
Maximum advance distance (m)		861.872	1018.25	863.631	1074.6	875.655	1156.45	883.566	1195.68	896.552	1245.15	913.748	1312.1	959.082	1436.22	1139.39	1794.39	1204.81	1884.97	1204.81	1884.97	1204.81	1884.97
* Melt year (ka)		Impossible	Survived	Survived	Survived	16.13	Survived	16.79	16.45	17.71	17.25	18.55	18.01	19.29	18.89	20.05	19.67	21.43	20.21	21.71	Impossible	21.83	21.41
Final terminal elevation (m)		3301.29	3160.36	3327.93	3216.64	3402.39	3356.75	3400.22	3364.31	3397.84	3366.85	3402.52	3366.88	3399.87	3370.84	3401.45	3367.82	3402.35	3370.7	3402.31	3369.33	3398.37	3368.36
Final terminal distance (m)		861.872	1130.62	936.09	1338.2	1304.33	1927.33	1297	2077.64	1289.85	2086.62	1304.81	2086.71	1295.88	2099.98	1301.04	2089.94	1304.21	2099.54	1304.05	2094.98	1291.4	2091.73
-22		Advance	Advance	Advance	Advance	Advance	Advance	Advance	Advance	Advance	Advance	Advance	Advance	Advance	Advance	Advance	Advance	Retreat	Retreat	Retreat	Retreat	Retreat	Retreat
-21.99		Advance	Advance	Advance	Advance	Advance	Advance	Advance	Advance	Advance	Advance	Advance	Advance	Advance	Advance	Advance	Advance	Retreat	Retreat	Retreat	Retreat	Retreat	Retreat
-21.97		Advance	Advance	Advance	Advance	Advance	Advance	Advance	Advance	Advance	Advance	Advance	Advance	Advance	Advance	Retreat	Retreat	Retreat	Retreat	Retreat	Retreat	Retreat	Retreat
-21.95		Advance	Advance	Advance	Advance	Advance	Advance	Advance	Advance	Advance	Advance	Advance	Advance	Advance	Advance	Retreat	Retreat	Retreat	Retreat	Retreat	Retreat	Retreat	Retreat
-21.93		Advance	Advance	Advance	Advance	Advance	Advance	Advance	Advance	Advance	Advance	Advance	Advance	Advance	Advance	Retreat	Retreat	Retreat	Retreat	Retreat	Retreat	Retreat	Retreat
-21.91		Advance	Advance	Advance	Advance	Advance	Advance	Advance	Advance	Advance	Advance	Advance	Advance	Advance	Advance	Advance	Advance	Retreat	Advance	Retreat	Retreat	Retreat	Retreat
-21.9		Advance	Advance	Advance	Advance	Advance	Advance	Advance	Advance	Advance	Advance	Advance	Advance	Advance	Advance	Advance	Advance	Retreat	Advance	Retreat	Retreat	Retreat	Retreat
-21.89		Advance	Advance	Advance	Advance	Advance	Advance	Advance	Advance	Advance	Advance	Advance	Advance	Advance	Advance	Retreat	Retreat	Retreat	Retreat	Retreat	Retreat	Retreat	Retreat
-21.87		Advance	Advance	Advance	Advance	Advance	Advance	Advance	Advance	Advance	Advance	Advance	Advance	Advance	Advance	Retreat	Retreat	Retreat	Retreat	Retreat	Retreat	Retreat	Retreat
-21.85		Advance	Advance	Advance	Advance	Advance	Advance	Advance	Advance	Advance	Advance	Advance	Advance	Advance	Advance	Retreat	Retreat	Retreat	Retreat	Retreat	Retreat	Retreat	Retreat
-21.83		Advance	Advance	Advance	Advance	Advance	Advance	Advance	Advance	Advance	Advance	Advance	Advance	Advance	Advance	Retreat	Retreat	Retreat	Retreat	Retreat	Retreat		Retreat
-21.81		Advance	Advance	Advance	Advance	Advance	Advance	Advance	Advance	Advance	Advance	Advance	Advance	Advance	Advance	Advance	Advance	Retreat	Retreat	Retreat	Retreat		Retreat
-21.8		Advance	Advance	Advance	Advance	Advance	Advance	Advance	Advance	Advance	Advance	Advance	Advance	Advance	Advance	Advance	Advance	Retreat	Retreat	Retreat	Retreat		Retreat
-21.79		Advance	Advance	Advance	Advance	Advance	Advance	Advance	Advance	Advance	Advance	Advance	Advance	Advance	Advance	Advance	Advance	Advance	Advance	Retreat	Advance		Retreat
-21.77		Advance	Advance	Advance	Advance	Advance	Advance	Advance	Advance	Advance	Advance	Advance	Advance	Advance	Advance	Advance	Advance	Retreat	Retreat	Retreat	Retreat		Retreat
-21.75		Advance	Advance	Advance	Advance	Advance	Advance	Advance	Advance	Advance	Advance	Advance	Advance	Advance	Advance	Advance	Advance	Advance	Advance	Advance	Advance		Retreat
-21.73		Advance	Advance	Advance	Advance	Advance	Advance	Advance	Advance	Advance	Advance	Advance	Advance	Advance	Advance	Advance	Advance	Retreat	Retreat	Advance	Retreat		Retreat
-21.71		Advance	Advance	Advance	Advance	Advance	Advance	Advance	Advance	Advance	Advance	Advance	Advance	Advance	Advance	Advance	Advance	Advance	Advance		Retreat		Retreat
-21.7		Advance	Advance	Advance	Advance	Advance	Advance	Advance	Advance	Advance	Advance	Advance	Advance	Advance	Advance	Advance	Advance	Advance	Advance		Retreat		Retreat
-21.69		Advance	Advance	Advance	Advance	Advance	Advance	Advance	Advance	Advance	Advance	Advance	Advance	Advance	Advance	Advance	Advance	Retreat	Retreat		Retreat		Retreat
-21.67		Advance	Advance	Advance	Advance	Advance	Advance	Advance	Advance	Advance	Advance	Advance	Advance	Advance	Advance	Advance	Advance	Retreat	Retreat		Retreat		Retreat
-21.65		Advance	Advance	Advance	Advance	Advance	Advance	Advance	Advance	Advance	Advance	Advance	Advance	Advance	Advance	Advance	Advance	Advance	Advance		Retreat		Retreat
-21.63		Advance	Advance	Advance	Advance	Advance	Advance	Advance	Advance	Advance	Advance	Advance	Advance	Advance	Advance	Advance	Advance	Retreat	Retreat		Retreat		Retreat
-21.61		Advance	Advance	Advance	Advance	Advance	Advance	Advance	Advance	Advance	Advance	Advance	Advance	Advance	Advance	Advance	Advance	Retreat	Retreat		Retreat		Retreat
-21.6		Advance	Advance	Advance	Advance	Advance	Advance	Advance	Advance	Advance	Advance	Advance	Advance	Advance	Advance	Advance	Advance	Retreat	Retreat		Retreat		Retreat
-21.59		Advance	Advance	Advance	Advance	Advance	Advance	Advance	Advance	Advance	Advance	Advance	Advance	Advance	Advance	Advance	Advance	Advance	Advance		Retreat		Retreat
-21.57		Advance	Advance	Advance	Advance	Advance	Advance	Advance	Advance	Advance	Advance	Advance	Advance	Advance	Advance	Advance	Advance	Retreat	Retreat		Retreat		Retreat
-21.55		Advance	Advance	Advance	Advance	Advance	Advance	Advance	Advance	Advance	Advance	Advance	Advance	Advance	Advance	Retreat	Retreat	Retreat	Retreat		Retreat		Retreat
-21.53		Advance	Advance	Advance	Advance	Advance	Advance	Advance	Advance	Advance	Advance	Advance	Advance	Advance	Advance	Retreat	Retreat	Retreat	Retreat		Retreat		Retreat
-21.51		Advance	Advance	Advance	Advance	Advance	Advance	Advance	Advance	Advance	Advance	Advance	Advance	Advance	Advance	Advance	Advance	Retreat	Retreat		Retreat		Retreat
-21.5		Advance	Advance	Advance	Advance	Advance	Advance	Advance	Advance	Advance	Advance	Advance	Advance	Advance	Advance	Advance	Advance	Retreat	Retreat		Retreat		Retreat
-21.49		Advance	Advance	Advance	Advance	Advance	Advance	Advance	Advance	Advance	Advance	Advance	Advance	Advance	Advance	Retreat	Retreat	Retreat	Retreat		Retreat		Retreat
-21.47		Advance	Advance	Advance	Advance	Advance	Advance	Advance	Advance	Advance	Advance	Advance	Advance	Advance	Advance	Retreat	Retreat	Retreat	Retreat		Retreat		Retreat
-21.45		Advance	Advance	Advance	Advance	Advance	Advance	Advance	Advance	Advance	Advance	Advance	Advance	Advance	Advance	Retreat	Retreat	Retreat	Retreat		Retreat		Retreat
-21.43		Advance	Advance	Advance	Advance	Advance	Advance	Advance	Advance	Advance	Advance	Advance	Advance	Advance	Advance	Advance	Advance		Retreat		Retreat		Retreat
-21.41		Advance	Advance	Advance	Advance	Advance	Advance	Advance	Advance	Advance	Advance	Advance	Advance	Advance	Advance	Advance	Advance		Retreat		Retreat
-21.4		Advance	Advance	Advance	Advance	Advance	Advance	Advance	Advance	Advance	Advance	Advance	Advance	Advance	Advance	Advance	Advance		Retreat		Retreat
-21.39		Advance	Advance	Advance	Advance	Advance	Advance	Advance	Advance	Advance	Advance	Advance	Advance	Advance	Advance	Retreat	Retreat		Retreat		Retreat
-21.37		Advance	Advance	Advance	Advance	Advance	Advance	Advance	Advance	Advance	Advance	Advance	Advance	Advance	Advance	Retreat	Retreat		Retreat		Retreat
-21.35		Advance	Advance	Advance	Advance	Advance	Advance	Advance	Advance	Advance	Advance	Advance	Advance	Advance	Advance	Retreat	Retreat		Retreat		Retreat
-21.33		Advance	Advance	Advance	Advance	Advance	Advance	Advance	Advance	Advance	Advance	Advance	Advance	Advance	Advance	Retreat	Retreat		Retreat		Retreat
-21.31		Advance	Advance	Advance	Advance	Advance	Advance	Advance	Advance	Advance	Advance	Advance	Advance	Advance	Advance	Retreat	Retreat		Retreat		Retreat
-21.3		Advance	Advance	Advance	Advance	Advance	Advance	Advance	Advance	Advance	Advance	Advance	Advance	Retreat	Advance	Retreat	Retreat		Retreat		Retreat
-21.29		Advance	Advance	Advance	Advance	Advance	Advance	Advance	Advance	Advance	Advance	Advance	Advance	Retreat	Retreat	Retreat	Retreat		Retreat		Retreat
-21.27		Advance	Advance	Advance	Advance	Advance	Advance	Advance	Advance	Advance	Advance	Advance	Advance	Advance	Advance	Advance	Advance		Retreat		Retreat
-21.25		Advance	Advance	Advance	Advance	Advance	Advance	Advance	Advance	Advance	Advance	Advance	Advance	Advance	Advance	Advance	Advance		Retreat		Retreat
-21.23		Advance	Advance	Advance	Advance	Advance	Advance	Advance	Advance	Advance	Advance	Advance	Advance	Advance	Advance	Advance	Advance		Retreat		Retreat
-21.21		Advance	Advance	Advance	Advance	Advance	Advance	Advance	Advance	Advance	Advance	Advance	Advance	Advance	Advance	Advance	Advance		Advance		Retreat
-21.2		Advance	Advance	Advance	Advance	Advance	Advance	Advance	Advance	Advance	Advance	Advance	Advance	Advance	Advance	Advance	Advance		Advance		Retreat
-21.19		Advance	Advance	Advance	Advance	Advance	Advance	Advance	Advance	Advance	Advance	Advance	Advance	Advance	Advance	Advance	Advance		Retreat		Retreat
-21.17		Advance	Advance	Advance	Advance	Advance	Advance	Advance	Advance	Advance	Advance	Advance	Advance	Advance	Advance	Advance	Advance		Retreat		Retreat
-21.15		Advance	Advance	Advance	Advance	Advance	Advance	Advance	Advance	Advance	Advance	Advance	Advance	Advance	Advance	Advance	Advance		Advance		Retreat
-21.13		Advance	Advance	Advance	Advance	Advance	Advance	Advance	Advance	Advance	Advance	Advance	Advance	Advance	Advance	Advance	Advance		Advance
-21.11		Advance	Advance	Advance	Advance	Advance	Advance	Advance	Advance	Advance	Advance	Advance	Advance	Advance	Advance	Advance	Advance		Advance
-21.1		Advance	Advance	Advance	Advance	Advance	Advance	Advance	Advance	Advance	Advance	Advance	Advance	Advance	Advance	Advance	Advance		Advance
-21.09		Advance	Advance	Advance	Advance	Advance	Advance	Advance	Advance	Advance	Advance	Advance	Advance	Advance	Advance	Advance	Advance		Advance
-21.07		Advance	Advance	Advance	Advance	Advance	Advance	Advance	Advance	Advance	Advance	Advance	Advance	Advance	Advance	Advance	Advance		Advance
-21.05		Advance	Advance	Advance	Advance	Advance	Advance	Advance	Advance	Advance	Advance	Advance	Advance	Advance	Advance	Advance	Advance		Advance
-21.03		Advance	Advance	Advance	Advance	Advance	Advance	Advance	Advance	Advance	Advance	Advance	Advance	Advance	Advance	Advance	Advance		Advance
-21.01		Advance	Advance	Advance	Advance	Advance	Advance	Advance	Advance	Advance	Advance	Advance	Advance	Advance	Advance	Advance	Advance		Advance
-21		Advance	Advance	Advance	Advance	Advance	Advance	Advance	Advance	Advance	Advance	Advance	Advance	Advance	Advance	Retreat	Retreat		Retreat
-20.99		Advance	Advance	Advance	Advance	Advance	Advance	Advance	Advance	Advance	Advance	Advance	Advance	Advance	Advance	Retreat	Retreat		Retreat
-20.97		Advance	Advance	Advance	Advance	Advance	Advance	Advance	Advance	Advance	Advance	Advance	Advance	Retreat	Advance	Retreat	Retreat		Retreat
-20.95		Advance	Advance	Advance	Advance	Advance	Advance	Advance	Advance	Advance	Advance	Advance	Advance	Advance	Advance	Advance	Advance		Retreat
-20.93		Advance	Advance	Advance	Advance	Advance	Advance	Advance	Advance	Advance	Advance	Advance	Advance	Advance	Advance	Advance	Advance		Advance
-20.91		Advance	Advance	Advance	Advance	Advance	Advance	Advance	Advance	Advance	Advance	Advance	Advance	Advance	Advance	Advance	Advance		Advance
-20.9		Advance	Advance	Advance	Advance	Advance	Advance	Advance	Advance	Advance	Advance	Advance	Advance	Advance	Advance	Advance	Advance		Advance
-20.89		Advance	Advance	Advance	Advance	Advance	Advance	Advance	Advance	Advance	Advance	Advance	Advance	Advance	Advance	Advance	Advance		Retreat
-20.87		Advance	Advance	Advance	Advance	Advance	Advance	Advance	Advance	Advance	Advance	Advance	Advance	Advance	Advance	Advance	Advance		Advance
-20.85		Advance	Advance	Advance	Advance	Advance	Advance	Advance	Advance	Advance	Advance	Advance	Advance	Advance	Advance	Retreat	Retreat		Retreat
-20.83		Advance	Advance	Advance	Advance	Advance	Advance	Advance	Advance	Advance	Advance	Advance	Advance	Advance	Advance	Advance	Advance		Retreat
-20.81		Advance	Advance	Advance	Advance	Advance	Advance	Advance	Advance	Advance	Advance	Advance	Advance	Advance	Advance	Advance	Advance		Advance
-20.8		Advance	Advance	Advance	Advance	Advance	Advance	Advance	Advance	Advance	Advance	Advance	Advance	Advance	Advance	Retreat	Retreat		Retreat
-20.79		Advance	Advance	Advance	Advance	Advance	Advance	Advance	Advance	Advance	Advance	Advance	Advance	Retreat	Retreat	Retreat	Retreat		Retreat
-20.77		Advance	Advance	Advance	Advance	Advance	Advance	Advance	Advance	Advance	Advance	Advance	Advance	Retreat	Retreat	Retreat	Retreat		Retreat
-20.75		Advance	Advance	Advance	Advance	Advance	Advance	Advance	Advance	Advance	Advance	Advance	Advance	Retreat	Retreat	Retreat	Retreat		Retreat
-20.73		Advance	Advance	Advance	Advance	Advance	Advance	Advance	Advance	Advance	Advance	Advance	Advance	Advance	Advance	Retreat	Retreat		Retreat
-20.71		Advance	Advance	Advance	Advance	Advance	Advance	Advance	Advance	Advance	Advance	Advance	Advance	Retreat	Advance	Retreat	Retreat		Retreat
-20.7		Advance	Advance	Advance	Advance	Advance	Advance	Advance	Advance	Advance	Advance	Advance	Advance	Retreat	Advance	Retreat	Retreat		Retreat
-20.69		Advance	Advance	Advance	Advance	Advance	Advance	Advance	Advance	Advance	Advance	Retreat	Retreat	Retreat	Retreat	Retreat	Retreat		Retreat
-20.67		Advance	Advance	Advance	Advance	Advance	Advance	Advance	Advance	Advance	Advance	Retreat	Retreat	Retreat	Retreat	Retreat	Retreat		Retreat
-20.65		Advance	Advance	Advance	Advance	Advance	Advance	Advance	Advance	Advance	Advance	Retreat	Retreat	Retreat	Retreat	Retreat	Retreat		Retreat
-20.63		Advance	Advance	Advance	Advance	Advance	Advance	Advance	Advance	Advance	Advance	Retreat	Retreat	Retreat	Retreat	Retreat	Retreat		Retreat
-20.61		Advance	Advance	Advance	Advance	Advance	Advance	Advance	Advance	Advance	Advance	Advance	Advance	Retreat	Retreat	Retreat	Retreat		Retreat
-20.6		Advance	Advance	Advance	Advance	Advance	Advance	Advance	Advance	Advance	Advance	Advance	Advance	Retreat	Retreat	Retreat	Retreat		Retreat
-20.59		Advance	Advance	Advance	Advance	Advance	Advance	Advance	Advance	Retreat	Retreat	Retreat	Retreat	Retreat	Retreat	Retreat	Retreat		Retreat
-20.57		Advance	Advance	Advance	Advance	Advance	Advance	Advance	Advance	Advance	Advance	Retreat	Retreat	Retreat	Retreat	Retreat	Retreat		Retreat
-20.55		Advance	Advance	Advance	Advance	Advance	Advance	Advance	Advance	Advance	Advance	Advance	Advance	Retreat	Retreat	Retreat	Retreat		Retreat
-20.53		Advance	Advance	Advance	Advance	Advance	Advance	Advance	Advance	Advance	Advance	Advance	Advance	Advance	Advance	Advance	Advance		Retreat
-20.51		Advance	Advance	Advance	Advance	Advance	Advance	Advance	Advance	Advance	Advance	Advance	Advance	Advance	Advance	Advance	Advance		Advance
-20.5		Advance	Advance	Advance	Advance	Advance	Advance	Advance	Advance	Advance	Advance	Advance	Advance	Advance	Advance	Advance	Advance		Advance
-20.49		Advance	Advance	Advance	Advance	Advance	Advance	Advance	Advance	Advance	Advance	Advance	Advance	Advance	Advance	Advance	Advance		Advance
-20.47		Advance	Advance	Advance	Advance	Advance	Advance	Advance	Advance	Advance	Advance	Advance	Advance	Advance	Advance	Retreat	Retreat		Retreat
-20.45		Advance	Advance	Advance	Advance	Advance	Advance	Advance	Advance	Advance	Advance	Advance	Advance	Advance	Advance	Advance	Advance		Advance
-20.43		Advance	Advance	Advance	Advance	Advance	Advance	Advance	Advance	Advance	Advance	Advance	Advance	Advance	Advance	Retreat	Advance		Retreat
-20.41		Advance	Advance	Advance	Advance	Advance	Advance	Advance	Advance	Advance	Advance	Advance	Advance	Advance	Advance	Advance	Advance		Advance
-20.4		Advance	Advance	Advance	Advance	Advance	Advance	Advance	Advance	Advance	Advance	Advance	Advance	Advance	Advance	Retreat	Retreat		Retreat
-20.39		Advance	Advance	Advance	Advance	Advance	Advance	Advance	Advance	Advance	Advance	Advance	Advance	Advance	Advance	Advance	Advance		Retreat
-20.37		Advance	Advance	Advance	Advance	Advance	Advance	Advance	Advance	Advance	Advance	Advance	Advance	Advance	Advance	Retreat	Retreat		Retreat
-20.35		Advance	Advance	Advance	Advance	Advance	Advance	Advance	Advance	Advance	Advance	Advance	Advance	Retreat	Retreat	Retreat	Retreat		Retreat
-20.33		Advance	Advance	Advance	Advance	Advance	Advance	Advance	Advance	Advance	Advance	Advance	Advance	Advance	Advance	Advance	Advance		Retreat
-20.31		Advance	Advance	Advance	Advance	Advance	Advance	Advance	Advance	Advance	Advance	Advance	Advance	Retreat	Retreat	Retreat	Retreat		Retreat
-20.3		Advance	Advance	Advance	Advance	Advance	Advance	Advance	Advance	Advance	Advance	Retreat	Retreat	Retreat	Retreat	Retreat	Retreat		Retreat
-20.29		Advance	Advance	Advance	Advance	Advance	Advance	Advance	Advance	Advance	Advance	Advance	Advance	Retreat	Retreat	Retreat	Retreat		Retreat
-20.27		Advance	Advance	Advance	Advance	Advance	Advance	Advance	Advance	Advance	Advance	Advance	Advance	Advance	Advance	Retreat	Retreat		Retreat
-20.25		Advance	Advance	Advance	Advance	Advance	Advance	Advance	Advance	Advance	Advance	Advance	Advance	Retreat	Advance	Retreat	Retreat		Retreat
-20.23		Advance	Advance	Advance	Advance	Advance	Advance	Advance	Advance	Advance	Advance	Retreat	Retreat	Retreat	Retreat	Retreat	Retreat		Retreat
-20.21		Advance	Advance	Advance	Advance	Advance	Advance	Advance	Advance	Advance	Advance	Retreat	Retreat	Retreat	Retreat	Retreat	Retreat
-20.2		Advance	Advance	Advance	Advance	Advance	Advance	Advance	Advance	Advance	Advance	Retreat	Retreat	Retreat	Retreat	Retreat	Retreat
-20.19		Advance	Advance	Advance	Advance	Advance	Advance	Advance	Advance	Advance	Advance	Retreat	Advance	Retreat	Retreat	Retreat	Retreat
-20.17		Advance	Advance	Advance	Advance	Advance	Advance	Advance	Advance	Retreat	Retreat	Retreat	Retreat	Retreat	Retreat	Retreat	Retreat
-20.15		Advance	Advance	Advance	Advance	Advance	Advance	Advance	Advance	Advance	Advance	Retreat	Retreat	Retreat	Retreat	Retreat	Retreat
-20.13		Advance	Advance	Advance	Advance	Advance	Advance	Advance	Advance	Retreat	Retreat	Retreat	Retreat	Retreat	Retreat	Retreat	Retreat
-20.11		Advance	Advance	Advance	Advance	Advance	Advance	Advance	Advance	Retreat	Retreat	Retreat	Retreat	Retreat	Retreat	Retreat	Retreat
-20.1		Advance	Advance	Advance	Advance	Advance	Advance	Advance	Advance	Retreat	Retreat	Retreat	Retreat	Retreat	Retreat	Retreat	Retreat
-20.09		Advance	Advance	Advance	Advance	Advance	Advance	Advance	Advance	Advance	Advance	Retreat	Retreat	Retreat	Retreat	Retreat	Retreat
-20.07		Advance	Advance	Advance	Advance	Advance	Advance	Advance	Advance	Advance	Advance	Retreat	Retreat	Retreat	Retreat	Retreat	Retreat
-20.05		Advance	Advance	Advance	Advance	Advance	Advance	Advance	Advance	Retreat	Advance	Retreat	Retreat	Retreat	Retreat		Retreat
-20.03		Advance	Advance	Advance	Advance	Advance	Advance	Advance	Advance	Advance	Advance	Retreat	Retreat	Retreat	Retreat		Retreat
-20.01		Advance	Advance	Advance	Advance	Advance	Advance	Retreat	Retreat	Retreat	Retreat	Retreat	Retreat	Retreat	Retreat		Retreat
-20		Advance	Advance	Advance	Advance	Retreat	Retreat	Retreat	Retreat	Retreat	Retreat	Retreat	Retreat	Retreat	Retreat		Retreat
-19.99		Advance	Advance	Advance	Advance	Advance	Advance	Advance	Advance	Retreat	Retreat	Retreat	Retreat	Retreat	Retreat		Retreat
-19.97		Advance	Advance	Advance	Advance	Advance	Advance	Advance	Advance	Retreat	Retreat	Retreat	Retreat	Retreat	Retreat		Retreat
-19.95		Advance	Advance	Advance	Advance	Advance	Advance	Advance	Advance	Retreat	Retreat	Retreat	Retreat	Retreat	Retreat		Retreat
-19.93		Advance	Advance	Advance	Advance	Advance	Advance	Retreat	Retreat	Retreat	Retreat	Retreat	Retreat	Retreat	Retreat		Retreat
-19.91		Advance	Advance	Advance	Advance	Advance	Advance	Retreat	Retreat	Retreat	Retreat	Retreat	Retreat	Retreat	Retreat		Retreat
-19.9		Advance	Advance	Advance	Advance	Advance	Advance	Retreat	Retreat	Retreat	Retreat	Retreat	Retreat	Retreat	Retreat		Retreat
-19.89		Advance	Advance	Advance	Advance	Advance	Advance	Advance	Advance	Retreat	Retreat	Retreat	Retreat	Retreat	Retreat		Retreat
-19.87		Advance	Advance	Advance	Advance	Advance	Advance	Advance	Advance	Retreat	Retreat	Retreat	Retreat	Retreat	Retreat		Retreat
-19.85		Advance	Advance	Advance	Advance	Advance	Advance	Advance	Advance	Retreat	Retreat	Retreat	Retreat	Retreat	Retreat		Retreat
-19.83		Advance	Advance	Advance	Advance	Advance	Advance	Advance	Advance	Retreat	Retreat	Retreat	Retreat	Retreat	Retreat		Retreat
-19.81		Advance	Advance	Advance	Advance	Advance	Advance	Advance	Advance	Retreat	Retreat	Retreat	Retreat	Retreat	Retreat		Retreat
-19.8		Advance	Advance	Advance	Advance	Advance	Advance	Advance	Advance	Retreat	Retreat	Retreat	Retreat	Retreat	Retreat		Retreat
-19.79		Advance	Advance	Advance	Advance	Advance	Advance	Retreat	Retreat	Retreat	Retreat	Retreat	Retreat	Retreat	Retreat		Retreat
-19.77		Advance	Advance	Advance	Advance	Advance	Advance	Retreat	Retreat	Retreat	Retreat	Retreat	Retreat	Retreat	Retreat		Retreat
-19.75		Advance	Advance	Advance	Advance	Advance	Advance	Retreat	Retreat	Retreat	Retreat	Retreat	Retreat	Retreat	Retreat		Retreat
-19.73		Advance	Advance	Advance	Advance	Advance	Advance	Retreat	Retreat	Retreat	Retreat	Retreat	Retreat	Retreat	Retreat		Retreat
-19.71		Advance	Advance	Advance	Advance	Advance	Advance	Retreat	Retreat	Retreat	Retreat	Retreat	Retreat	Retreat	Retreat		Retreat
-19.7		Advance	Advance	Advance	Advance	Advance	Advance	Retreat	Retreat	Retreat	Retreat	Retreat	Retreat	Retreat	Retreat		Retreat
-19.69		Advance	Advance	Advance	Advance	Retreat	Retreat	Retreat	Retreat	Retreat	Retreat	Retreat	Retreat	Retreat	Retreat		Retreat
-19.67		Advance	Advance	Advance	Advance	Retreat	Retreat	Retreat	Retreat	Retreat	Retreat	Retreat	Retreat	Retreat	Retreat
-19.65		Advance	Advance	Advance	Advance	Advance	Advance	Advance	Advance	Retreat	Retreat	Retreat	Retreat	Retreat	Retreat
-19.63		Advance	Advance	Advance	Advance	Retreat	Retreat	Retreat	Retreat	Retreat	Retreat	Retreat	Retreat	Retreat	Retreat
-19.61		Advance	Advance	Advance	Advance	Retreat	Retreat	Retreat	Retreat	Retreat	Retreat	Retreat	Retreat	Retreat	Retreat
-19.6		Advance	Advance	Retreat	Retreat	Retreat	Retreat	Retreat	Retreat	Retreat	Retreat	Retreat	Retreat	Retreat	Retreat
-19.59		Advance	Advance	Advance	Advance	Advance	Advance	Retreat	Retreat	Retreat	Retreat	Retreat	Retreat	Retreat	Retreat
-19.57		Advance	Advance	Advance	Advance	Advance	Advance	Retreat	Retreat	Retreat	Retreat	Retreat	Retreat	Retreat	Retreat
-19.55		Advance	Advance	Advance	Advance	Retreat	Retreat	Retreat	Retreat	Retreat	Retreat	Retreat	Retreat	Retreat	Retreat
-19.53		Advance	Advance	Advance	Advance	Advance	Advance	Advance	Advance	Retreat	Retreat	Retreat	Retreat	Retreat	Retreat
-19.51		Advance	Advance	Advance	Advance	Advance	Advance	Retreat	Retreat	Retreat	Retreat	Retreat	Retreat	Retreat	Retreat
-19.5		Advance	Advance	Advance	Advance	Advance	Advance	Retreat	Retreat	Retreat	Retreat	Retreat	Retreat	Retreat	Retreat
-19.49		Advance	Advance	Advance	Advance	Retreat	Advance	Retreat	Retreat	Retreat	Retreat	Retreat	Retreat	Retreat	Retreat
-19.47		Advance	Advance	Advance	Advance	Advance	Advance	Advance	Advance	Retreat	Retreat	Retreat	Retreat	Retreat	Retreat
-19.45		Advance	Advance	Advance	Advance	Advance	Advance	Retreat	Retreat	Retreat	Retreat	Retreat	Retreat	Retreat	Retreat
-19.43		Advance	Advance	Advance	Advance	Advance	Advance	Retreat	Retreat	Retreat	Retreat	Retreat	Retreat	Retreat	Retreat
-19.41		Advance	Advance	Advance	Advance	Advance	Advance	Advance	Advance	Retreat	Retreat	Retreat	Retreat	Retreat	Retreat
-19.4		Advance	Advance	Advance	Advance	Advance	Advance	Advance	Advance	Retreat	Retreat	Retreat	Retreat	Retreat	Retreat
-19.39		Advance	Advance	Advance	Advance	Advance	Advance	Retreat	Retreat	Retreat	Retreat	Retreat	Retreat	Retreat	Retreat
-19.37		Advance	Advance	Advance	Advance	Advance	Advance	Retreat	Retreat	Retreat	Retreat	Retreat	Retreat	Retreat	Retreat
-19.35		Advance	Advance	Advance	Advance	Advance	Advance	Retreat	Retreat	Retreat	Retreat	Retreat	Retreat	Retreat	Retreat
-19.33		Advance	Advance	Advance	Advance	Advance	Advance	Retreat	Retreat	Retreat	Retreat	Retreat	Retreat	Retreat	Retreat
-19.31		Advance	Advance	Advance	Advance	Retreat	Retreat	Retreat	Retreat	Retreat	Retreat	Retreat	Retreat	Retreat	Retreat
-19.3		Retreat	Retreat	Retreat	Retreat	Retreat	Retreat	Retreat	Retreat	Retreat	Retreat	Retreat	Retreat	Retreat	Retreat
-19.29		Advance	Advance	Retreat	Retreat	Retreat	Retreat	Retreat	Retreat	Retreat	Retreat	Retreat	Retreat		Retreat
-19.27		Advance	Advance	Advance	Advance	Retreat	Retreat	Retreat	Retreat	Retreat	Retreat	Retreat	Retreat		Retreat
-19.25		Advance	Advance	Advance	Advance	Retreat	Retreat	Retreat	Retreat	Retreat	Retreat	Retreat	Retreat		Retreat
-19.23		Advance	Advance	Retreat	Retreat	Retreat	Retreat	Retreat	Retreat	Retreat	Retreat	Retreat	Retreat		Retreat
-19.21		Advance	Advance	Advance	Advance	Advance	Advance	Retreat	Retreat	Retreat	Retreat	Retreat	Retreat		Retreat
-19.2		Advance	Advance	Advance	Advance	Advance	Advance	Retreat	Retreat	Retreat	Retreat	Retreat	Retreat		Retreat
-19.19		Advance	Advance	Advance	Advance	Advance	Advance	Advance	Advance	Retreat	Retreat	Retreat	Retreat		Retreat
-19.17		Advance	Advance	Advance	Advance	Retreat	Retreat	Retreat	Retreat	Retreat	Retreat	Retreat	Retreat		Retreat
-19.15		Advance	Advance	Advance	Advance	Advance	Advance	Retreat	Retreat	Retreat	Retreat	Retreat	Retreat		Retreat
-19.13		Advance	Advance	Advance	Advance	Advance	Advance	Advance	Advance	Retreat	Retreat	Retreat	Retreat		Retreat
-19.11		Advance	Advance	Advance	Advance	Retreat	Retreat	Retreat	Retreat	Retreat	Retreat	Retreat	Retreat		Retreat
-19.1		Advance	Advance	Advance	Advance	Retreat	Retreat	Retreat	Retreat	Retreat	Retreat	Retreat	Retreat		Retreat
-19.09		Advance	Advance	Retreat	Retreat	Retreat	Retreat	Retreat	Retreat	Retreat	Retreat	Retreat	Retreat		Retreat
-19.07		Advance	Advance	Advance	Advance	Retreat	Retreat	Retreat	Retreat	Retreat	Retreat	Retreat	Retreat		Retreat
-19.05		Advance	Advance	Advance	Advance	Advance	Advance	Retreat	Advance	Retreat	Retreat	Retreat	Retreat		Retreat
-19.03		Advance	Advance	Retreat	Retreat	Retreat	Retreat	Retreat	Retreat	Retreat	Retreat	Retreat	Retreat		Retreat
-19.01		Advance	Advance	Retreat	Retreat	Retreat	Retreat	Retreat	Retreat	Retreat	Retreat	Retreat	Retreat		Retreat
-19		Retreat	Retreat	Retreat	Retreat	Retreat	Retreat	Retreat	Retreat	Retreat	Retreat	Retreat	Retreat		Retreat
-18.99		Advance	Advance	Advance	Advance	Advance	Advance	Advance	Advance	Retreat	Retreat	Retreat	Retreat		Retreat
-18.97		Retreat	Retreat	Retreat	Retreat	Retreat	Retreat	Retreat	Retreat	Retreat	Retreat	Retreat	Retreat		Retreat
-18.95		Advance	Advance	Retreat	Retreat	Retreat	Retreat	Retreat	Retreat	Retreat	Retreat	Retreat	Retreat		Retreat
-18.93		Advance	Advance	Retreat	Retreat	Retreat	Retreat	Retreat	Retreat	Retreat	Retreat	Retreat	Retreat		Retreat
-18.91		Advance	Advance	Advance	Advance	Retreat	Retreat	Retreat	Retreat	Retreat	Retreat	Retreat	Retreat		Retreat
-18.9		Advance	Advance	Advance	Advance	Retreat	Retreat	Retreat	Retreat	Retreat	Retreat	Retreat	Retreat		Retreat
-18.89		Advance	Advance	Advance	Advance	Advance	Advance	Retreat	Retreat	Retreat	Retreat	Retreat	Retreat
-18.87		Advance	Advance	Advance	Advance	Retreat	Retreat	Retreat	Retreat	Retreat	Retreat	Retreat	Retreat
-18.85		Advance	Advance	Advance	Advance	Retreat	Retreat	Retreat	Retreat	Retreat	Retreat	Retreat	Retreat
-18.83		Advance	Advance	Advance	Advance	Advance	Advance	Retreat	Retreat	Retreat	Retreat	Retreat	Retreat
-18.81		Advance	Advance	Advance	Advance	Advance	Advance	Advance	Advance	Retreat	Retreat	Retreat	Retreat
-18.8		Advance	Advance	Advance	Advance	Advance	Advance	Advance	Advance	Retreat	Retreat	Retreat	Retreat
-18.79		Advance	Advance	Advance	Advance	Advance	Advance	Retreat	Retreat	Retreat	Retreat	Retreat	Retreat
-18.77		Advance	Advance	Advance	Advance	Advance	Advance	Retreat	Retreat	Retreat	Retreat	Retreat	Retreat
-18.75		Advance	Advance	Advance	Advance	Advance	Advance	Retreat	Retreat	Retreat	Retreat	Retreat	Retreat
-18.73		Advance	Advance	Advance	Advance	Advance	Advance	Retreat	Retreat	Retreat	Retreat	Retreat	Retreat
-18.71		Advance	Advance	Advance	Advance	Advance	Advance	Retreat	Retreat	Retreat	Retreat	Retreat	Retreat
-18.7		Advance	Advance	Retreat	Retreat	Retreat	Retreat	Retreat	Retreat	Retreat	Retreat	Retreat	Retreat
-18.69		Advance	Advance	Advance	Advance	Retreat	Retreat	Retreat	Retreat	Retreat	Retreat	Retreat	Retreat
-18.67		Advance	Advance	Advance	Advance	Advance	Advance	Retreat	Retreat	Retreat	Retreat	Retreat	Retreat
-18.65		Advance	Advance	Retreat	Retreat	Retreat	Retreat	Retreat	Retreat	Retreat	Retreat	Retreat	Retreat
-18.63		Retreat	Retreat	Retreat	Retreat	Retreat	Retreat	Retreat	Retreat	Retreat	Retreat	Retreat	Retreat
-18.61		Advance	Advance	Advance	Advance	Retreat	Retreat	Retreat	Retreat	Retreat	Retreat	Retreat	Retreat
-18.6		Advance	Advance	Advance	Advance	Retreat	Retreat	Retreat	Retreat	Retreat	Retreat	Retreat	Retreat
-18.59		Advance	Advance	Advance	Advance	Advance	Advance	Advance	Advance	Retreat	Retreat	Retreat	Retreat
-18.57		Advance	Advance	Advance	Advance	Advance	Advance	Retreat	Advance	Retreat	Retreat	Retreat	Retreat
-18.55		Advance	Advance	Advance	Advance	Advance	Advance	Advance	Advance	Retreat	Retreat		Retreat
-18.53		Advance	Advance	Advance	Advance	Advance	Advance	Advance	Advance	Retreat	Retreat		Retreat
-18.51		Advance	Advance	Retreat	Retreat	Retreat	Retreat	Retreat	Retreat	Retreat	Retreat		Retreat
-18.5		Advance	Advance	Retreat	Advance	Retreat	Retreat	Retreat	Retreat	Retreat	Retreat		Retreat
-18.49		Advance	Advance	Advance	Advance	Retreat	Retreat	Retreat	Retreat	Retreat	Retreat		Retreat
-18.47		Advance	Advance	Advance	Advance	Advance	Advance	Retreat	Retreat	Retreat	Retreat		Retreat
-18.45		Advance	Advance	Advance	Advance	Advance	Advance	Advance	Advance	Retreat	Retreat		Retreat
-18.43		Advance	Advance	Retreat	Retreat	Retreat	Retreat	Retreat	Retreat	Retreat	Retreat		Retreat
-18.41		Advance	Advance	Retreat	Retreat	Retreat	Retreat	Retreat	Retreat	Retreat	Retreat		Retreat
-18.4		Advance	Advance	Retreat	Retreat	Retreat	Retreat	Retreat	Retreat	Retreat	Retreat		Retreat
-18.39		Advance	Advance	Advance	Advance	Advance	Advance	Retreat	Retreat	Retreat	Retreat		Retreat
-18.37		Advance	Advance	Advance	Advance	Advance	Advance	Advance	Advance	Retreat	Advance		Retreat
-18.35		Advance	Advance	Retreat	Retreat	Retreat	Retreat	Retreat	Retreat	Retreat	Retreat		Retreat
-18.33			Advance	Advance	Advance	Retreat	Retreat	Retreat	Retreat	Retreat	Retreat		Retreat
-18.31			Retreat	Retreat	Retreat	Retreat	Retreat	Retreat	Retreat	Retreat	Retreat		Retreat
-18.3			Retreat	Retreat	Retreat	Retreat	Retreat	Retreat	Retreat	Retreat	Retreat		Retreat
-18.29			Advance	Advance	Advance	Retreat	Retreat	Retreat	Retreat	Retreat	Retreat		Retreat
-18.27			Retreat	Retreat	Retreat	Retreat	Retreat	Retreat	Retreat	Retreat	Retreat		Retreat
-18.25			Advance	Advance	Advance	Advance	Advance	Advance	Advance	Retreat	Retreat		Retreat
-18.23			Advance	Advance	Advance	Advance	Advance	Retreat	Retreat	Retreat	Retreat		Retreat
-18.21			Advance	Advance	Advance	Advance	Advance	Retreat	Retreat	Retreat	Retreat		Retreat
-18.2			Advance	Advance	Advance	Advance	Advance	Retreat	Retreat	Retreat	Retreat		Retreat
-18.19			Advance	Advance	Advance	Retreat	Retreat	Retreat	Retreat	Retreat	Retreat		Retreat
-18.17			Advance	Advance	Advance	Retreat	Retreat	Retreat	Retreat	Retreat	Retreat		Retreat
-18.15			Advance	Advance	Advance	Retreat	Retreat	Retreat	Retreat	Retreat	Retreat		Retreat
-18.13			Advance	Advance	Advance	Retreat	Retreat	Retreat	Retreat	Retreat	Retreat		Retreat
-18.11			Advance	Advance	Advance	Retreat	Retreat	Retreat	Retreat	Retreat	Retreat		Retreat
-18.1			Advance	Retreat	Retreat	Retreat	Retreat	Retreat	Retreat	Retreat	Retreat		Retreat
-18.09			Advance	Advance	Advance	Retreat	Retreat	Retreat	Retreat	Retreat	Retreat		Retreat
-18.07			Advance	Retreat	Retreat	Retreat	Retreat	Retreat	Retreat	Retreat	Retreat		Retreat
-18.05			Advance	Retreat	Retreat	Retreat	Retreat	Retreat	Retreat	Retreat	Retreat		Retreat
-18.03			Advance	Advance	Advance	Retreat	Retreat	Retreat	Retreat	Retreat	Retreat		Retreat
-18.01			Advance	Advance	Advance	Advance	Advance	Retreat	Retreat	Retreat	Retreat
-18			Advance	Advance	Advance	Advance	Advance	Retreat	Retreat	Retreat	Retreat
-17.99			Advance	Advance	Advance	Advance	Advance	Retreat	Retreat	Retreat	Retreat
-17.97			Advance	Advance	Advance	Retreat	Retreat	Retreat	Retreat	Retreat	Retreat
-17.95			Advance	Advance	Advance	Retreat	Retreat	Retreat	Retreat	Retreat	Retreat
-17.93			Advance	Advance	Advance	Retreat	Retreat	Retreat	Retreat	Retreat	Retreat
-17.91			Advance	Advance	Advance	Retreat	Retreat	Retreat	Retreat	Retreat	Retreat
-17.9			Advance	Advance	Advance	Retreat	Retreat	Retreat	Retreat	Retreat	Retreat
-17.89			Advance	Retreat	Retreat	Retreat	Retreat	Retreat	Retreat	Retreat	Retreat
-17.87			Advance	Retreat	Retreat	Retreat	Retreat	Retreat	Retreat	Retreat	Retreat
-17.85			Advance	Retreat	Retreat	Retreat	Retreat	Retreat	Retreat	Retreat	Retreat
-17.83			Advance	Retreat	Retreat	Retreat	Retreat	Retreat	Retreat	Retreat	Retreat
-17.81			Retreat	Retreat	Retreat	Retreat	Retreat	Retreat	Retreat	Retreat	Retreat
-17.8			Retreat	Retreat	Retreat	Retreat	Retreat	Retreat	Retreat	Retreat	Retreat
-17.79			Retreat	Retreat	Retreat	Retreat	Retreat	Retreat	Retreat	Retreat	Retreat
-17.77			Retreat	Retreat	Retreat	Retreat	Retreat	Retreat	Retreat	Retreat	Retreat
-17.75			Retreat	Retreat	Retreat	Retreat	Retreat	Retreat	Retreat	Retreat	Retreat
-17.73			Retreat	Retreat	Retreat	Retreat	Retreat	Retreat	Retreat	Retreat	Retreat
-17.71			Retreat	Retreat	Retreat	Retreat	Retreat	Retreat	Retreat		Retreat
-17.7			Retreat	Retreat	Retreat	Retreat	Retreat	Retreat	Retreat		Retreat
-17.69			Retreat	Retreat	Retreat	Retreat	Retreat	Retreat	Retreat		Retreat
-17.67			Retreat	Retreat	Retreat	Retreat	Retreat	Retreat	Retreat		Retreat
-17.65			Retreat	Retreat	Retreat	Retreat	Retreat	Retreat	Retreat		Retreat
-17.63			Retreat	Retreat	Retreat	Retreat	Retreat	Retreat	Retreat		Retreat
-17.61			Retreat	Retreat	Retreat	Retreat	Retreat	Retreat	Retreat		Retreat
-17.6			Retreat	Retreat	Retreat	Retreat	Retreat	Retreat	Retreat		Retreat
-17.59			Retreat	Retreat	Retreat	Retreat	Retreat	Retreat	Retreat		Retreat
-17.57			Advance	Retreat	Retreat	Retreat	Retreat	Retreat	Retreat		Retreat
-17.55			Retreat	Retreat	Retreat	Retreat	Retreat	Retreat	Retreat		Retreat
-17.53			Advance	Advance	Advance	Retreat	Retreat	Retreat	Retreat		Retreat
-17.51			Advance	Advance	Advance	Advance	Advance	Retreat	Retreat		Retreat
-17.5			Advance	Advance	Advance	Advance	Advance	Retreat	Retreat		Retreat
-17.49			Advance	Retreat	Retreat	Retreat	Retreat	Retreat	Retreat		Retreat
-17.47			Advance	Retreat	Retreat	Retreat	Retreat	Retreat	Retreat		Retreat
-17.45			Advance	Retreat	Retreat	Retreat	Retreat	Retreat	Retreat		Retreat
-17.43			Advance	Retreat	Retreat	Retreat	Retreat	Retreat	Retreat		Retreat
-17.41			Advance	Advance	Advance	Retreat	Retreat	Retreat	Retreat		Retreat
-17.4			Advance	Advance	Advance	Retreat	Retreat	Retreat	Retreat		Retreat
-17.39			Advance	Advance	Advance	Advance	Advance	Retreat	Retreat		Retreat
-17.37			Advance	Advance	Advance	Advance	Advance	Retreat	Retreat		Retreat
-17.35			Advance	Advance	Advance	Advance	Advance	Retreat	Retreat		Retreat
-17.33			Advance	Retreat	Retreat	Retreat	Retreat	Retreat	Retreat		Retreat
-17.31			Advance	Retreat	Retreat	Retreat	Retreat	Retreat	Retreat		Retreat
-17.3			Retreat	Retreat	Retreat	Retreat	Retreat	Retreat	Retreat		Retreat
-17.29			Advance	Advance	Advance	Retreat	Retreat	Retreat	Retreat		Retreat
-17.27			Retreat	Retreat	Retreat	Retreat	Retreat	Retreat	Retreat		Retreat
-17.25			Advance	Advance	Advance	Advance	Advance	Retreat	Retreat
-17.23			Retreat	Retreat	Retreat	Retreat	Retreat	Retreat	Retreat
-17.21			Retreat	Retreat	Retreat	Retreat	Retreat	Retreat	Retreat
-17.2			Retreat	Retreat	Retreat	Retreat	Retreat	Retreat	Retreat
-17.19			Retreat	Retreat	Retreat	Retreat	Retreat	Retreat	Retreat
-17.17			Retreat	Retreat	Retreat	Retreat	Retreat	Retreat	Retreat
-17.15			Advance	Advance	Advance	Retreat	Retreat	Retreat	Retreat
-17.13			Retreat	Retreat	Retreat	Retreat	Retreat	Retreat	Retreat
-17.11			Retreat	Retreat	Retreat	Retreat	Retreat	Retreat	Retreat
-17.1			Retreat	Retreat	Retreat	Retreat	Retreat	Retreat	Retreat
-17.09			Retreat	Retreat	Retreat	Retreat	Retreat	Retreat	Retreat
-17.07			Retreat	Retreat	Retreat	Retreat	Retreat	Retreat	Retreat
-17.05			Retreat	Retreat	Retreat	Retreat	Retreat	Retreat	Retreat
-17.03			Retreat	Retreat	Retreat	Retreat	Retreat	Retreat	Retreat
-17.01			Retreat	Retreat	Retreat	Retreat	Retreat	Retreat	Retreat
-17			Retreat	Retreat	Retreat	Retreat	Retreat	Retreat	Retreat
-16.99			Advance	Retreat	Retreat	Retreat	Retreat	Retreat	Retreat
-16.97			Advance	Retreat	Retreat	Retreat	Retreat	Retreat	Retreat
-16.95			Advance	Retreat	Advance	Retreat	Retreat	Retreat	Retreat
-16.93			Advance	Retreat	Retreat	Retreat	Retreat	Retreat	Retreat
-16.91			Retreat	Retreat	Retreat	Retreat	Retreat	Retreat	Retreat
-16.9			Retreat	Retreat	Retreat	Retreat	Retreat	Retreat	Retreat
-16.89			Retreat	Retreat	Retreat	Retreat	Retreat	Retreat	Retreat
-16.87			Retreat	Retreat	Retreat	Retreat	Retreat	Retreat	Retreat
-16.85			Retreat	Retreat	Retreat	Retreat	Retreat	Retreat	Retreat
-16.83			Retreat	Retreat	Retreat	Retreat	Retreat	Retreat	Retreat
-16.81			Retreat	Retreat	Retreat	Retreat	Retreat	Retreat	Retreat
-16.8			Retreat	Retreat	Retreat	Retreat	Retreat	Retreat	Retreat
-16.79			Advance	Retreat	Retreat	Retreat	Retreat		Retreat
-16.77			Retreat	Retreat	Retreat	Retreat	Retreat		Retreat
-16.75			Retreat	Retreat	Retreat	Retreat	Retreat		Retreat
-16.73			Retreat	Retreat	Retreat	Retreat	Retreat		Retreat
-16.71			Retreat	Retreat	Retreat	Retreat	Retreat		Retreat
-16.7			Retreat	Retreat	Retreat	Retreat	Retreat		Retreat
-16.69			Retreat	Retreat	Retreat	Retreat	Retreat		Retreat
-16.67			Retreat	Retreat	Retreat	Retreat	Retreat		Retreat
-16.65			Retreat	Retreat	Retreat	Retreat	Retreat		Retreat
-16.63			Retreat	Retreat	Retreat	Retreat	Retreat		Retreat
-16.61			Retreat	Retreat	Retreat	Retreat	Retreat		Retreat
-16.6			Retreat	Retreat	Retreat	Retreat	Retreat		Retreat
-16.59			Retreat	Retreat	Retreat	Retreat	Retreat		Retreat
-16.57			Retreat	Retreat	Retreat	Retreat	Retreat		Retreat
-16.55			Retreat	Retreat	Retreat	Retreat	Retreat		Retreat
-16.53			Retreat	Retreat	Retreat	Retreat	Retreat		Retreat
-16.51			Retreat	Retreat	Retreat	Retreat	Retreat		Retreat
-16.5			Retreat	Retreat	Retreat	Retreat	Retreat		Retreat
-16.49			Retreat	Retreat	Retreat	Retreat	Retreat		Retreat
-16.47			Retreat	Retreat	Retreat	Retreat	Retreat		Retreat
-16.45			Retreat	Retreat	Retreat	Retreat	Retreat
-16.43			Retreat	Retreat	Retreat	Retreat	Retreat
-16.41			Retreat	Retreat	Retreat	Retreat	Retreat
-16.4			Retreat	Retreat	Retreat	Retreat	Retreat
-16.39			Retreat	Retreat	Retreat	Retreat	Retreat
-16.37			Retreat	Retreat	Retreat	Retreat	Retreat
-16.35			Retreat	Retreat	Retreat	Retreat	Retreat
-16.33			Retreat	Retreat	Retreat	Retreat	Retreat
-16.31			Retreat	Retreat	Retreat	Retreat	Retreat
-16.3			Retreat	Retreat	Retreat	Retreat	Retreat
-16.29			Retreat	Retreat	Retreat	Retreat	Retreat
-16.27			Retreat	Retreat	Retreat	Retreat	Retreat
-16.25			Retreat	Retreat	Retreat	Retreat	Retreat
-16.23			Retreat	Retreat	Retreat	Retreat	Retreat
-16.21			Retreat	Retreat	Retreat	Retreat	Retreat
-16.2			Retreat	Retreat	Retreat	Retreat	Retreat
-16.19			Retreat	Retreat	Retreat	Retreat	Retreat
-16.17			Retreat	Retreat	Retreat	Retreat	Retreat
-16.15			Retreat	Retreat	Retreat	Retreat	Retreat
-16.13			Retreat	Retreat	Retreat		Retreat
-16.11			Retreat	Retreat	Retreat		Retreat
-16.1			Retreat	Retreat	Retreat		Retreat
-16.09			Retreat	Retreat	Retreat		Retreat
-16.07			Retreat	Retreat	Retreat		Retreat
-16.05			Retreat	Retreat	Retreat		Retreat
-16.03			Retreat	Retreat	Retreat		Retreat
-16.01			Retreat	Retreat	Retreat		Retreat
-16			Retreat	Retreat	Retreat		Retreat

## Sheet: (4) Timing_Asynch
Name:		Ih Artsan	Jargalant						* Melt year
Present temperature (at headwall):		5.4 ℃	4.9 ℃						-Number: The year at which glacier completely melted.
Elevation of the distal moraine:		3222.2 m	2997.2 m						-Impossible: Unavailable to calculate ice surface profile with our model in due to too steep ice profile at the glacier toe.
Basal shear stress of initial glacier:		100 kPa	200 kPa						-Survived: Glacier did not completely melt at the end of the time of interest (16 ka).
Time of interest:		22-16 ka	22-16 ka
Timing and advance retreat pattern of the Ih Artsan and Jargalant glaciers in asynchronous scenario														*JAR: Present day temperature is considered by lower than Ih Artsan's.
Site		IA	JAR	IA	JAR	IA	JAR	IA	JAR	IA	JAR	IA	JAR	*JAR-0.1	*JAR-0.2	*JAR-0.3	*JAR-0.4	*JAR-0.5	*JAR-0.6	*JAR-0.7	IA	JAR-0.1	IA	JAR	IA	JAR	IA	JAR	IA	JAR
LGM tempearture anomaly anomaly		-6		-5.9		-5.8		-5.7		-5.6		-5.5									-5.4		-5.3		-5.2		-5.1		-5
Maximum advance (ka)		18.35	16	17.89	16	19.31	16.61	19.79	16.71	20.17	16.77	20.23	20.23	20.13	19.79	18.35	17.87	17.13	16.77	16.61	20.79	17.87	20.8	18.35	22	19.79	22	20.01	22	20.23
Maximum advance elevation (m)		3301.29	3127	3302.05	3126.18	3307.65	3125.57	3310.71	3125.53	3315.42	3125.99	3321.13	3210.25	3186.63	3179.53	3164.73	3137.76	3129.06	3125.85	3125.33	3333.57	3137.34	3378.15	3162.09	3385.13	3178.83	3385.13	3185.97	3385.13	3194.41
Maximum advance distance (m)		861.872	909.29	863.631	919.701	875.655	926.193	883.566	936.725	896.552	951.095	913.748	1312.1	1232.32	1192.98	1144.47	1054.98	978.627	946.703	930.409	959.082	1050.57	1139.39	1136.14	1204.81	1189.7	1204.81	1228.57	1204.81	1270.6
* Melt year (ka)		Impossible	Survived	Survived	Survived	16.13	Survived	16.79	Survived	17.71	Survived	18.55	18.01	17.1	16.33	Survived	Survived	Survived	Survived	Survived	19.29	Survived	20.05	Survived	21.43	16.13	21.71	16.75	21.83	17.65
Final terminal elevation (m)		3301.29	3127	3327.93	3126.18	3402.39	3125.33	3400.22	3126.02	3397.84	3129.49	3402.52	3366.88	3370.43	2092.45	3330.17	3183.54	3136.58	3128.14	3125.66	3399.87	3179.5	3401.45	3270.69	3402.35	3362.99	3402.31	3368.08	3398.37	3366.02
Final terminal distance (m)		861.872	909.29	936.09	919.701	1304.33	930.28	1297	951.941	1289.85	981.605	1304.81	2086.71	2098.64	3368.57	1741.44	1213.11	1036.16	972.904	940.598	1295.88	1192.83	1301.04	1533.34	1304.21	2071.23	1304.05	2090.81	1291.4	2083.79
-22		Advance	Advance	Advance	Advance	Advance	Advance	Advance	Advance	Advance	Advance	Advance	Advance	Advance	Advance	Advance	Advance	Advance	Advance	Advance	Advance	Advance	Advance	Advance	Retreat	Advance	Retreat	Advance	Retreat	Advance
-21.99		Advance	Advance	Advance	Advance	Advance	Advance	Advance	Advance	Advance	Advance	Advance	Advance	Advance	Advance	Advance	Advance	Advance	Advance	Advance	Advance	Advance	Advance	Advance	Retreat	Advance	Retreat	Advance	Retreat	Advance
-21.97		Advance	Advance	Advance	Advance	Advance	Advance	Advance	Advance	Advance	Advance	Advance	Advance	Advance	Advance	Advance	Advance	Advance	Advance	Advance	Advance	Advance	Retreat	Advance	Retreat	Advance	Retreat	Advance	Retreat	Advance
-21.95		Advance	Advance	Advance	Advance	Advance	Advance	Advance	Advance	Advance	Advance	Advance	Advance	Advance	Advance	Advance	Advance	Advance	Advance	Advance	Advance	Advance	Retreat	Advance	Retreat	Advance	Retreat	Advance	Retreat	Advance
-21.93		Advance	Advance	Advance	Advance	Advance	Advance	Advance	Advance	Advance	Advance	Advance	Advance	Advance	Advance	Advance	Advance	Advance	Advance	Advance	Advance	Advance	Retreat	Advance	Retreat	Advance	Retreat	Advance	Retreat	Advance
-21.91		Advance	Advance	Advance	Advance	Advance	Advance	Advance	Advance	Advance	Advance	Advance	Advance	Advance	Advance	Advance	Advance	Advance	Advance	Advance	Advance	Advance	Advance	Advance	Retreat	Advance	Retreat	Advance	Retreat	Advance
-21.9		Advance	Advance	Advance	Advance	Advance	Advance	Advance	Advance	Advance	Advance	Advance	Advance	Advance	Advance	Advance	Advance	Advance	Advance	Advance	Advance	Advance	Advance	Advance	Retreat	Advance	Retreat	Advance	Retreat	Advance
-21.89		Advance	Advance	Advance	Advance	Advance	Advance	Advance	Advance	Advance	Advance	Advance	Advance	Advance	Advance	Advance	Advance	Advance	Advance	Advance	Advance	Advance	Retreat	Advance	Retreat	Advance	Retreat	Advance	Retreat	Advance
-21.87		Advance	Advance	Advance	Advance	Advance	Advance	Advance	Advance	Advance	Advance	Advance	Advance	Advance	Advance	Advance	Advance	Advance	Advance	Advance	Advance	Advance	Retreat	Advance	Retreat	Advance	Retreat	Advance	Retreat	Advance
-21.85		Advance	Advance	Advance	Advance	Advance	Advance	Advance	Advance	Advance	Advance	Advance	Advance	Advance	Advance	Advance	Advance	Advance	Advance	Advance	Advance	Advance	Retreat	Advance	Retreat	Advance	Retreat	Advance	Retreat	Advance
-21.83		Advance	Advance	Advance	Advance	Advance	Advance	Advance	Advance	Advance	Advance	Advance	Advance	Advance	Advance	Advance	Advance	Advance	Advance	Advance	Advance	Advance	Retreat	Advance	Retreat	Advance	Retreat	Advance		Advance
-21.81		Advance	Advance	Advance	Advance	Advance	Advance	Advance	Advance	Advance	Advance	Advance	Advance	Advance	Advance	Advance	Advance	Advance	Advance	Advance	Advance	Advance	Advance	Advance	Retreat	Advance	Retreat	Advance		Advance
-21.8		Advance	Advance	Advance	Advance	Advance	Advance	Advance	Advance	Advance	Advance	Advance	Advance	Advance	Advance	Advance	Advance	Advance	Advance	Advance	Advance	Advance	Advance	Advance	Retreat	Advance	Retreat	Advance		Advance
-21.79		Advance	Advance	Advance	Advance	Advance	Advance	Advance	Advance	Advance	Advance	Advance	Advance	Advance	Advance	Advance	Advance	Advance	Advance	Advance	Advance	Advance	Advance	Advance	Advance	Advance	Retreat	Advance		Advance
-21.77		Advance	Advance	Advance	Advance	Advance	Advance	Advance	Advance	Advance	Advance	Advance	Advance	Advance	Advance	Advance	Advance	Advance	Advance	Advance	Advance	Advance	Advance	Advance	Retreat	Advance	Retreat	Advance		Advance
-21.75		Advance	Advance	Advance	Advance	Advance	Advance	Advance	Advance	Advance	Advance	Advance	Advance	Advance	Advance	Advance	Advance	Advance	Advance	Advance	Advance	Advance	Advance	Advance	Advance	Advance	Advance	Advance		Advance
-21.73		Advance	Advance	Advance	Advance	Advance	Advance	Advance	Advance	Advance	Advance	Advance	Advance	Advance	Advance	Advance	Advance	Advance	Advance	Advance	Advance	Advance	Advance	Advance	Retreat	Advance	Advance	Advance		Advance
-21.71		Advance	Advance	Advance	Advance	Advance	Advance	Advance	Advance	Advance	Advance	Advance	Advance	Advance	Advance	Advance	Advance	Advance	Advance	Advance	Advance	Advance	Advance	Advance	Advance	Advance		Advance		Advance
-21.7		Advance	Advance	Advance	Advance	Advance	Advance	Advance	Advance	Advance	Advance	Advance	Advance	Advance	Advance	Advance	Advance	Advance	Advance	Advance	Advance	Advance	Advance	Advance	Advance	Advance		Advance		Advance
-21.69		Advance	Advance	Advance	Advance	Advance	Advance	Advance	Advance	Advance	Advance	Advance	Advance	Advance	Advance	Advance	Advance	Advance	Advance	Advance	Advance	Advance	Advance	Advance	Retreat	Advance		Advance		Advance
-21.67		Advance	Advance	Advance	Advance	Advance	Advance	Advance	Advance	Advance	Advance	Advance	Advance	Advance	Advance	Advance	Advance	Advance	Advance	Advance	Advance	Advance	Advance	Advance	Retreat	Advance		Advance		Advance
-21.65		Advance	Advance	Advance	Advance	Advance	Advance	Advance	Advance	Advance	Advance	Advance	Advance	Advance	Advance	Advance	Advance	Advance	Advance	Advance	Advance	Advance	Advance	Advance	Advance	Advance		Advance		Advance
-21.63		Advance	Advance	Advance	Advance	Advance	Advance	Advance	Advance	Advance	Advance	Advance	Advance	Advance	Advance	Advance	Advance	Advance	Advance	Advance	Advance	Advance	Advance	Advance	Retreat	Advance		Advance		Advance
-21.61		Advance	Advance	Advance	Advance	Advance	Advance	Advance	Advance	Advance	Advance	Advance	Advance	Advance	Advance	Advance	Advance	Advance	Advance	Advance	Advance	Advance	Advance	Advance	Retreat	Advance		Advance		Advance
-21.6		Advance	Advance	Advance	Advance	Advance	Advance	Advance	Advance	Advance	Advance	Advance	Advance	Advance	Advance	Advance	Advance	Advance	Advance	Advance	Advance	Advance	Advance	Advance	Retreat	Advance		Advance		Advance
-21.59		Advance	Advance	Advance	Advance	Advance	Advance	Advance	Advance	Advance	Advance	Advance	Advance	Advance	Advance	Advance	Advance	Advance	Advance	Advance	Advance	Advance	Advance	Advance	Advance	Advance		Advance		Advance
-21.57		Advance	Advance	Advance	Advance	Advance	Advance	Advance	Advance	Advance	Advance	Advance	Advance	Advance	Advance	Advance	Advance	Advance	Advance	Advance	Advance	Advance	Advance	Advance	Retreat	Advance		Advance		Advance
-21.55		Advance	Advance	Advance	Advance	Advance	Advance	Advance	Advance	Advance	Advance	Advance	Advance	Advance	Advance	Advance	Advance	Advance	Advance	Advance	Advance	Advance	Retreat	Advance	Retreat	Advance		Advance		Advance
-21.53		Advance	Advance	Advance	Advance	Advance	Advance	Advance	Advance	Advance	Advance	Advance	Advance	Advance	Advance	Advance	Advance	Advance	Advance	Advance	Advance	Advance	Retreat	Advance	Retreat	Advance		Advance		Advance
-21.51		Advance	Advance	Advance	Advance	Advance	Advance	Advance	Advance	Advance	Advance	Advance	Advance	Advance	Advance	Advance	Advance	Advance	Advance	Advance	Advance	Advance	Advance	Advance	Retreat	Advance		Advance		Advance
-21.5		Advance	Advance	Advance	Advance	Advance	Advance	Advance	Advance	Advance	Advance	Advance	Advance	Advance	Advance	Advance	Advance	Advance	Advance	Advance	Advance	Advance	Advance	Advance	Retreat	Advance		Advance		Advance
-21.49		Advance	Advance	Advance	Advance	Advance	Advance	Advance	Advance	Advance	Advance	Advance	Advance	Advance	Advance	Advance	Advance	Advance	Advance	Advance	Advance	Advance	Retreat	Advance	Retreat	Advance		Advance		Advance
-21.47		Advance	Advance	Advance	Advance	Advance	Advance	Advance	Advance	Advance	Advance	Advance	Advance	Advance	Advance	Advance	Advance	Advance	Advance	Advance	Advance	Advance	Retreat	Advance	Retreat	Advance		Advance		Advance
-21.45		Advance	Advance	Advance	Advance	Advance	Advance	Advance	Advance	Advance	Advance	Advance	Advance	Advance	Advance	Advance	Advance	Advance	Advance	Advance	Advance	Advance	Retreat	Advance	Retreat	Advance		Advance		Advance
-21.43		Advance	Advance	Advance	Advance	Advance	Advance	Advance	Advance	Advance	Advance	Advance	Advance	Advance	Advance	Advance	Advance	Advance	Advance	Advance	Advance	Advance	Advance	Advance		Advance		Advance		Advance
-21.41		Advance	Advance	Advance	Advance	Advance	Advance	Advance	Advance	Advance	Advance	Advance	Advance	Advance	Advance	Advance	Advance	Advance	Advance	Advance	Advance	Advance	Advance	Advance		Advance		Advance		Advance
-21.4		Advance	Advance	Advance	Advance	Advance	Advance	Advance	Advance	Advance	Advance	Advance	Advance	Advance	Advance	Advance	Advance	Advance	Advance	Advance	Advance	Advance	Advance	Advance		Advance		Advance		Advance
-21.39		Advance	Advance	Advance	Advance	Advance	Advance	Advance	Advance	Advance	Advance	Advance	Advance	Advance	Advance	Advance	Advance	Advance	Advance	Advance	Advance	Advance	Retreat	Advance		Advance		Advance		Advance
-21.37		Advance	Advance	Advance	Advance	Advance	Advance	Advance	Advance	Advance	Advance	Advance	Advance	Advance	Advance	Advance	Advance	Advance	Advance	Advance	Advance	Advance	Retreat	Advance		Advance		Advance		Advance
-21.35		Advance	Advance	Advance	Advance	Advance	Advance	Advance	Advance	Advance	Advance	Advance	Advance	Advance	Advance	Advance	Advance	Advance	Advance	Advance	Advance	Advance	Retreat	Advance		Advance		Advance		Advance
-21.33		Advance	Advance	Advance	Advance	Advance	Advance	Advance	Advance	Advance	Advance	Advance	Advance	Advance	Advance	Advance	Advance	Advance	Advance	Advance	Advance	Advance	Retreat	Advance		Advance		Advance		Advance
-21.31		Advance	Advance	Advance	Advance	Advance	Advance	Advance	Advance	Advance	Advance	Advance	Advance	Advance	Advance	Advance	Advance	Advance	Advance	Advance	Advance	Advance	Retreat	Advance		Advance		Advance		Advance
-21.3		Advance	Advance	Advance	Advance	Advance	Advance	Advance	Advance	Advance	Advance	Advance	Advance	Advance	Advance	Advance	Advance	Advance	Advance	Advance	Retreat	Advance	Retreat	Advance		Advance		Advance		Advance
-21.29		Advance	Advance	Advance	Advance	Advance	Advance	Advance	Advance	Advance	Advance	Advance	Advance	Advance	Advance	Advance	Advance	Advance	Advance	Advance	Retreat	Advance	Retreat	Advance		Advance		Advance		Advance
-21.27		Advance	Advance	Advance	Advance	Advance	Advance	Advance	Advance	Advance	Advance	Advance	Advance	Advance	Advance	Advance	Advance	Advance	Advance	Advance	Advance	Advance	Advance	Advance		Advance		Advance		Advance
-21.25		Advance	Advance	Advance	Advance	Advance	Advance	Advance	Advance	Advance	Advance	Advance	Advance	Advance	Advance	Advance	Advance	Advance	Advance	Advance	Advance	Advance	Advance	Advance		Advance		Advance		Advance
-21.23		Advance	Advance	Advance	Advance	Advance	Advance	Advance	Advance	Advance	Advance	Advance	Advance	Advance	Advance	Advance	Advance	Advance	Advance	Advance	Advance	Advance	Advance	Advance		Advance		Advance		Advance
-21.21		Advance	Advance	Advance	Advance	Advance	Advance	Advance	Advance	Advance	Advance	Advance	Advance	Advance	Advance	Advance	Advance	Advance	Advance	Advance	Advance	Advance	Advance	Advance		Advance		Advance		Advance
-21.2		Advance	Advance	Advance	Advance	Advance	Advance	Advance	Advance	Advance	Advance	Advance	Advance	Advance	Advance	Advance	Advance	Advance	Advance	Advance	Advance	Advance	Advance	Advance		Advance		Advance		Advance
-21.19		Advance	Advance	Advance	Advance	Advance	Advance	Advance	Advance	Advance	Advance	Advance	Advance	Advance	Advance	Advance	Advance	Advance	Advance	Advance	Advance	Advance	Advance	Advance		Advance		Advance		Advance
-21.17		Advance	Advance	Advance	Advance	Advance	Advance	Advance	Advance	Advance	Advance	Advance	Advance	Advance	Advance	Advance	Advance	Advance	Advance	Advance	Advance	Advance	Advance	Advance		Advance		Advance		Advance
-21.15		Advance	Advance	Advance	Advance	Advance	Advance	Advance	Advance	Advance	Advance	Advance	Advance	Advance	Advance	Advance	Advance	Advance	Advance	Advance	Advance	Advance	Advance	Advance		Advance		Advance		Advance
-21.13		Advance	Advance	Advance	Advance	Advance	Advance	Advance	Advance	Advance	Advance	Advance	Advance	Advance	Advance	Advance	Advance	Advance	Advance	Advance	Advance	Advance	Advance	Advance		Advance		Advance		Advance
-21.11		Advance	Advance	Advance	Advance	Advance	Advance	Advance	Advance	Advance	Advance	Advance	Advance	Advance	Advance	Advance	Advance	Advance	Advance	Advance	Advance	Advance	Advance	Advance		Advance		Advance		Advance
-21.1		Advance	Advance	Advance	Advance	Advance	Advance	Advance	Advance	Advance	Advance	Advance	Advance	Advance	Advance	Advance	Advance	Advance	Advance	Advance	Advance	Advance	Advance	Advance		Advance		Advance		Advance
-21.09		Advance	Advance	Advance	Advance	Advance	Advance	Advance	Advance	Advance	Advance	Advance	Advance	Advance	Advance	Advance	Advance	Advance	Advance	Advance	Advance	Advance	Advance	Advance		Advance		Advance		Advance
-21.07		Advance	Advance	Advance	Advance	Advance	Advance	Advance	Advance	Advance	Advance	Advance	Advance	Advance	Advance	Advance	Advance	Advance	Advance	Advance	Advance	Advance	Advance	Advance		Advance		Advance		Advance
-21.05		Advance	Advance	Advance	Advance	Advance	Advance	Advance	Advance	Advance	Advance	Advance	Advance	Advance	Advance	Advance	Advance	Advance	Advance	Advance	Advance	Advance	Advance	Advance		Advance		Advance		Advance
-21.03		Advance	Advance	Advance	Advance	Advance	Advance	Advance	Advance	Advance	Advance	Advance	Advance	Advance	Advance	Advance	Advance	Advance	Advance	Advance	Advance	Advance	Advance	Advance		Advance		Advance		Advance
-21.01		Advance	Advance	Advance	Advance	Advance	Advance	Advance	Advance	Advance	Advance	Advance	Advance	Advance	Advance	Advance	Advance	Advance	Advance	Advance	Advance	Advance	Advance	Advance		Advance		Advance		Advance
-21		Advance	Advance	Advance	Advance	Advance	Advance	Advance	Advance	Advance	Advance	Advance	Advance	Advance	Advance	Advance	Advance	Advance	Advance	Advance	Advance	Advance	Retreat	Advance		Advance		Advance		Advance
-20.99		Advance	Advance	Advance	Advance	Advance	Advance	Advance	Advance	Advance	Advance	Advance	Advance	Advance	Advance	Advance	Advance	Advance	Advance	Advance	Advance	Advance	Retreat	Advance		Advance		Advance		Advance
-20.97		Advance	Advance	Advance	Advance	Advance	Advance	Advance	Advance	Advance	Advance	Advance	Advance	Advance	Advance	Advance	Advance	Advance	Advance	Advance	Retreat	Advance	Retreat	Advance		Advance		Advance		Advance
-20.95		Advance	Advance	Advance	Advance	Advance	Advance	Advance	Advance	Advance	Advance	Advance	Advance	Advance	Advance	Advance	Advance	Advance	Advance	Advance	Advance	Advance	Advance	Advance		Advance		Advance		Advance
-20.93		Advance	Advance	Advance	Advance	Advance	Advance	Advance	Advance	Advance	Advance	Advance	Advance	Advance	Advance	Advance	Advance	Advance	Advance	Advance	Advance	Advance	Advance	Advance		Advance		Advance		Advance
-20.91		Advance	Advance	Advance	Advance	Advance	Advance	Advance	Advance	Advance	Advance	Advance	Advance	Advance	Advance	Advance	Advance	Advance	Advance	Advance	Advance	Advance	Advance	Advance		Advance		Advance		Advance
-20.9		Advance	Advance	Advance	Advance	Advance	Advance	Advance	Advance	Advance	Advance	Advance	Advance	Advance	Advance	Advance	Advance	Advance	Advance	Advance	Advance	Advance	Advance	Advance		Advance		Advance		Advance
-20.89		Advance	Advance	Advance	Advance	Advance	Advance	Advance	Advance	Advance	Advance	Advance	Advance	Advance	Advance	Advance	Advance	Advance	Advance	Advance	Advance	Advance	Advance	Advance		Advance		Advance		Advance
-20.87		Advance	Advance	Advance	Advance	Advance	Advance	Advance	Advance	Advance	Advance	Advance	Advance	Advance	Advance	Advance	Advance	Advance	Advance	Advance	Advance	Advance	Advance	Advance		Advance		Advance		Advance
-20.85		Advance	Advance	Advance	Advance	Advance	Advance	Advance	Advance	Advance	Advance	Advance	Advance	Advance	Advance	Advance	Advance	Advance	Advance	Advance	Advance	Advance	Retreat	Advance		Advance		Advance		Advance
-20.83		Advance	Advance	Advance	Advance	Advance	Advance	Advance	Advance	Advance	Advance	Advance	Advance	Advance	Advance	Advance	Advance	Advance	Advance	Advance	Advance	Advance	Advance	Advance		Advance		Advance		Advance
-20.81		Advance	Advance	Advance	Advance	Advance	Advance	Advance	Advance	Advance	Advance	Advance	Advance	Advance	Advance	Advance	Advance	Advance	Advance	Advance	Advance	Advance	Advance	Advance		Advance		Advance		Advance
-20.8		Advance	Advance	Advance	Advance	Advance	Advance	Advance	Advance	Advance	Advance	Advance	Advance	Advance	Advance	Advance	Advance	Advance	Advance	Advance	Advance	Advance	Retreat	Advance		Advance		Advance		Advance
-20.79		Advance	Advance	Advance	Advance	Advance	Advance	Advance	Advance	Advance	Advance	Advance	Advance	Advance	Advance	Advance	Advance	Advance	Advance	Advance	Retreat	Advance	Retreat	Advance		Advance		Advance		Advance
-20.77		Advance	Advance	Advance	Advance	Advance	Advance	Advance	Advance	Advance	Advance	Advance	Advance	Advance	Advance	Advance	Advance	Advance	Advance	Advance	Retreat	Advance	Retreat	Advance		Advance		Advance		Advance
-20.75		Advance	Advance	Advance	Advance	Advance	Advance	Advance	Advance	Advance	Advance	Advance	Advance	Advance	Advance	Advance	Advance	Advance	Advance	Advance	Retreat	Advance	Retreat	Advance		Advance		Advance		Advance
-20.73		Advance	Advance	Advance	Advance	Advance	Advance	Advance	Advance	Advance	Advance	Advance	Advance	Advance	Advance	Advance	Advance	Advance	Advance	Advance	Advance	Advance	Retreat	Advance		Advance		Advance		Advance
-20.71		Advance	Advance	Advance	Advance	Advance	Advance	Advance	Advance	Advance	Advance	Advance	Advance	Advance	Advance	Advance	Advance	Advance	Advance	Advance	Retreat	Advance	Retreat	Advance		Advance		Advance		Advance
-20.7		Advance	Advance	Advance	Advance	Advance	Advance	Advance	Advance	Advance	Advance	Advance	Advance	Advance	Advance	Advance	Advance	Advance	Advance	Advance	Retreat	Advance	Retreat	Advance		Advance		Advance		Advance
-20.69		Advance	Advance	Advance	Advance	Advance	Advance	Advance	Advance	Advance	Advance	Retreat	Retreat	Advance	Advance	Advance	Advance	Advance	Advance	Advance	Retreat	Advance	Retreat	Advance		Advance		Advance		Advance
-20.67		Advance	Advance	Advance	Advance	Advance	Advance	Advance	Advance	Advance	Advance	Retreat	Retreat	Advance	Advance	Advance	Advance	Advance	Advance	Advance	Retreat	Advance	Retreat	Advance		Advance		Advance		Advance
-20.65		Advance	Advance	Advance	Advance	Advance	Advance	Advance	Advance	Advance	Advance	Retreat	Retreat	Advance	Advance	Advance	Advance	Advance	Advance	Advance	Retreat	Advance	Retreat	Advance		Advance		Advance		Advance
-20.63		Advance	Advance	Advance	Advance	Advance	Advance	Advance	Advance	Advance	Advance	Retreat	Retreat	Advance	Advance	Advance	Advance	Advance	Advance	Advance	Retreat	Advance	Retreat	Advance		Advance		Advance		Advance
-20.61		Advance	Advance	Advance	Advance	Advance	Advance	Advance	Advance	Advance	Advance	Advance	Advance	Advance	Advance	Advance	Advance	Advance	Advance	Advance	Retreat	Advance	Retreat	Advance		Advance		Advance		Advance
-20.6		Advance	Advance	Advance	Advance	Advance	Advance	Advance	Advance	Advance	Advance	Advance	Advance	Advance	Advance	Advance	Advance	Advance	Advance	Advance	Retreat	Advance	Retreat	Advance		Advance		Advance		Advance
-20.59		Advance	Advance	Advance	Advance	Advance	Advance	Advance	Advance	Retreat	Advance	Retreat	Retreat	Advance	Advance	Advance	Advance	Advance	Advance	Advance	Retreat	Advance	Retreat	Advance		Advance		Advance		Retreat
-20.57		Advance	Advance	Advance	Advance	Advance	Advance	Advance	Advance	Advance	Advance	Retreat	Retreat	Advance	Advance	Advance	Advance	Advance	Advance	Advance	Retreat	Advance	Retreat	Advance		Advance		Advance		Advance
-20.55		Advance	Advance	Advance	Advance	Advance	Advance	Advance	Advance	Advance	Advance	Advance	Advance	Advance	Advance	Advance	Advance	Advance	Advance	Advance	Retreat	Advance	Retreat	Advance		Advance		Advance		Advance
-20.53		Advance	Advance	Advance	Advance	Advance	Advance	Advance	Advance	Advance	Advance	Advance	Advance	Advance	Advance	Advance	Advance	Advance	Advance	Advance	Advance	Advance	Advance	Advance		Advance		Advance		Advance
-20.51		Advance	Advance	Advance	Advance	Advance	Advance	Advance	Advance	Advance	Advance	Advance	Advance	Advance	Advance	Advance	Advance	Advance	Advance	Advance	Advance	Advance	Advance	Advance		Advance		Advance		Advance
-20.5		Advance	Advance	Advance	Advance	Advance	Advance	Advance	Advance	Advance	Advance	Advance	Advance	Advance	Advance	Advance	Advance	Advance	Advance	Advance	Advance	Advance	Advance	Advance		Advance		Advance		Advance
-20.49		Advance	Advance	Advance	Advance	Advance	Advance	Advance	Advance	Advance	Advance	Advance	Advance	Advance	Advance	Advance	Advance	Advance	Advance	Advance	Advance	Advance	Advance	Advance		Advance		Advance		Advance
-20.47		Advance	Advance	Advance	Advance	Advance	Advance	Advance	Advance	Advance	Advance	Advance	Advance	Advance	Advance	Advance	Advance	Advance	Advance	Advance	Advance	Advance	Retreat	Advance		Advance		Advance		Advance
-20.45		Advance	Advance	Advance	Advance	Advance	Advance	Advance	Advance	Advance	Advance	Advance	Advance	Advance	Advance	Advance	Advance	Advance	Advance	Advance	Advance	Advance	Advance	Advance		Advance		Advance		Advance
-20.43		Advance	Advance	Advance	Advance	Advance	Advance	Advance	Advance	Advance	Advance	Advance	Advance	Advance	Advance	Advance	Advance	Advance	Advance	Advance	Advance	Advance	Retreat	Advance		Advance		Advance		Advance
-20.41		Advance	Advance	Advance	Advance	Advance	Advance	Advance	Advance	Advance	Advance	Advance	Advance	Advance	Advance	Advance	Advance	Advance	Advance	Advance	Advance	Advance	Advance	Advance		Advance		Advance		Advance
-20.4		Advance	Advance	Advance	Advance	Advance	Advance	Advance	Advance	Advance	Advance	Advance	Advance	Advance	Advance	Advance	Advance	Advance	Advance	Advance	Advance	Advance	Retreat	Advance		Advance		Advance		Advance
-20.39		Advance	Advance	Advance	Advance	Advance	Advance	Advance	Advance	Advance	Advance	Advance	Advance	Advance	Advance	Advance	Advance	Advance	Advance	Advance	Advance	Advance	Advance	Advance		Advance		Advance		Advance
-20.37		Advance	Advance	Advance	Advance	Advance	Advance	Advance	Advance	Advance	Advance	Advance	Advance	Advance	Advance	Advance	Advance	Advance	Advance	Advance	Advance	Advance	Retreat	Advance		Advance		Advance		Advance
-20.35		Advance	Advance	Advance	Advance	Advance	Advance	Advance	Advance	Advance	Advance	Advance	Advance	Advance	Advance	Advance	Advance	Advance	Advance	Advance	Retreat	Advance	Retreat	Advance		Advance		Advance		Advance
-20.33		Advance	Advance	Advance	Advance	Advance	Advance	Advance	Advance	Advance	Advance	Advance	Advance	Advance	Advance	Advance	Advance	Advance	Advance	Advance	Advance	Advance	Advance	Advance		Advance		Advance		Advance
-20.31		Advance	Advance	Advance	Advance	Advance	Advance	Advance	Advance	Advance	Advance	Advance	Advance	Advance	Advance	Advance	Advance	Advance	Advance	Advance	Retreat	Advance	Retreat	Advance		Advance		Advance		Advance
-20.3		Advance	Advance	Advance	Advance	Advance	Advance	Advance	Advance	Advance	Advance	Retreat	Retreat	Advance	Advance	Advance	Advance	Advance	Advance	Advance	Retreat	Advance	Retreat	Advance		Advance		Advance		Retreat
-20.29		Advance	Advance	Advance	Advance	Advance	Advance	Advance	Advance	Advance	Advance	Advance	Advance	Advance	Advance	Advance	Advance	Advance	Advance	Advance	Retreat	Advance	Retreat	Advance		Advance		Advance		Advance
-20.27		Advance	Advance	Advance	Advance	Advance	Advance	Advance	Advance	Advance	Advance	Advance	Advance	Advance	Advance	Advance	Advance	Advance	Advance	Advance	Advance	Advance	Retreat	Advance		Advance		Advance		Advance
-20.25		Advance	Advance	Advance	Advance	Advance	Advance	Advance	Advance	Advance	Advance	Advance	Advance	Advance	Advance	Advance	Advance	Advance	Advance	Advance	Retreat	Advance	Retreat	Advance		Advance		Advance		Advance
-20.23		Advance	Advance	Advance	Advance	Advance	Advance	Advance	Advance	Advance	Advance	Retreat	Retreat	Advance	Advance	Advance	Advance	Advance	Advance	Advance	Retreat	Advance	Retreat	Advance		Advance		Advance		Retreat
-20.21		Advance	Advance	Advance	Advance	Advance	Advance	Advance	Advance	Advance	Advance	Retreat	Retreat	Advance	Advance	Advance	Advance	Advance	Advance	Advance	Retreat	Advance	Retreat	Advance		Advance		Advance		Retreat
-20.2		Advance	Advance	Advance	Advance	Advance	Advance	Advance	Advance	Advance	Advance	Retreat	Retreat	Advance	Advance	Advance	Advance	Advance	Advance	Advance	Retreat	Advance	Retreat	Advance		Advance		Advance		Retreat
-20.19		Advance	Advance	Advance	Advance	Advance	Advance	Advance	Advance	Advance	Advance	Retreat	Advance	Advance	Advance	Advance	Advance	Advance	Advance	Advance	Retreat	Advance	Retreat	Advance		Advance		Advance		Advance
-20.17		Advance	Advance	Advance	Advance	Advance	Advance	Advance	Advance	Retreat	Advance	Retreat	Retreat	Retreat	Advance	Advance	Advance	Advance	Advance	Advance	Retreat	Advance	Retreat	Advance		Advance		Advance		Retreat
-20.15		Advance	Advance	Advance	Advance	Advance	Advance	Advance	Advance	Advance	Advance	Retreat	Retreat	Advance	Advance	Advance	Advance	Advance	Advance	Advance	Retreat	Advance	Retreat	Advance		Advance		Advance		Retreat
-20.13		Advance	Advance	Advance	Advance	Advance	Advance	Advance	Advance	Retreat	Advance	Retreat	Retreat	Retreat	Advance	Advance	Advance	Advance	Advance	Advance	Retreat	Advance	Retreat	Advance		Advance		Retreat		Retreat
-20.11		Advance	Advance	Advance	Advance	Advance	Advance	Advance	Advance	Retreat	Advance	Retreat	Retreat	Retreat	Advance	Advance	Advance	Advance	Advance	Advance	Retreat	Advance	Retreat	Advance		Advance		Retreat		Retreat
-20.1		Advance	Advance	Advance	Advance	Advance	Advance	Advance	Advance	Retreat	Advance	Retreat	Retreat	Retreat	Advance	Advance	Advance	Advance	Advance	Advance	Retreat	Advance	Retreat	Advance		Advance		Retreat		Retreat
-20.09		Advance	Advance	Advance	Advance	Advance	Advance	Advance	Advance	Advance	Advance	Retreat	Retreat	Advance	Advance	Advance	Advance	Advance	Advance	Advance	Retreat	Advance	Retreat	Advance		Advance		Advance		Retreat
-20.07		Advance	Advance	Advance	Advance	Advance	Advance	Advance	Advance	Advance	Advance	Retreat	Retreat	Advance	Advance	Advance	Advance	Advance	Advance	Advance	Retreat	Advance	Retreat	Advance		Advance		Advance		Retreat
-20.05		Advance	Advance	Advance	Advance	Advance	Advance	Advance	Advance	Retreat	Advance	Retreat	Retreat	Advance	Advance	Advance	Advance	Advance	Advance	Advance	Retreat	Advance		Advance		Advance		Advance		Retreat
-20.03		Advance	Advance	Advance	Advance	Advance	Advance	Advance	Advance	Advance	Advance	Retreat	Retreat	Advance	Advance	Advance	Advance	Advance	Advance	Advance	Retreat	Advance		Advance		Advance		Advance		Retreat
-20.01		Advance	Advance	Advance	Advance	Advance	Advance	Retreat	Advance	Retreat	Advance	Retreat	Retreat	Retreat	Retreat	Advance	Advance	Advance	Advance	Advance	Retreat	Advance		Advance		Retreat		Retreat		Retreat
-20		Advance	Advance	Advance	Advance	Retreat	Advance	Retreat	Advance	Retreat	Advance	Retreat	Retreat	Retreat	Retreat	Retreat	Advance	Advance	Advance	Advance	Retreat	Advance		Retreat		Retreat		Retreat		Retreat
-19.99		Advance	Advance	Advance	Advance	Advance	Advance	Advance	Advance	Retreat	Advance	Retreat	Retreat	Retreat	Advance	Advance	Advance	Advance	Advance	Advance	Retreat	Advance		Advance		Advance		Retreat		Retreat
-19.97		Advance	Advance	Advance	Advance	Advance	Advance	Advance	Advance	Retreat	Advance	Retreat	Retreat	Retreat	Advance	Advance	Advance	Advance	Advance	Advance	Retreat	Advance		Advance		Advance		Advance		Retreat
-19.95		Advance	Advance	Advance	Advance	Advance	Advance	Advance	Advance	Retreat	Advance	Retreat	Retreat	Retreat	Advance	Advance	Advance	Advance	Advance	Advance	Retreat	Advance		Advance		Advance		Retreat		Retreat
-19.93		Advance	Advance	Advance	Advance	Advance	Advance	Retreat	Advance	Retreat	Advance	Retreat	Retreat	Retreat	Retreat	Advance	Advance	Advance	Advance	Advance	Retreat	Advance		Advance		Advance		Retreat		Retreat
-19.91		Advance	Advance	Advance	Advance	Advance	Advance	Retreat	Advance	Retreat	Advance	Retreat	Retreat	Retreat	Retreat	Advance	Advance	Advance	Advance	Advance	Retreat	Advance		Advance		Advance		Retreat		Retreat
-19.9		Advance	Advance	Advance	Advance	Advance	Advance	Retreat	Advance	Retreat	Advance	Retreat	Retreat	Retreat	Retreat	Advance	Advance	Advance	Advance	Advance	Retreat	Advance		Advance		Advance		Retreat		Retreat
-19.89		Advance	Advance	Advance	Advance	Advance	Advance	Advance	Advance	Retreat	Advance	Retreat	Retreat	Retreat	Advance	Advance	Advance	Advance	Advance	Advance	Retreat	Advance		Advance		Advance		Retreat		Retreat
-19.87		Advance	Advance	Advance	Advance	Advance	Advance	Advance	Advance	Retreat	Advance	Retreat	Retreat	Retreat	Advance	Advance	Advance	Advance	Advance	Advance	Retreat	Advance		Advance		Advance		Retreat		Retreat
-19.85		Advance	Advance	Advance	Advance	Advance	Advance	Advance	Advance	Retreat	Advance	Retreat	Retreat	Retreat	Advance	Advance	Advance	Advance	Advance	Advance	Retreat	Advance		Advance		Advance		Advance		Retreat
-19.83		Advance	Advance	Advance	Advance	Advance	Advance	Advance	Advance	Retreat	Advance	Retreat	Retreat	Retreat	Advance	Advance	Advance	Advance	Advance	Advance	Retreat	Advance		Advance		Advance		Retreat		Retreat
-19.81		Advance	Advance	Advance	Advance	Advance	Advance	Advance	Advance	Retreat	Advance	Retreat	Retreat	Retreat	Advance	Advance	Advance	Advance	Advance	Advance	Retreat	Advance		Advance		Advance		Retreat		Retreat
-19.8		Advance	Advance	Advance	Advance	Advance	Advance	Advance	Advance	Retreat	Advance	Retreat	Retreat	Retreat	Advance	Advance	Advance	Advance	Advance	Advance	Retreat	Advance		Advance		Advance		Retreat		Retreat
-19.79		Advance	Advance	Advance	Advance	Advance	Advance	Retreat	Advance	Retreat	Advance	Retreat	Retreat	Retreat	Retreat	Advance	Advance	Advance	Advance	Advance	Retreat	Advance		Advance		Retreat		Retreat		Retreat
-19.77		Advance	Advance	Advance	Advance	Advance	Advance	Retreat	Advance	Retreat	Advance	Retreat	Retreat	Retreat	Retreat	Advance	Advance	Advance	Advance	Advance	Retreat	Advance		Advance		Advance		Retreat		Retreat
-19.75		Advance	Advance	Advance	Advance	Advance	Advance	Retreat	Advance	Retreat	Advance	Retreat	Retreat	Retreat	Retreat	Advance	Advance	Advance	Advance	Advance	Retreat	Advance		Advance		Retreat		Retreat		Retreat
-19.73		Advance	Advance	Advance	Advance	Advance	Advance	Retreat	Advance	Retreat	Advance	Retreat	Retreat	Retreat	Advance	Advance	Advance	Advance	Advance	Advance	Retreat	Advance		Advance		Advance		Retreat		Retreat
-19.71		Advance	Advance	Advance	Advance	Advance	Advance	Retreat	Advance	Retreat	Advance	Retreat	Retreat	Retreat	Retreat	Advance	Advance	Advance	Advance	Advance	Retreat	Advance		Advance		Advance		Retreat		Retreat
-19.7		Advance	Advance	Advance	Advance	Advance	Advance	Retreat	Advance	Retreat	Advance	Retreat	Retreat	Retreat	Retreat	Advance	Advance	Advance	Advance	Advance	Retreat	Advance		Advance		Advance		Retreat		Retreat
-19.69		Advance	Advance	Advance	Advance	Retreat	Advance	Retreat	Advance	Retreat	Advance	Retreat	Retreat	Retreat	Retreat	Retreat	Advance	Advance	Advance	Advance	Retreat	Advance		Retreat		Retreat		Retreat		Retreat
-19.67		Advance	Advance	Advance	Advance	Retreat	Advance	Retreat	Advance	Retreat	Advance	Retreat	Retreat	Retreat	Retreat	Advance	Advance	Advance	Advance	Advance	Retreat	Advance		Advance		Retreat		Retreat		Retreat
-19.65		Advance	Advance	Advance	Advance	Advance	Advance	Advance	Advance	Retreat	Advance	Retreat	Retreat	Retreat	Advance	Advance	Advance	Advance	Advance	Advance	Retreat	Advance		Advance		Advance		Retreat		Retreat
-19.63		Advance	Advance	Advance	Advance	Retreat	Advance	Retreat	Advance	Retreat	Advance	Retreat	Retreat	Retreat	Retreat	Retreat	Advance	Advance	Advance	Advance	Retreat	Advance		Retreat		Retreat		Retreat		Retreat
-19.61		Advance	Advance	Advance	Advance	Retreat	Advance	Retreat	Advance	Retreat	Advance	Retreat	Retreat	Retreat	Retreat	Retreat	Advance	Advance	Advance	Advance	Retreat	Advance		Retreat		Retreat		Retreat		Retreat
-19.6		Advance	Advance	Retreat	Advance	Retreat	Advance	Retreat	Advance	Retreat	Advance	Retreat	Retreat	Retreat	Retreat	Retreat	Advance	Advance	Advance	Advance	Retreat	Advance		Retreat		Retreat		Retreat		Retreat
-19.59		Advance	Advance	Advance	Advance	Advance	Advance	Retreat	Advance	Retreat	Advance	Retreat	Retreat	Retreat	Retreat	Advance	Advance	Advance	Advance	Advance	Retreat	Advance		Advance		Advance		Retreat		Retreat
-19.57		Advance	Advance	Advance	Advance	Advance	Advance	Retreat	Advance	Retreat	Advance	Retreat	Retreat	Retreat	Retreat	Advance	Advance	Advance	Advance	Advance	Retreat	Advance		Advance		Retreat		Retreat		Retreat
-19.55		Advance	Advance	Advance	Advance	Retreat	Advance	Retreat	Advance	Retreat	Advance	Retreat	Retreat	Retreat	Retreat	Retreat	Advance	Advance	Advance	Advance	Retreat	Advance		Advance		Retreat		Retreat		Retreat
-19.53		Advance	Advance	Advance	Advance	Advance	Advance	Advance	Advance	Retreat	Advance	Retreat	Retreat	Retreat	Advance	Advance	Advance	Advance	Advance	Advance	Retreat	Advance		Advance		Advance		Retreat		Retreat
-19.51		Advance	Advance	Advance	Advance	Advance	Advance	Retreat	Advance	Retreat	Advance	Retreat	Retreat	Retreat	Retreat	Advance	Advance	Advance	Advance	Advance	Retreat	Advance		Advance		Retreat		Retreat		Retreat
-19.5		Advance	Advance	Advance	Advance	Advance	Advance	Retreat	Advance	Retreat	Advance	Retreat	Retreat	Retreat	Retreat	Advance	Advance	Advance	Advance	Advance	Retreat	Advance		Advance		Retreat		Retreat		Retreat
-19.49		Advance	Advance	Advance	Advance	Retreat	Advance	Retreat	Advance	Retreat	Advance	Retreat	Retreat	Retreat	Retreat	Advance	Advance	Advance	Advance	Advance	Retreat	Advance		Advance		Retreat		Retreat		Retreat
-19.47		Advance	Advance	Advance	Advance	Advance	Advance	Advance	Advance	Retreat	Advance	Retreat	Retreat	Retreat	Advance	Advance	Advance	Advance	Advance	Advance	Retreat	Advance		Advance		Advance		Retreat		Retreat
-19.45		Advance	Advance	Advance	Advance	Advance	Advance	Retreat	Advance	Retreat	Advance	Retreat	Retreat	Retreat	Advance	Advance	Advance	Advance	Advance	Advance	Retreat	Advance		Advance		Advance		Retreat		Retreat
-19.43		Advance	Advance	Advance	Advance	Advance	Advance	Retreat	Advance	Retreat	Advance	Retreat	Retreat	Retreat	Advance	Advance	Advance	Advance	Advance	Advance	Retreat	Advance		Advance		Advance		Retreat		Retreat
-19.41		Advance	Advance	Advance	Advance	Advance	Advance	Advance	Advance	Retreat	Advance	Retreat	Retreat	Retreat	Advance	Advance	Advance	Advance	Advance	Advance	Retreat	Advance		Advance		Advance		Retreat		Retreat
-19.4		Advance	Advance	Advance	Advance	Advance	Advance	Advance	Advance	Retreat	Advance	Retreat	Retreat	Retreat	Advance	Advance	Advance	Advance	Advance	Advance	Retreat	Advance		Advance		Advance		Retreat		Retreat
-19.39		Advance	Advance	Advance	Advance	Advance	Advance	Retreat	Advance	Retreat	Advance	Retreat	Retreat	Retreat	Retreat	Advance	Advance	Advance	Advance	Advance	Retreat	Advance		Advance		Retreat		Retreat		Retreat
-19.37		Advance	Advance	Advance	Advance	Advance	Advance	Retreat	Advance	Retreat	Advance	Retreat	Retreat	Retreat	Retreat	Advance	Advance	Advance	Advance	Advance	Retreat	Advance		Advance		Retreat		Retreat		Retreat
-19.35		Advance	Advance	Advance	Advance	Advance	Advance	Retreat	Advance	Retreat	Advance	Retreat	Retreat	Retreat	Retreat	Advance	Advance	Advance	Advance	Advance	Retreat	Advance		Advance		Retreat		Retreat		Retreat
-19.33		Advance	Advance	Advance	Advance	Advance	Advance	Retreat	Advance	Retreat	Advance	Retreat	Retreat	Retreat	Retreat	Advance	Advance	Advance	Advance	Advance	Retreat	Advance		Advance		Retreat		Retreat		Retreat
-19.31		Advance	Advance	Advance	Advance	Retreat	Advance	Retreat	Advance	Retreat	Advance	Retreat	Retreat	Retreat	Retreat	Advance	Advance	Advance	Advance	Advance	Retreat	Advance		Advance		Retreat		Retreat		Retreat
-19.3		Retreat	Advance	Retreat	Advance	Retreat	Advance	Retreat	Advance	Retreat	Advance	Retreat	Retreat	Retreat	Retreat	Retreat	Retreat	Advance	Advance	Advance	Retreat	Retreat		Retreat		Retreat		Retreat		Retreat
-19.29		Advance	Advance	Retreat	Advance	Retreat	Advance	Retreat	Advance	Retreat	Advance	Retreat	Retreat	Retreat	Retreat	Retreat	Retreat	Advance	Advance	Advance		Retreat		Retreat		Retreat		Retreat		Retreat
-19.27		Advance	Advance	Advance	Advance	Retreat	Advance	Retreat	Advance	Retreat	Advance	Retreat	Retreat	Retreat	Retreat	Retreat	Advance	Advance	Advance	Advance		Advance		Retreat		Retreat		Retreat		Retreat
-19.25		Advance	Advance	Advance	Advance	Retreat	Advance	Retreat	Advance	Retreat	Advance	Retreat	Retreat	Retreat	Retreat	Retreat	Advance	Advance	Advance	Advance		Advance		Retreat		Retreat		Retreat		Retreat
-19.23		Advance	Advance	Retreat	Advance	Retreat	Advance	Retreat	Advance	Retreat	Advance	Retreat	Retreat	Retreat	Retreat	Retreat	Advance	Advance	Advance	Advance		Advance		Retreat		Retreat		Retreat		Retreat
-19.21		Advance	Advance	Advance	Advance	Advance	Advance	Retreat	Advance	Retreat	Advance	Retreat	Retreat	Retreat	Retreat	Advance	Advance	Advance	Advance	Advance		Advance		Advance		Retreat		Retreat		Retreat
-19.2		Advance	Advance	Advance	Advance	Advance	Advance	Retreat	Advance	Retreat	Advance	Retreat	Retreat	Retreat	Retreat	Advance	Advance	Advance	Advance	Advance		Advance		Advance		Retreat		Retreat		Retreat
-19.19		Advance	Advance	Advance	Advance	Advance	Advance	Advance	Advance	Retreat	Advance	Retreat	Retreat	Retreat	Advance	Advance	Advance	Advance	Advance	Advance		Advance		Advance		Advance		Advance		Retreat
-19.17		Advance	Advance	Advance	Advance	Retreat	Advance	Retreat	Advance	Retreat	Advance	Retreat	Retreat	Retreat	Retreat	Retreat	Advance	Advance	Advance	Advance		Advance		Retreat		Retreat		Retreat		Retreat
-19.15		Advance	Advance	Advance	Advance	Advance	Advance	Retreat	Advance	Retreat	Advance	Retreat	Retreat	Retreat	Retreat	Advance	Advance	Advance	Advance	Advance		Advance		Advance		Retreat		Retreat		Retreat
-19.13		Advance	Advance	Advance	Advance	Advance	Advance	Advance	Advance	Retreat	Advance	Retreat	Retreat	Retreat	Advance	Advance	Advance	Advance	Advance	Advance		Advance		Advance		Advance		Retreat		Retreat
-19.11		Advance	Advance	Advance	Advance	Retreat	Advance	Retreat	Advance	Retreat	Advance	Retreat	Retreat	Retreat	Retreat	Retreat	Advance	Advance	Advance	Advance		Advance		Advance		Retreat		Retreat		Retreat
-19.1		Advance	Advance	Advance	Advance	Retreat	Advance	Retreat	Advance	Retreat	Advance	Retreat	Retreat	Retreat	Retreat	Retreat	Advance	Advance	Advance	Advance		Advance		Advance		Retreat		Retreat		Retreat
-19.09		Advance	Advance	Retreat	Advance	Retreat	Advance	Retreat	Advance	Retreat	Advance	Retreat	Retreat	Retreat	Retreat	Retreat	Advance	Advance	Advance	Advance		Advance		Retreat		Retreat		Retreat		Retreat
-19.07		Advance	Advance	Advance	Advance	Retreat	Advance	Retreat	Advance	Retreat	Advance	Retreat	Retreat	Retreat	Retreat	Advance	Advance	Advance	Advance	Advance		Advance		Advance		Retreat		Retreat		Retreat
-19.05		Advance	Advance	Advance	Advance	Advance	Advance	Retreat	Advance	Retreat	Advance	Retreat	Retreat	Retreat	Advance	Advance	Advance	Advance	Advance	Advance		Advance		Advance		Advance		Retreat		Retreat
-19.03		Advance	Advance	Retreat	Advance	Retreat	Advance	Retreat	Advance	Retreat	Advance	Retreat	Retreat	Retreat	Retreat	Retreat	Retreat	Advance	Advance	Advance		Retreat		Retreat		Retreat		Retreat		Retreat
-19.01		Advance	Advance	Retreat	Advance	Retreat	Advance	Retreat	Advance	Retreat	Advance	Retreat	Retreat	Retreat	Retreat	Retreat	Retreat	Advance	Advance	Advance		Retreat		Retreat		Retreat		Retreat		Retreat
-19		Retreat	Advance	Retreat	Advance	Retreat	Advance	Retreat	Advance	Retreat	Advance	Retreat	Retreat	Retreat	Retreat	Retreat	Retreat	Advance	Advance	Advance		Retreat		Retreat		Retreat		Retreat		Retreat
-18.99		Advance	Advance	Advance	Advance	Advance	Advance	Advance	Advance	Retreat	Advance	Retreat	Retreat	Retreat	Advance	Advance	Advance	Advance	Advance	Advance		Advance		Advance		Advance		Retreat		Retreat
-18.97		Retreat	Advance	Retreat	Advance	Retreat	Advance	Retreat	Advance	Retreat	Advance	Retreat	Retreat	Retreat	Retreat	Retreat	Retreat	Advance	Advance	Advance		Retreat		Retreat		Retreat		Retreat		Retreat
-18.95		Advance	Advance	Retreat	Advance	Retreat	Advance	Retreat	Advance	Retreat	Advance	Retreat	Retreat	Retreat	Retreat	Retreat	Retreat	Advance	Advance	Advance		Retreat		Retreat		Retreat		Retreat		Retreat
-18.93		Advance	Advance	Retreat	Advance	Retreat	Advance	Retreat	Advance	Retreat	Advance	Retreat	Retreat	Retreat	Retreat	Retreat	Retreat	Advance	Advance	Advance		Retreat		Retreat		Retreat		Retreat		Retreat
-18.91		Advance	Advance	Advance	Advance	Retreat	Advance	Retreat	Advance	Retreat	Advance	Retreat	Retreat	Retreat	Retreat	Retreat	Advance	Advance	Advance	Advance		Advance		Retreat		Retreat		Retreat		Retreat
-18.9		Advance	Advance	Advance	Advance	Retreat	Advance	Retreat	Advance	Retreat	Advance	Retreat	Retreat	Retreat	Retreat	Retreat	Advance	Advance	Advance	Advance		Advance		Retreat		Retreat		Retreat		Retreat
-18.89		Advance	Advance	Advance	Advance	Advance	Advance	Retreat	Advance	Retreat	Advance	Retreat	Retreat	Retreat	Retreat	Advance	Advance	Advance	Advance	Advance		Advance		Advance		Advance		Retreat		Retreat
-18.87		Advance	Advance	Advance	Advance	Retreat	Advance	Retreat	Advance	Retreat	Advance	Retreat	Retreat	Retreat	Retreat	Advance	Advance	Advance	Advance	Advance		Advance		Advance		Retreat		Retreat		Retreat
-18.85		Advance	Advance	Advance	Advance	Retreat	Advance	Retreat	Advance	Retreat	Advance	Retreat	Retreat	Retreat	Retreat	Retreat	Advance	Advance	Advance	Advance		Advance		Retreat		Retreat		Retreat		Retreat
-18.83		Advance	Advance	Advance	Advance	Advance	Advance	Retreat	Advance	Retreat	Advance	Retreat	Retreat	Retreat	Retreat	Advance	Advance	Advance	Advance	Advance		Advance		Advance		Retreat		Retreat		Retreat
-18.81		Advance	Advance	Advance	Advance	Advance	Advance	Advance	Advance	Retreat	Advance	Retreat	Retreat	Retreat	Advance	Advance	Advance	Advance	Advance	Advance		Advance		Advance		Advance		Retreat		Retreat
-18.8		Advance	Advance	Advance	Advance	Advance	Advance	Advance	Advance	Retreat	Advance	Retreat	Retreat	Retreat	Advance	Advance	Advance	Advance	Advance	Advance		Advance		Advance		Advance		Retreat		Retreat
-18.79		Advance	Advance	Advance	Advance	Advance	Advance	Retreat	Advance	Retreat	Advance	Retreat	Retreat	Retreat	Retreat	Advance	Advance	Advance	Advance	Advance		Advance		Advance		Advance		Retreat		Retreat
-18.77		Advance	Advance	Advance	Advance	Advance	Advance	Retreat	Advance	Retreat	Advance	Retreat	Retreat	Retreat	Retreat	Advance	Advance	Advance	Advance	Advance		Advance		Advance		Retreat		Retreat		Retreat
-18.75		Advance	Advance	Advance	Advance	Advance	Advance	Retreat	Advance	Retreat	Advance	Retreat	Retreat	Retreat	Retreat	Advance	Advance	Advance	Advance	Advance		Advance		Advance		Retreat		Retreat		Retreat
-18.73		Advance	Advance	Advance	Advance	Advance	Advance	Retreat	Advance	Retreat	Advance	Retreat	Retreat	Retreat	Retreat	Advance	Advance	Advance	Advance	Advance		Advance		Advance		Retreat		Retreat		Retreat
-18.71		Advance	Advance	Advance	Advance	Advance	Advance	Retreat	Advance	Retreat	Advance	Retreat	Retreat	Retreat	Retreat	Advance	Advance	Advance	Advance	Advance		Advance		Advance		Retreat		Retreat		Retreat
-18.7		Advance	Advance	Retreat	Advance	Retreat	Advance	Retreat	Advance	Retreat	Advance	Retreat	Retreat	Retreat	Retreat	Retreat	Advance	Advance	Advance	Advance		Advance		Retreat		Retreat		Retreat		Retreat
-18.69		Advance	Advance	Advance	Advance	Retreat	Advance	Retreat	Advance	Retreat	Advance	Retreat	Retreat	Retreat	Retreat	Retreat	Advance	Advance	Advance	Advance		Advance		Retreat		Retreat		Retreat		Retreat
-18.67		Advance	Advance	Advance	Advance	Advance	Advance	Retreat	Advance	Retreat	Advance	Retreat	Retreat	Retreat	Advance	Advance	Advance	Advance	Advance	Advance		Advance		Advance		Advance		Retreat		Retreat
-18.65		Advance	Advance	Retreat	Advance	Retreat	Advance	Retreat	Advance	Retreat	Advance	Retreat	Retreat	Retreat	Retreat	Retreat	Advance	Advance	Advance	Advance		Advance		Retreat		Retreat		Retreat		Retreat
-18.63		Retreat	Advance	Retreat	Advance	Retreat	Advance	Retreat	Advance	Retreat	Advance	Retreat	Retreat	Retreat	Retreat	Retreat	Retreat	Advance	Advance	Advance		Retreat		Retreat		Retreat		Retreat		Retreat
-18.61		Advance	Advance	Advance	Advance	Retreat	Advance	Retreat	Advance	Retreat	Advance	Retreat	Retreat	Retreat	Retreat	Retreat	Advance	Advance	Advance	Advance		Advance		Retreat		Retreat		Retreat		Retreat
-18.6		Advance	Advance	Advance	Advance	Retreat	Advance	Retreat	Advance	Retreat	Advance	Retreat	Retreat	Retreat	Retreat	Retreat	Advance	Advance	Advance	Advance		Advance		Retreat		Retreat		Retreat		Retreat
-18.59		Advance	Advance	Advance	Advance	Advance	Advance	Advance	Advance	Retreat	Advance	Retreat	Retreat	Retreat	Advance	Advance	Advance	Advance	Advance	Advance		Advance		Advance		Advance		Advance		Retreat
-18.57		Advance	Advance	Advance	Advance	Advance	Advance	Retreat	Advance	Retreat	Advance	Retreat	Retreat	Retreat	Advance	Advance	Advance	Advance	Advance	Advance		Advance		Advance		Advance		Retreat		Retreat
-18.55		Advance	Advance	Advance	Advance	Advance	Advance	Advance	Advance	Retreat	Advance		Retreat	Retreat	Advance	Advance	Advance	Advance	Advance	Advance		Advance		Advance		Advance		Retreat		Retreat
-18.53		Advance	Advance	Advance	Advance	Advance	Advance	Advance	Advance	Retreat	Advance		Retreat	Retreat	Advance	Advance	Advance	Advance	Advance	Advance		Advance		Advance		Advance		Retreat		Retreat
-18.51		Advance	Advance	Retreat	Advance	Retreat	Advance	Retreat	Advance	Retreat	Advance		Retreat	Retreat	Retreat	Retreat	Advance	Advance	Advance	Advance		Advance		Retreat		Retreat		Retreat		Retreat
-18.5		Advance	Advance	Retreat	Advance	Retreat	Advance	Retreat	Advance	Retreat	Advance		Retreat	Retreat	Retreat	Retreat	Advance	Advance	Advance	Advance		Advance		Retreat		Retreat		Retreat		Retreat
-18.49		Advance	Advance	Advance	Advance	Retreat	Advance	Retreat	Advance	Retreat	Advance		Retreat	Retreat	Retreat	Retreat	Advance	Advance	Advance	Advance		Advance		Advance		Retreat		Retreat		Retreat
-18.47		Advance	Advance	Advance	Advance	Advance	Advance	Retreat	Advance	Retreat	Advance		Retreat	Retreat	Retreat	Advance	Advance	Advance	Advance	Advance		Advance		Advance		Retreat		Retreat		Retreat
-18.45		Advance	Advance	Advance	Advance	Advance	Advance	Advance	Advance	Retreat	Advance		Retreat	Retreat	Advance	Advance	Advance	Advance	Advance	Advance		Advance		Advance		Advance		Retreat		Retreat
-18.43		Advance	Advance	Retreat	Advance	Retreat	Advance	Retreat	Advance	Retreat	Advance		Retreat	Retreat	Retreat	Retreat	Retreat	Advance	Advance	Advance		Advance		Retreat		Retreat		Retreat		Retreat
-18.41		Advance	Advance	Retreat	Advance	Retreat	Advance	Retreat	Advance	Retreat	Advance		Retreat	Retreat	Retreat	Retreat	Advance	Advance	Advance	Advance		Advance		Retreat		Retreat		Retreat		Retreat
-18.4		Advance	Advance	Retreat	Advance	Retreat	Advance	Retreat	Advance	Retreat	Advance		Retreat	Retreat	Retreat	Retreat	Advance	Advance	Advance	Advance		Advance		Retreat		Retreat		Retreat		Retreat
-18.39		Advance	Advance	Advance	Advance	Advance	Advance	Retreat	Advance	Retreat	Advance		Retreat	Retreat	Retreat	Advance	Advance	Advance	Advance	Advance		Advance		Advance		Retreat		Retreat		Retreat
-18.37		Advance	Advance	Advance	Advance	Advance	Advance	Advance	Advance	Retreat	Advance		Retreat	Advance	Advance	Advance	Advance	Advance	Advance	Advance		Advance		Advance		Advance		Advance		Retreat
-18.35		Advance	Advance	Retreat	Advance	Retreat	Advance	Retreat	Advance	Retreat	Advance		Retreat	Retreat	Retreat	Retreat	Advance	Advance	Advance	Advance		Advance		Retreat		Retreat		Retreat		Retreat
-18.33			Advance	Advance	Advance	Retreat	Advance	Retreat	Advance	Retreat	Advance		Retreat	Retreat	Retreat	Retreat	Advance	Advance	Advance	Advance		Advance		Advance		Retreat		Retreat		Retreat
-18.31			Advance	Retreat	Advance	Retreat	Advance	Retreat	Advance	Retreat	Advance		Retreat	Retreat	Retreat	Retreat	Retreat	Advance	Advance	Advance		Retreat		Retreat		Retreat		Retreat		Retreat
-18.3			Advance	Retreat	Advance	Retreat	Advance	Retreat	Advance	Retreat	Advance		Retreat	Retreat	Retreat	Retreat	Retreat	Retreat	Advance	Advance		Retreat		Retreat		Retreat		Retreat		Retreat
-18.29			Advance	Advance	Advance	Retreat	Advance	Retreat	Advance	Retreat	Advance		Retreat	Retreat	Retreat	Advance	Advance	Advance	Advance	Advance		Advance		Advance		Retreat		Retreat		Retreat
-18.27			Advance	Retreat	Advance	Retreat	Advance	Retreat	Advance	Retreat	Advance		Retreat	Retreat	Retreat	Retreat	Retreat	Advance	Advance	Advance		Retreat		Retreat		Retreat		Retreat		Retreat
-18.25			Advance	Advance	Advance	Advance	Advance	Advance	Advance	Retreat	Advance		Retreat	Retreat	Advance	Advance	Advance	Advance	Advance	Advance		Advance		Advance		Advance		Retreat		Retreat
-18.23			Advance	Advance	Advance	Advance	Advance	Retreat	Advance	Retreat	Advance		Retreat	Retreat	Retreat	Advance	Advance	Advance	Advance	Advance		Advance		Advance		Retreat		Retreat		Retreat
-18.21			Advance	Advance	Advance	Advance	Advance	Retreat	Advance	Retreat	Advance		Retreat	Retreat	Retreat	Advance	Advance	Advance	Advance	Advance		Advance		Advance		Retreat		Retreat		Retreat
-18.2			Advance	Advance	Advance	Advance	Advance	Retreat	Advance	Retreat	Advance		Retreat	Retreat	Retreat	Advance	Advance	Advance	Advance	Advance		Advance		Advance		Retreat		Retreat		Retreat
-18.19			Advance	Advance	Advance	Retreat	Advance	Retreat	Advance	Retreat	Advance		Retreat	Retreat	Retreat	Retreat	Advance	Advance	Advance	Advance		Advance		Retreat		Retreat		Retreat		Retreat
-18.17			Advance	Advance	Advance	Retreat	Advance	Retreat	Advance	Retreat	Advance		Retreat	Retreat	Retreat	Retreat	Advance	Advance	Advance	Advance		Advance		Retreat		Retreat		Retreat		Retreat
-18.15			Advance	Advance	Advance	Retreat	Advance	Retreat	Advance	Retreat	Advance		Retreat	Retreat	Retreat	Retreat	Advance	Advance	Advance	Advance		Advance		Retreat		Retreat		Retreat		Retreat
-18.13			Advance	Advance	Advance	Retreat	Advance	Retreat	Advance	Retreat	Advance		Retreat	Retreat	Retreat	Retreat	Advance	Advance	Advance	Advance		Advance		Retreat		Retreat		Retreat		Retreat
-18.11			Advance	Advance	Advance	Retreat	Advance	Retreat	Advance	Retreat	Advance		Retreat	Retreat	Retreat	Retreat	Advance	Advance	Advance	Advance		Advance		Retreat		Retreat		Retreat		Retreat
-18.1			Advance	Retreat	Advance	Retreat	Advance	Retreat	Advance	Retreat	Advance		Retreat	Retreat	Retreat	Retreat	Advance	Advance	Advance	Advance		Advance		Retreat		Retreat		Retreat		Retreat
-18.09			Advance	Advance	Advance	Retreat	Advance	Retreat	Advance	Retreat	Advance		Retreat	Retreat	Retreat	Retreat	Advance	Advance	Advance	Advance		Advance		Retreat		Retreat		Retreat		Retreat
-18.07			Advance	Retreat	Advance	Retreat	Advance	Retreat	Advance	Retreat	Advance		Retreat	Retreat	Retreat	Retreat	Advance	Advance	Advance	Advance		Advance		Retreat		Retreat		Retreat		Retreat
-18.05			Advance	Retreat	Advance	Retreat	Advance	Retreat	Advance	Retreat	Advance		Retreat	Retreat	Retreat	Retreat	Advance	Advance	Advance	Advance		Advance		Retreat		Retreat		Retreat		Retreat
-18.03			Advance	Advance	Advance	Retreat	Advance	Retreat	Advance	Retreat	Advance		Retreat	Retreat	Retreat	Retreat	Advance	Advance	Advance	Advance		Advance		Retreat		Retreat		Retreat		Retreat
-18.01			Advance	Advance	Advance	Advance	Advance	Retreat	Advance	Retreat	Advance			Retreat	Retreat	Advance	Advance	Advance	Advance	Advance		Advance		Advance		Retreat		Retreat		Retreat
-18			Advance	Advance	Advance	Advance	Advance	Retreat	Advance	Retreat	Advance			Retreat	Retreat	Advance	Advance	Advance	Advance	Advance		Advance		Advance		Retreat		Retreat		Retreat
-17.99			Advance	Advance	Advance	Advance	Advance	Retreat	Advance	Retreat	Advance			Retreat	Retreat	Advance	Advance	Advance	Advance	Advance		Advance		Advance		Advance		Retreat		Retreat
-17.97			Advance	Advance	Advance	Retreat	Advance	Retreat	Advance	Retreat	Advance			Retreat	Retreat	Retreat	Advance	Advance	Advance	Advance		Advance		Retreat		Retreat		Retreat		Retreat
-17.95			Advance	Advance	Advance	Retreat	Advance	Retreat	Advance	Retreat	Advance			Retreat	Retreat	Retreat	Advance	Advance	Advance	Advance		Advance		Retreat		Retreat		Retreat		Retreat
-17.93			Advance	Advance	Advance	Retreat	Advance	Retreat	Advance	Retreat	Advance			Retreat	Retreat	Retreat	Advance	Advance	Advance	Advance		Advance		Retreat		Retreat		Retreat		Retreat
-17.91			Advance	Advance	Advance	Retreat	Advance	Retreat	Advance	Retreat	Advance			Retreat	Retreat	Retreat	Advance	Advance	Advance	Advance		Advance		Advance		Retreat		Retreat		Retreat
-17.9			Advance	Advance	Advance	Retreat	Advance	Retreat	Advance	Retreat	Advance			Retreat	Retreat	Retreat	Advance	Advance	Advance	Advance		Advance		Retreat		Retreat		Retreat		Retreat
-17.89			Advance	Retreat	Advance	Retreat	Advance	Retreat	Advance	Retreat	Advance			Retreat	Retreat	Retreat	Advance	Advance	Advance	Advance		Advance		Retreat		Retreat		Retreat		Retreat
-17.87			Advance	Retreat	Advance	Retreat	Advance	Retreat	Advance	Retreat	Advance			Retreat	Retreat	Retreat	Retreat	Advance	Advance	Advance		Retreat		Retreat		Retreat		Retreat		Retreat
-17.85			Advance	Retreat	Advance	Retreat	Advance	Retreat	Advance	Retreat	Advance			Retreat	Retreat	Retreat	Retreat	Advance	Advance	Advance		Retreat		Retreat		Retreat		Retreat		Retreat
-17.83			Advance	Retreat	Advance	Retreat	Advance	Retreat	Advance	Retreat	Advance			Retreat	Retreat	Retreat	Retreat	Advance	Advance	Advance		Retreat		Retreat		Retreat		Retreat		Retreat
-17.81			Advance	Retreat	Advance	Retreat	Advance	Retreat	Advance	Retreat	Advance			Retreat	Retreat	Retreat	Retreat	Advance	Advance	Advance		Retreat		Retreat		Retreat		Retreat		Retreat
-17.8			Advance	Retreat	Advance	Retreat	Advance	Retreat	Retreat	Retreat	Retreat			Retreat	Retreat	Retreat	Retreat	Retreat	Retreat	Advance		Retreat		Retreat		Retreat		Retreat		Retreat
-17.79			Advance	Retreat	Advance	Retreat	Advance	Retreat	Retreat	Retreat	Retreat			Retreat	Retreat	Retreat	Retreat	Retreat	Retreat	Advance		Retreat		Retreat		Retreat		Retreat		Retreat
-17.77			Advance	Retreat	Advance	Retreat	Retreat	Retreat	Retreat	Retreat	Retreat			Retreat	Retreat	Retreat	Retreat	Retreat	Retreat	Retreat		Retreat		Retreat		Retreat		Retreat		Retreat
-17.75			Advance	Retreat	Advance	Retreat	Advance	Retreat	Advance	Retreat	Advance			Retreat	Retreat	Retreat	Retreat	Retreat	Advance	Advance		Retreat		Retreat		Retreat		Retreat		Retreat
-17.73			Advance	Retreat	Advance	Retreat	Advance	Retreat	Advance	Retreat	Advance			Retreat	Retreat	Retreat	Retreat	Advance	Advance	Advance		Retreat		Retreat		Retreat		Retreat		Retreat
-17.71			Advance	Retreat	Advance	Retreat	Advance	Retreat	Advance		Advance			Retreat	Retreat	Retreat	Retreat	Retreat	Advance	Advance		Retreat		Retreat		Retreat		Retreat		Retreat
-17.7			Advance	Retreat	Advance	Retreat	Advance	Retreat	Advance		Advance			Retreat	Retreat	Retreat	Retreat	Retreat	Advance	Advance		Retreat		Retreat		Retreat		Retreat		Retreat
-17.69			Advance	Retreat	Advance	Retreat	Advance	Retreat	Advance		Advance			Retreat	Retreat	Retreat	Retreat	Retreat	Advance	Advance		Retreat		Retreat		Retreat		Retreat		Retreat
-17.67			Advance	Retreat	Advance	Retreat	Advance	Retreat	Advance		Retreat			Retreat	Retreat	Retreat	Retreat	Retreat	Retreat	Advance		Retreat		Retreat		Retreat		Retreat		Retreat
-17.65			Advance	Retreat	Advance	Retreat	Advance	Retreat	Advance		Retreat			Retreat	Retreat	Retreat	Retreat	Retreat	Retreat	Advance		Retreat		Retreat		Retreat		Retreat
-17.63			Advance	Retreat	Advance	Retreat	Advance	Retreat	Advance		Advance			Retreat	Retreat	Retreat	Retreat	Retreat	Advance	Advance		Retreat		Retreat		Retreat		Retreat
-17.61			Advance	Retreat	Advance	Retreat	Advance	Retreat	Advance		Retreat			Retreat	Retreat	Retreat	Retreat	Retreat	Retreat	Advance		Retreat		Retreat		Retreat		Retreat
-17.6			Advance	Retreat	Advance	Retreat	Retreat	Retreat	Retreat		Retreat			Retreat	Retreat	Retreat	Retreat	Retreat	Retreat	Retreat		Retreat		Retreat		Retreat		Retreat
-17.59			Advance	Retreat	Advance	Retreat	Retreat	Retreat	Retreat		Retreat			Retreat	Retreat	Retreat	Retreat	Retreat	Retreat	Retreat		Retreat		Retreat		Retreat		Retreat
-17.57			Advance	Retreat	Advance	Retreat	Advance	Retreat	Advance		Advance			Retreat	Retreat	Retreat	Retreat	Advance	Advance	Advance		Retreat		Retreat		Retreat		Retreat
-17.55			Advance	Retreat	Advance	Retreat	Advance	Retreat	Advance		Advance			Retreat	Retreat	Retreat	Retreat	Advance	Advance	Advance		Retreat		Retreat		Retreat		Retreat
-17.53			Advance	Advance	Advance	Retreat	Advance	Retreat	Advance		Advance			Retreat	Retreat	Retreat	Advance	Advance	Advance	Advance		Advance		Retreat		Retreat		Retreat
-17.51			Advance	Advance	Advance	Advance	Advance	Retreat	Advance		Advance			Retreat	Retreat	Advance	Advance	Advance	Advance	Advance		Advance		Advance		Retreat		Retreat
-17.5			Advance	Advance	Advance	Advance	Advance	Retreat	Advance		Advance			Retreat	Retreat	Advance	Advance	Advance	Advance	Advance		Advance		Advance		Retreat		Retreat
-17.49			Advance	Retreat	Advance	Retreat	Advance	Retreat	Advance		Advance			Retreat	Retreat	Retreat	Advance	Advance	Advance	Advance		Advance		Retreat		Retreat		Retreat
-17.47			Advance	Retreat	Advance	Retreat	Advance	Retreat	Advance		Advance			Retreat	Retreat	Retreat	Advance	Advance	Advance	Advance		Advance		Retreat		Retreat		Retreat
-17.45			Advance	Retreat	Advance	Retreat	Advance	Retreat	Advance		Advance			Retreat	Retreat	Retreat	Advance	Advance	Advance	Advance		Advance		Retreat		Retreat		Retreat
-17.43			Advance	Retreat	Advance	Retreat	Advance	Retreat	Advance		Advance			Retreat	Retreat	Retreat	Advance	Advance	Advance	Advance		Advance		Retreat		Retreat		Retreat
-17.41			Advance	Advance	Advance	Retreat	Advance	Retreat	Advance		Advance			Retreat	Retreat	Retreat	Advance	Advance	Advance	Advance		Advance		Retreat		Retreat		Retreat
-17.4			Advance	Advance	Advance	Retreat	Advance	Retreat	Advance		Advance			Retreat	Retreat	Retreat	Advance	Advance	Advance	Advance		Advance		Advance		Retreat		Retreat
-17.39			Advance	Advance	Advance	Advance	Advance	Retreat	Advance		Advance			Retreat	Retreat	Advance	Advance	Advance	Advance	Advance		Advance		Advance		Retreat		Retreat
-17.37			Advance	Advance	Advance	Advance	Advance	Retreat	Advance		Advance			Retreat	Retreat	Advance	Advance	Advance	Advance	Advance		Advance		Advance		Retreat		Retreat
-17.35			Advance	Advance	Advance	Advance	Advance	Retreat	Advance		Advance			Retreat	Advance	Advance	Advance	Advance	Advance	Advance		Advance		Advance		Advance		Retreat
-17.33			Advance	Retreat	Advance	Retreat	Advance	Retreat	Advance		Advance			Retreat	Retreat	Retreat	Retreat	Advance	Advance	Advance		Retreat		Retreat		Retreat		Retreat
-17.31			Advance	Retreat	Advance	Retreat	Advance	Retreat	Advance		Advance			Retreat	Retreat	Retreat	Retreat	Advance	Advance	Advance		Retreat		Retreat		Retreat		Retreat
-17.3			Advance	Retreat	Advance	Retreat	Advance	Retreat	Advance		Advance			Retreat	Retreat	Retreat	Retreat	Advance	Advance	Advance		Retreat		Retreat		Retreat		Retreat
-17.29			Advance	Advance	Advance	Retreat	Advance	Retreat	Advance		Advance			Retreat	Retreat	Retreat	Advance	Advance	Advance	Advance		Advance		Retreat		Retreat		Retreat
-17.27			Advance	Retreat	Advance	Retreat	Advance	Retreat	Advance		Advance			Retreat	Retreat	Retreat	Retreat	Advance	Advance	Advance		Retreat		Retreat		Retreat		Retreat
-17.25			Advance	Advance	Advance	Advance	Advance	Retreat	Advance		Advance			Retreat	Retreat	Advance	Advance	Advance	Advance	Advance		Advance		Advance		Retreat		Retreat
-17.23			Advance	Retreat	Advance	Retreat	Advance	Retreat	Advance		Advance			Retreat	Retreat	Retreat	Retreat	Advance	Advance	Advance		Retreat		Retreat		Retreat		Retreat
-17.21			Advance	Retreat	Advance	Retreat	Advance	Retreat	Advance		Advance			Retreat	Retreat	Retreat	Retreat	Advance	Advance	Advance		Retreat		Retreat		Retreat		Retreat
-17.2			Advance	Retreat	Advance	Retreat	Advance	Retreat	Advance		Advance			Retreat	Retreat	Retreat	Retreat	Advance	Advance	Advance		Retreat		Retreat		Retreat		Retreat
-17.19			Advance	Retreat	Advance	Retreat	Advance	Retreat	Advance		Advance			Retreat	Retreat	Retreat	Retreat	Retreat	Advance	Advance		Retreat		Retreat		Retreat		Retreat
-17.17			Advance	Retreat	Advance	Retreat	Advance	Retreat	Advance		Advance			Retreat	Retreat	Retreat	Retreat	Retreat	Advance	Advance		Retreat		Retreat		Retreat		Retreat
-17.15			Advance	Advance	Advance	Retreat	Advance	Retreat	Advance		Advance			Retreat	Retreat	Retreat	Advance	Advance	Advance	Advance		Advance		Retreat		Retreat		Retreat
-17.13			Advance	Retreat	Advance	Retreat	Advance	Retreat	Advance		Advance			Retreat	Retreat	Retreat	Retreat	Retreat	Advance	Advance		Retreat		Retreat		Retreat		Retreat
-17.11			Advance	Retreat	Advance	Retreat	Advance	Retreat	Advance		Advance			Retreat	Retreat	Retreat	Retreat	Retreat	Advance	Advance		Retreat		Retreat		Retreat		Retreat
-17.1			Advance	Retreat	Advance	Retreat	Advance	Retreat	Advance		Retreat				Retreat	Retreat	Retreat	Retreat	Retreat	Advance		Retreat		Retreat		Retreat		Retreat
-17.09			Advance	Retreat	Advance	Retreat	Advance	Retreat	Advance		Advance				Retreat	Retreat	Retreat	Retreat	Advance	Advance		Retreat		Retreat		Retreat		Retreat
-17.07			Advance	Retreat	Advance	Retreat	Advance	Retreat	Advance		Advance				Retreat	Retreat	Retreat	Retreat	Advance	Advance		Retreat		Retreat		Retreat		Retreat
-17.05			Advance	Retreat	Advance	Retreat	Advance	Retreat	Retreat		Retreat				Retreat	Retreat	Retreat	Retreat	Retreat	Retreat		Retreat		Retreat		Retreat		Retreat
-17.03			Advance	Retreat	Advance	Retreat	Advance	Retreat	Retreat		Retreat				Retreat	Retreat	Retreat	Retreat	Retreat	Advance		Retreat		Retreat		Retreat		Retreat
-17.01			Advance	Retreat	Advance	Retreat	Advance	Retreat	Retreat		Retreat				Retreat	Retreat	Retreat	Retreat	Retreat	Advance		Retreat		Retreat		Retreat		Retreat
-17			Advance	Retreat	Advance	Retreat	Advance	Retreat	Retreat		Retreat				Retreat	Retreat	Retreat	Retreat	Retreat	Advance		Retreat		Retreat		Retreat		Retreat
-16.99			Advance	Retreat	Advance	Retreat	Advance	Retreat	Advance		Advance				Retreat	Retreat	Advance	Advance	Advance	Advance		Advance		Retreat		Retreat		Retreat
-16.97			Advance	Retreat	Advance	Retreat	Advance	Retreat	Advance		Advance				Retreat	Retreat	Advance	Advance	Advance	Advance		Advance		Retreat		Retreat		Retreat
-16.95			Advance	Retreat	Advance	Retreat	Advance	Retreat	Advance		Advance				Retreat	Retreat	Advance	Advance	Advance	Advance		Advance		Retreat		Retreat		Retreat
-16.93			Advance	Retreat	Advance	Retreat	Advance	Retreat	Advance		Advance				Retreat	Retreat	Retreat	Advance	Advance	Advance		Retreat		Retreat		Retreat		Retreat
-16.91			Advance	Retreat	Advance	Retreat	Advance	Retreat	Advance		Advance				Retreat	Retreat	Retreat	Retreat	Advance	Advance		Retreat		Retreat		Retreat		Retreat
-16.9			Advance	Retreat	Advance	Retreat	Advance	Retreat	Advance		Advance				Retreat	Retreat	Retreat	Retreat	Advance	Advance		Retreat		Retreat		Retreat		Retreat
-16.89			Advance	Retreat	Advance	Retreat	Advance	Retreat	Advance		Retreat				Retreat	Retreat	Retreat	Retreat	Retreat	Advance		Retreat		Retreat		Retreat		Retreat
-16.87			Advance	Retreat	Advance	Retreat	Advance	Retreat	Advance		Advance				Retreat	Retreat	Retreat	Advance	Advance	Advance		Retreat		Retreat		Retreat		Retreat
-16.85			Advance	Retreat	Advance	Retreat	Advance	Retreat	Advance		Advance				Retreat	Retreat	Retreat	Advance	Advance	Advance		Retreat		Retreat		Retreat		Retreat
-16.83			Advance	Retreat	Advance	Retreat	Advance	Retreat	Advance		Advance				Retreat	Retreat	Retreat	Advance	Advance	Advance		Retreat		Retreat		Retreat		Retreat
-16.81			Advance	Retreat	Advance	Retreat	Advance	Retreat	Advance		Advance				Retreat	Retreat	Retreat	Retreat	Advance	Advance		Retreat		Retreat		Retreat		Retreat
-16.8			Advance	Retreat	Advance	Retreat	Advance	Retreat	Advance		Advance				Retreat	Retreat	Retreat	Retreat	Advance	Advance		Retreat		Retreat		Retreat		Retreat
-16.79			Advance	Retreat	Advance	Retreat	Advance		Advance		Advance				Retreat	Retreat	Advance	Advance	Advance	Advance		Advance		Retreat		Retreat		Retreat
-16.77			Advance	Retreat	Advance	Retreat	Advance		Retreat		Retreat				Retreat	Retreat	Retreat	Retreat	Retreat	Advance		Retreat		Retreat		Retreat		Retreat
-16.75			Advance	Retreat	Advance	Retreat	Advance		Advance		Retreat				Retreat	Retreat	Retreat	Retreat	Retreat	Advance		Retreat		Retreat		Retreat
-16.73			Advance	Retreat	Advance	Retreat	Advance		Advance		Retreat				Retreat	Retreat	Retreat	Retreat	Retreat	Advance		Retreat		Retreat		Retreat
-16.71			Advance	Retreat	Advance	Retreat	Advance		Retreat		Retreat				Retreat	Retreat	Retreat	Retreat	Retreat	Advance		Retreat		Retreat		Retreat
-16.7			Advance	Retreat	Advance	Retreat	Retreat		Retreat		Retreat				Retreat	Retreat	Retreat	Retreat	Retreat	Retreat		Retreat		Retreat		Retreat
-16.69			Advance	Retreat	Advance	Retreat	Advance		Advance		Retreat				Retreat	Retreat	Retreat	Retreat	Retreat	Advance		Retreat		Retreat		Retreat
-16.67			Advance	Retreat	Advance	Retreat	Retreat		Retreat		Retreat				Retreat	Retreat	Retreat	Retreat	Retreat	Retreat		Retreat		Retreat		Retreat
-16.65			Advance	Retreat	Advance	Retreat	Advance		Retreat		Retreat				Retreat	Retreat	Retreat	Retreat	Retreat	Retreat		Retreat		Retreat		Retreat
-16.63			Advance	Retreat	Advance	Retreat	Advance		Advance		Retreat				Retreat	Retreat	Retreat	Retreat	Advance	Advance		Retreat		Retreat		Retreat
-16.61			Advance	Retreat	Advance	Retreat	Retreat		Retreat		Retreat				Retreat	Retreat	Retreat	Retreat	Retreat	Retreat		Retreat		Retreat		Retreat
-16.6			Advance	Retreat	Advance	Retreat	Retreat		Retreat		Retreat				Retreat	Retreat	Retreat	Retreat	Retreat	Retreat		Retreat		Retreat		Retreat
-16.59			Advance	Retreat	Retreat	Retreat	Retreat		Retreat		Retreat				Retreat	Retreat	Retreat	Retreat	Retreat	Retreat		Retreat		Retreat		Retreat
-16.57			Advance	Retreat	Advance	Retreat	Advance		Retreat		Retreat				Retreat	Retreat	Retreat	Retreat	Retreat	Retreat		Retreat		Retreat		Retreat
-16.55			Advance	Retreat	Retreat	Retreat	Retreat		Retreat		Retreat				Retreat	Retreat	Retreat	Retreat	Retreat	Retreat		Retreat		Retreat		Retreat
-16.53			Advance	Retreat	Retreat	Retreat	Retreat		Retreat		Retreat				Retreat	Retreat	Retreat	Retreat	Retreat	Retreat		Retreat		Retreat		Retreat
-16.51			Advance	Retreat	Retreat	Retreat	Retreat		Retreat		Retreat				Retreat	Retreat	Retreat	Retreat	Retreat	Retreat		Retreat		Retreat		Retreat
-16.5			Advance	Retreat	Retreat	Retreat	Retreat		Retreat		Retreat				Retreat	Retreat	Retreat	Retreat	Retreat	Retreat		Retreat		Retreat		Retreat
-16.49			Advance	Retreat	Retreat	Retreat	Retreat		Retreat		Retreat				Retreat	Retreat	Retreat	Retreat	Retreat	Retreat		Retreat		Retreat		Retreat
-16.47			Retreat	Retreat	Retreat	Retreat	Retreat		Retreat		Retreat				Retreat	Retreat	Retreat	Retreat	Retreat	Retreat		Retreat		Retreat		Retreat
-16.45			Retreat	Retreat	Retreat	Retreat	Retreat		Retreat		Retreat				Retreat	Retreat	Retreat	Retreat	Retreat	Retreat		Retreat		Retreat		Retreat
-16.43			Advance	Retreat	Retreat	Retreat	Retreat		Retreat		Retreat				Retreat	Retreat	Retreat	Retreat	Retreat	Retreat		Retreat		Retreat		Retreat
-16.41			Retreat	Retreat	Retreat	Retreat	Retreat		Retreat		Retreat				Retreat	Retreat	Retreat	Retreat	Retreat	Retreat		Retreat		Retreat		Retreat
-16.4			Retreat	Retreat	Retreat	Retreat	Retreat		Retreat		Retreat				Retreat	Retreat	Retreat	Retreat	Retreat	Retreat		Retreat		Retreat		Retreat
-16.39			Advance	Retreat	Retreat	Retreat	Retreat		Retreat		Retreat				Retreat	Retreat	Retreat	Retreat	Retreat	Retreat		Retreat		Retreat		Retreat
-16.37			Advance	Retreat	Advance	Retreat	Retreat		Retreat		Retreat				Retreat	Retreat	Retreat	Retreat	Retreat	Retreat		Retreat		Retreat		Retreat
-16.35			Advance	Retreat	Retreat	Retreat	Retreat		Retreat		Retreat				Retreat	Retreat	Retreat	Retreat	Retreat	Retreat		Retreat		Retreat		Retreat
-16.33			Retreat	Retreat	Retreat	Retreat	Retreat		Retreat		Retreat					Retreat	Retreat	Retreat	Retreat	Retreat		Retreat		Retreat		Retreat
-16.31			Advance	Retreat	Advance	Retreat	Retreat		Retreat		Retreat					Retreat	Retreat	Retreat	Retreat	Retreat		Retreat		Retreat		Retreat
-16.3			Advance	Retreat	Advance	Retreat	Retreat		Retreat		Retreat					Retreat	Retreat	Retreat	Retreat	Retreat		Retreat		Retreat		Retreat
-16.29			Advance	Retreat	Advance	Retreat	Advance		Advance		Retreat					Retreat	Retreat	Retreat	Retreat	Advance		Retreat		Retreat		Retreat
-16.27			Advance	Retreat	Retreat	Retreat	Retreat		Retreat		Retreat					Retreat	Retreat	Retreat	Retreat	Retreat		Retreat		Retreat		Retreat
-16.25			Advance	Retreat	Retreat	Retreat	Retreat		Retreat		Retreat					Retreat	Retreat	Retreat	Retreat	Retreat		Retreat		Retreat		Retreat
-16.23			Advance	Retreat	Retreat	Retreat	Retreat		Retreat		Retreat					Retreat	Retreat	Retreat	Retreat	Retreat		Retreat		Retreat		Retreat
-16.21			Advance	Retreat	Retreat	Retreat	Retreat		Retreat		Retreat					Retreat	Retreat	Retreat	Retreat	Retreat		Retreat		Retreat		Retreat
-16.2			Advance	Retreat	Retreat	Retreat	Retreat		Retreat		Retreat					Retreat	Retreat	Retreat	Retreat	Retreat		Retreat		Retreat		Retreat
-16.19			Advance	Retreat	Retreat	Retreat	Retreat		Retreat		Retreat					Retreat	Retreat	Retreat	Retreat	Retreat		Retreat		Retreat		Retreat
-16.17			Advance	Retreat	Retreat	Retreat	Retreat		Retreat		Retreat					Retreat	Retreat	Retreat	Retreat	Retreat		Retreat		Retreat		Retreat
-16.15			Retreat	Retreat	Retreat	Retreat	Retreat		Retreat		Retreat					Retreat	Retreat	Retreat	Retreat	Retreat		Retreat		Retreat		Retreat
-16.13			Advance	Retreat	Advance		Advance		Retreat		Retreat					Retreat	Retreat	Retreat	Retreat	Retreat		Retreat		Retreat
-16.11			Advance	Retreat	Advance		Advance		Advance		Retreat					Retreat	Retreat	Retreat	Retreat	Advance		Retreat		Retreat
-16.1			Advance	Retreat	Advance		Advance		Advance		Retreat					Retreat	Retreat	Retreat	Retreat	Advance		Retreat		Retreat
-16.09			Advance	Retreat	Advance		Advance		Advance		Advance					Retreat	Retreat	Advance	Advance	Advance		Retreat		Retreat
-16.07			Advance	Retreat	Advance		Advance		Retreat		Retreat					Retreat	Retreat	Retreat	Retreat	Advance		Retreat		Retreat
-16.05			Advance	Retreat	Advance		Advance		Retreat		Retreat					Retreat	Retreat	Retreat	Retreat	Retreat		Retreat		Retreat
-16.03			Advance	Retreat	Advance		Advance		Advance		Advance					Retreat	Retreat	Retreat	Advance	Advance		Retreat		Retreat
-16.01			Advance	Retreat	Advance		Retreat		Retreat		Retreat					Retreat	Retreat	Retreat	Retreat	Retreat		Retreat		Retreat
-16			Advance	Retreat	Advance		Retreat		Retreat		Retreat					Retreat	Retreat	Retreat	Retreat	Retreat		Retreat		Retreat

## Sheet: (5) Timing summary
	Synchronous scenario			Asynchronous scenario
LGM JJA T anomaly	Timing of Maximum Extent (ka)			Timing of Maximum Extent (ka)
	Ih Artsan (South)	Jargalant (North)	Difference	Ih Artsan (South)	Jargalant (North)	Difference
-6℃	18.35	17.23	1.12	18.35	16	2.35
-5.9℃	17.89	17.89	0	17.89	16	1.89
-5.8℃	19.31	19.31	0	19.31	16.61	2.7
-5.7℃	19.79	19.79	0	19.79	16.71	3.08
-5.6℃	20.17	20.17	0	20.17	16.77	3.4
-5.5℃	20.23	20.23	0	20.23	17.13	3.1
-5.4℃	20.79	20.35	0.44	20.79	17.87	2.92
-5.3℃	20.8	20.8	0	20.8	18.35	2.45
-5.2℃	22	22	0	22	19.79	2.21
-5.1℃	22	22	0	22	20.01	1.99
-5.0℃	22	22	0	22	20.23	1.77
Asynchronous scenario: Considering that the present temperature of the north-facing slope is -0.5 ℃ colder than south-facing slope

## Sheet: (6) Melt_Synch
Name:			Ih Artsan	Jargalant
Present temperature (at headwall)			5.4 ℃	5.4 ℃
Elevation of the distal moraine:			3222.2 m	2997.2 m
Basal shear stress of initial glacier:			100 kPa	200 kPa
Time interval:			22-16 ka	22-16 ka
Melt along profile of Ih Artsan valley in synchronous scenario																Melt along profile of Jargalant valley in synchronous scenario
22-21 ka	21-20 ka	20-19 ka	19-18 ka	18-17 ka	17-16 ka	22-16 ka	Summer, 22 ka	Summer, 20 ka	Summer, 17 ka	Summer, the present day	June 21, 22 ka	June 21, 20 ka	June 21, 17 ka	June 21, present-day		22-21 ka	21-20 ka	20-19 ka	19-18 ka	18-17 ka	17-16 ka	22-16 ka	Summer, 22 ka	Summer, 20 ka	Summer, 17 ka	Summer, the present-day	June 21, 22 ka	June 21, 20 ka	June 21, 17 ka	June 21, the present-day
520.698	3539.78	13238.3	15018.5	21256.4	29514.2	81598.3	0	300.551	551.239	3815.02	0	3.56775	6.60956	45.2071		505.777	3438.58	12860.5	14590.6	20651.7	28675.5	79275.5	0	291.964	535.566	3705.29	0	3.45763	6.40432	43.8059
516.417	3510.65	13129.2	14894.4	21080.3	29268.4	80922.1	0	298.077	546.66	3783.97	0	3.54275	6.56351	44.8912		489.156	3325.66	12438	14110.8	19971.5	27729.6	76665.1	0	282.376	517.912	3585.31	0	3.36028	6.22684	42.5845
514.063	3494.59	13068.9	14825.7	20982.1	29131	80546	0	296.711	544.105	3766.69	0	3.52818	6.53587	44.7034		475.101	3230.17	12080.8	13705.1	19396.2	26928.8	74456.8	0	274.269	502.976	3483.49	0	3.2755	6.07138	41.5167
512.795	3485.9	13036.2	14788	20928.2	29055.1	80339.5	0	295.972	542.696	3757.19	0	3.51973	6.51901	44.5907		464.433	3157.69	11809.4	13396.6	18958.7	26320.1	72778.4	0	268.113	491.619	3406.16	0	3.21019	5.95111	40.6918
511.361	3476.12	12999.4	14745.8	20867.8	28970.4	80108.5	0	295.14	541.123	3746.63	0	3.51082	6.50155	44.4734		456.709	3105.33	11613.8	13174.6	18644.1	25882.6	71570.6	0	263.669	483.454	3350.52	0	3.16424	5.86706	40.114
508.145	3454.3	12917.8	14653.3	20736.7	28788.1	79605	0	293.288	537.721	3723.69	0	3.49337	6.47089	44.2596		449.862	3058.86	11440.1	12977.5	18364.9	25494.7	70498.9	0	259.725	476.212	3301.29	0	3.12474	5.79585	39.622
504.832	3431.85	12833.9	14558.2	20602.2	28601.4	79088.6	0	291.383	534.232	3700.15	0	3.47556	6.43999	44.0432		444.589	3023.11	11306.5	12826	18150.4	25196.6	69675.2	0	256.691	470.646	3263.31	0	3.09352	5.73906	39.2309
500.539	3403.01	12726.9	14437.8	20432.9	28367.9	78437.2	0	288.941	529.858	3670.43	0	3.45524	6.40772	43.81		440.873	2997.95	11212.6	12719.7	18000	24987.8	69097.5	0	254.556	466.747	3236.5	0	3.07078	5.69712	38.9434
496.063	3373.3	12617.6	14315.9	20262.8	28134.7	77780.6	0	286.436	525.474	3640.69	0	3.44014	6.3876	43.6545		439.998	2991.95	11190	12693.8	17963.2	24936.6	68956.6	0	254.046	465.79	3230.3	0	3.06697	5.69136	38.901
492.827	3352	12539.3	14227	20135.5	27954	77289.8	0	284.641	522.141	3619.38	0	3.43552	6.37095	43.566		443.686	3016.93	11283.3	12799.7	18113.3	25145.2	69532.7	0	256.165	469.685	3257.08	0	3.09065	5.73559	39.2029
493.951	3358.94	12562.7	14250.9	20165.9	27992.8	77411.8	0	285.209	522.895	3625.77	0	3.44069	6.37672	43.6097		450.325	3062	11451.9	12991.1	18384.4	25522	70573.3	0	259.992	476.719	3305.14	0	3.13122	5.80995	39.7138
494.316	3360.89	12568.5	14255.8	20171.2	27998.9	77435.8	0	285.362	523.017	3627.46	0	3.44071	6.37778	43.6122		459.645	3125.45	11689.5	13261.2	18767.6	26055.1	72043.3	0	265.381	486.666	3373.19	0	3.1912	5.92131	40.4755
495.094	3365.88	12586.6	14276.2	20200.2	28039.8	77548	0	285.779	523.775	3632.81	0	3.44452	6.38766	43.6725		472.962	3216.27	12030	13648.6	19316.9	26818.3	74149.4	0	273.101	500.917	3471.67	0	3.28514	6.09538	41.6779
496.33	3374.27	12618.3	14312.5	20252.3	28113	77747.2	0	286.494	525.133	3642.07	0	3.45241	6.40502	43.785		489.285	3326.67	12441.3	14113.2	19972.4	27726.8	76670	0	282.46	517.898	3588.69	0	3.38444	6.27396	42.9017
497.062	3379.42	12638.1	14335.8	20286.3	28161.5	77876.4	0	286.935	526.027	3648.06	0	3.45865	6.41965	43.8782		506.598	3444.19	12881	14612.7	20680.6	28712	79387.8	0	292.438	536.283	3713.61	0	3.48687	6.46137	44.1899
499.71	3397.79	12707.8	14416.1	20401.5	28323.4	78316.6	0	288.503	529.034	3668.39	0	3.47838	6.4595	44.1438		516.834	3513.99	13142.6	14910.4	21103.4	29301.2	81009.6	0	298.37	547.266	3789.11	0	3.55662	6.5927	45.084
502.633	3417.85	12783.4	14502.6	20524.9	28495.8	78788.9	0	290.212	532.243	3690.16	0	3.49832	6.49752	44.4018		525.641	3573.68	13365.2	15161.7	21457.2	29789.5	82369.3	0	303.432	556.415	3852.72	0	3.61441	6.69442	45.7927
507.193	3448.7	12898.5	14632.9	20709	28751.1	79496.2	0	292.828	537.016	3722.55	0	3.52305	6.54078	44.7038		533.563	3627.31	13565.5	15389.1	21779.6	30238	83606.9	0	307.983	564.783	3909.68	0	3.66087	6.78023	46.3805
513.713	3492.65	13062	14817.5	20969.4	29111.6	80497.4	0	296.552	543.758	3768.32	0	3.55612	6.59678	45.0993		535.531	3640.78	13616.2	15447	21862.1	30353.4	83923	0	309.129	566.931	3924.41	0	3.67527	6.8081	46.5685
519.75	3533.43	13214	14989.4	21212.1	29447.9	81430	0	300.009	550.046	3810.92	0	3.58762	6.65065	45.4783		529.175	3597.79	13455.7	15265	21604.2	29994.8	82932.7	0	305.482	560.238	3879.63	0	3.64484	6.75549	46.1997
526.246	3577.42	13378	15174.9	21474.1	29810.7	82436.4	0	303.741	556.831	3856.76	0	3.62127	6.70644	45.8757		522.446	3552.36	13286.3	15073.1	21332.6	29616.8	81888.7	0	301.63	553.19	3832.63	0	3.61481	6.70379	45.8418
532.297	3618.75	13533.2	15351.6	21724.9	30160	83398.3	0	307.255	563.346	3900.37	0	3.65409	6.76405	46.2783		516.013	3508.5	13121.3	14884.3	21062.8	29239.3	80856.1	0	297.9	546.163	3786.35	0	3.58291	6.64439	45.4314
536.487	3647.33	13640.6	15474.2	21899.5	30403.6	84067.1	0	309.685	567.886	3930.55	0	3.67627	6.80387	46.5543		510.315	3469.84	12976.8	14720.3	20830.4	28916	79963.7	0	294.618	540.13	3745.46	0	3.55085	6.58663	45.0323
538.021	3657.85	13680.2	15519.6	21964.6	30494.8	84315.8	0	310.581	569.58	3941.66	0	3.68418	6.81822	46.6535		498.764	3391.55	12684.4	14388.7	20360.6	28262.8	78159.8	0	287.976	527.94	3662.39	0	3.48339	6.46423	44.1887
539.589	3668.54	13720.3	15565.4	22029.8	30585.9	84565.8	0	311.489	571.277	3952.92	0	3.69221	6.83269	46.7535		487.129	3312.69	12390.1	14055.7	19890.4	27610.7	76352.8	0	281.285	515.754	3578.71	0	3.41183	6.33598	43.3064
540.765	3676.66	13751	15600.7	22080.4	30657.1	84759.4	0	312.181	572.6	3961.52	0	3.69807	6.84336	46.827		482.479	3280.8	12270.1	13918.9	19696.3	27341.7	75610	0	278.571	510.725	3543.14	0	3.37229	6.25985	42.7859
541.858	3684.25	13779.9	15633.9	22128.1	30724.5	84941.9	0	312.831	573.847	3969.61	0	3.70346	6.85315	46.8944		481.489	3274.34	12247.1	13894.3	19663.7	27298.1	75481	0	278.031	509.897	3535.91	0	3.35948	6.23766	42.6354
542.468	3688.33	13795.6	15652.5	22155.3	30763.1	85044.9	0	313.179	574.56	3974.1	0	3.70496	6.85818	46.9289		481.259	3272.49	12239.5	13885	19649.9	27279.4	75430.5	0	277.868	509.539	3532.89	0	3.34981	6.21758	42.4979
541.042	3678.54	13758.8	15610.9	22097.8	30685.4	84824.1	0	312.345	573.091	3963.61	0	3.69397	6.84373	46.8098		482.741	3282.34	12275.9	13925.8	19707.2	27358.4	75651.2	0	278.7	511.02	3542.5	0	3.35235	6.21919	42.516
539.546	3668.31	13720.4	15567.1	22035.5	30599.2	84586	0	311.475	571.472	3952.6	0	3.6839	6.82493	46.6815		485.606	3301.72	12348.2	14007.8	19823.2	27519.5	76096.8	0	280.344	514.029	3562.83	0	3.36732	6.24543	42.6991
537.223	3652.56	13661.4	15500.2	21940.5	30467.1	84221.6	0	310.138	569.008	3936.01	0	3.67142	6.80264	46.5269		495.214	3367.1	12593	14286.1	20217.9	28068.8	77611.3	0	285.897	524.277	3632.72	0	3.42734	6.35631	43.4587
534.898	3636.8	13602.5	15433.4	21845.9	30335.5	83858.3	0	308.801	566.551	3919.5	0	3.65959	6.78181	46.3818		507.781	3452.5	12912.6	14649.2	20733.2	28786.2	79588.7	0	293.149	537.658	3723.73	0	3.50329	6.49544	44.4147
532.928	3623.46	13552.7	15376.9	21765.9	30224.3	83551.1	0	307.669	564.476	3905.55	0	3.64975	6.76461	46.2618		516.037	3508.8	13123.7	14888.8	21071.7	29254.9	80887.2	0	297.933	546.424	3784.42	0	3.55996	6.59677	45.1207
529.766	3602.05	13472.8	15286.2	21637.5	30046	83058.2	0	305.853	561.146	3883.16	0	3.63381	6.73666	46.0668		521.922	3548.35	13270.2	15053.6	21303.6	29575.7	81780.4	0	301.28	552.427	3826.22	0	3.59601	6.66281	45.5706
527.044	3583.61	13403.9	15208.1	21526.8	29892.2	82633.2	0	304.288	558.274	3863.76	0	3.61941	6.71114	45.8894		524.946	3569.01	13347.8	15142.2	21429.7	29751.6	82263.6	0	303.037	555.705	3848.88	0	3.61893	6.70752	45.8713
525.892	3575.89	13375.2	15175.7	21481.1	29827.3	82455.9	0	303.634	557.081	3855.93	0	3.61553	6.70426	45.8462		525.015	3569.62	13350.4	15145.6	21435	29759.5	82283	0	303.092	555.847	3850.1	0	3.62351	6.71788	45.9379
525.477	3573.19	13365.4	15164.2	21462.9	29799.7	82386.9	0	303.408	556.586	3853.24	0	3.61668	6.70049	45.8377		521.014	3542.55	13249.4	15031	21272.8	29534	81660	0	300.795	551.638	3821.83	0	3.60368	6.68332	45.6963
524.561	3567.04	13341.7	15136.3	21422.4	29742.1	82232.9	0	302.882	555.522	3846.44	0	3.61328	6.69121	45.7745		513.574	3492.23	13061.6	14817.7	20969.8	29111.2	80496.6	0	296.527	543.763	3769.09	0	3.56673	6.61485	45.2301
526.466	3579.81	13389.1	15189.7	21497.5	29846	82522.1	0	303.963	557.468	3859.76	0	3.62338	6.7092	45.8993		503.016	3420.34	12791.8	14510.5	20533.2	28502.7	78822.5	0	290.418	532.418	3693	0	3.50879	6.51052	44.5072
528.36	3592.52	13436.3	15243.1	21573	29950.5	82812	0	305.039	559.421	3873.08	0	3.63342	6.72714	46.0235		491.697	3343.46	12504.2	14183.7	20069.7	27857.6	77043.8	0	283.89	520.385	3611.72	0	3.44529	6.39613	43.7168
530.361	3605.91	13485.9	15298.9	21651.4	30058.6	83113.8	0	306.171	561.447	3887.04	0	3.64397	6.74587	46.1534		480.6	3268.13	12222.4	13863.7	19616	27226.4	75302.5	0	277.494	508.608	3531.99	0	3.38214	6.28209	42.9294
533.531	3627.06	13564.2	15386.6	21774.6	30229.1	83589	0	307.96	564.636	3909.09	0	3.66064	6.77601	46.3604		470.579	3200.09	11967.9	13574.6	19205.9	26655.8	73728.7	0	271.718	497.961	3459.98	0	3.32508	6.17903	42.2178
536.312	3645.75	13633.8	15465.8	21887	30385.9	84020.7	0	309.543	567.557	3928.83	0	3.67582	6.80495	46.556		461.919	3141.3	11748	13324.7	18851.3	26162	72367.8	0	266.726	488.753	3397.79	0	3.27652	6.09145	41.6128
537.885	3656.49	13674.2	15512.1	21953.2	30478.8	84274.1	0	310.457	569.282	3940.38	0	3.68539	6.824	46.6832		455.07	3094.8	11574	13127.2	18571.5	25772.9	71293.8	0	262.778	481.492	3348.53	0	3.23783	6.02148	41.1298
539.057	3664.49	13704.4	15546.6	22002.7	30548.3	84463.6	0	311.137	570.574	3949.04	0	3.69271	6.83838	46.7798		450.323	3062.53	11453.2	12989.9	18376.8	25502.1	70546.8	0	260.037	476.438	3314.28	0	3.21031	5.97149	40.7852
540.76	3676.09	13747.9	15596.2	22073.4	30647.2	84734.6	0	312.123	572.413	3961.41	0	3.70251	6.85662	46.9045		543.925	3697.06	13827.2	15689.5	22212.4	30851.1	85264.9	0	313.904	576.118	3973.57	0	3.6271	6.69807	45.8628
543.854	3696.97	13825.6	15684.1	22197.3	30818.6	85210.9	0	313.893	575.621	3982.83	0	3.71606	6.87796	47.0594		538.647	3661.12	13692.3	15535.5	21992.9	30544	84423.6	0	310.85	570.405	3936.03	0	3.60156	6.65306	45.5492
548.127	3726.05	13934.5	15807.7	22372.7	31062.7	85883.9	0	316.363	580.175	4013.05	0	3.7363	6.91198	47.3007		455.035	3094.14	11571.1	13123.9	18567.9	25770.4	71281	0	262.716	481.418	3345.69	0	3.21977	5.98365	40.88
551.511	3749.15	14021.3	15906.8	22513.7	31259.5	86424.3	0	318.328	583.841	4037.22	0	3.75223	6.93978	47.4953		447.873	3045.77	11390.4	12918.3	18274.9	25359.8	70156.1	0	258.612	473.789	3295.98	0	3.19224	5.93746	40.5532
551.15	3746.57	14011.3	15895.2	22497	31236.2	86361	0	318.105	583.407	4034.54	0	3.75108	6.93816	47.4827		450.026	3060.38	11445	12980.4	18363.1	25482.6	70494.3	0	259.853	476.078	3311.58	0	3.20554	5.96178	40.7204
552.201	3753.63	14037.6	15925.1	22539.5	31295.5	86524.1	0	318.703	584.513	4041.98	0	3.7566	6.94835	47.5524		451.118	3067.81	11472.8	13012	18408	25545.2	70666.6	0	260.484	477.245	3319.54	0	3.21257	5.9747	40.8091
554.375	3768.43	14093.1	15988.3	22629.4	31420.8	86868.7	0	319.961	586.847	4057.4	0	3.76658	6.96563	47.6736		451.551	3070.76	11483.8	13024.5	18425.7	25570	70734.8	0	260.734	477.707	3322.71	0	3.21544	5.98002	40.8456
556.532	3783.34	14149.7	16053.4	22722.8	31551.9	87225.5	0	321.234	589.284	4072.87	0	3.77472	6.97941	47.7715		452.059	3074.23	11496.8	13039.3	18446.7	25599.2	70815.2	0	261.029	478.25	3326.51	0	3.21929	5.98726	40.8949
558.402	3796.26	14199.1	16110.8	22806	31670	87542.6	0	322.339	591.464	4086.42	0	3.77985	6.98956	47.8429		451.314	3069.19	11478	13018	18416.4	25557.1	70699.1	0	260.601	477.465	3321.22	0	3.21537	5.98031	40.8466
558.113	3794.2	14191.1	16102	22794.6	31655.7	87498.7	0	322.161	591.186	4084.04	0	3.77481	6.98432	47.7933		448.822	3052.28	11414.8	12946.2	18314.8	25415.7	70308.8	0	259.166	474.827	3303.27	0	3.20074	5.95379	40.6638
557.185	3787.88	14167.4	16075	22756.1	31602.6	87351.8	0	321.624	590.187	4077.37	0	3.76964	6.97498	47.7288		532.39	3618.54	13532.5	15353.3	21733.3	30181.2	83428.4	0	307.231	563.65	3891.54	0	3.5718	6.59992	45.1808
556.382	3782.44	14147.1	16051.9	22723.3	31556.8	87225.7	0	321.162	589.333	4071.72	0	3.76595	6.96858	47.684		560.696	3810.2	14249.6	16169.2	22894.1	31802.6	87882.4	0	323.499	593.841	4088.08	0	3.67767	6.7756	46.4306
555.574	3776.99	14126.8	16028.9	22690.7	31511.1	87100.2	0	320.701	588.488	4066.19	0	3.76335	6.96454	47.6545		450.341	3062.79	11455	12993.2	18383.5	25514.7	70571	0	260.065	476.641	3313.25	0	3.19758	5.94584	40.615
554.611	3770.51	14102.6	16001.5	22651.8	31456	86950	0	320.152	587.469	4059.63	0	3.76039	6.9588	47.6216		443.45	3015.87	11278.7	12791.9	18096.2	25111.9	69469.5	0	256.076	469.155	3264.66	0	3.16917	5.89666	40.2698
553.564	3763.45	14076.3	15971.7	22608.9	31395.6	86785.3	0	319.553	586.348	4052.41	0	3.75683	6.95135	47.5763		446.752	3038.29	11362.6	12887.1	18231.1	25299.6	69987.6	0	257.98	472.658	3288.51	0	3.18891	5.93259	40.5172
553.131	3760.61	14065.5	15958.5	22589	31366.7	86710.6	0	319.312	585.82	4049.35	0	3.75785	6.94969	47.5647		449.12	3054.37	11422.8	12955.4	18327.9	25434.1	70359	0	259.345	475.169	3305.6	0	3.20303	5.95827	40.6941
552.682	3757.34	14052.6	15943.2	22566.5	31334.4	86625.5	0	319.028	585.227	4045.82	0	3.75655	6.94736	47.5485		450.687	3065.03	11462.7	13000.8	18392.3	25523.7	70606	0	260.25	476.841	3316.91	0	3.21199	5.97454	40.8063
551.999	3752.56	14034.4	15922	22535.7	31290.6	86508.1	0	318.62	584.418	4040.8	0	3.75403	6.94288	47.5173		451.605	3071.29	11486.2	13027.5	18430.3	25576.6	70751.7	0	260.782	477.828	3323.48	0	3.21648	5.98257	40.862
551.231	3747.2	14013.9	15898.2	22501.3	31242.2	86377.3	0	318.161	583.52	4035.18	0	3.75112	6.93794	47.4821		452.269	3075.8	11503	13046.6	18457.3	25614.2	70855.5	0	261.165	478.529	3328.18	0	3.21925	5.98739	40.8958
549.721	3736.77	13974.5	15853.3	22437.5	31153.3	86132.8	0	317.272	581.861	4024.41	0	3.74488	6.92808	47.4102		453.703	3085.53	11539.4	13088	18516.1	25696.2	71081.1	0	261.991	480.056	3338.43	0	3.22668	6.00067	40.9878
547.412	3721.15	13916.2	15787.3	22344.3	31024.2	85774.8	0	315.947	579.447	4008.54	0	3.73579	6.91472	47.3105		462.169	3143	11754.4	13332.2	18862.3	26177.9	72409.9	0	266.871	489.044	3399.39	0	3.27587	6.08979	41.6026
544.899	3704.31	13853.7	15716.8	22245	30887.1	85393	0	314.522	576.878	3991.61	0	3.72701	6.90249	47.2175		470.102	3196.86	11955.9	13561	19186.8	26629.4	73655.2	0	271.444	497.468	3456.47	0	3.32167	6.17269	42.1745
543.142	3692.55	13810.1	15667.7	22175.8	30791.3	85126.6	0	313.527	575.085	3979.75	0	3.72095	6.89375	47.152		477.501	3247.1	12143.8	13774.4	19489.4	27050.4	74816.6	0	275.708	505.323	3509.68	0	3.3641	6.24941	42.704
541.688	3682.75	13773.6	15626.4	22117.4	30710.3	84902.2	0	312.696	573.571	3969.62	0	3.71447	6.88292	47.0752		485.27	3299.87	12341.3	13998.9	19807.8	27493.7	76038.6	0	280.19	513.591	3565.3	0	3.40647	6.32546	43.2302
540.085	3671.87	13732.9	15580.1	22051.8	30619.1	84650.6	0	311.772	571.87	3958.12	0	3.70568	6.86713	46.9659		491.507	3342.48	12501.3	14181.3	20067.4	27856	77033.6	0	283.813	520.34	3610.28	0	3.43965	6.38446	43.6399
538.791	3662.92	13699.1	15541.3	21996.4	30541.2	84438.3	0	311.009	570.426	3948.17	0	3.6955	6.84687	46.8304		496.221	3374.18	12619.5	14315.5	20258.3	28122.8	77766.8	0	286.5	525.305	3643.15	0	3.45902	6.42045	43.8853
538.543	3661.03	13691.5	15532.1	21982.3	30520.2	84385.3	0	310.845	570.047	3945.51	0	3.69051	6.83498	46.755		494.979	3365.57	12586.9	14278.2	20205.1	28048.6	77563.4	0	285.766	523.922	3633.13	0	3.44561	6.39276	43.7024
537.928	3656.76	13675.2	15513	21954.4	30480.2	84278.9	0	310.479	569.312	3940.58	0	3.68522	6.82318	46.6788		492.006	3345.74	12514.1	14197.4	20092.9	27894.5	77128.6	0	284.092	521.03	3611.79	0	3.422	6.34971	43.415
536.682	3648.33	13643.7	15477.4	21904	30410.4	84085.5	0	309.764	568.006	3931.81	0	3.67913	6.81301	46.6065		488.382	3320.85	12420.4	14090.3	19940.8	27683.8	76547.1	0	281.973	517.089	3584.19	0	3.39153	6.29321	43.0194
535.389	3639.63	13611.4	15441	21852.8	30339.7	83888.6	0	309.027	566.683	3922.91	0	3.67344	6.80426	46.5425		483.464	3287.32	12294.6	13947.3	19737.8	27401.1	75768.4	0	279.124	511.816	3548.09	0	3.35871	6.23179	42.6004
534.59	3634.36	13592.1	15419.7	21823.6	30300.1	83775.2	0	308.583	565.933	3917.87	0	3.67179	6.8037	46.533		480.069	3264.18	12207.9	13848.6	19597.7	27206.2	75231.2	0	277.157	508.18	3523.11	0	3.33592	6.18897	42.3086
536.356	3646.53	13638.1	15472.4	21899.1	30406.4	84064.3	0	309.62	567.904	3931.28	0	3.68475	6.82923	46.7044		481	3270.47	12231.3	13874.9	19634.8	27257.5	75373.9	0	277.691	509.139	3529.18	0	3.33692	6.18813	42.3091
538.113	3658.6	13683.6	15524.4	21973.2	30510.2	84348.4	0	310.649	569.834	3944.53	0	3.69759	6.85412	46.8723		485.32	3299.79	12341	13999.6	19811.7	27503.5	76052.5	0	280.18	513.73	3560.82	0	3.36593	6.24304	42.6822
539.757	3669.9	13726.1	15573.1	22042.5	30606.9	84613.7	0	311.611	571.635	3956.92	0	3.70983	6.87768	47.0317		489.441	3327.98	12446.9	14120.3	19983.2	27742.5	76709.9	0	282.578	518.186	3591.53	0	3.39599	6.3005	43.0715
539.281	3666.75	13713.9	15557.9	22018.4	30569.1	84522.3	0	311.341	570.974	3953.59	0	3.71243	6.87545	47.0342		493.949	3358.72	12562.2	14251.5	20169.5	28002.1	77424.5	0	285.19	523.027	3624.63	0	3.42612	6.35681	43.4558
538.541	3661.25	13692.1	15531.6	21979.4	30512.8	84375.2	0	310.863	569.939	3947.4	0	3.70717	6.86551	46.9655		497.866	3385.34	12661.8	14364.8	20330.3	28225.9	78041.3	0	287.451	527.201	3653.1	0	3.45052	6.40174	43.764
538.244	3659.07	13683.6	15521.9	21965.6	30493.6	84322.7	0	310.675	569.582	3945.06	0	3.70492	6.86255	46.942		496.146	3373.73	12618.5	14315.8	20261	28129.8	77775.1	0	286.466	525.405	3641.07	0	3.4427	6.38847	43.6704
538.197	3659.11	13684.6	15523.7	21968.8	30498.4	84333.3	0	310.686	569.669	3945.31	0	3.70607	6.86342	46.952		494.56	3363	12578.5	14270.4	20196.8	28040.4	77528.4	0	285.556	523.74	3629.85	0	3.43475	6.3746	43.5734
538.705	3662.81	13699.7	15543.2	22000.3	30548.1	84451.3	0	311.01	570.541	3949.58	0	3.70514	6.86982	46.976		493.304	3354.49	12546.7	14234.4	20145.7	27969.1	77332	0	284.834	522.414	3620.88	0	3.42787	6.36232	43.4883
540.985	3677.82	13754.8	15604.7	22086.2	30666.3	84783.1	0	312.274	572.757	3963.92	0	3.70752	6.86854	46.9801		493.385	3355.13	12549.2	14237	20148.4	27971.3	77342.5	0	284.89	522.467	3621.75	0	3.4312	6.36475	43.518
542.394	3687.11	13788.9	15642.6	22138.9	30738	84986.5	0	313.057	574.111	3972.77	0	3.7099	6.86865	46.9907		496.619	3377.08	12630.8	14328.8	20277.9	28150.9	77841	0	286.75	525.822	3644.88	0	3.45114	6.39954	43.7569
543.406	3693.94	13814.2	15670.9	22178.3	30791.7	85138.2	0	313.635	575.124	3979.44	0	3.71284	6.87087	47.0136		501.86	3412.41	12762.4	14477.8	20488.3	28442.7	78649.7	0	289.745	531.275	3682.32	0	3.48167	6.45537	44.1407
544.157	3699.27	13834.6	15694.5	22211.9	30838.7	85266.6	0	314.093	575.999	3985.02	0	3.71584	6.87489	47.0454		506.288	3442.31	12873.8	14603.7	20666.1	28689.2	79333.1	0	292.28	535.882	3714.18	0	3.5087	6.50562	44.4842
544.716	3703.36	13850.8	15713.8	22240.7	30880.3	85375.1	0	314.447	576.762	3989.46	0	3.71799	6.87888	47.0732		510.117	3468.27	12970.9	14713.9	20822.3	28906.5	79932.7	0	294.483	539.937	3742	0	3.53291	6.55083	44.7928
545.48	3708.74	13871.9	15739.1	22278.1	30934	85516.3	0	314.911	577.748	3995.42	0	3.72006	6.88467	47.1127		513.372	3490.45	13054	14808.4	20956.5	29093.1	80447.2	0	296.367	543.419	3765.82	0	3.55392	6.59019	45.0611
546.591	3716.15	13899.4	15770.6	22324.2	31000.3	85693	0	315.537	578.967	4002.96	0	3.72177	6.89257	47.1504		514.838	3500.42	13091.3	14850.9	21016.6	29176.9	80678.1	0	297.214	544.982	3776.45	0	3.56277	6.60646	45.1728
547.914	3725.12	13932.9	15808.7	22378.2	31075.4	85900.2	0	316.299	580.368	4012.33	0	3.72835	6.90387	47.231		516.267	3510.13	13127.7	14892.2	21075.4	29258.6	80903.4	0	298.04	546.506	3786.8	0	3.57139	6.6223	45.2815
548.54	3729.52	13949.2	15826.3	22401.3	31105.1	85990.4	0	316.673	580.944	4016.95	0	3.73625	6.91152	47.2993		517.76	3520.3	13165.8	14935.6	21136.9	29344.4	81139.5	0	298.904	548.105	3797.68	0	3.58073	6.63964	45.4001
548.68	3730.09	13950.4	15826.6	22400.4	31101.9	85988.4	0	316.713	580.901	4017.35	0	3.73789	6.91422	47.3184		520.494	3538.92	13235.6	15015	21249.7	29501.4	81571.9	0	300.485	551.034	3817.55	0	3.59754	6.6707	45.6129
549.176	3733.26	13961.7	15838.8	22416.9	31124.4	86053.2	0	316.977	581.324	4020.59	0	3.74111	6.92016	47.3586		524.57	3566.58	13339.1	15132.6	21416.5	29733.7	82212.2	0	302.834	555.367	3846.83	0	3.62057	6.71235	45.9003
550.721	3743.59	14000.1	15882.4	22478.8	31210.7	86291.1	0	317.851	582.933	4031.47	0	3.74937	6.93551	47.4632		526.847	3582.12	13397.3	15199	21511	29865.7	82574.5	0	304.154	557.824	3863.64	0	3.636	6.7415	46.0985
551.197	3746.78	14012	15895.9	22498.1	31238	86365.3	0	318.122	583.438	4035.02	0	3.7528	6.94285	47.511		526.032	3576.75	13377.5	15176.2	21477.8	29818	82447	0	303.702	556.948	3858.43	0	3.63671	6.74041	46.0977
549.551	3735.66	13970.5	15848.8	22431.6	31145.9	86110	0	317.178	581.715	4023.72	0	3.74638	6.9333	47.4401		525.116	3570.37	13353	15147.8	21436.8	29760	82290.8	0	303.155	555.875	3851.62	0	3.63234	6.73271	46.0435
547.465	3721.71	13918.7	15790.6	22349.6	31032.6	85794.5	0	315.998	579.592	4009.84	0	3.74002	6.92543	47.3772		523.806	3561.46	13319.6	15109.8	21382.8	29684.6	82083.5	0	302.398	554.47	3842.22	0	3.62531	6.72017	45.9566
545.992	3712.01	13883.2	15750.9	22294	30956.1	85579.9	0	315.181	578.157	4000.64	0	3.73873	6.92697	47.3788		522.076	3549.75	13276	15060.3	21312.8	29587.6	81814.9	0	301.405	552.658	3829.84	0	3.61553	6.70248	45.8345
545.062	3705.98	13861.2	15726.5	22259.1	30906	85444	0	314.675	577.239	3995.15	0	3.7405	6.92965	47.4076		518.439	3525.1	13183.9	14955.9	21165	29382.1	81247.2	0	299.313	548.822	3803.78	0	3.59513	6.6657	45.5805
542.849	3691.04	13805.4	15662.7	22168.1	30778.8	85095.6	0	313.408	574.872	3979.43	0	3.7304	6.90952	47.2686		511.15	3475.64	12998.9	14745.9	20867.4	28967.9	80104.5	0	295.114	541.097	3751.46	0	3.5541	6.59178	45.0697
540.184	3672.89	13736.9	15584	22055.6	30620.9	84664.9	0	311.863	571.939	3960.06	0	3.71716	6.88399	47.0931		503.126	3421.24	12795.6	14515.2	20540.4	28513.2	78849.3	0	290.498	532.61	3693.8	0	3.50785	6.50812	44.4925
537.049	3651.28	13655.2	15490.2	21921	30431.7	84150.1	0	310.021	568.426	3937.03	0	3.69985	6.85215	46.8742		495.481	3369.41	12602.3	14296.4	20231	28083.9	77660.6	0	286.1	524.589	3638.95	0	3.46165	6.42562	43.9243
534.707	3635.07	13593.8	15419.8	21820.6	30291.7	83766.4	0	308.638	565.816	3919.75	0	3.68607	6.82826	46.7058		487.028	3311.95	12387.2	14052.3	19885.9	27605.5	76336.3	0	281.221	515.647	3577.71	0	3.40955	6.33311	43.2774
535.266	3638.86	13608	15435.9	21843.4	30323.5	83854.1	0	308.959	566.409	3923.75	0	3.68903	6.83373	46.7433		477.988	3250.58	12157.8	13792	19517.3	27093.6	74921.4	0	276.011	506.085	3512.43	0	3.35538	6.23458	42.5988
535.785	3642.37	13621.1	15450.9	21864.7	30353.1	83935.6	0	309.258	566.962	3927.46	0	3.6918	6.83879	46.778		469.315	3191.77	11938.1	13543	19164.6	26603	73566.7	0	271.021	496.933	3450.06	0	3.30466	6.14161	41.9671
535.389	3639.67	13611	15439.4	21848.5	30330.8	83873.7	0	309.028	566.544	3924.63	0	3.68956	6.83535	46.7524		470.702	3201.08	11972.7	13582	19219.8	26680.5	73779.8	0	271.809	498.371	3459.54	0	3.30996	6.15116	42.0261
534.389	3632.94	13586.1	15411.3	21808.9	30275.8	83720.9	0	308.458	565.515	3917.7	0	3.68487	6.82762	46.698		473.067	3217.08	12032.4	13649.5	19315.3	26813	74146.7	0	273.166	500.847	3476.34	0	3.3227	6.1735	42.182
534.419	3633.18	13587	15412.4	21810.4	30277.9	83726.8	0	308.479	565.556	3918.03	0	3.68581	6.82957	46.7109		476.703	3241.75	12124.5	13754	19463.2	27018.3	74714.5	0	275.259	504.681	3502.54	0	3.34417	6.21232	42.4499
534.176	3631.54	13580.9	15405.5	21800.6	30264.3	83689.1	0	308.34	565.302	3916.33	0	3.68484	6.82792	46.6993		482.676	3282.25	12275.8	13925.6	19706.1	27355.6	75647.1	0	278.696	510.98	3545.51	0	3.37914	6.27549	42.8861
532.401	3619.49	13535.9	15354.3	21728.1	30163.2	83410.6	0	307.318	563.417	3903.68	0	3.67559	6.81143	46.5849		491.155	3339.89	12491.5	14170.5	20053.1	27837.8	76978.6	0	283.591	519.983	3607.12	0	3.43199	6.37283	43.5536
529.773	3601.68	13469.3	15278.7	21620.9	30014	82999.1	0	305.806	560.635	3884.97	0	3.66214	6.78752	46.419		498.2	3387.84	12671.1	14374.7	20342.1	28238.6	78087	0	287.665	527.476	3658.49	0	3.47697	6.45405	44.1205
529.394	3599.13	13459.8	15268	21605.8	29993.1	82941	0	305.59	560.243	3882.34	0	3.66065	6.78502	46.4013		503.131	3421.24	12795.6	14515.1	20540.1	28512.6	78848.1	0	290.497	532.6	3693.82	0	3.5081	6.50868	44.4961
528.164	3590.76	13428.4	15232.3	21555	29922.3	82746.3	0	304.879	558.924	3873.47	0	3.65355	6.77214	46.3124		507.29	3449.34	12900.2	14633.5	20707.5	28745.2	79491.8	0	292.879	536.943	3723.71	0	3.53326	6.55472	44.8124
526.824	3581.63	13394.2	15193.3	21499.5	29845.1	82533.7	0	304.102	557.483	3863.75	0	3.64524	6.75691	46.2078		512.577	3485.18	13034.1	14785.4	20922.6	29044.2	80317.7	0	295.92	542.524	3761.69	0	3.56366	6.60974	45.1919
525.512	3572.66	13360.5	15155	21445.3	29769.9	82325.9	0	303.34	556.078	3854.08	0	3.63629	6.74023	46.0938		518.708	3526.8	13189.8	14962.1	21173.2	29392.8	81279.6	0	299.454	549.027	3805.67	0	3.59771	6.67089	45.615
529.218	3598.59	13460	15271.5	21615.6	30012.3	82972.4	0	305.561	560.552	3882.19	0	3.65574	6.78135	46.3702		524.104	3563.42	13326.8	15117.7	21393.6	29699.4	82125.8	0	302.563	554.75	3844.33	0	3.62743	6.72424	45.9841
532.935	3622.97	13549.1	15370.2	21752.3	30199.8	83502.9	0	307.613	564.073	3905.37	0	3.66028	6.78083	46.3799		527.857	3588.82	13421.6	15225.1	21545.8	29910.8	82710	0	304.717	558.696	3871.2	0	3.64869	6.76281	46.2498
536.966	3650.49	13652.1	15487	21917.3	30428.2	84136.2	0	309.952	568.346	3933.81	0	3.67879	6.80841	46.5854		531.35	3612.51	13510.1	15325.7	21688.3	30109.1	83257.2	0	306.728	562.396	3896.17	0	3.66763	6.7968	46.485
538.657	3662.05	13695.6	15536.8	21988.3	30527.3	84407.9	0	310.935	570.193	3946.01	0	3.68755	6.82415	46.6946		534.945	3636.95	13601.7	15429.7	21836	30314.8	83823.8	0	308.804	566.232	3921.84	0	3.68618	6.82961	46.7132
539.679	3668.95	13721.4	15565.9	22029.6	30584.7	84566.3	0	311.52	571.262	3953.24	0	3.69286	6.83368	46.7604		529.297	3598.65	13458.5	15267.3	21605.7	29994.4	82939.6	0	305.554	560.254	3881.5	0	3.65576	6.77507	46.3358
540.896	3677.21	13752.3	15601.1	22079.5	30654.3	84757.9	0	312.221	572.559	3961.92	0	3.69912	6.8449	46.838		518.833	3527.61	13192.7	14965.3	21177.5	29398.6	81296.4	0	299.521	549.138	3806.58	0	3.59898	6.67349	45.6321
542.751	3689.81	13799.5	15654.7	22155.8	30760.6	85050.6	0	313.291	574.543	3975.13	0	3.70857	6.86183	46.9553		507.375	3449.85	12901.9	14635.2	20709.5	28747.6	79500	0	292.92	536.991	3724.41	0	3.53506	6.55836	44.8366
543.889	3697.42	13827.7	15686.4	22200.5	30822.6	85222.7	0	313.935	575.701	3983.07	0	3.71454	6.8726	47.0294		496.416	3375.56	12624.4	14320.4	20263.7	28127.8	77788.2	0	286.616	525.424	3645.52	0	3.47064	6.44152	44.0312
543.516	3694.68	13817	15674.1	22182.8	30798	85155.5	0	313.698	575.24	3980.22	0	3.7134	6.87187	47.0205		483.868	3290.44	12306.3	13959.5	19752.4	27417.3	75825.4	0	279.391	512.159	3555.1	0	3.39595	6.30582	43.0962
541.813	3683.23	13774.5	15626.5	22116.4	30707.1	84899.7	0	312.729	573.531	3968.91	0	3.70803	6.86645	46.9727		470.457	3199.46	11966.3	13573.9	19206.8	26659.7	73730.6	0	271.67	498.01	3458.32	0	3.31516	6.15888	42.0841
541.087	3678.57	13757.8	15608.1	22091.3	30673.7	84802.5	0	312.34	572.892	3964.9	0	3.70925	6.8724	47.005		459.808	3127.34	11697.4	13269.6	18777	26063.7	72078.9	0	265.553	486.872	3381.46	0	3.24888	6.03781	41.2518
541.884	3684.18	13779.2	15632.9	22126.9	30723.9	84938.5	0	312.82	573.822	3971.47	0	3.7178	6.89014	47.1222		450.604	3064.74	11463.2	13004.1	18401.7	25543.8	70638.4	0	260.237	477.149	3314.41	0	3.18824	5.93025	40.5032
543.326	3694.12	13816.7	15675.8	22188.1	30809.2	85172.5	0	313.666	575.413	3982.44	0	3.72915	6.9122	47.2709		442.354	3008.72	11253.8	12766.5	18065.5	25077	69347.8	0	255.482	468.431	3254.65	0	3.13688	5.8366	39.8587
544.526	3702.42	13847.7	15710.4	22235.3	30871.9	85354.1	0	314.374	576.613	3991.24	0	3.73961	6.92457	47.3731		436.01	2965.83	11093.6	12584.8	17807.5	24717.5	68357.3	0	251.844	461.728	3209.16	0	3.10128	5.76882	39.4002
545.19	3706.44	13861.4	15724.3	22253	30894.1	85424.9	0	314.702	577.049	3994.99	0	3.74206	6.92818	47.3994		431.897	2937.78	10988.4	12464.9	17637.1	24479.7	67703.6	0	249.459	457.298	3179.37	0	3.07801	5.72689	39.1105
546.294	3713.73	13888.3	15754.7	22296.2	30954.4	85591.2	0	315.318	578.173	4002.56	0	3.74695	6.93814	47.4648		432.809	2943.86	11010.7	12489.6	17671.3	24526	67835.7	0	249.972	458.174	3186.18	0	3.0874	5.7446	39.231
552.581	3756.76	14050.2	15939.6	22559.6	31322.3	86600.1	0	318.978	585.024	4047.88	0	3.7792	6.99487	47.861		437.039	2972.51	11117.5	12610.5	17841.7	24761.8	68490.6	0	252.402	462.587	3217.12	0	3.11698	5.79911	39.6047
570.965	3881.17	14515.5	16469.1	23313.1	32375.1	89491.5	0	329.537	604.623	4176.18	0	3.85097	7.12009	48.735		441.74	3004.37	11236.4	12744.8	18031.3	25024.3	69219.1	0	255.105	467.495	3251.35	0	3.14808	5.85624	39.9968
550.189	3740.29	13988	15868.5	22458.2	31180.6	86211.9	0	317.576	582.384	4030.62	0	3.76765	6.97559	47.7237		450.709	3065.24	11463.8	13002.6	18395.8	25530	70618.9	0	260.271	476.945	3316.36	0	3.20433	5.95905	40.7036
546.086	3712.45	13883.9	15750.2	22290.4	30947	85567.9	0	315.212	578.028	4001.59	0	3.74855	6.94227	47.4907		459.241	3123.14	11680.3	13248.2	18743.6	26013	71953.7	0	265.186	485.965	3378.14	0	3.25725	6.05568	41.3682
544.321	3700.49	13839.2	15699.4	22218.3	30846.5	85291.1	0	314.197	576.155	3989.07	0	3.73975	6.9267	47.3825		466.764	3174.19	11871	13464.5	19049.7	26438.3	73129.1	0	269.518	493.904	3432.56	0	3.30338	6.13982	41.9471
546.86	3717.85	13904.4	15773.7	22324	30994	85696.5	0	315.673	578.903	4007.09	0	3.75035	6.94441	47.5084		474.723	3228.22	12073.1	13694	19375	26891	74378	0	274.105	502.35	3489.83	0	3.3494	6.22314	42.5219
574.821	3907.02	14611.6	16577.9	23467.3	32589.8	90084.3	0	331.727	608.627	4201.67	0	3.8574	7.12615	48.7899		481.333	3273.1	12240.9	13884.6	19645.4	27267.2	75415.7	0	277.915	509.37	3537.35	0	3.38718	6.29141	42.9932
540.61	3675.83	13747.9	15596.7	22073.6	30646.2	84734	0	312.112	572.409	3963.18	0	3.71942	6.88814	47.1216		486.669	3309.32	12376.5	14038.5	19863.7	27571	76253.6	0	280.991	515.039	3575.67	0	3.41736	6.34587	43.3693
528.983	3596.34	13449.3	15256.1	21588.8	29969.4	82876	0	305.352	559.802	3879.38	0	3.65827	6.7807	46.3715		490.008	3331.99	12461.3	14135	20000.6	27761.5	76778.6	0	282.916	518.592	3599.59	0	3.43574	6.37891	43.5979
523.519	3559.15	13310	15097.6	21363.9	29656.5	82013.4	0	302.193	553.962	3839.88	0	3.62572	6.72136	45.963		492.503	3348.94	12524.7	14207.1	20102.9	27903.9	77171.2	0	284.355	521.248	3617.45	0	3.44937	6.40337	43.7671
519.341	3531.07	13205.5	14979.2	21196.1	29422.8	81368.4	0	299.815	549.605	3809.97	0	3.60263	6.67589	45.6583		494.511	3362.66	12576.2	14265.7	20186.2	28020.2	77490.8	0	285.521	523.414	3631.79	0	3.4592	6.42072	43.8878
516.257	3510.28	13128.1	14891.8	21072.7	29251.4	80893.7	0	298.053	546.406	3788.06	0	3.58587	6.64529	45.4483		496.538	3376.57	12629	14326.8	20274.2	28144.2	77826.5	0	286.708	525.713	3646.55	0	3.46749	6.43661	44.0002
513.187	3489.62	13051.3	14805.2	20950.5	29081.8	80423.4	0	296.303	543.241	3766.31	0	3.56918	6.61505	45.2404		497.702	3384.25	12657.2	14358.4	20319	28207.2	77999.8	0	287.355	526.88	3653.91	0	3.46821	6.4374	44.0015
513.082	3488.55	13046.3	14798.3	20939.4	29065.7	80383.8	0	296.203	542.943	3764.85	0	3.56684	6.61092	45.21		497.332	3381.58	12646.9	14346.3	20301.7	28182.8	77933.8	0	287.126	526.428	3650.42	0	3.4614	6.42257	43.9051
514.012	3494.49	13067.9	14822.5	20973.9	29114.3	80517	0	296.701	543.842	3771.16	0	3.5705	6.62118	45.2722		495.829	3371.44	12609.1	14303.6	20241.4	28099.1	77702	0	286.266	524.864	3638.98	0	3.44768	6.39455	43.7194
516.169	3509.22	13123.2	14885.5	21063.3	29238.7	80859.8	0	297.953	546.164	3786.96	0	3.5838	6.64547	45.4393		493.921	3358.67	12562.3	14252	20170.8	28004.2	77428.4	0	285.188	523.064	3625.26	0	3.43112	6.36806	43.5282
520.597	3539.27	13235.3	15012.5	21242.8	29487.8	81549.5	0	300.503	550.817	3818.49	0	3.60813	6.68759	45.7338		489.151	3326.1	12440.1	14112.8	19972.7	27728.3	76669.4	0	282.42	517.917	3589.87	0	3.39688	6.3033	43.088
524.821	3568.23	13344.3	15136.7	21419.3	29733.3	82225.5	0	302.968	555.399	3849.27	0	3.63306	6.73125	46.0396		482.307	3279.46	12265.3	13913.9	19690.4	27335.3	75586.7	0	278.457	510.588	3539.71	0	3.3517	6.21896	42.5122
529.286	3599.19	13462.2	15273.1	21615.7	30010	82974.7	0	305.616	560.531	3882.76	0	3.65972	6.78105	46.3813		476.439	3239.5	12115.5	13743.5	19448.7	26999	74659.6	0	275.062	504.313	3496.5	0	3.31171	6.14337	41.9982
533.741	3629.03	13573.2	15399.4	21796.3	30264.5	83668.8	0	308.14	565.245	3913.57	0	3.67543	6.81541	46.6019		470.855	3201.83	11975.2	13585	19224.8	26688.5	73798.8	0	271.868	498.511	3456.15	0	3.27593	6.07589	41.5391
537.671	3655.41	13671.2	15509.9	21952.1	30480.1	84268.1	0	310.374	569.28	3940.54	0	3.69116	6.84025	46.7818		466.02	3169.25	11853.9	13447.9	19031.3	26420.3	73055	0	269.109	493.497	3421.61	0	3.24726	6.02318	41.1774
539.485	3667.53	13716.1	15560.4	22023	30577.6	84540.8	0	311.398	571.111	3952.71	0	3.69743	6.849	46.8482		462.905	3148.04	11775	13359.3	18907.3	26249	72576.7	0	267.309	490.292	3399.23	0	3.22615	5.9885	40.9405
541.655	3682.12	13770.3	15621.5	22109.1	30696.5	84871.8	0	312.634	573.337	3967.58	0	3.70636	6.86267	46.9484		465.003	3162.21	11827.8	13419.1	18992.4	26369.1	72904.9	0	268.51	492.515	3413.96	0	3.23602	6.00823	41.0615
543.177	3692.38	13808.5	15664.7	22169.9	30780.6	85105.7	0	313.504	574.912	3978.09	0	3.71293	6.87285	47.0227		469.881	3195.25	11951.2	13559	19190.5	26644.4	73665.5	0	271.314	497.652	3448.83	0	3.2629	6.05622	41.3941
543.976	3697.79	13828.7	15687.4	22201.9	30824.8	85228.7	0	313.963	575.739	3983.58	0	3.71618	6.87746	47.0577		475.836	3235.61	12102	13730	19432.5	26980.7	74595	0	274.739	503.931	3491.46	0	3.29607	6.11569	41.8058
544.052	3698.34	13830.7	15689.7	22204.9	30828.7	85240.2	0	314.009	575.814	3984.03	0	3.71593	6.87601	47.0502		483.617	3288.55	12300.2	13955.1	19751.3	27422.4	75817.1	0	279.235	512.193	3548.2	0	3.34598	6.20641	42.4374
547.752	3723.72	13926.3	15798.9	22360.5	31046.1	85836.4	0	316.17	579.863	4010.65	0	3.73365	6.90665	47.2658		492.271	3347.23	12518.8	14202	20099	27903.6	77154.3	0	284.211	521.193	3610.18	0	3.39881	6.29738	43.0694
551.739	3751.16	14029.9	15917.9	22531.2	31286	86489.2	0	318.508	584.317	4039.47	0	3.75157	6.9386	47.4875		501.245	3407.85	12745	14458.1	20461.1	28406.3	78545.7	0	289.353	530.582	3674.36	0	3.45036	6.39166	43.7175
553.91	3765.7	14084.5	15980.8	22622.4	31416.2	86838.5	0	319.742	586.714	4054.4	0	3.75519	6.95019	47.5545		505.857	3439.06	12861.4	14590.2	20648.4	28666.8	79264.7	0	291.999	535.443	3707.57	0	3.47829	6.44354	44.0722
552.787	3757.81	14054.4	15946	22572.4	31345.9	86647.7	0	319.067	585.407	4045.15	0	3.74131	6.9222	47.3681		509.499	3463.85	12954.5	14696	20798.8	28876.3	79841.4	0	294.107	539.35	3734.25	0	3.50211	6.48835	44.3774
552.103	3752.89	14035.4	15923.8	22540.1	31300.4	86525.3	0	318.643	584.564	4038.96	0	3.72993	6.89833	47.211		514.534	3498.32	13083.9	14843.7	21008.7	29169.5	80646.5	0	297.039	544.808	3772.23	0	3.5414	6.56427	44.8899
552.511	3755.37	14044	15933	22552.8	31317.6	86575	0	318.848	584.888	4040.38	0	3.72363	6.88272	47.1131		518.971	3528.65	13197.2	14971.5	21188.2	29416.2	81335.9	0	299.614	549.442	3805.19	0	3.5773	6.62696	45.328
552.789	3757.1	14050.3	15940	22562.6	31331.4	86613.1	0	318.992	585.144	4041.17	0	3.71793	6.86843	47.0241		523.214	3557.09	13302.9	15090.7	21356.3	29649.1	81982.6	0	302.022	553.795	3835.6	0	3.60425	6.67834	45.6762
551.947	3751.58	14030.1	15917.8	22532.2	31290.6	86495.4	0	318.528	584.368	4034.65	0	3.70782	6.84762	46.887		526.824	3581.75	13395.5	15196.3	21506.4	29858.3	82557.8	0	304.118	557.695	3862.28	0	3.62895	6.7254	45.9953
551.181	3746.65	14012.6	15899	22507.2	31257.7	86397.4	0	318.117	583.738	4029.23	0	3.70033	6.83352	46.7912		527.705	3587.9	13418.9	15223.4	21545.6	29913.7	82707.4	0	304.645	558.72	3869.63	0	3.63987	6.74805	46.1447
550.635	3743.24	14000.8	15886.7	22491.2	31237.2	86334	0	317.836	583.339	4025.57	0	3.69474	6.823	46.7196		524.454	3565.96	13336.7	15129.5	21411.2	29724.7	82192.1	0	302.782	555.214	3846.96	0	3.6284	6.72548	45.994
549.869	3737.94	13981.1	15865.2	22462.7	31200.1	86223.2	0	317.385	582.625	4019.7	0	3.68453	6.81025	46.6176		523.059	3556.3	13300	15087.2	21350.3	29639	81959.7	0	301.957	553.624	3836.85	0	3.62208	6.71486	45.9186
548.888	3731.2	13955.8	15836.4	22421.8	31143.7	86066.9	0	316.811	581.566	4012.05	0	3.6747	6.79119	46.4888		524.816	3568.16	13344.3	15137.2	21420.9	29736.7	82230.9	0	302.963	555.452	3849.53	0	3.6331	6.73518	46.0579
548.496	3728.5	13945.6	15824.8	22405.4	31120.7	86003.9	0	316.582	581.138	4009.01	0	3.6709	6.78382	46.4392		527.816	3588.53	13420.4	15223.7	21543.3	29906.8	82700.7	0	304.692	558.628	3871.12	0	3.65065	6.76702	46.2773
548.205	3726.51	13938.1	15816.3	22393.3	31103.8	85957.3	0	316.412	580.822	4006.76	0	3.66811	6.7784	46.4026		532.635	3621.22	13542.7	15362.7	21740.6	30181.5	83457.8	0	307.467	563.752	3905.57	0	3.67701	6.81433	46.6045
548.019	3725.22	13933.3	15810.8	22385.4	31092.8	85927.2	0	316.303	580.618	4005.31	0	3.66631	6.77491	46.3791		535.479	3640.51	13614.8	15444.6	21856.9	30343.5	83904	0	309.104	566.772	3925.84	0	3.69192	6.84093	46.7889
548.056	3725.49	13934.3	15812	22387.1	31095.1	85933.6	0	316.326	580.661	4005.65	0	3.66706	6.77642	46.3891		537.586	3654.79	13668.2	15505.2	21943	30463.4	84234.4	0	310.317	569.007	3940.84	0	3.70284	6.86036	46.9237
547.841	3724.07	13929.1	15806	22378.6	31083.3	85901.2	0	316.206	580.442	4004.44	0	3.66828	6.7794	46.4079		540.004	3671.19	13729.6	15574.9	22041.8	30601.1	84613.9	0	311.709	571.575	3958.04	0	3.71515	6.88223	47.0756
547.109	3719.16	13910.8	15785.3	22349.1	31042.1	85787.7	0	315.79	579.674	3999.64	0	3.66758	6.77918	46.4039		543.342	3693.82	13814.2	15671	22178.3	30791.1	85137.5	0	313.63	575.118	3981.74	0	3.73186	6.91182	47.2812
546.036	3711.94	13883.9	15754.8	22305.7	30981.4	85621.1	0	315.178	578.545	3992.48	0	3.66565	6.77695	46.3856		547.023	3718.77	13907.5	15777	22328.7	31000.7	85715	0	315.748	579.027	4007.82	0	3.74982	6.9435	47.5017
547.156	3719.62	13912.7	15787.6	22352.5	31045.9	85799.5	0	315.831	579.759	4001.04	0	3.67567	6.79583	46.5159		556.199	3781.18	14141.4	16043.2	22707	31528.1	87165.9	0	321.049	588.857	4072.88	0	3.79213	7.01694	48.0161
547.752	3723.76	13928.2	15804.5	22374.6	31074.8	85886	0	316.184	580.311	4005.66	0	3.68384	6.80549	46.5957		564.769	3839.26	14358.7	16290.5	23058.6	32018.7	88514.9	0	325.981	597.997	4133	0	3.82869	7.07996	48.4582
547.869	3724.36	13929.5	15804.9	22373.9	31072.2	85885.1	0	316.227	580.277	4006.27	0	3.68732	6.81129	46.6349		563.795	3832.62	14333.8	16262.1	23018	31961.9	88359.2	0	325.416	596.938	4126.2	0	3.82515	7.07455	48.4186
549.517	3735.3	13969.9	15850.1	22437	31158.7	86128.3	0	317.152	581.903	4017.69	0	3.6959	6.82649	46.7404		561.872	3819.68	14285.5	16207.4	22940.5	31854.1	88061.7	0	324.319	594.929	4112.91	0	3.81733	7.06115	48.3245
551.811	3750.63	14026.5	15913.5	22526	31281.8	86471.9	0	318.447	584.206	4033.73	0	3.70787	6.84791	46.8885		560.107	3807.85	14241.8	16158.1	22871.1	31757.9	87794.3	0	323.32	593.13	4100.83	0	3.80958	7.04801	48.2324
553.96	3765.05	14080.1	15974	22611.4	31400	86800.1	0	319.667	586.418	4048.94	0	3.71936	6.86904	47.0331		561.99	3820.43	14288.5	16211.3	22947.3	31865.6	88087.2	0	324.384	595.121	4113.52	0	3.81333	7.05667	48.2863
555.458	3775.19	14118	16017	22672.1	31484.3	87033.3	0	320.528	587.991	4059.77	0	3.72802	6.88548	47.1446		560.26	3808.7	14244.7	16161.4	22876.4	31766.8	87815.4	0	323.388	593.28	4101.34	0	3.80551	7.04311	48.1913
557.022	3785.83	14157.8	16062.3	22736.5	31573.9	87280.2	0	321.432	589.663	4071.22	0	3.73753	6.90376	47.2681		557.359	3789.12	14171.6	16078.7	22759.1	31603.7	87364.8	0	321.728	590.237	4081.25	0	3.79421	7.02459	48.059
558.59	3796.55	14198.1	16108.3	22801.9	31665.1	87530.9	0	322.344	591.364	4082.81	0	3.74765	6.92333	47.4001		554.209	3767.94	14092.5	15988.3	22629.8	31421.3	86868.3	0	319.932	586.858	4059.33	0	3.78346	7.00189	47.911
560.972	3812.85	14259.5	16178.4	22901.8	31804.6	87913.3	0	323.731	593.961	4100.31	0	3.76225	6.95107	47.5885		551.634	3750.27	14025.8	15911.9	22520.4	31267.7	86449.6	0	318.427	584.005	4040.71	0	3.77127	6.97996	47.7595
562.463	3823.14	14298.3	16222.9	22965.4	31893.6	88156.7	0	324.608	595.618	4111.68	0	3.77429	6.97464	47.7469		549.496	3735.65	13970.8	15848.9	22430.4	31141.8	86105.2	0	317.183	581.662	4025.33	0	3.76072	6.96099	47.6281
563.189	3828.25	14317.9	16245.5	22997.9	31939.3	88280.7	0	325.046	596.466	4117.81	0	3.78424	6.99493	47.8816		547.35	3720.98	13915.5	15785.8	22340.5	31016.3	85760.9	0	315.934	579.325	4009.85	0	3.74974	6.94151	47.4924
565.931	3846.99	14388.3	16326	23112.7	32100	88720.6	0	326.639	599.455	4137.71	0	3.80055	7.02498	48.0877		544.58	3702.09	13844.8	15705.5	22226.6	30857.9	85323.8	0	314.329	576.368	3990.06	0	3.73535	6.91705	47.3196
568.417	3863.93	14451.9	16398.6	23215.8	32242.9	89114.9	0	328.079	602.127	4155.75	0	3.8156	7.05046	48.2734		541.906	3684.01	13777.4	15629	22118.2	30706.9	84907.3	0	312.796	573.553	3971.23	0	3.72298	6.89543	47.1687
569.666	3872.37	14483	16433.1	23263.9	32309.2	89301.2	0	328.793	603.369	4164.41	0	3.8231	7.06158	48.3507		539.473	3667.49	13715.5	15558.7	22018.4	30567.9	84524.5	0	311.394	570.962	3953.89	0	3.71048	6.87317	47.0143
571.037	3881.53	14517.1	16471.6	23318.3	32384.9	89510.7	0	329.569	604.782	4173.74	0	3.82777	7.06933	48.4058		534.787	3635.74	13596.9	15424	21827.5	30302.4	83791.6	0	308.698	566.007	3920.68	0	3.68746	6.83252	46.7315
572.596	3891.99	14555.9	16515.4	23380.1	32470.7	89748.6	0	330.453	606.384	4184.43	0	3.83344	7.07883	48.4731		531.786	3615.38	13520.7	15337.5	21704.9	30131.6	83320.8	0	306.97	562.822	3899.31	0	3.67202	6.80504	46.5408
574.124	3902.24	14594	16558.5	23441.1	32555.5	89983.1	0	331.322	607.966	4194.9	0	3.83871	7.08759	48.5353		530.643	3607.62	13491.7	15304.5	21658.1	30066.4	83141.2	0	306.312	561.606	3891.14	0	3.66592	6.79412	46.4652
574.217	3902.89	14596.6	16561.6	23445.8	32562.5	90000.9	0	331.378	608.093	4195.37	0	3.83702	7.08408	48.5122		530.666	3607.77	13492.2	15305.1	21658.7	30067.1	83143.6	0	306.324	561.62	3891.22	0	3.66547	6.79313	46.4587
574.381	3904.04	14601	16566.9	23453.8	32574.3	90031.2	0	331.476	608.307	4196.29	0	3.83508	7.07995	48.4851		530.696	3607.94	13492.7	15305.5	21659	30067.4	83145.3	0	306.337	561.628	3891.29	0	3.66464	6.79134	46.447
574.648	3905.92	14608.5	16576	23467.4	32594.1	90082.2	0	331.639	608.666	4198.02	0	3.83288	7.07552	48.4565		529.71	3601.24	13467.7	15277	21618.6	30011.1	82990.1	0	305.768	560.577	3884.23	0	3.65927	6.78169	46.3803
573.779	3900.07	14586.7	16551.4	23432.9	32546.4	89949.5	0	331.143	607.774	4191.83	0	3.82784	7.06654	48.3943		536.195	3645.59	13635	15469.3	21895.3	30401.9	84049	0	309.544	567.812	3930.62	0	3.6853	6.83165	46.7178
573.326	3897.02	14575.5	16538.9	23415.3	32522.2	89881.7	0	330.886	607.321	4188.72	0	3.82565	7.06327	48.3714		570.102	3874.92	14491.6	16441.6	23274.4	32322	89343.8	0	329.001	603.624	4167.07	0	3.82622	7.06731	48.3899
573.519	3898.33	14580.3	16544.3	23423	32532.8	89911.2	0	330.997	607.519	4190.03	0	3.82638	7.0641	48.3774		574.135	3902.16	14593.3	16557.1	23438.3	32550.4	89973	0	331.311	607.882	4194.95	0	3.84022	7.09073	48.5558
573.839	3900.46	14588.2	16553.1	23435.3	32549.8	89958.7	0	331.176	607.837	4192.22	0	3.82786	7.0667	48.3955		574.299	3903.32	14597.7	16562.2	23445.4	32560.2	90000.4	0	331.411	608.067	4196.41	0	3.84291	7.09611	48.5918
573.79	3900.14	14587	16551.7	23433.3	32547	89951.2	0	331.149	607.786	4191.89	0	3.8278	7.0665	48.3941		529.878	3602.37	13471.8	15281.7	21625.2	30020.4	83015.9	0	305.864	560.75	3885.4	0	3.65987	6.78266	46.3872
573.343	3897.13	14575.8	16539.4	23416.2	32523.5	89884.8	0	330.894	607.344	4188.77	0	3.82494	7.06216	48.364		530.972	3609.85	13500	15313.9	21671.1	30084.4	83191.3	0	306.5	561.942	3893.38	0	3.66694	6.79572	46.4767
573.037	3894.97	14567.7	16530.2	23403.7	32507.5	89837.5	0	330.711	607.032	4186.07	0	3.81915	7.05252	48.2921		533.152	3624.59	13555	15376.1	21759.2	30206.9	83530.1	0	307.75	564.23	3908.77	0	3.67715	6.81356	46.6013
572.794	3893.26	14561.2	16522.8	23393.3	32493.1	89797.4	0	330.564	606.762	4183.78	0	3.81381	7.04161	48.2197		534.963	3636.78	13600.4	15427.6	21832.1	30308.4	83810.2	0	308.784	566.122	3921.41	0	3.68496	6.82697	46.6955
572.582	3891.77	14555.5	16516.3	23384.2	32480.4	89762.5	0	330.436	606.526	4181.81	0	3.8093	7.0324	48.1586		536.579	3647.98	13642.6	15475.7	21900.3	30403	84071.3	0	309.738	567.89	3933.2	0	3.69441	6.84191	46.8041
572.733	3892.79	14559.3	16520.7	23390.3	32488.8	89785.9	0	330.523	606.684	4182.83	0	3.80966	7.03257	48.162		537.461	3654.18	13666.4	15503.5	21940.7	30460.3	84225	0	310.27	568.949	3939.93	0	3.6998	6.85181	46.8728
573.221	3896.1	14571.7	16534.6	23409.8	32515.7	89860.9	0	330.804	607.187	4186.47	0	3.81398	7.04047	48.2154		536.502	3647.55	13641.3	15474.6	21899	30401.6	84065.8	0	309.705	567.861	3932.84	0	3.69438	6.84184	46.804
573.682	3899.24	14583.4	16547.8	23428.4	32541.4	89932.5	0	331.07	607.668	4189.96	0	3.81806	7.04832	48.2685		530.75	3608.15	13493.2	15305.7	21659.1	30067.5	83146.5	0	306.352	561.63	3891.19	0	3.66204	6.78579	46.4106
573.413	3897.58	14577.5	16541.3	23419.1	32528	89896.1	0	330.932	607.424	4189.1	0	3.82381	7.06029	48.3515		524.555	3566.22	13336.6	15127.9	21407	29716.6	82178.6	0	302.794	555.084	3847.26	0	3.63071	6.73022	46.0246
572.882	3894.08	14564.3	16525.9	23396.4	32495.2	89809.6	0	330.636	606.824	4185.98	0	3.82775	7.06701	48.3951		518.297	3523.78	13177.9	14947.8	21151.6	29361	81197.9	0	299.192	548.451	3802.59	0	3.59758	6.67102	45.6144
572.485	3891.32	14553.7	16513.4	23378	32468.6	89739.6	0	330.399	606.337	4183.47	0	3.83004	7.07214	48.4282		510.821	3473.11	12988.6	14733	20847.3	28937.8	80029.5	0	294.892	540.555	3749.25	0	3.55806	6.6004	45.1251
571.727	3886.14	14534.1	16490.8	23345.3	32422.3	89614.7	0	329.958	605.48	4178.49	0	3.83069	7.07435	48.441		503.71	3424.85	12808.1	14528	20556.8	28533.9	78914.6	0	290.795	533.017	3698.32	0	3.51895	6.5301	44.6389
570.431	3877.34	14501	16452.7	23290.6	32345.1	89405.2	0	329.209	604.049	4169.78	0	3.82934	7.07315	48.4299		504.443	3430.36	12829.9	14553.9	20594.3	28586.1	79055.6	0	291.274	533.992	3703.3	0	3.51729	6.52016	44.5883
568.692	3865.49	14456.4	16401.6	23217.3	32242	89124.6	0	328.201	602.137	4157.88	0	3.82593	7.06834	48.3934		573.558	3898.05	14578.6	16542.3	23421.2	32532.7	89905.4	0	330.965	607.493	4186.05	0	3.79354	6.99727	47.9319
568.427	3863.63	14449.2	16393.2	23205.1	32224.6	89078.2	0	328.042	601.816	4156.15	0	3.82659	7.07015	48.4043		527.508	3585.92	13410.7	15214.1	21533.6	29899.3	82662.2	0	304.467	558.43	3862.64	0	3.59713	6.65769	45.5519
569.089	3868.1	14465.9	16412.1	23231.8	32261.7	89180.9	0	328.421	602.51	4160.83	0	3.82971	7.07577	48.4431		481.44	3273.77	12243.2	13886.7	19647.7	27269.4	75425.1	0	277.97	509.42	3538.56	0	3.39343	6.30381	43.0758
569.012	3867.57	14463.9	16409.9	23228.7	32257.4	89168.9	0	328.376	602.428	4160.28	0	3.82934	7.0751	48.4385		482.311	3279.69	12265.4	13912	19683.6	27319.3	75562.7	0	278.474	510.352	3544.85	0	3.3984	6.31284	43.1381
568.3	3862.77	14446	16389.6	23199.9	32217.4	89058.4	0	327.969	601.682	4155.26	0	3.82605	7.06919	48.3977		483.939	3290.76	12306.8	13959.1	19750.4	27412.2	75818.9	0	279.414	512.085	3556.57	0	3.40759	6.32949	43.2529
567.787	3859.32	14433.2	16375.1	23179.4	32189	88979.6	0	327.677	601.151	4151.64	0	3.82353	7.06464	48.3664		486.476	3307.99	12371.3	14032.3	19854.1	27556.6	76217.2	0	280.876	514.779	3574.82	0	3.42206	6.35566	43.4336
569.074	3868	14465.5	16411.7	23231.2	32260.9	89178.7	0	328.412	602.495	4160.72	0	3.8296	7.07555	48.4417		490.154	3332.95	12464.6	14138.3	20004.5	27765.8	76794.3	0	282.996	518.682	3601.25	0	3.44299	6.39348	43.6947
569.952	3873.93	14487.7	16436.8	23266.7	32310.2	89315	0	328.916	603.415	4167	0	3.83419	7.08408	48.4999		494.343	3361.39	12571	14259.1	20175.7	28003.9	77451.5	0	285.41	523.127	3631.35	0	3.46667	6.43625	43.99
570.254	3875.98	14495.3	16445.5	23279	32327.1	89362	0	329.09	603.731	4169.24	0	3.83625	7.08812	48.527		497.291	3381.4	12645.9	14344.1	20296.2	28171.5	77913.8	0	287.109	526.253	3652.53	0	3.48338	6.46643	44.1983
570.111	3875.02	14491.7	16441.3	23273	32318.8	89339.2	0	329.008	603.577	4168.33	0	3.83634	7.08865	48.5297		498.958	3392.72	12688.2	14392.1	20364.3	28266.2	78175.2	0	288.07	528.021	3664.49	0	3.49279	6.4834	44.3155
570.478	3877.51	14501	16451.9	23288.1	32339.8	89397.1	0	329.219	603.969	4170.91	0	3.83784	7.09127	48.548		500.484	3403.07	12726.9	14436.1	20426.6	28352.9	78414.5	0	288.949	529.638	3675.43	0	3.50121	6.49858	44.4204
571.562	3884.85	14528.5	16483.2	23332.7	32402	89567.9	0	329.843	605.127	4178.45	0	3.84173	7.09785	48.5945		501.666	3411.1	12756.9	14470.1	20474.8	28419.9	78599.5	0	289.63	530.888	3683.89	0	3.50738	6.50962	44.4969
572.563	3891.63	14553.9	16512.2	23373.8	32459.5	89725.8	0	330.419	606.198	4185.43	0	3.84534	7.10398	48.6377		502.609	3417.49	12780.8	14497.3	20513.2	28473.3	78747	0	290.173	531.885	3690.62	0	3.51232	6.51844	44.5581
573.102	3895.29	14567.6	16527.7	23395.8	32490.2	89810.3	0	330.729	606.769	4189.18	0	3.84737	7.10735	48.6618		503.693	3424.85	12808.3	14528.5	20557.5	28535	78917	0	290.797	533.035	3698.39	0	3.51815	6.52891	44.6305
573.071	3895.09	14566.8	16526.8	23394.6	32488.4	89805.5	0	330.712	606.736	4189.04	0	3.8478	7.10836	48.6682		504.628	3431.19	12832	14555.4	20595.7	28588.1	79063.6	0	291.335	534.027	3705.07	0	3.52311	6.53777	44.6919
572.909	3894	14562.8	16522.2	23388	32479.1	89780.3	0	330.62	606.565	4188.05	0	3.84812	7.10941	48.6743		505.636	3438.02	12857.6	14584.4	20636.9	28645.5	79221.7	0	291.916	535.097	3712.27	0	3.52848	6.54738	44.7585
573.008	3894.7	14565.5	16525.3	23392.3	32485	89796.7	0	330.68	606.675	4188.96	0	3.84989	7.11316	48.6989		506.875	3446.43	12889	14620.2	20687.6	28716.1	79416.2	0	292.629	536.412	3721.13	0	3.53518	6.5594	44.8417
573.064	3895.12	14567.1	16527.2	23395	32488.7	89807	0	330.716	606.746	4189.61	0	3.85178	7.11729	48.7257		506.054	3440.86	12868.2	14596.5	20654.1	28669.5	79287.7	0	292.156	535.544	3715.23	0	3.5304	6.55073	44.782
572.801	3893.39	14560.7	16520.1	23385	32474.7	89768.1	0	330.571	606.485	4188.06	0	3.85261	7.11969	48.7401		505.086	3434.29	12843.6	14568.6	20614.6	28614.6	79136	0	291.599	534.518	3708.27	0	3.52482	6.54063	44.7123
572.355	3890.44	14549.8	16507.8	23367.7	32450.7	89701.4	0	330.321	606.036	4185.26	0	3.85281	7.12111	48.7475		504.766	3432.12	12835.5	14559.4	20601.5	28596.5	79085.9	0	291.414	534.18	3705.96	0	3.5229	6.53714	44.6882
571.879	3887.29	14538.2	16494.8	23349.4	32425.4	89630.9	0	330.055	605.563	4182.26	0	3.85293	7.1224	48.7538		506.247	3442.17	12873.1	14602.1	20661.9	28680.3	79317.7	0	292.268	535.746	3716.64	0	3.53174	6.55322	44.799
570.572	3878.54	14505.7	16458.1	23297.5	32353.4	89431.4	0	329.315	604.218	4173.58	0	3.85029	7.11942	48.729		508.735	3459.06	12936.3	14673.8	20763.6	28821.6	79707.8	0	293.702	538.383	3734.58	0	3.54679	6.58062	44.9876
568.471	3864.41	14453.1	16398.5	23213.1	32236.1	89107.1	0	328.118	602.028	4159.43	0	3.84477	7.11179	48.6708		539.618	3668.71	13721.5	15568	22035.7	30596.9	84586.4	0	311.506	571.457	3952.77	0	3.68429	6.82155	46.6772
566.76	3852.86	14410	16349.6	23143.7	32138.9	88840.1	0	327.138	600.224	4147.67	0	3.83893	7.10255	48.6044		574.005	3901.4	14590.9	16555.1	23436.5	32549.4	89965.1	0	331.25	607.849	4193.17	0	3.83098	7.07085	48.426
566.39	3850.36	14400.7	16339	23128.6	32117.5	88782	0	326.926	599.828	4145.14	0	3.83781	7.10019	48.5918		569.06	3868.1	14466.7	16414.4	23237.1	32271.8	89199.1	0	328.427	602.673	4159.51	0	3.81653	7.04898	48.2655
567.064	3854.86	14417.4	16357.8	23155.3	32155.4	88885.3	0	327.307	600.525	4149.55	0	3.83859	7.10126	48.5966		538.461	3660.35	13688.6	15528.2	21976	30510.3	84361.8	0	310.783	569.873	3943.96	0	3.685	6.82123	46.6692
567.934	3860.66	14438.8	16382	23189.4	32202.8	89016.7	0	327.797	601.41	4155.15	0	3.83917	7.10071	48.5966		566.727	3852.26	14407.3	16346.4	23139.7	32135	88826	0	327.082	600.132	4143.59	0	3.81157	7.0417	48.2113
568.397	3863.71	14450.1	16394.6	23207.2	32227.4	89085.3	0	328.055	601.87	4157.99	0	3.83859	7.09839	48.5836		574.925	3907.5	14613.3	16579.9	23470.8	32595.9	90097.8	0	331.765	608.729	4200.25	0	3.84177	7.09257	48.5707
568.556	3864.7	14453.6	16398.5	23212.5	32234.6	89105.9	0	328.137	602.006	4158.68	0	3.83668	7.09373	48.5542		571.758	3886.02	14532.9	16488.5	23340.9	32414.9	89599.5	0	329.94	605.354	4178.12	0	3.82892	7.07114	48.4186
569.23	3869.21	14470.3	16417.4	23239.3	32272	89209.1	0	328.518	602.703	4163.04	0	3.83729	7.09364	48.5564		571.058	3881.32	14515.3	16468.4	23312.2	32374.5	89489.3	0	329.542	604.604	4173.61	0	3.829	7.07239	48.4245
570.207	3875.79	14494.9	16445.2	23278.9	32327.2	89361	0	329.076	603.731	4169.59	0	3.8393	7.09614	48.5763		553.51	3762.52	14071.1	15963.4	22594.7	31373.6	86735.4	0	319.459	585.956	4051.22	0	3.76032	6.95598	47.6029
571.923	3887.39	14538.3	16494.6	23349.2	32425.4	89630.7	0	330.06	605.559	4181.36	0	3.84444	7.10418	48.6349		533.089	3624.3	13554.3	15375.8	21759.2	30207.3	83529	0	307.729	564.233	3908.8	0	3.6793	6.81839	46.6327
574.18	3902.61	14595.1	16559	23440.6	32552.7	89981.6	0	331.351	607.933	4196.7	0	3.85101	7.11378	48.7065		535.374	3639.79	13612.1	15441.4	21852.3	30337	83886.6	0	309.044	566.651	3924.99	0	3.69007	6.83732	46.7647
576.274	3916.74	14647.8	16619.1	23526	32672	90309.5	0	332.549	610.155	4210.81	0	3.8561	7.12062	48.7593		537.659	3655.36	13670.5	15507.9	21946.9	30469.1	84249.4	0	310.367	569.11	3941.2	0	3.70049	6.85514	46.8903
577.254	3923.35	14672.6	16647.3	23566.4	32728.8	90464.5	0	333.111	611.209	4217.23	0	3.8568	7.12026	48.7606		538.117	3658.67	13683.8	15524.4	21972.1	30506.3	84343.7	0	310.655	569.787	3944.8	0	3.70025	6.8565	46.9018
577.841	3927.42	14688	16665.2	23592.1	32765.3	90562.9	0	333.458	611.884	4221.09	0	3.85607	7.1176	48.7454		533.417	3626.57	13563.3	15387.2	21777.6	30236.3	83598.2	0	307.925	564.741	3910.03	0	3.66814	6.79747	46.4898
578.159	3929.8	14697.6	16676.9	23609.8	32791.3	90629.4	0	333.667	612.356	4223.34	0	3.85429	7.11313	48.7176		528.335	3591.87	13433	15238.6	21566.1	29941	82787.7	0	304.975	559.242	3872.46	0	3.6335	6.73161	46.043
578.248	3930.34	14699.8	16680	23615.5	32801.1	90650.4	0	333.712	612.52	4223.62	0	3.84982	7.10774	48.6739		520.863	3541.21	13243.6	15023.5	21261.1	29516.5	81616.8	0	300.675	551.322	3818.57	0	3.58913	6.64968	45.4816
578.098	3929.22	14695.5	16675.1	23608.7	32792	90624.5	0	333.616	612.347	4221.72	0	3.84259	7.09285	48.5754		511.418	3477.47	13006.1	14754.7	20881.1	28989.3	80156.7	0	295.272	541.473	3751.16	0	3.53529	6.55127	44.805
577.611	3925.82	14682.6	16660.4	23588.1	32763.6	90545.6	0	333.325	611.814	4217.39	0	3.83339	7.07433	48.452		503.163	3421.3	12796.2	14517.3	20546.5	28527	78871.7	0	290.503	532.817	3691.28	0	3.48153	6.45806	44.1521
577.023	3921.77	14667.4	16643.1	23563.6	32729.7	90451.7	0	332.981	611.179	4212.77	0	3.82704	7.06193	48.3685		497.35	3381.64	12647.5	14348	20305.9	28191.3	77948.8	0	287.133	526.562	3648.28	0	3.44085	6.38131	43.6299
576.506	3918.24	14654.2	16628.1	23542.3	32700.1	90369.9	0	332.68	610.627	4208.86	0	3.82273	7.0537	48.3128		496.015	3372.66	12614.1	14310.3	20252.6	28117.3	77743.6	0	286.372	525.179	3639.05	0	3.43536	6.37236	43.5658
576.143	3915.76	14644.9	16617.5	23527.4	32679.5	90312.8	0	332.47	610.241	4206.17	0	3.82014	7.04882	48.2796		497.165	3380.57	12643.9	14344.5	20301.5	28185.8	77930.8	0	287.045	526.453	3647.98	0	3.44603	6.39341	43.707
575.782	3913.29	14635.7	16607.1	23512.6	32659	90256	0	332.26	609.857	4203.41	0	3.81699	7.04276	48.2386		501.149	3407.7	12745.6	14459.9	20465.4	28414.1	78559.7	0	289.35	530.711	3677.21	0	3.4725	6.44277	44.0441
575.628	3912.21	14631.6	16602.4	23506.1	32650.2	90231.3	0	332.168	609.692	4201.98	0	3.81358	7.03584	48.1926		507.329	3449.72	12902.8	14638.2	20716.7	28761.4	79524.4	0	292.918	537.214	3721.96	0	3.51097	6.50888	44.5134
575.705	3912.69	14633.3	16604.4	23509.1	32654.5	90242.6	0	332.208	609.77	4202.08	0	3.81042	7.02914	48.1487		512.742	3486.21	13038.2	14790.6	20931.4	29058.4	80350.7	0	296.008	542.77	3760.4	0	3.54331	6.5666	44.9088
575.163	3908.92	14619.2	16588.4	23486.7	32623.9	90156.8	0	331.887	609.194	4197.3	0	3.80048	7.00919	48.0156		516.254	3509.89	13126.4	14890.3	21072.2	29253.9	80892.2	0	298.015	546.421	3785.71	0	3.56533	6.60806	45.191
574.208	3902.35	14594.5	16560.6	23447.6	32570.1	90006.6	0	331.328	608.185	4189.47	0	3.78761	6.98375	47.8452		519.899	3534.61	13218.8	14995.3	21221.1	29460.9	81463.4	0	300.113	550.284	3811.9	0	3.58624	6.64609	45.4529
573.055	3894.43	14564.9	16527.1	23400.6	32505.5	89826.2	0	330.655	606.972	4180.12	0	3.77274	6.95449	47.6488		523.304	3557.72	13305.3	15093.5	21360.3	29654.7	81997.9	0	302.076	553.9	3836.39	0	3.60566	6.68139	45.6961
571.966	3886.98	14537	16495.7	23356.4	32444.8	89656.5	0	330.022	605.832	4171.47	0	3.75993	6.92946	47.4804		526.172	3577.19	13378.1	15176.3	21477.8	29818.1	82448.5	0	303.729	556.949	3857.01	0	3.62187	6.71079	45.8988
570.569	3877.45	14501.4	16455.4	23299.8	32366.6	89439	0	329.213	604.369	4160.67	0	3.74592	6.90244	47.2979		526.563	3579.82	13387.8	15187.2	21493	29839.2	82507.3	0	303.951	557.343	3859.44	0	3.62164	6.70901	45.8897
568.801	3865.41	14456.5	16404.5	23228	32266.9	89162.8	0	328.191	602.506	4147.28	0	3.73026	6.8726	47.0956		526.702	3580.85	13391.9	15192	21500	29848.9	82533.6	0	304.04	557.524	3860.3	0	3.62043	6.70545	45.8684
566.405	3849.09	14395.5	16335.5	23130.6	32132.4	88789	0	326.805	599.987	4129.05	0	3.70806	6.83025	46.8085		526.06	3576.65	13376.5	15175	21476.4	29816.8	82442.5	0	303.687	556.92	3855.81	0	3.61604	6.69664	45.8098
563.49	3829.34	14321.9	16252.4	23013.5	31970.6	88339	0	325.131	596.958	4107.35	0	3.68361	6.78405	46.4944		523.823	3561.64	13321.1	15112.5	21388.5	29695.2	82103.9	0	302.419	554.644	3840.11	0	3.60362	6.67384	45.6534
560.097	3806.28	14235.8	16155.1	22876.6	31781.7	87812.9	0	323.173	593.417	4082.23	0	3.65613	6.73402	46.1497		522.178	3550.36	13278.9	15065.2	21323	29606.6	81852	0	301.459	552.966	3828.03	0	3.59016	6.65468	45.5085
558.254	3793.72	14188.7	16101.7	22800.9	31676.7	87522.7	0	322.106	591.456	4068.52	0	3.64188	6.70726	45.9674		520.449	3538.47	13234.1	15014.2	21250.4	29505.6	81574.2	0	300.448	551.081	3814.79	0	3.5752	6.62556	45.3125
556.745	3783.44	14150.3	16058	22739.1	31590.9	87285.4	0	321.233	589.853	4057.33	0	3.63046	6.68583	45.8214		517.536	3518.58	13159.5	14929.2	21129.9	29337.8	81111.8	0	298.756	547.951	3793.11	0	3.55405	6.58533	45.0395
555.295	3773.58	14113.4	16016.1	22679.8	31508.5	87057.7	0	320.395	588.314	4046.73	0	3.62077	6.66788	45.6985		513.832	3493.32	13064.8	14821.6	20977.1	29124.8	80525.4	0	296.609	543.982	3765.77	0	3.52882	6.53775	44.7157
553.777	3763.26	14074.8	15972.3	22617.9	31422.7	86820.3	0	319.52	586.71	4035.56	0	3.60987	6.64753	45.5596		510.182	3468.42	12971.4	14715.1	20825.7	28913.7	79945	0	294.493	540.047	3738.81	0	3.50396	6.49068	44.3959
552.308	3753.28	14037.5	15930.1	22558.3	31340	86591.3	0	318.673	585.166	4024.71	0	3.59887	6.62692	45.419		509.207	3461.85	12946.9	14687.3	20786	28858.2	79792.8	0	293.937	539.015	3731.33	0	3.49414	6.47029	44.2614
550.914	3743.8	14002.1	15890	22501.7	31261.7	86373.9	0	317.868	583.7	4014.35	0	3.58804	6.60654	45.2802		508.19	3455.34	12923.8	14662.3	20752	28812.5	79660	0	293.394	538.149	3724.49	0	3.48636	6.45465	44.1588
550.069	3738.1	13980.9	15866.1	22468.1	31215.2	86244.5	0	317.384	582.83	4008.35	0	3.58303	6.59782	45.2202		507.089	3447.68	12894.9	14630	20707.9	28753.8	79490.4	0	292.741	537.026	3715.88	0	3.47279	6.43459	44.0081
549.683	3735.46	13971	15854.9	22452.4	31193.7	86184.3	0	317.161	582.426	4005.57	0	3.58082	6.59453	45.1948		505.707	3438.12	12858.8	14588.7	20649.1	28671.9	79265.5	0	291.926	535.499	3704.93	0	3.45822	6.40576	43.815
549.338	3733.11	13962.2	15844.9	22438.2	31174.1	86130	0	316.961	582.059	4003.01	0	3.5783	6.58978	45.1624		505.601	3437.26	12855.3	14584.6	20643	28663.4	79242.7	0	291.85	535.341	3703.33	0	3.45214	6.39266	43.7295
548.257	3725.74	13934.6	15813.5	22393.7	31112.3	85959.4	0	316.334	580.904	3995.02	0	3.57074	6.57559	45.0657		507.635	3451.03	12906.8	14642.9	20725.8	28778.5	79560.3	0	293.018	537.488	3717.7	0	3.46193	6.40976	43.8489
546.854	3716.17	13898.7	15772.9	22336.2	31032.5	85738.6	0	315.521	579.413	3984.56	0	3.56013	6.55554	44.9293		508.263	3455.3	12922.7	14661.1	20751.5	28814.4	79659.2	0	293.381	538.156	3722.23	0	3.46554	6.41633	43.8942
544.726	3701.66	13844.4	15711.2	22249	30911.4	85403.8	0	314.289	577.151	3968.73	0	3.5443	6.52565	44.7261		509.139	3461.25	12945	14686.4	20787.4	28864.3	79796.8	0	293.886	539.088	3728.53	0	3.4705	6.42535	43.9563
543.175	3691.11	13804.9	15666.3	22185.3	30822.8	85159.4	0	313.392	575.498	3957.41	0	3.53487	6.5081	44.6061		510.172	3468.26	12971.3	14716.2	20829.7	28923.1	79959.1	0	294.482	540.186	3735.96	0	3.47635	6.43596	44.0294
542.181	3684.35	13779.6	15637.5	22144.3	30765.6	85002.2	0	312.818	574.433	3950.29	0	3.53002	6.49927	44.5453		510.86	3472.95	12988.8	14736.2	20858	28962.6	80067.8	0	294.88	540.921	3740.98	0	3.48064	6.4439	44.0838
541.988	3683.05	13774.7	15631.8	22136.1	30753.7	84970.6	0	312.707	574.216	3949.17	0	3.53155	6.50252	44.5666		511.562	3477.72	13006.7	14756.5	20886.8	29002.7	80178.4	0	295.285	541.669	3746.04	0	3.48466	6.45122	44.1342
543.292	3691.96	13808	15669.5	22189	30826.7	85174	0	313.464	575.585	3959.32	0	3.54538	6.52921	44.7468		511.872	3479.83	13014.6	14765.4	20899.5	29020.3	80227.1	0	295.464	541.999	3748.27	0	3.48642	6.45442	44.1562
545.232	3705.21	13857.6	15725.6	22268.1	30936.1	85477.8	0	314.59	577.632	3974.29	0	3.5646	6.56627	44.9972		510.801	3472.57	12987.4	14734.6	20855.8	28959.5	80059.3	0	294.848	540.865	3740.66	0	3.48101	6.44484	44.0897
547.145	3718.29	13906.5	15781.1	22346.3	31044.3	85778.1	0	315.701	579.655	3989.09	0	3.58367	6.60313	45.246		509.691	3465.06	12959.4	14702.8	20810.7	28896.7	79886.1	0	294.21	539.693	3732.85	0	3.47587	6.43593	44.0273
548.897	3730.26	13951.4	15831.9	22418.2	31143.7	86053.9	0	316.719	581.516	4002.55	0	3.60025	6.63511	45.462		509.609	3464.6	12957.8	14701.2	20808.5	28893.7	79877.4	0	294.173	539.637	3732.82	0	3.47913	6.44322	44.0743
550.578	3741.77	13994.5	15880.8	22487.2	31239.3	86318.8	0	317.697	583.303	4015.54	0	3.61662	6.66677	45.6757		511.066	3474.65	12995.7	14744.5	20870.1	28979.6	80113.3	0	295.029	541.238	3744.22	0	3.49365	6.47174	44.2658
552.185	3752.76	14035.7	15927.6	22553.3	31330.9	86572.4	0	318.631	585.016	4027.84	0	3.63128	6.69499	45.8664		514.408	3497.48	13081.4	14841.9	21007.4	29168.3	80638.9	0	296.971	544.783	3768.95	0	3.51819	6.51368	44.5687
552.882	3757.51	14053.5	15947.8	22582	31370.9	86682.6	0	319.035	585.761	4032.98	0	3.63596	6.70377	45.9263		519.142	3529.32	13199.4	14974.3	21193.4	29425.5	81355.9	0	299.665	549.596	3802.22	0	3.5462	6.56248	44.9022
552.895	3757.6	14053.8	15948.2	22582.6	31371.7	86684.6	0	319.042	585.775	4033.02	0	3.6356	6.70302	45.9213		523.394	3558.05	13306.6	15095.9	21365.9	29665.8	82018.5	0	302.102	554.076	3833.44	0	3.57632	6.62091	45.296
552.188	3752.76	14035.7	15927.6	22553.5	31331.4	86573.2	0	318.631	585.023	4027.6	0	3.62901	6.69031	45.8355		527.398	3585.47	13409.5	15213.1	21532.3	29897.5	82656.5	0	304.434	558.395	3863.64	0	3.60737	6.68099	45.7014
550.985	3744.51	14004.8	15892.6	22504.1	31263.3	86383.7	0	317.929	583.747	4018.04	0	3.6151	6.66315	45.6528		531.708	3614.97	13520.4	15339.4	21711.7	30147.5	83344.4	0	306.943	563.057	3895.97	0	3.64029	6.74403	46.1282
549.509	3734.39	13966.9	15849.7	22443.7	31179.9	86151.7	0	317.07	582.184	4006.41	0	3.59863	6.63109	45.4368		537.735	3655.77	13672.3	15510.7	21952.5	30479.1	84269.7	0	310.402	569.276	3939.02	0	3.67789	6.80725	46.5759
547.628	3721.53	13918.7	15795.1	22366.8	31073.4	85856.3	0	315.977	580.192	3991.88	0	3.58004	6.59521	45.1945		542.502	3687.93	13792.1	15646.3	22144.4	30745.9	85007.3	0	313.128	574.255	3972.96	0	3.70462	6.85658	46.9139
544.644	3701.15	13842.5	15708.7	22244.8	30904.8	85388.3	0	314.246	577.036	3969.02	0	3.552	6.54131	44.83		545.88	3710.83	13877.9	15744	22283.2	30939.5	85539.8	0	315.073	577.864	3997.34	0	3.72427	6.89297	47.163
541.291	3678.26	13756.8	15611.8	22108.3	30716.1	84863.8	0	312.301	573.503	3943.3	0	3.51989	6.47968	44.4131		549.168	3733.17	13961.5	15839	22418.1	31127.7	86057.7	0	316.97	581.37	4021.02	0	3.74256	6.92646	47.3931
537.459	3652.14	13659.2	15501.3	21952.4	30500.7	84265.3	0	310.083	569.47	3914.14	0	3.48486	6.4128	43.9599		552.118	3753.2	14036.4	15924.2	22538.9	31296	86521.4	0	318.67	584.507	4042.15	0	3.75812	6.95459	47.5872
533.707	3626.6	13563.7	15393.1	21799.7	30288.9	83678.7	0	307.914	565.513	3886.1	0	3.45503	6.35639	43.5764		554.366	3768.45	14093.5	15989	22631	31424.2	86874.6	0	319.965	586.898	4058.17	0	3.76947	6.97492	47.728
530.373	3603.92	13479	15297.2	21664.2	30101.1	83158.2	0	305.989	562.003	3861.17	0	3.42799	6.30534	43.2292		552.942	3758.79	14057.3	15947.9	22572.7	31342.9	86650.8	0	319.145	585.383	4048.02	0	3.76232	6.96213	47.6394
529.234	3596.17	13450	15264.4	21618	30037.2	82980.7	0	305.331	560.806	3852.61	0	3.41833	6.28707	43.1049		551.102	3746.3	14010.6	15894.8	22497.3	31238	86361.6	0	318.084	583.426	4034.88	0	3.75286	6.94513	47.5218
533.232	3623.37	13551.6	15379.5	21780.4	30262.1	83604.5	0	307.64	565.013	3882.57	0	3.45132	6.3494	43.5288		548.666	3729.77	13948.7	15824.6	22397.6	31099.2	85979	0	316.681	580.838	4017.48	0	3.74022	6.92239	47.3646
539.507	3666.09	13711.3	15560.4	22035.8	30616.2	84585.7	0	311.268	571.631	3929.53	0	3.50176	6.44486	44.1776		544.457	3701.21	13841.9	15703.2	22225.4	30858.9	85317.6	0	314.256	576.361	3987.37	0	3.71792	6.88216	47.0868
546.969	3716.97	13901.7	15776.1	22340.6	31038.2	85755.6	0	315.589	579.524	3985.78	0	3.5643	6.56389	44.9851		539.554	3667.93	13717.4	15561.6	22024.2	30578.6	84545.9	0	311.431	571.136	3952.24	0	3.6914	6.8342	46.7559
555.024	3772.02	14107.9	16009.9	22670.7	31495.1	87022.4	0	320.267	588.071	4047.37	0	3.63878	6.7068	45.952		534.178	3631.46	13581	15406.6	21804.2	30272.3	83701.6	0	308.334	565.423	3913.89	0	3.66304	6.78348	46.4046
561.849	3818.41	14280.7	16204.4	22942.9	31868.5	88069.3	0	324.202	595.089	4099.18	0	3.70522	6.83017	46.7963		531.317	3612.05	13508.4	15324.2	21687.4	30109.7	83253.2	0	306.687	562.389	3893.53	0	3.64816	6.75709	46.2212
566.278	3848.43	14392.4	16330.2	23119.3	32111	88747.8	0	326.748	599.642	4133.05	0	3.74971	6.91575	47.3746		530.091	3603.74	13477.3	15288.9	21637.3	30040	83060.9	0	305.982	561.089	3884.78	0	3.64162	6.7454	46.1402
568.841	3866.05	14458.6	16405.5	23225.9	32258.8	89156.4	0	328.247	602.405	4153.27	0	3.77733	6.97036	47.7404		530.443	3606.12	13486.2	15298.9	21651.6	30059.9	83115.8	0	306.184	561.46	3887.26	0	3.64335	6.7484	46.1612
570.447	3877.29	14501.3	16454.4	23295.6	32355.9	89422.8	0	329.207	604.216	4166.94	0	3.80167	7.01958	48.0679		531.358	3612.37	13509.7	15325.7	21689.7	30113	83261.9	0	306.716	562.45	3894.04	0	3.6497	6.76058	46.2437
571.675	3885.89	14533.9	16491.8	23348.5	32428.9	89624.8	0	329.942	605.584	4177.71	0	3.82258	7.06033	48.3475		532.531	3620.39	13539.8	15360.1	21738.6	30181.2	83449.3	0	307.398	563.721	3902.71	0	3.65767	6.77575	46.3465
572.66	3892.41	14557.4	16517.1	23382.5	32474	89757.8	0	330.489	606.445	4184.88	0	3.83388	7.07964	48.4787		533.862	3629.48	13574	15399.1	21794.1	30258.8	83662.1	0	308.17	565.167	3912.58	0	3.66685	6.79327	46.4652
573.165	3895.7	14569.3	16530	23399.9	32496.9	89825.3	0	330.765	606.884	4188.77	0	3.84074	7.09296	48.5683		534.946	3636.93	13602	15431.1	21839.8	30323	83837.4	0	308.804	566.358	3920.9	0	3.67599	6.81135	46.5863
573.804	3900.02	14585.3	16547.9	23424.8	32530.8	89921.2	0	331.13	607.524	4193.69	0	3.84714	7.10556	48.6527		536.385	3646.76	13638.9	15473.1	21899.6	30406.3	84066.5	0	309.641	567.91	3931.6	0	3.68609	6.83064	46.717
574.133	3902.29	14593.8	16557.5	23438.1	32549	89972.5	0	331.323	607.867	4196.51	0	3.85223	7.11608	48.7221		538.356	3660.16	13689	15530.1	21980.4	30518.8	84376.5	0	310.778	570.007	3945.78	0	3.69718	6.8508	46.8559
573.501	3898.09	14578.2	16539.9	23413.1	32513.9	89876.1	0	330.968	607.215	4192.66	0	3.85353	7.12026	48.7467		540.286	3673.26	13738.1	15585.8	22059.4	30628.7	84679.7	0	311.89	572.059	3959.64	0	3.70784	6.87009	46.9889
572.428	3890.93	14551.7	16509.9	23370.6	32454.8	89712.7	0	330.363	606.113	4185.75	0	3.85297	7.12129	48.7489		542.024	3685.08	13782.3	15636.2	22130.9	30728.3	84954	0	312.895	573.916	3972.22	0	3.71802	6.8888	47.1173
571.527	3884.92	14529.4	16484.8	23335.3	32405.8	89576.7	0	329.855	605.197	4179.91	0	3.85225	7.12163	48.7474		543.216	3693.22	13812.9	15670.9	22180.3	30796.9	85143.2	0	313.586	575.2	3980.95	0	3.72557	6.90292	47.2137
570.583	3878.61	14506	16458.3	23297.8	32353.9	89432.8	0	329.321	604.227	4173.69	0	3.85071	7.12027	48.7347		543.397	3694.4	13817.2	15675.7	22187	30806.5	85169.6	0	313.686	575.375	3982.02	0	3.72526	6.90178	47.2072
570.09	3875.31	14493.7	16444.5	23278.3	32326.7	89357.5	0	329.041	603.719	4170.43	0	3.84982	7.11935	48.7267		543.323	3693.85	13815	15673.2	22183.3	30801.3	85155.5	0	313.638	575.277	3981.25	0	3.72342	6.8978	47.1813
570.178	3875.9	14495.9	16447	23281.8	32331.6	89371	0	329.091	603.81	4171.01	0	3.84998	7.11952	48.7282		543.01	3691.67	13806.8	15663.7	22169.8	30782.3	85103.8	0	313.452	574.925	3978.73	0	3.72013	6.8911	47.1368
570.633	3878.94	14507.2	16459.7	23299.8	32356.6	89440.4	0	329.349	604.278	4174.03	0	3.8508	7.12037	48.7355		541.292	3680.02	13763.2	15614.2	22099.6	30684.6	84834.3	0	312.463	573.102	3966.47	0	3.71106	6.87483	47.0242
571.145	3882.37	14519.9	16474.1	23320.1	32384.7	89518.2	0	329.639	604.802	4177.39	0	3.85153	7.12088	48.741		539.116	3665.31	13708.3	15552	22011.4	30562	84495.6	0	311.215	570.813	3951.21	0	3.70125	6.8581	46.9064
571.16	3882.44	14520.1	16474.2	23320.1	32384.6	89518.6	0	329.644	604.803	4177.39	0	3.85098	7.11961	48.7328		536.468	3647.37	13641.3	15475.9	21903.6	30412	84081.7	0	309.693	568.015	3932.43	0	3.68792	6.83458	46.7427
571.138	3882.27	14519.4	16473.4	23318.9	32382.8	89514	0	329.629	604.77	4177.18	0	3.85051	7.11862	48.7263		531.715	3615.14	13520.8	15339.1	21709.6	30142.2	83337.3	0	306.957	562.981	3898.49	0	3.66259	6.78928	46.4289
570.707	3879.36	14508.6	16461.1	23301.4	32358.5	89447	0	329.383	604.317	4174.27	0	3.84937	7.11702	48.7142		523.55	3559.81	13314.1	15104.6	21377.3	29679.8	82061.1	0	302.262	554.356	3840.36	0	3.61986	6.71345	45.9022
569.288	3869.83	14473.1	16420.9	23244.5	32279.3	89228.1	0	328.575	602.838	4164.73	0	3.84589	7.11238	48.6783		514.11	3495.87	13074.9	14832.5	20990.5	29139.7	80576.5	0	296.834	544.296	3772.87	0	3.5704	6.62094	45.2718
568.325	3863.38	14449.2	16393.9	23206.4	32226.5	89081.6	0	328.03	601.851	4158.33	0	3.84379	7.10999	48.6588		504.588	3431.08	12832.2	14556.6	20598.7	28593.9	79073.5	0	291.331	534.12	3704.28	0	3.51691	6.52478	44.6068
568.092	3861.82	14443.4	16387.3	23197.2	32213.6	89046	0	327.898	601.612	4156.79	0	3.84332	7.10951	48.6542		495.953	3372.45	12612.9	14307.3	20245.2	28102.2	77717.2	0	286.353	524.945	3642.17	0	3.46749	6.43566	43.9911
568.039	3861.44	14441.9	16385.6	23194.6	32210	89036.4	0	327.865	601.545	4156.32	0	3.8425	7.1078	48.6429		488.536	3322.06	12424.3	14093.2	19941.7	27680	76552.2	0	282.074	517.066	3588.77	0	3.42473	6.35835	43.4576
567.84	3860.09	14436.8	16379.8	23186.4	32198.6	89004.9	0	327.75	601.331	4154.92	0	3.84164	7.1063	48.6325		481.835	3276.55	12254.1	13899.8	19667.4	27298.3	75499.6	0	278.21	509.945	3540.6	0	3.38675	6.28982	42.9842
568.187	3862.5	14446	16390.3	23201.4	32219.1	89061.9	0	327.956	601.721	4157.59	0	3.84484	7.11213	48.6742		480.204	3265.46	12212.6	13852.7	19600.4	27204.9	75242.4	0	277.268	508.204	3528.99	0	3.3785	6.27518	42.8825
567.625	3858.8	14432.3	16374.6	23178.5	32186.5	88974.3	0	327.644	601.118	4153.86	0	3.84528	7.11033	48.667		480.664	3268.58	12224.2	13865.8	19619.1	27230.8	75314.1	0	277.533	508.688	3532.35	0	3.38162	6.28093	42.922
564.571	3837.86	14353.2	16283.8	23048.3	32003.5	88476.2	0	325.86	597.72	4131.99	0	3.83236	7.08783	48.5096		481.043	3271.14	12233.7	13876.6	19634.3	27251.9	75372.7	0	277.75	509.084	3535.13	0	3.38429	6.28588	42.9558
561.685	3818.21	14279.5	16199.9	22929	31837	88018.6	0	324.19	594.619	4111.66	0	3.82042	7.06761	48.3667		480.658	3268.52	12223.9	13865.2	19618	27229.2	75310.6	0	277.527	508.66	3532.46	0	3.38298	6.28374	42.9405
561.544	3817.26	14276	16195.9	22923.3	31829	87996.5	0	324.11	594.469	4110.68	0	3.81983	7.0666	48.3596		480.137	3264.98	12210.6	13850.1	19596.6	27199.3	75228.2	0	277.226	508.102	3528.75	0	3.38029	6.27894	42.9072
561.488	3816.9	14274.6	16194.3	22921.1	31825.9	87988.2	0	324.079	594.413	4110.31	0	3.81961	7.06619	48.3568		479.8	3262.69	12202	13840.4	19582.7	27179.9	75174.9	0	277.032	507.74	3526.34	0	3.37848	6.27571	42.8848
561.327	3815.84	14270.7	16189.8	22914.6	31816.9	87963.4	0	323.989	594.244	4109.21	0	3.81894	7.06499	48.3485		479.35	3259.63	12190.5	13827.3	19563.9	27153.6	75103	0	276.772	507.252	3523.17	0	3.37652	6.27231	42.861
561.241	3815.27	14268.6	16187.5	22911.3	31812.3	87950.7	0	323.941	594.159	4108.64	0	3.81856	7.06429	48.3438		480.98	3270.69	12231.8	13874	19630	27245.1	75356.8	0	277.71	508.963	3535	0	3.38693	6.2914	42.992
561.345	3815.99	14271.3	16190.6	22915.7	31818.5	87967.6	0	324.003	594.274	4109.39	0	3.81901	7.06502	48.349		483.164	3285.51	12287.2	13936.9	19719	27368.6	75698.3	0	278.969	511.27	3550.81	0	3.40047	6.31614	43.1621
563.281	3829.18	14320.9	16247.2	22996.4	31931.2	88276.6	0	325.124	596.372	4123.08	0	3.82717	7.07892	48.447		484.568	3295.04	12322.9	13977.3	19776.3	27448.2	75918.2	0	279.778	512.757	3560.95	0	3.40915	6.33197	43.271
566.706	3852.51	14408.4	16347.1	23138.9	32130.6	88822.8	0	327.107	600.082	4147.2	0	3.84089	7.10214	48.6109		485.416	3300.81	12344.4	14001.8	19810.9	27496.4	76051.3	0	280.267	513.657	3567.08	0	3.41433	6.3414	43.3359
569.283	3869.91	14473.7	16421.9	23246.3	32282.4	89234.6	0	328.584	602.891	4165.06	0	3.84814	7.11739	48.7106		486.45	3307.83	12370.7	14031.6	19853.2	27555.2	76213.5	0	280.863	514.753	3574.52	0	3.42029	6.35217	43.4103
570.739	3879.65	14509.9	16462.7	23304.1	32362.5	89456.6	0	329.409	604.388	4174.73	0	3.851	7.12057	48.7373		486.841	3310.48	12380.6	14042.9	19869.1	27577.4	76274.7	0	281.088	515.167	3577.32	0	3.42248	6.35612	43.4376
571.444	3884.37	14527.4	16482.6	23332.2	32401.6	89564.7	0	329.809	605.117	4179.38	0	3.85214	7.12161	48.7469		486.136	3305.69	12362.7	14022.5	19840.3	27537.3	76164.1	0	280.681	514.419	3572.21	0	3.41791	6.34776	43.3802
571.558	3885.13	14530.2	16485.7	23336.5	32407.6	89581.5	0	329.872	605.23	4180.03	0	3.85146	7.11995	48.7364		484.6	3295.26	12323.7	13978.3	19777.6	27450.3	75923.5	0	279.796	512.794	3561.12	0	3.40855	6.33071	43.2628
570.726	3879.49	14509.1	16461.7	23302.5	32360.3	89451	0	329.394	604.347	4174.21	0	3.84766	7.11348	48.6909		482.645	3281.99	12274.1	13922	19697.9	27339.5	75617.4	0	278.669	510.725	3547.01	0	3.39686	6.30946	43.1164
550.5	3742.1	13995.3	15878.6	22476.7	31212.8	86281	0	317.729	582.923	4027.11	0	3.71907	6.87627	47.0651		481.572	3274.71	12246.9	13891.1	19654.1	27278.7	75449.5	0	278.051	509.59	3539.28	0	3.39048	6.29785	43.0365
																483.904	3290.53	12306	13958.3	19749.4	27411.2	75815.2	0	279.395	512.063	3556.04	0	3.40387	6.32208	43.2036
																488.258	3320.08	12416.5	14083.7	19927.2	27658.4	76497.5	0	281.903	516.676	3587.38	0	3.42912	6.3678	43.519
																492.084	3346.05	12513.6	14193.9	20083.3	27875.4	77096.7	0	284.108	520.727	3614.94	0	3.45168	6.40875	43.8013
																495.534	3369.47	12601.2	14293.3	20224.2	28071.3	77637.6	0	286.096	524.383	3639.78	0	3.47184	6.44528	44.0531
																501.371	3409.08	12749.3	14461.6	20462.7	28403.2	78553.2	0	289.459	530.576	3681.64	0	3.50427	6.50366	44.4567
																507.057	3447.66	12893.6	14625.4	20695	28726.5	79444.8	0	292.734	536.607	3722.42	0	3.53606	6.56095	44.8525
																512.439	3484.19	13030.2	14780.5	20914.9	29032.4	80288.9	0	295.835	542.314	3761.03	0	3.56615	6.61515	45.227
																514.749	3499.86	13088.8	14847.1	21009.3	29163.7	80651.2	0	297.165	544.765	3777.57	0	3.57888	6.63805	45.3854
																515.433	3504.5	13106.2	14866.8	21037.3	29202.6	80758.4	0	297.559	545.49	3782.47	0	3.58263	6.64479	45.432
																516.632	3512.64	13136.6	14901.3	21086.2	29270.8	80946.4	0	298.25	546.761	3791.06	0	3.58929	6.65677	45.5148
																518.459	3525.04	13183	14954	21160.9	29374.5	81232.8	0	299.302	548.698	3804.18	0	3.59968	6.67554	45.6444
																519.837	3534.4	13218	14993.7	21217.2	29452.9	81449.1	0	300.097	550.161	3814.11	0	3.60793	6.69053	45.7476
																521.47	3545.48	13259.5	15040.9	21284.2	29546.1	81705.9	0	301.038	551.899	3825.83	0	3.61745	6.70775	45.8664
																523.32	3558.02	13306.3	15094.2	21359.8	29651.5	81996.1	0	302.102	553.864	3839.08	0	3.62781	6.72638	45.9952
																523.137	3556.78	13301.7	15088.8	21352.2	29641	81967.2	0	301.996	553.668	3837.78	0	3.62698	6.72491	45.9849
																523.709	3560.65	13316.2	15105.3	21375.6	29673.5	82056.8	0	302.325	554.274	3841.86	0	3.63005	6.7304	46.0229
																525.114	3570.19	13351.8	15145.8	21433	29753.5	82277.3	0	303.135	555.766	3851.9	0	3.63756	6.74387	46.1162
																536.335	3646.47	13637.9	15472.1	21898.1	30404.4	84060.8	0	309.616	567.873	3931.47	0	3.68719	6.83327	46.7337
																555.865	3778.49	14130.8	16031.2	22691	31507.7	87105	0	320.815	588.457	4067.48	0	3.76868	6.96909	47.6982
																552.684	3756.9	14050.1	15939.6	22560.8	31326.2	86605.2	0	318.983	585.074	4045.22	0	3.75542	6.94679	47.5403
																531.709	3614.93	13519.1	15335.8	21702.5	30128.6	83311.8	0	306.933	562.763	3898.82	0	3.67038	6.80202	46.5204
																549.577	3735.89	13971.6	15850.4	22434.3	31150.1	86119.8	0	317.2	581.789	4023.6	0	3.74272	6.92572	47.3905
																574.911	3907.5	14613.3	16579.9	23470.6	32595.1	90096.8	0	331.765	608.718	4200.95	0	3.84758	7.10505	48.6522
																550.25	3740.36	13988	15868.8	22460	31185.7	86219.3	0	317.577	582.455	4028.24	0	3.74645	6.93211	47.435
																536.15	3644.84	13630.4	15461.6	21880.1	30374.9	83994.7	0	309.467	567.365	3929.81	0	3.69123	6.83735	46.7691
																556.504	3782.78	14146.7	16049.1	22715.9	31542.2	87201.3	0	321.178	589.101	4072.6	0	3.7766	6.98533	47.8055
																559.806	3805.17	14230.5	16144.3	22851.2	31730.6	87720.3	0	323.079	592.614	4095.98	0	3.79201	7.01251	47.9947
																546.225	3713.68	13889.6	15758.5	22305.1	30972	85622.1	0	315.325	578.45	4002.45	0	3.73986	6.92943	47.3948
																542.566	3688.6	13794.6	15648.5	22145.7	30744.8	85012.9	0	313.188	574.263	3975.95	0	3.72573	6.89829	47.1939
																544.686	3703.4	13851.6	15715.4	22243.4	30884.1	85383.9	0	314.456	576.832	3992.1	0	3.73588	6.92009	47.343
																546.494	3715.3	13895.2	15764.4	22313.1	30982.5	85653.5	0	315.458	578.651	4003.5	0	3.73667	6.92134	47.3444
																547.932	3724.73	13929.8	15802.9	22366.8	31056.3	85861.1	0	316.252	580.037	4012.3	0	3.73724	6.91785	47.3309
																551.029	3745.66	14007.8	15891.4	22492.1	31230.4	86342.2	0	318.027	583.287	4033.85	0	3.75064	6.93985	47.4881
																554.298	3767.8	14090.6	15985.3	22625.4	31416	86854	0	319.906	586.75	4056.83	0	3.76549	6.96516	47.6664
																557.513	3789.6	14172.1	16078	22757	31599.4	87358.9	0	321.756	590.167	4079.54	0	3.7803	6.99102	47.8471
																557.317	3788.3	14167.4	16072.6	22749.4	31588.8	87329.6	0	321.647	589.97	4078.44	0	3.78087	6.99323	47.8596
																556.11	3780.22	14137.3	16038.7	22701.4	31522.2	87145.2	0	320.963	588.726	4070.45	0	3.77781	6.98979	47.8308
																555.908	3778.98	14133	16034	22695	31513.6	87120.2	0	320.86	588.563	4069.62	0	3.77977	6.99516	47.8636
																556.578	3783.65	14150.7	16054.5	22724.4	31554.9	87232.4	0	321.259	589.33	4074.95	0	3.78607	7.00801	47.9489
																555.305	3775.28	14120	16020.2	22676.1	31487	87045.1	0	320.554	588.073	4067.08	0	3.78645	7.01038	47.9689
																553.961	3765.98	14084.4	15978.3	22614.4	31398.6	86810.9	0	319.759	586.446	4057.06	0	3.78227	6.99939	47.8945
																552.855	3758.28	14055.2	15944.7	22566.3	31331.3	86627.2	0	319.101	585.194	4048.86	0	3.77652	6.98957	47.8248
																563.153	3828.43	14318.7	16245.8	22995.9	31932.3	88273.1	0	325.065	596.377	4122.12	0	3.82134	7.06945	48.3825
																562.693	3825.21	14306.4	16231.7	22976.3	31906	88198.4	0	324.789	595.874	4118.46	0	3.81655	7.06209	48.3247
																550.351	3741.44	13992.5	15873.7	22465.9	31191.8	86241.3	0	317.674	582.589	4031.43	0	3.76475	6.96915	47.6822
																546.988	3718.57	13906.8	15776.2	22327.5	30998.8	85710.1	0	315.731	578.992	4007.54	0	3.74867	6.94108	47.486
																546.233	3713.54	13888.2	15755.4	22298.1	30958.2	85597.1	0	315.307	578.231	4002.25	0	3.74427	6.93284	47.4299
																545.223	3706.89	13863.8	15728.1	22260.1	30906.1	85450.3	0	314.746	577.253	3995.32	0	3.73878	6.92275	47.3608
																544.724	3703.44	13851.1	15714.3	22241.9	30882.6	85379.5	0	314.454	576.798	3991.67	0	3.7333	6.91668	47.3092
																546.375	3714.51	13892.2	15760.8	22307.5	30974	85632.2	0	315.391	578.5	4002.77	0	3.73782	6.92284	47.3564
																551.672	3750.51	14027.1	15914.2	22525.3	31277.5	86467.8	0	318.449	584.159	4040.83	0	3.7668	6.97548	47.7191
																556.306	3782.06	14145.3	16048.3	22714.9	31539.9	87195	0	321.129	589.069	4073.98	0	3.79227	7.01747	48.0204
																558.219	3794.81	14192.2	16100.9	22788.7	31641.7	87479.6	0	322.206	590.975	4087.02	0	3.80132	7.03303	48.1283
																559.669	3804.64	14229	16142.7	22848	31724.5	87707.4	0	323.04	592.518	4097.2	0	3.80767	7.04403	48.2053
																565.002	3840.88	14364.8	16297.6	23068.7	32033	88553.5	0	326.119	598.261	4134.69	0	3.82967	7.08162	48.4699
																564.594	3838.18	14355.2	16287.2	23054.6	32014.1	88498.4	0	325.893	597.901	4132.13	0	3.8272	7.07911	48.4504
																552.952	3759.11	14058.6	15948.9	22572.5	31340.1	86650.4	0	319.175	585.357	4049.87	0	3.77747	6.99083	47.8351
																550.172	3740.14	13987.3	15867.5	22456.6	31178.2	86206.3	0	317.562	582.343	4029.95	0	3.76379	6.96654	47.6661
																548.55	3729.16	13946.3	15820.9	22390.4	31085.9	85952	0	316.63	580.621	4018.47	0	3.75586	6.95235	47.5679
																545.607	3709.14	13871.2	15735.4	22268.9	30916.4	85486	0	314.929	577.463	3997.43	0	3.74092	6.92577	47.3832
																541.413	3680.58	13764.2	15613.7	22096.1	30675.8	84823.2	0	312.502	572.975	3967.42	0	3.71903	6.88718	47.1142
																536.521	3647.43	13640.4	15473.1	21896.9	30398.6	84058.3	0	309.689	567.804	3932.73	0	3.69429	6.84401	46.8127
																532.845	3622.39	13546.4	15366	21744.5	30186.2	83474.4	0	307.561	563.845	3906.14	0	3.67344	6.80543	46.5481
																567.428	3856.98	14424.9	16366.3	23168	32174.3	88934.5	0	327.482	600.865	4148.43	0	3.8142	7.04616	48.2427
																558.415	3796.02	14197.5	16108.9	22804	31669.2	87536.3	0	322.312	591.43	4084.83	0	3.76741	6.96719	47.684
																508.385	3456.69	12927.4	14663.7	20749.2	28801.6	79652.7	0	293.5	538.011	3732.04	0	3.54444	6.57629	44.9579
																498.266	3387.97	12670.3	14371.6	20335.1	28225.6	78063.6	0	287.665	527.263	3659.52	0	3.48976	6.47798	44.2779
																491.746	3343.73	12504.8	14183.8	20068.9	27855.2	77041.6	0	283.909	520.352	3612.7	0	3.45271	6.41109	43.816
																486.959	3311.25	12383.4	14046	19873.5	27583.5	76291.6	0	281.152	515.281	3578.29	0	3.42521	6.36138	43.4729
																482.383	3280.19	12267.2	13914.1	19686.6	27323.5	75574.3	0	278.516	510.431	3545.37	0	3.39875	6.31348	43.1425
																480.122	3264.84	12209.9	13849	19594.2	27195.1	75219.7	0	277.213	508.033	3529.1	0	3.38566	6.28978	42.979
																478.287	3252.39	12163.3	13796.1	19519.3	27090.9	74932.1	0	276.156	506.088	3515.89	0	3.375	6.27046	42.8458
																476.625	3241.11	12121.2	13748.3	19451.6	26996.7	74672.1	0	275.199	504.331	3503.93	0	3.36517	6.25265	42.723
																472.696	3214.45	12021.4	13635.1	19291.2	26773.7	74056.5	0	272.935	500.17	3475.62	0	3.34203	6.21069	42.4337
																468.146	3183.56	11906	13504	19105.5	26515.5	73343.6	0	270.313	495.35	3442.82	0	3.31514	6.16187	42.0972
																462.941	3148.24	11773.9	13354.1	18893.1	26220.2	72528.2	0	267.315	489.838	3405.28	0	3.28416	6.10559	41.7095
																456.924	3107.4	11621.2	13180.8	18647.5	25878.6	71585.3	0	263.848	483.463	3361.84	0	3.2479	6.03962	41.2552
																450.051	3060.74	11446.7	12982.7	18366.7	25488.3	70507.8	0	259.887	476.178	3312.18	0	3.20621	5.96371	40.7326
																442.325	3008.28	11250.5	12760.1	18051.4	25050	69297.2	0	255.433	467.996	3256.33	0	3.15909	5.87784	40.1416
																435.108	2959.28	11067.4	12552.3	17757.3	24641.5	68168.2	0	251.274	460.369	3204.09	0	3.11449	5.79642	39.5816
																430.934	2930.97	10961.6	12432.5	17587.6	24405.9	67516.7	0	248.872	455.968	3173.78	0	3.08781	5.74754	39.2458
																426.182	2898.71	10841	12295.6	17394	24137	66773.3	0	246.133	450.946	3139.34	0	3.05803	5.69308	38.8714
																420.741	2861.77	10702.9	12138.9	17172	23828.7	65921.3	0	242.997	445.188	3099.97	0	3.02468	5.63225	38.4528
																426.227	2899.03	10842.4	12297.4	17397	24142.2	66784.9	0	246.161	451.033	3139.47	0	3.05635	5.68963	38.8486
																431.584	2935.42	10978.5	12452	17616.2	24447.1	67626.1	0	249.25	456.723	3178.1	0	3.08798	5.74707	39.2444
																435.244	2960.25	11071.3	12557.3	17765.2	24654	68198	0	251.359	460.586	3204.59	0	3.11049	5.78814	39.527
																438.758	2984.11	11160.5	12658.5	17908.7	24853.5	68748.8	0	253.384	464.31	3229.95	0	3.13143	5.82621	39.7893
																444.369	3022.23	11303.3	12820.9	18139.3	25175	69633.6	0	256.622	470.302	3270.22	0	3.16273	5.88266	40.1793
																449.592	3057.71	11436	12971.8	18353.4	25473.1	70455.2	0	259.634	475.862	3307.78	0	3.19252	5.93654	40.5511
																453.986	3087.54	11547.6	13098.4	18532.8	25722.5	71143.8	0	262.166	480.517	3339.47	0	3.21848	5.98365	40.8758
																457.739	3113.02	11642.9	13206.6	18686.1	25935.6	71732.3	0	264.33	484.496	3366.53	0	3.24053	6.02364	41.1516
																460.894	3134.52	11723.5	13298.3	18816.4	26117.1	72231.9	0	266.157	487.879	3389.27	0	3.25814	6.05536	41.3708
																463.566	3152.76	11792	13376.5	18927.8	26272.8	72658.9	0	267.707	490.778	3408.54	0	3.27265	6.08129	41.5505
																466.452	3172.35	11865.5	13460.6	19048.2	26441.2	73119.4	0	269.372	493.912	3429.36	0	3.28718	6.10989	41.7481
																469.419	3192.31	11939.8	13544.5	19166.6	26606.1	73575.5	0	271.063	496.987	3449.88	0	3.3001	6.13206	41.8974
																472.134	3210.63	12007.9	13621.5	19275.3	26756.6	73993.3	0	272.615	499.801	3468.72	0	3.31198	6.15113	42.0348
																472.161	3210.88	12009	13622.8	19276.9	26758.5	73999.3	0	272.638	499.84	3468.59	0	3.30922	6.14424	41.9918
																470.434	3199.4	11967	13575.8	19211.3	26668.4	73746	0	271.671	498.15	3456.37	0	3.29677	6.12015	41.8304
																467.424	3178.73	11889.2	13487.8	19087.6	26498.4	73271.6	0	269.911	494.956	3433.82	0	3.27187	6.07802	41.5315
																461.622	3139.14	11740.8	13318.9	18848	26164.9	72352.4	0	266.546	488.734	3390.9	0	3.23107	6.00094	41.0073
																452.451	3076.8	11507.5	13054.1	18473	25644	70913.3	0	261.253	479.007	3324.09	0	3.17269	5.89307	40.2683
																446.183	3034.33	11349	12874.4	18218.3	25289.6	69935	0	257.649	472.397	3278.35	0	3.131	5.81472	39.7346
																443.598	3016.79	11283.5	12800.1	18113.1	25143.4	69531	0	256.161	469.666	3259.7	0	3.11543	5.78644	39.5397
																442.668	3010.47	11259.8	12773.4	18075.8	25092.4	69387.8	0	255.624	468.707	3253.72	0	3.1151	5.78927	39.5511
																443.864	3018.78	11291.3	12809.5	18127.3	25164.7	69585.2	0	256.334	470.05	3263.37	0	3.12793	5.81559	39.7253
																446.709	3038.22	11364.3	12892.6	18245.2	25328.4	70036.8	0	257.987	473.11	3284.64	0	3.14926	5.85637	40.0015
																445.442	3029.79	11332.6	12856	18192	25252.4	69833.3	0	257.271	471.709	3275.81	0	3.14605	5.84627	39.9423
																444.061	3020.3	11296.9	12815.3	18134.3	25172.1	69612.1	0	256.463	470.209	3265.71	0	3.13797	5.83209	39.8434
																443.376	3015.75	11280.5	12797.1	18109	25137.5	69514.2	0	256.083	469.559	3260.92	0	3.13288	5.82227	39.7779
																443.028	3013.25	11271	12786.7	18095.5	25120.5	69461.9	0	255.867	469.228	3258.02	0	3.12672	5.81536	39.719
																442.497	3009.64	11257.4	12771.4	18073.8	25090.5	69378.6	0	255.56	468.664	3254.13	0	3.1232	5.80882	39.6743
																443.474	3016.12	11281.3	12798.1	18111.2	25142.4	69523.4	0	256.107	469.631	3260.47	0	3.1251	5.81019	39.6887
																446.225	3034.56	11349.8	12875.3	18219.9	25292.5	69941.4	0	257.669	472.445	3279.2	0	3.1355	5.8257	39.8036
																441.014	2999.22	11217.7	12725.4	18007.5	24997.1	69125.9	0	254.669	466.931	3241.32	0	3.10226	5.76427	39.3828
																433.044	2945.18	11015.8	12496.4	17683	24546	67880.1	0	250.083	458.511	3183.54	0	3.05188	5.6714	38.746
																424.039	2884.31	10789.2	12240.5	17322.1	24045.8	66492.1	0	244.923	449.161	3118.61	0	2.99293	5.56279	38.0058
																412.306	2804.18	10488.7	11899	16838.9	23376.2	64639.1	0	238.111	436.64	3031.53	0	2.9071	5.40524	36.9193
																395.858	2692.86	10073.3	11428.3	16172.9	22450.9	62080.9	0	228.671	419.366	2911.78	0	2.79728	5.19842	35.5114
																379.738	2582.79	9660.83	10960.1	15510.6	21532.7	59539.8	0	219.315	402.201	2792.52	0	2.67978	4.98378	34.0352
																367.544	2500.35	9353.96	10613.8	15021.8	20854.8	57659.6	0	212.327	389.536	2703.77	0	2.5946	4.82484	32.9588
																360.359	2451.02	9168.3	10401.9	14721.5	20438.2	56509.6	0	208.128	381.748	2649.27	0	2.53477	4.71346	32.1887
																356.021	2421.33	9056.65	10274.5	14540.3	20185.7	55815.6	0	205.603	377.042	2616.52	0	2.50038	4.64653	31.738
																353.231	2402.56	8986.88	10195.7	14429.1	20031.2	55387.6	0	204.013	374.158	2596.11	0	2.48014	4.60679	31.4711
																354.885	2413.87	9029.29	10244	14497.6	20126.6	55650.3	0	204.974	375.937	2608.11	0	2.48992	4.62403	31.5911
																359.36	2444.15	9142.32	10372	14678.6	20377.6	56345.4	0	207.543	380.627	2640.37	0	2.51728	4.67418	31.9357
																368.701	2507.38	9378.2	10639.1	15056.2	20902	57796.5	0	212.906	390.42	2707.9	0	2.5759	4.78288	32.6795
																379.602	2581.51	9655.84	10954.7	15503.9	21524.7	59513.8	0	219.203	402.04	2787.69	0	2.64827	4.91819	33.6029
																392.434	2668.92	9983.22	11326.8	16031.7	22259.3	61538.9	0	226.628	415.742	2882.17	0	2.73633	5.08303	34.7273
																407.782	2773.28	10373	11768.1	16654.3	23120.5	63929.9	0	235.487	431.861	2994.12	0	2.84105	5.27027	36.0245
																422.588	2873.47	10747.1	12192.1	17254.4	23954.1	66234.6	0	243.987	447.425	3101.43	0	2.93588	5.4478	37.2354
																433.749	2949.6	11032.5	12516.8	17715.5	24596.5	68003.3	0	250.456	459.402	3183.96	0	3.01413	5.59528	38.2392
																445.432	3029.25	11330.5	12854.3	18191.8	25255.3	69831.8	0	257.223	471.732	3269.72	0	3.09646	5.74163	39.2551
																455.417	3096.52	11580.8	13137.3	18591.4	25809.6	71368.2	0	262.921	482.089	3341.56	0	3.15961	5.86057	40.0648
																461.737	3139.7	11743	13322	18853.8	26175.1	72374.1	0	266.593	488.906	3388.5	0	3.20496	5.94693	40.6506
																466.189	3170.15	11857.3	13452.4	19039.3	26434	73085.2	0	269.182	493.728	3421.92	0	3.23932	6.01271	41.0959
																468.727	3187.57	11922.8	13526.8	19143.8	26577.4	73485.7	0	270.665	496.424	3441.23	0	3.2614	6.05099	41.3709
																471.934	3209.33	12003.5	13617.4	19271.1	26753.3	73976.2	0	272.508	499.716	3464.11	0	3.28197	6.08623	41.6119
																475.475	3233.23	12092.7	13718.3	19413.8	26951.2	74524.2	0	274.535	503.415	3489.45	0	3.30269	6.12405	41.872
																478.352	3252.71	12165.4	13800.8	19530.5	27113.2	74972.2	0	276.187	506.44	3510.1	0	3.31943	6.15445	42.0815
																480.951	3270.28	12231	13875	19635.4	27258.8	75375.4	0	277.677	509.161	3528.74	0	3.33466	6.18228	42.2729
																486.06	3304.76	12359.4	14020.4	19840.9	27544.1	76165.2	0	280.601	514.489	3565.78	0	3.36809	6.24579	42.704
																493.207	3353.42	12541.7	14227.7	20135.1	27953.4	77293.5	0	284.735	522.125	3618.01	0	3.41415	6.33167	43.2905
																501.963	3412.99	12764.9	14481.5	20495.2	28454.9	78675.2	0	289.795	531.479	3681.71	0	3.46885	6.43263	43.9824
																510.85	3473.5	12991.5	14739.1	20860.8	28963.9	80077.8	0	294.936	540.97	3746.84	0	3.52732	6.5416	44.7268
																519.503	3532	13209.2	14984.5	21205.9	29439.8	81404.8	0	299.894	549.889	3808.83	0	3.58146	6.63576	45.3857
																527.684	3587.46	13416.6	15220	21539.8	29904.4	82686.3	0	304.601	558.558	3867.88	0	3.63044	6.72638	46.0061
																536.17	3645.15	13632.6	15465.7	21888.8	30390.7	84025.2	0	309.501	567.625	3929.19	0	3.67987	6.81696	46.6284
																543.34	3693.82	13814.6	15672.5	22182.1	30799.2	85151.1	0	313.633	575.241	3980.58	0	3.71885	6.88734	47.1143
																547.625	3722.91	13923.5	15796.2	22357.6	31043.7	85824.8	0	316.103	579.8	4011.28	0	3.74192	6.92902	47.402
																550.032	3739.29	13984.8	15866	22456.7	31181.7	86205	0	317.494	582.375	4028.65	0	3.75549	6.95388	47.5728
																550.86	3744.94	14006.1	15890.1	22491.1	31229.7	86336.7	0	317.974	583.268	4034.72	0	3.7607	6.96365	47.6394
																552.248	3754.37	14041.4	15930.3	22548.1	31309.2	86555.6	0	318.775	584.75	4044.66	0	3.76806	6.97696	47.7312
																554.474	3769.47	14097.9	15994.6	22639.3	31436.3	86905.6	0	320.058	587.12	4060.47	0	3.77903	6.99641	47.8664
																558.008	3793.39	14187.2	16096	22783.3	31636.8	87458.4	0	322.087	590.86	4085.23	0	3.79423	7.02244	48.0494
																560.649	3811.29	14254.2	16172.2	22891.5	31787.7	87873.5	0	323.607	593.671	4103.83	0	3.80608	7.0431	48.1938
																562.221	3821.94	14294.1	16217.5	22955.9	31877.4	88120.5	0	324.511	595.344	4114.85	0	3.81271	7.0545	48.2738
																563.359	3829.63	14322.8	16250.1	23002.1	31941.9	88298	0	325.163	596.545	4122.7	0	3.81667	7.06088	48.3197
																564.49	3837.25	14351.2	16282.3	23047.9	32005.6	88473.7	0	325.809	597.732	4130.41	0	3.82006	7.06602	48.3575
																565.778	3845.93	14383.6	16319	23100	32078.2	88673.9	0	326.545	599.087	4139.17	0	3.82375	7.07153	48.3982
																567.794	3859.62	14434.8	16377.5	23183.2	32194.5	88993	0	327.707	601.251	4153.33	0	3.83206	7.08598	48.4993
																568.783	3866.32	14459.9	16405.9	23223.5	32250.5	89147.7	0	328.276	602.298	4160.25	0	3.8364	7.0932	48.5507
																569.313	3869.89	14473.2	16421.1	23245	32280.4	89230.1	0	328.579	602.855	4163.91	0	3.83848	7.09661	48.575
																569.351	3870.15	14474.2	16422.1	23246.5	32282.5	89236	0	328.601	602.895	4164.18	0	3.83862	7.09684	48.5767
																567.675	3858.87	14432.2	16374.6	23179.2	32188.9	88977.2	0	327.646	601.147	4152.81	0	3.83369	7.08963	48.5229
																566.429	3850.43	14400.6	16338.7	23128.2	32117.8	88781.5	0	326.929	599.821	4144.16	0	3.82898	7.08192	48.4677
																565.859	3846.57	14386.1	16322.2	23104.6	32084.9	88691.3	0	326.601	599.21	4140.15	0	3.82657	7.07771	48.4383
																565.618	3844.95	14380.1	16315.4	23095	32071.5	88654.3	0	326.464	598.96	4138.55	0	3.82611	7.07721	48.4341
																564.947	3840.43	14363.3	16296.2	23067.9	32033.7	88550.1	0	326.081	598.255	4133.99	0	3.82422	7.07439	48.4133
																563.949	3833.67	14338	16267.5	23027	31976.7	88393.4	0	325.507	597.194	4127.05	0	3.82043	7.06806	48.3684
																562.759	3825.61	14307.8	16233.2	22978.2	31908.6	88206.1	0	324.822	595.924	4118.71	0	3.81547	7.05953	48.3085
																562.548	3824.19	14302.5	16227.2	22969.7	31896.8	88173.5	0	324.702	595.704	4117.28	0	3.81489	7.05869	48.3022
																562.538	3824.13	14302.3	16227	22969.4	31896.4	88172.3	0	324.697	595.696	4117.24	0	3.815	7.05894	48.3038
																562.644	3824.83	14304.9	16229.9	22973.6	31902.2	88188.3	0	324.757	595.804	4117.92	0	3.81512	7.05899	48.3045
																563.685	3831.84	14331.1	16259.5	23015.6	31960.7	88349.6	0	325.351	596.895	4125.01	0	3.81822	7.06367	48.339
																564.907	3840.12	14362	16294.7	23065.6	32030.5	88541.7	0	326.053	598.196	4133.53	0	3.82297	7.07166	48.3955
																565.767	3845.93	14383.7	16319.4	23100.7	32079.4	88676.2	0	326.546	599.107	4139.46	0	3.82592	7.07645	48.4298
																566.149	3848.5	14393.3	16330.3	23116.2	32100.9	88735.6	0	326.765	599.508	4142.06	0	3.82698	7.07802	48.4415
																566.22	3848.95	14394.9	16332.1	23118.6	32104.2	88745	0	326.802	599.571	4142.39	0	3.82631	7.07636	48.4311
																566.722	3852.39	14407.9	16346.9	23139.7	32133.8	88826	0	327.094	600.121	4146.05	0	3.82915	7.08168	48.4674
																566.945	3853.94	14413.8	16353.7	23149.5	32147.6	88863.4	0	327.227	600.377	4147.8	0	3.83115	7.08572	48.4943
																566.457	3850.68	14401.7	16340	23130.2	32120.8	88789.1	0	326.951	599.876	4144.6	0	3.83059	7.08548	48.4908
																565.919	3847.08	14388.3	16324.8	23108.7	32090.9	88706.6	0	326.646	599.319	4141.03	0	3.82957	7.08435	48.4813
																565.003	3840.9	14365.2	16298.7	23071.6	32039.1	88564	0	326.123	598.356	4134.79	0	3.8269	7.08031	48.4516
																565.583	3844.85	14380.1	16315.6	23095.8	32072.3	88655.9	0	326.458	598.98	4138.92	0	3.82972	7.08497	48.4867
																566.382	3850.26	14400.2	16338.5	23128.3	32118	88781.1	0	326.917	599.827	4144.42	0	3.83252	7.08968	48.5182
																567.633	3858.65	14431.5	16373.8	23178.2	32187.6	88973.3	0	327.627	601.123	4152.82	0	3.83568	7.09396	48.5511
																567.721	3859.26	14433.8	16376.6	23182.1	32193.1	88988.3	0	327.68	601.225	4153.52	0	3.83674	7.09606	48.5651
																567.103	3855.13	14418.5	16359.3	23157.8	32159.4	88894.8	0	327.331	600.596	4149.47	0	3.83605	7.0958	48.561
																566.105	3848.45	14393.7	16330.9	23116.8	32100.9	88737.1	0	326.766	599.518	4142.73	0	3.83431	7.09061	48.532
																565.266	3842.69	14371.7	16305.5	23080.2	32049.3	88597.5	0	326.273	598.562	4136.64	0	3.83124	7.08473	48.4908
																564.828	3839.67	14360.3	16292.4	23061.4	32022.7	88525.3	0	326.015	598.07	4133.47	0	3.82939	7.0815	48.4682
																564.586	3838.01	14354	16285.2	23051.1	32008.2	88485.9	0	325.874	597.801	4131.75	0	3.82841	7.07985	48.4565
																564.492	3837.37	14351.6	16282.4	23047.1	32002.7	88470.7	0	325.819	597.698	4131.1	0	3.82808	7.07937	48.4529
																564.484	3837.31	14351.4	16282.2	23046.7	32002.2	88469.4	0	325.814	597.688	4131.04	0	3.82805	7.07932	48.4526
																564.484	3837.31	14351.4	16282.2	23046.7	32002.2	88469.4	0	325.814	597.688	4131.04	0	3.82805	7.07932	48.4526
																564.484	3837.31	14351.4	16282.2	23046.7	32002.2	88469.4	0	325.814	597.688	4131.04	0	3.82805	7.07932	48.4526
																563.184	3828.41	14317.8	16243.7	22991.7	31925	88258.7	0	325.057	596.253	4121.76	0	3.82242	7.0695	48.3839
																561.462	3816.68	14273.8	16193.5	22920.2	31825.3	87984.9	0	324.06	594.396	4109.6	0	3.81515	7.05704	48.2962
																560.234	3808.34	14242.6	16158	22869.8	31754.9	87791.4	0	323.352	593.085	4100.98	0	3.81001	7.04832	48.2346
																560.462	3809.89	14248.4	16164.6	22879.2	31768	87827.2	0	323.483	593.328	4102.58	0	3.81097	7.04995	48.2461
																562.696	3825.08	14305.3	16229.4	22971.4	31896.9	88181.1	0	324.774	595.728	4118.32	0	3.82052	7.06634	48.3614
																562.726	3825.35	14306.5	16230.9	22973.5	31899.7	88188.8	0	324.798	595.781	4118.67	0	3.82089	7.06716	48.3669
																561.533	3817.31	14276.5	16196.9	22925.2	31832.4	88003.4	0	324.117	594.527	4110.4	0	3.81601	7.05877	48.308
																560.501	3810.33	14250.4	16167.2	22883.1	31773.6	87841.6	0	323.524	593.431	4103.19	0	3.81167	7.05121	48.2552
																560.337	3809.2	14246.2	16162.4	22876.1	31763.8	87815	0	323.428	593.25	4102.01	0	3.81097	7.04998	48.2466
																562.675	3825.01	14305.2	16229.4	22971.4	31896.8	88180.8	0	324.769	595.727	4118.31	0	3.82068	7.06681	48.3644
																563.104	3827.89	14315.9	16241.6	22988.7	31921	88247.3	0	325.013	596.178	4121.27	0	3.82237	7.06964	48.3844
																562.702	3825.18	14305.8	16230.1	22972.4	31898.2	88184.7	0	324.784	595.753	4118.49	0	3.82078	7.06697	48.3656
																562.828	3826.09	14309.4	16234.3	22978.5	31906.7	88207.6	0	324.862	595.911	4119.47	0	3.82131	7.06796	48.3723
																563.567	3831.05	14327.8	16255.1	23007.9	31947.6	88320.8	0	325.282	596.674	4124.47	0	3.82377	7.07156	48.399
																556.135	3780.57	14138.7	16039.9	22701.9	31520.7	87147.1	0	320.995	588.721	4072.2	0	3.79225	7.01771	48.0199
																554.499	3769.45	14097.1	15992.6	22634.8	31427.3	86889.5	0	320.05	586.978	4060.65	0	3.78484	7.00489	47.93
																554.814	3771.59	14105.1	16001.7	22647.7	31445.4	86939.2	0	320.232	587.314	4062.88	0	3.78629	7.00743	47.9476
																556.987	3786.33	14160.3	16064.4	22736.8	31569.5	87281.1	0	321.484	589.629	4078.2	0	3.79602	7.02437	48.0661
																557.588	3790.41	14175.5	16081.8	22761.5	31603.8	87375.5	0	321.829	590.269	4082.42	0	3.79867	7.02893	48.0981
																508.899	3460.05	12940.5	14680	20775.4	28842.6	79751.5	0	293.787	538.732	3732.28	0	3.51634	6.51856	44.5758

## Sheet: (7) Melt_Asynch
Name:			Ih Artsan	Jargalant
Present temperature (at headwall):			5.4 ℃	4.9 ℃
Elevation of the distal moraine:			3222.2 m	2997.2 m
Basal shear stress of initial glacier:			100 kPa	200 kPa
Time interval:			22-16 ka	22-16 ka
Melt along profile of Ih Artsan valley in asynchronous scenario											Melt along profile of Jargalant valley in asynchronous scenario
22-21 ka	21-20 ka	20-19 ka	19-18 ka	18-17 ka	17-16 ka	22-16 ka	June 21, 22 ka	June 21, 20 ka	June 21, the present-day		22-21 ka	21-20 ka	20-19 ka	19-18 ka	18-17 ka	17-16 ka	22-16 ka	June 21, 22 ka	June 21, 20 ka	June 21, the present-day
520.698	3539.78	13238.3	15018.5	21256.4	29514.2	81598.3	0	3.56775	45.2071		0	0	161.971	473.765	4313.59	11439.2	16154.1	0	0	39.7479
516.417	3510.65	13129.2	14894.4	21080.3	29268.4	80922.1	0	3.54275	44.8912		0	0	156.649	458.184	4171.51	11061.8	15621.4	0	0	38.6396
514.063	3494.59	13068.9	14825.7	20982.1	29131	80546	0	3.52818	44.7034		0	0	152.149	445.009	4051.33	10742.3	15170.6	0	0	37.6707
512.795	3485.9	13036.2	14788	20928.2	29055.1	80339.5	0	3.51973	44.5907		0	0	148.73	434.994	3959.96	10499.5	14827.9	0	0	36.9222
511.361	3476.12	12999.4	14745.8	20867.8	28970.4	80108.5	0	3.51082	44.4734		0	0	146.266	427.785	3894.24	10325	14581.6	0	0	36.398
508.145	3454.3	12917.8	14653.3	20736.7	28788.1	79605	0	3.49337	44.2596		0	0	144.079	421.385	3835.93	10170.2	14363.1	0	0	35.9516
504.832	3431.85	12833.9	14558.2	20602.2	28601.4	79088.6	0	3.47556	44.0432		0	0	142.396	416.465	3791.11	10051.3	14195.2	0	0	35.5967
500.539	3403.01	12726.9	14437.8	20432.9	28367.9	78437.2	0	3.45524	43.81		0	0	141.215	413.013	3759.71	9967.98	14077.5	0	0	35.3358
496.063	3373.3	12617.6	14315.9	20262.8	28134.7	77780.6	0	3.44014	43.6545		0	0	140.929	412.172	3752.01	9947.57	14048.7	0	0	35.2973
492.827	3352	12539.3	14227	20135.5	27954	77289.8	0	3.43552	43.566		0	0	142.104	415.611	3783.36	10030.8	14166.2	0	0	35.5713
493.951	3358.94	12562.7	14250.9	20165.9	27992.8	77411.8	0	3.44069	43.6097		0	0	144.227	421.825	3840	10181.1	14378.4	0	0	36.0348
494.316	3360.89	12568.5	14255.8	20171.2	27998.9	77435.8	0	3.44071	43.6122		0	0	147.222	430.598	3920.03	10393.8	14678.5	0	0	36.7259
495.094	3365.88	12586.6	14276.2	20200.2	28039.8	77548	0	3.44452	43.6725		0	0	151.514	443.178	4034.77	10698.2	15108.4	0	0	37.8169
496.33	3374.27	12618.3	14312.5	20252.3	28113	77747.2	0	3.45241	43.785		0	0	156.688	458.262	4171.68	11060.6	15620.5	0	0	38.9274
497.062	3379.42	12638.1	14335.8	20286.3	28161.5	77876.4	0	3.45865	43.8782		0	0	162.226	474.48	4319.62	11453.7	16175.2	0	0	40.0963
499.71	3397.79	12707.8	14416.1	20401.5	28323.4	78316.6	0	3.47838	44.1438		0	0	165.524	484.148	4407.93	11688.8	16506.8	0	0	40.9075
502.633	3417.85	12783.4	14502.6	20524.9	28495.8	78788.9	0	3.49832	44.4018		0	0	168.323	492.307	4481.83	11883.5	16782.3	0	0	41.5506
507.193	3448.7	12898.5	14632.9	20709	28751.1	79496.2	0	3.52305	44.7038		0	0	170.847	499.691	4549.16	12062.5	17034.9	0	0	42.084
513.713	3492.65	13062	14817.5	20969.4	29111.6	80497.4	0	3.55612	45.0993		0	0	171.486	501.572	4566.4	12108.5	17099.7	0	0	42.2545
519.75	3533.43	13214	14989.4	21212.1	29447.9	81430	0	3.58762	45.4783		0	0	169.465	495.66	4512.53	11965.4	16897.8	0	0	41.9199
526.246	3577.42	13378	15174.9	21474.1	29810.7	82436.4	0	3.62127	45.8757		0	0	167.333	489.43	4455.81	11814.6	16685	0	0	41.5951
532.297	3618.75	13533.2	15351.6	21724.9	30160	83398.3	0	3.65409	46.2783		0	0	165.251	483.299	4399.44	11664	16472.8	0	0	41.2228
536.487	3647.33	13640.6	15474.2	21899.5	30403.6	84067.1	0	3.67627	46.5543		0	0	163.43	477.971	4350.88	11535	16290.8	0	0	40.8606
538.021	3657.85	13680.2	15519.6	21964.6	30494.8	84315.8	0	3.68418	46.6535		0	0	159.749	467.204	4252.76	11274.4	15922.9	0	0	40.0951
539.589	3668.54	13720.3	15565.4	22029.8	30585.9	84565.8	0	3.69221	46.7535		0	0	156.046	456.394	4154.54	11014.3	15555.4	0	0	39.2946
540.765	3676.66	13751	15600.7	22080.4	30657.1	84759.4	0	3.69807	46.827		0	0	154.532	451.95	4114.02	10907	15403.9	0	0	38.8223
541.858	3684.25	13779.9	15633.9	22128.1	30724.5	84941.9	0	3.70346	46.8944		0	0	154.246	451.153	4107.2	10889.6	15379	0	0	38.6858
542.468	3688.33	13795.6	15652.5	22155.3	30763.1	85044.9	0	3.70496	46.9289		0	0	154.149	450.852	4104.32	10882.2	15368.4	0	0	38.561
541.042	3678.54	13758.8	15610.9	22097.8	30685.4	84824.1	0	3.69397	46.8098		0	0	154.605	452.175	4116.28	10913.7	15413	0	0	38.5775
539.546	3668.31	13720.4	15567.1	22035.5	30599.2	84586	0	3.6839	46.6815		0	0	155.515	454.837	4140.51	10978	15503.7	0	0	38.7435
537.223	3652.56	13661.4	15500.2	21940.5	30467.1	84221.6	0	3.67142	46.5269		0	0	158.6	463.874	4222.97	11197.1	15813	0	0	39.4328
534.898	3636.8	13602.5	15433.4	21845.9	30335.5	83858.3	0	3.65959	46.3818		0	0	162.627	475.667	4330.61	11483.3	16216.8	0	0	40.3002
532.928	3623.46	13552.7	15376.9	21765.9	30224.3	83551.1	0	3.64975	46.2618		0	0	165.286	483.445	4401.3	11670.3	16481	0	0	40.9409
529.766	3602.05	13472.8	15286.2	21637.5	30046	83058.2	0	3.63381	46.0668		0	0	167.126	488.795	4449.74	11798.2	16662	0	0	41.349
527.044	3583.61	13403.9	15208.1	21526.8	29892.2	82633.2	0	3.61941	45.8894		0	0	168.106	491.674	4476.09	11868.4	16760.9	0	0	41.622
525.892	3575.89	13375.2	15175.7	21481.1	29827.3	82455.9	0	3.61553	45.8462		0	0	168.14	491.783	4477.19	11871.6	16765.3	0	0	41.6824
525.477	3573.19	13365.4	15164.2	21462.9	29799.7	82386.9	0	3.61668	45.8377		0	0	166.868	488.063	4443.3	11781.6	16638.3	0	0	41.4632
524.561	3567.04	13341.7	15136.3	21422.4	29742.1	82232.9	0	3.61328	45.7745		0	0	164.503	481.137	4380.02	11612.9	16400.5	0	0	41.0401
526.466	3579.81	13389.1	15189.7	21497.5	29846	82522.1	0	3.62338	45.8993		0	0	161.102	471.159	4288.81	11370.1	16058	0	0	40.3842
528.36	3592.52	13436.3	15243.1	21573	29950.5	82812	0	3.63342	46.0235		0	0	157.478	460.548	4192	11112.7	15694.9	0	0	39.667
530.361	3605.91	13485.9	15298.9	21651.4	30058.6	83113.8	0	3.64397	46.1534		0	0	153.929	450.157	4097.23	10860.9	15339.5	0	0	38.9525
533.531	3627.06	13564.2	15386.6	21774.6	30229.1	83589	0	3.66064	46.3604		0	0	150.722	440.767	4011.56	10633.3	15018.3	0	0	38.3069
536.312	3645.75	13633.8	15465.8	21887	30385.9	84020.7	0	3.67582	46.556		0	0	147.952	432.653	3937.49	10436.2	14740.3	0	0	37.7579
537.885	3656.49	13674.2	15512.1	21953.2	30478.8	84274.1	0	3.68539	46.6832		0	0	145.761	426.24	3879.05	10281	14521.2	0	0	37.3196
539.057	3664.49	13704.4	15546.6	22002.7	30548.3	84463.6	0	3.69271	46.7798		0	0	144.239	421.783	3838.39	10173	14368.7	0	0	37.007
540.76	3676.09	13747.9	15596.2	22073.4	30647.2	84734.6	0	3.70251	46.9045		0	0	174.15	509.45	4639.6	12307.3	17378.3	0	0	41.6142
543.854	3696.97	13825.6	15684.1	22197.3	30818.6	85210.9	0	3.71606	47.0594		0	0	172.448	504.451	4593.75	12184.7	17205.7	0	0	41.3296
548.127	3726.05	13934.5	15807.7	22372.7	31062.7	85883.9	0	3.7363	47.3007		0	0	145.722	426.134	3878.3	10280.1	14519.4	0	0	37.093
551.511	3749.15	14021.3	15906.8	22513.7	31259.5	86424.3	0	3.75223	47.4953		0	0	143.446	419.458	3817.1	10116.2	14288.7	0	0	36.7965
551.15	3746.57	14011.3	15895.2	22497	31236.2	86361	0	3.75108	47.4827		0	0	144.134	421.475	3835.52	10165.2	14357.8	0	0	36.9482
552.201	3753.63	14037.6	15925.1	22539.5	31295.5	86524.1	0	3.7566	47.5524		0	0	144.484	422.499	3844.89	10190.2	14393.1	0	0	37.0287
554.375	3768.43	14093.1	15988.3	22629.4	31420.8	86868.7	0	3.76658	47.6736		0	0	144.623	422.905	3848.6	10200.1	14407	0	0	37.0618
556.532	3783.34	14149.7	16053.4	22722.8	31551.9	87225.5	0	3.77472	47.7715		0	0	144.787	423.386	3852.97	10211.7	14423.4	0	0	37.1065
558.402	3796.26	14199.1	16110.8	22806	31670	87542.6	0	3.77985	47.8429		0	0	144.551	422.693	3846.66	10194.9	14399.7	0	0	37.0627
558.113	3794.2	14191.1	16102	22794.6	31655.7	87498.7	0	3.77481	47.7933		0	0	143.754	420.363	3825.42	10138.5	14320.1	0	0	36.8968
557.185	3787.88	14167.4	16075	22756.1	31602.6	87351.8	0	3.76964	47.7288		0	0	170.433	498.532	4539.52	12039.9	17001.6	0	0	40.9953
556.382	3782.44	14147.1	16051.9	22723.3	31556.8	87225.7	0	3.76595	47.684		0	0	179.468	525.029	4782.01	12687	17913.5	0	0	42.1294
555.574	3776.99	14126.8	16028.9	22690.7	31511.1	87100.2	0	3.76335	47.6545		0	0	144.264	421.889	3839.79	10178.1	14375.3	0	0	36.8525
554.611	3770.51	14102.6	16001.5	22651.8	31456	86950	0	3.76039	47.6216		0	0	142.041	415.352	3779.76	10017.3	14149	0	0	36.5393
553.564	3763.45	14076.3	15971.7	22608.9	31395.6	86785.3	0	3.75683	47.5763		0	0	143.098	418.444	3807.96	10092.2	14254.7	0	0	36.7638
553.131	3760.61	14065.5	15958.5	22589	31366.7	86710.6	0	3.75785	47.5647		0	0	143.855	420.661	3828.17	10145.8	14330.5	0	0	36.9243
552.682	3757.34	14052.6	15943.2	22566.5	31334.4	86625.5	0	3.75655	47.5485		0	0	144.358	422.135	3841.62	10181.6	14380.9	0	0	37.0261
551.999	3752.56	14034.4	15922	22535.7	31290.6	86508.1	0	3.75403	47.5173		0	0	144.654	423.004	3849.56	10202.7	14410.7	0	0	37.0767
551.231	3747.2	14013.9	15898.2	22501.3	31242.2	86377.3	0	3.75112	47.4821		0	0	144.867	423.624	3855.2	10217.7	14431.8	0	0	37.1073
549.721	3736.77	13974.5	15853.3	22437.5	31153.3	86132.8	0	3.74488	47.4102		0	0	145.325	424.968	3867.48	10250.4	14478	0	0	37.1908
547.412	3721.15	13916.2	15787.3	22344.3	31024.2	85774.8	0	3.73579	47.3105		0	0	148.033	432.896	3939.79	10442.6	14749.2	0	0	37.7486
544.899	3704.31	13853.7	15716.8	22245	30887.1	85393	0	3.72701	47.2175		0	0	150.571	440.327	4007.58	10622.7	15003.4	0	0	38.2676
543.142	3692.55	13810.1	15667.7	22175.8	30791.3	85126.6	0	3.72095	47.152		0	0	152.938	447.258	4070.79	10790.7	15240.4	0	0	38.748
541.688	3682.75	13773.6	15626.4	22117.4	30710.3	84902.2	0	3.71447	47.0752		0	0	155.426	454.546	4137.3	10967.5	15489.9	0	0	39.2255
540.085	3671.87	13732.9	15580.1	22051.8	30619.1	84650.6	0	3.70568	46.9659		0	0	157.444	460.47	4191.53	11112.1	15693.7	0	0	39.5972
538.791	3662.92	13699.1	15541.3	21996.4	30541.2	84438.3	0	3.6955	46.8304		0	0	158.933	464.83	4231.4	11218.6	15843.7	0	0	39.8199
538.543	3661.03	13691.5	15532.1	21982.3	30520.2	84385.3	0	3.69051	46.755		0	0	158.521	463.618	4220.29	11189	15802	0	0	39.6539
537.928	3656.76	13675.2	15513	21954.4	30480.2	84278.9	0	3.68522	46.6788		0	0	157.609	460.996	4196.85	11127.5	15714.9	0	0	39.3931
536.682	3648.33	13643.7	15477.4	21904	30410.4	84085.5	0	3.67913	46.6065		0	0	156.426	457.518	4165.09	11043.5	15596.1	0	0	39.0342
535.389	3639.63	13611.4	15441	21852.8	30339.7	83888.6	0	3.67344	46.5425		0	0	154.842	452.873	4122.68	10930.7	15437	0	0	38.654
534.59	3634.36	13592.1	15419.7	21823.6	30300.1	83775.2	0	3.67179	46.533		0	0	153.748	449.667	4093.42	10853	15327.3	0	0	38.3893
536.356	3646.53	13638.1	15472.4	21899.1	30406.4	84064.3	0	3.68475	46.7044		0	0	154.042	450.523	4101.16	10873.4	15356.2	0	0	38.3897
538.113	3658.6	13683.6	15524.4	21973.2	30510.2	84348.4	0	3.69759	46.8723		0	0	155.425	454.572	4138.11	10971.6	15494.7	0	0	38.7283
539.757	3669.9	13726.1	15573.1	22042.5	30606.9	84613.7	0	3.70983	47.0317		0	0	156.76	458.491	4173.93	11066.9	15629.2	0	0	39.0814
539.281	3666.75	13713.9	15557.9	22018.4	30569.1	84522.3	0	3.71243	47.0342		0	0	158.213	462.752	4212.86	11170.5	15775.3	0	0	39.4302
538.541	3661.25	13692.1	15531.6	21979.4	30512.8	84375.2	0	3.70717	46.9655		0	0	159.468	466.431	4246.44	11259.8	15901.3	0	0	39.7098
538.244	3659.07	13683.6	15521.9	21965.6	30493.6	84322.7	0	3.70492	46.942		0	0	158.924	464.839	4231.97	11221.5	15847.1	0	0	39.6249
538.197	3659.11	13684.6	15523.7	21968.8	30498.4	84333.3	0	3.70607	46.952		0	0	158.42	463.367	4218.56	11185.8	15796.8	0	0	39.5369
538.705	3662.81	13699.7	15543.2	22000.3	30548.1	84451.3	0	3.70514	46.976		0	0	158.02	462.196	4207.89	11157.3	15756.7	0	0	39.4596
540.985	3677.82	13754.8	15604.7	22086.2	30666.3	84783.1	0	3.70752	46.9801		0	0	158.052	462.28	4208.45	11158.2	15758.2	0	0	39.4866
542.394	3687.11	13788.9	15642.6	22138.9	30738	84986.5	0	3.7099	46.9907		0	0	159.076	465.262	4235.49	11229.8	15859.4	0	0	39.7034
543.406	3693.94	13814.2	15670.9	22178.3	30791.7	85138.2	0	3.71284	47.0136		0	0	160.733	470.099	4279.45	11346.2	16023.9	0	0	40.0516
544.157	3699.27	13834.6	15694.5	22211.9	30838.7	85266.6	0	3.71584	47.0454		0	0	162.134	474.186	4316.58	11444.6	16162.8	0	0	40.3633
544.716	3703.36	13850.8	15713.8	22240.7	30880.3	85375.1	0	3.71799	47.0732		0	0	163.357	477.766	4349.21	11531.2	16285.1	0	0	40.6433
545.48	3708.74	13871.9	15739.1	22278.1	30934	85516.3	0	3.72006	47.1127		0	0	164.404	480.835	4377.23	11605.7	16390.2	0	0	40.8868
546.591	3716.15	13899.4	15770.6	22324.2	31000.3	85693	0	3.72177	47.1504		0	0	164.874	482.213	4389.8	11639.1	16437.4	0	0	40.9881
547.914	3725.12	13932.9	15808.7	22378.2	31075.4	85900.2	0	3.72835	47.231		0	0	165.333	483.557	4402.06	11671.7	16483.4	0	0	41.0867
548.54	3729.52	13949.2	15826.3	22401.3	31105.1	85990.4	0	3.73625	47.2993		0	0	165.813	484.965	4414.93	11705.9	16531.6	0	0	41.1944
548.68	3730.09	13950.4	15826.6	22400.4	31101.9	85988.4	0	3.73789	47.3184		0	0	166.693	487.543	4438.48	11768.6	16620	0	0	41.3874
549.176	3733.26	13961.7	15838.8	22416.9	31124.4	86053.2	0	3.74111	47.3586		0	0	167.996	491.362	4473.33	11861.3	16750.8	0	0	41.6482
550.721	3743.59	14000.1	15882.4	22478.8	31210.7	86291.1	0	3.74937	47.4632		0	0	168.731	493.517	4493.06	11913.9	16825	0	0	41.8281
551.197	3746.78	14012	15895.9	22498.1	31238	86365.3	0	3.7528	47.511		0	0	168.481	492.776	4486.12	11894.9	16798.4	0	0	41.8273
549.551	3735.66	13970.5	15848.8	22431.6	31145.9	86110	0	3.74638	47.4401		0	0	168.171	491.855	4477.56	11871.7	16765.9	0	0	41.7782
547.465	3721.71	13918.7	15790.6	22349.6	31032.6	85794.5	0	3.74002	47.3772		0	0	167.75	490.62	4466.27	11841.6	16723.5	0	0	41.6993
545.992	3712.01	13883.2	15750.9	22294	30956.1	85579.9	0	3.73873	47.3788		0	0	167.2	489.014	4451.67	11802.9	16668.8	0	0	41.5886
545.062	3705.98	13861.2	15726.5	22259.1	30906	85444	0	3.7405	47.4076		0	0	166.04	485.623	4420.78	11721	16553.1	0	0	41.358
542.849	3691.04	13805.4	15662.7	22168.1	30778.8	85095.6	0	3.7304	47.2686		0	0	163.711	478.805	4358.62	11555.7	16319.9	0	0	40.8946
540.184	3672.89	13736.9	15584	22055.6	30620.9	84664.9	0	3.71716	47.0931		0	0	161.151	471.314	4290.32	11374.3	16063.9	0	0	40.3708
537.049	3651.28	13655.2	15490.2	21921	30431.7	84150.1	0	3.69985	46.8742		0	0	158.718	464.208	4225.69	11203.1	15822	0	0	39.8552
534.707	3635.07	13593.8	15419.8	21820.6	30291.7	83766.4	0	3.68607	46.7058		0	0	156.008	456.283	4153.61	11012.2	15552.3	0	0	39.2683
535.266	3638.86	13608	15435.9	21843.4	30323.5	83854.1	0	3.68903	46.7433		0	0	153.119	447.83	4076.62	10808	15264	0	0	38.6526
535.785	3642.37	13621.1	15450.9	21864.7	30353.1	83935.6	0	3.6918	46.778		0	0	150.353	439.745	4002.96	10612.3	14987.7	0	0	38.0794
535.389	3639.67	13611	15439.4	21848.5	30330.8	83873.7	0	3.68956	46.7524		0	0	150.788	441.01	4014.49	10643.2	15031.3	0	0	38.133
534.389	3632.94	13586.1	15411.3	21808.9	30275.8	83720.9	0	3.68487	46.698		0	0	151.539	443.204	4034.44	10696.1	15105.9	0	0	38.2744
534.419	3633.18	13587	15412.4	21810.4	30277.9	83726.8	0	3.68581	46.7109		0	0	152.699	446.597	4065.33	10778	15221.6	0	0	38.5175
534.176	3631.54	13580.9	15405.5	21800.6	30264.3	83689.1	0	3.68484	46.6993		0	0	154.605	452.169	4116.06	10912.5	15411.6	0	0	38.9132
532.401	3619.49	13535.9	15354.3	21728.1	30163.2	83410.6	0	3.67559	46.5849		0	0	157.321	460.121	4188.53	11104.9	15683.2	0	0	39.5189
529.773	3601.68	13469.3	15278.7	21620.9	30014	82999.1	0	3.66214	46.419		0	0	159.585	466.75	4248.91	11264.8	15909.1	0	0	40.0333
529.394	3599.13	13459.8	15268	21605.8	29993.1	82941	0	3.66065	46.4013		0	0	161.15	471.309	4290.25	11374	16063.5	0	0	40.3741
528.164	3590.76	13428.4	15232.3	21555	29922.3	82746.3	0	3.65355	46.3124		0	0	162.467	475.153	4325.22	11466.8	16194.6	0	0	40.6611
526.824	3581.63	13394.2	15193.3	21499.5	29845.1	82533.7	0	3.64524	46.2078		0	0	164.153	480.085	4370.15	11586.1	16363	0	0	41.0055
525.512	3572.66	13360.5	15155	21445.3	29769.9	82325.9	0	3.63629	46.0938		0	0	166.114	485.826	4422.49	11725.2	16559.2	0	0	41.3893
529.218	3598.59	13460	15271.5	21615.6	30012.3	82972.4	0	3.65574	46.3702		0	0	167.839	490.876	4468.54	11847.5	16731.9	0	0	41.7242
532.935	3622.97	13549.1	15370.2	21752.3	30199.8	83502.9	0	3.66028	46.3799		0	0	169.032	494.365	4500.32	11931.9	16850.9	0	0	41.9654
536.966	3650.49	13652.1	15487	21917.3	30428.2	84136.2	0	3.67879	46.5854		0	0	170.148	497.63	4530.09	12011	16962.6	0	0	42.1788
538.657	3662.05	13695.6	15536.8	21988.3	30527.3	84407.9	0	3.68755	46.6946		0	0	171.301	501.009	4560.94	12093	17078.4	0	0	42.3859
539.679	3668.95	13721.4	15565.9	22029.6	30584.7	84566.3	0	3.69286	46.7604		0	0	169.498	495.733	4512.83	11965.2	16898	0	0	42.0434
540.896	3677.21	13752.3	15601.1	22079.5	30654.3	84757.9	0	3.69912	46.838		0	0	166.15	485.928	4423.4	11727.5	16562.6	0	0	41.4049
542.751	3689.81	13799.5	15654.7	22155.8	30760.6	85050.6	0	3.70857	46.9553		0	0	162.488	475.208	4325.64	11467.8	16196	0	0	40.683
543.889	3697.42	13827.7	15686.4	22200.5	30822.6	85222.7	0	3.71454	47.0294		0	0	158.993	464.988	4232.53	11220.6	15847	0	0	39.9523
543.516	3694.68	13817	15674.1	22182.8	30798	85155.5	0	3.7134	47.0205		0	0	154.987	453.267	4125.73	10937.1	15446.8	0	0	39.1038
541.813	3683.23	13774.5	15626.5	22116.4	30707.1	84899.7	0	3.70803	46.9727		0	0	150.706	440.749	4011.77	10634.9	15020	0	0	38.1856
541.087	3678.57	13757.8	15608.1	22091.3	30673.7	84802.5	0	3.70925	47.005		0	0	147.321	430.868	3921.99	10397.1	14684.1	0	0	37.4303
541.884	3684.18	13779.2	15632.9	22126.9	30723.9	84938.5	0	3.7178	47.1222		0	0	144.372	422.246	3843.61	10189.7	14391	0	0	36.7511
543.326	3694.12	13816.7	15675.8	22188.1	30809.2	85172.5	0	3.72915	47.2709		0	0	141.735	414.533	3773.39	10003.5	14128.1	0	0	36.1663
544.526	3702.42	13847.7	15710.4	22235.3	30871.9	85354.1	0	3.73961	47.3731		0	0	139.719	408.631	3719.5	9860.11	13925.8	0	0	35.7502
545.19	3706.44	13861.4	15724.3	22253	30894.1	85424.9	0	3.74206	47.3994		0	0	138.391	404.737	3683.88	9765.23	13792	0	0	35.4874
546.294	3713.73	13888.3	15754.7	22296.2	30954.4	85591.2	0	3.74695	47.4648		0	0	138.671	405.54	3691.02	9783.67	13818.3	0	0	35.5967
552.581	3756.76	14050.2	15939.6	22559.6	31322.3	86600.1	0	3.7792	47.861		0	0	140.015	409.463	3726.63	9877.73	13951.3	0	0	35.9358
570.965	3881.17	14515.5	16469.1	23313.1	32375.1	89491.5	0	3.85097	48.735		0	0	141.51	413.825	3766.21	9982.43	14099.3	0	0	36.2916
550.189	3740.29	13988	15868.5	22458.2	31180.6	86211.9	0	3.76765	47.7237		0	0	144.374	422.196	3842.36	10184.2	14384.2	0	0	36.933
546.086	3712.45	13883.9	15750.2	22290.4	30947	85567.9	0	3.74855	47.4907		0	0	147.1	430.17	3914.99	10376.8	14656.3	0	0	37.536
544.321	3700.49	13839.2	15699.4	22218.3	30846.5	85291.1	0	3.73975	47.3825		0	0	149.501	437.192	3978.93	10546.5	14895.8	0	0	38.0613
546.86	3717.85	13904.4	15773.7	22324	30994	85696.5	0	3.75035	47.5084		0	0	152.047	444.644	4046.9	10727.1	15150.7	0	0	38.5828
574.821	3907.02	14611.6	16577.9	23467.3	32589.8	90084.3	0	3.8574	48.7899		0	0	154.162	450.835	4103.37	10877.2	15362.5	0	0	39.0105
540.61	3675.83	13747.9	15596.7	22073.6	30646.2	84734	0	3.71942	47.1216		0	0	155.869	455.834	4148.98	10998.4	15533.5	0	0	39.3517
528.983	3596.34	13449.3	15256.1	21588.8	29969.4	82876	0	3.65827	46.3715		0	0	156.938	458.966	4177.57	11074.4	15640.8	0	0	39.5591
523.519	3559.15	13310	15097.6	21363.9	29656.5	82013.4	0	3.62572	45.963		0	0	157.737	461.308	4198.94	11131.2	15721	0	0	39.7127
519.341	3531.07	13205.5	14979.2	21196.1	29422.8	81368.4	0	3.60263	45.6583		0	0	158.386	463.212	4216.34	11177.6	15786.3	0	0	39.8222
516.257	3510.28	13128.1	14891.8	21072.7	29251.4	80893.7	0	3.58587	45.4483		0	0	159.054	465.197	4234.73	11227.1	15855.9	0	0	39.9241
513.187	3489.62	13051.3	14805.2	20950.5	29081.8	80423.4	0	3.56918	45.2404		0	0	159.408	466.221	4244.08	11252.3	15891.3	0	0	39.9253
513.082	3488.55	13046.3	14798.3	20939.4	29065.7	80383.8	0	3.56684	45.21		0	0	159.277	465.83	4240.45	11242.5	15877.6	0	0	39.8379
514.012	3494.49	13067.9	14822.5	20973.9	29114.3	80517	0	3.5705	45.2722		0	0	158.802	464.444	4227.86	11209.1	15830.4	0	0	39.6694
516.169	3509.22	13123.2	14885.5	21063.3	29238.7	80859.8	0	3.5838	45.4393		0	0	158.216	462.77	4213.12	11171.3	15776.4	0	0	39.4959
520.597	3539.27	13235.3	15012.5	21242.8	29487.8	81549.5	0	3.60813	45.7338		0	0	156.675	458.247	4171.75	11061.2	15621.1	0	0	39.0965
524.821	3568.23	13344.3	15136.7	21419.3	29733.3	82225.5	0	3.63306	46.0396		0	0	154.472	451.789	4112.79	10904.5	15399.9	0	0	38.574
529.286	3599.19	13462.2	15273.1	21615.7	30010	82974.7	0	3.65972	46.3813		0	0	152.584	446.256	4062.3	10770.3	15210.6	0	0	38.1076
533.741	3629.03	13573.2	15399.4	21796.3	30264.5	83668.8	0	3.67543	46.6019		0	0	150.819	441.108	4015.53	10646.4	15035.6	0	0	37.691
537.671	3655.41	13671.2	15509.9	21952.1	30480.1	84268.1	0	3.69116	46.7818		0	0	149.294	436.657	3975.11	10539.5	14884.4	0	0	37.3628
539.485	3667.53	13716.1	15560.4	22023	30577.6	84540.8	0	3.69743	46.8482		0	0	148.303	433.785	3949.21	10471.2	14787.8	0	0	37.1479
541.655	3682.12	13770.3	15621.5	22109.1	30696.5	84871.8	0	3.70636	46.9484		0	0	148.967	435.726	3967.01	10519.1	14855.2	0	0	37.2577
543.177	3692.38	13808.5	15664.7	22169.9	30780.6	85105.7	0	3.71293	47.0227		0	0	150.521	440.268	4008.37	10628.9	15010.2	0	0	37.5595
543.976	3697.79	13828.7	15687.4	22201.9	30824.8	85228.7	0	3.71618	47.0577		0	0	152.419	445.82	4058.93	10763.1	15199.6	0	0	37.933
544.052	3698.34	13830.7	15689.7	22204.9	30828.7	85240.2	0	3.71593	47.0502		0	0	154.916	453.129	4125.52	10939.3	15448.6	0	0	38.5062
547.752	3723.72	13926.3	15798.9	22360.5	31046.1	85836.4	0	3.73365	47.2658		0	0	157.666	461.144	4198.13	11131.2	15719.9	0	0	39.0796
551.739	3751.16	14029.9	15917.9	22531.2	31286	86489.2	0	3.75157	47.4875		0	0	160.513	469.459	4273.77	11331.7	16003.2	0	0	39.6676
553.91	3765.7	14084.5	15980.8	22622.4	31416.2	86838.5	0	3.75519	47.5545		0	0	161.979	473.748	4312.88	11435.7	16149.8	0	0	39.9895
552.787	3757.81	14054.4	15946	22572.4	31345.9	86647.7	0	3.74131	47.3681		0	0	163.151	477.187	4344.3	11519.3	16267.7	0	0	40.2664
552.103	3752.89	14035.4	15923.8	22540.1	31300.4	86525.3	0	3.72993	47.211		0	0	164.784	481.981	4388.16	11636.2	16432.6	0	0	40.7314
552.511	3755.37	14044	15933	22552.8	31317.6	86575	0	3.72363	47.1131		0	0	166.21	486.132	4425.64	11734.6	16572	0	0	41.1289
552.789	3757.1	14050.3	15940	22562.6	31331.4	86613.1	0	3.71793	47.0241		0	0	167.538	490.002	4460.75	11827.5	16703.3	0	0	41.4449
551.947	3751.58	14030.1	15917.8	22532.2	31290.6	86495.4	0	3.70782	46.887		0	0	168.705	493.429	4492.1	11911	16821	0	0	41.7344
551.181	3746.65	14012.6	15899	22507.2	31257.7	86397.4	0	3.70033	46.7912		0	0	169.002	494.311	4500.29	11933.1	16852.1	0	0	41.87
550.635	3743.24	14000.8	15886.7	22491.2	31237.2	86334	0	3.69474	46.7196		0	0	167.966	491.261	4472.21	11857.7	16746	0	0	41.7332
549.869	3737.94	13981.1	15865.2	22462.7	31200.1	86223.2	0	3.68453	46.6176		0	0	167.502	489.886	4459.49	11823.4	16697.9	0	0	41.6648
548.888	3731.2	13955.8	15836.4	22421.8	31143.7	86066.9	0	3.6747	46.4888		0	0	168.058	491.511	4474.24	11862.4	16753	0	0	41.7912
548.496	3728.5	13945.6	15824.8	22405.4	31120.7	86003.9	0	3.6709	46.4392		0	0	169.018	494.317	4499.81	11930.3	16848.8	0	0	41.9903
548.205	3726.51	13938.1	15816.3	22393.3	31103.8	85957.3	0	3.66811	46.4026		0	0	170.558	498.831	4541.02	12039.9	17003.4	0	0	42.2872
548.019	3725.22	13933.3	15810.8	22385.4	31092.8	85927.2	0	3.66631	46.3791		0	0	171.467	501.491	4565.3	12104.5	17094.6	0	0	42.4545
548.056	3725.49	13934.3	15812	22387.1	31095.1	85933.6	0	3.66706	46.3891		0	0	172.139	503.46	4583.28	12152.3	17162.1	0	0	42.5768
547.841	3724.07	13929.1	15806	22378.6	31083.3	85901.2	0	3.66828	46.4079		0	0	172.912	505.723	4603.93	12207.3	17239.6	0	0	42.7146
547.109	3719.16	13910.8	15785.3	22349.1	31042.1	85787.7	0	3.66758	46.4039		0	0	173.978	508.845	4632.43	12283.1	17346.5	0	0	42.9012
546.036	3711.94	13883.9	15754.8	22305.7	30981.4	85621.1	0	3.66565	46.3856		0	0	175.153	512.287	4663.86	12366.7	17464.5	0	0	43.1013
547.156	3719.62	13912.7	15787.6	22352.5	31045.9	85799.5	0	3.67567	46.5159		0	0	178.101	520.932	4742.89	12577.2	17761.2	0	0	43.568
547.752	3723.76	13928.2	15804.5	22374.6	31074.8	85886	0	3.68384	46.5957		0	0	180.84	528.963	4816.33	12772.9	18037.2	0	0	43.9692
547.869	3724.36	13929.5	15804.9	22373.9	31072.2	85885.1	0	3.68732	46.6349		0	0	180.525	528.038	4807.84	12750.2	18005.3	0	0	43.9333
549.517	3735.3	13969.9	15850.1	22437	31158.7	86128.3	0	3.6959	46.7404		0	0	179.918	526.264	4791.67	12707.2	17944.6	0	0	43.8478
551.811	3750.63	14026.5	15913.5	22526	31281.8	86471.9	0	3.70787	46.8885		0	0	179.369	524.664	4777.16	12668.9	17890.4	0	0	43.7643
553.96	3765.05	14080.1	15974	22611.4	31400	86800.1	0	3.71936	47.0331		0	0	179.957	526.392	4793.08	12711.8	17950.7	0	0	43.8132
555.458	3775.19	14118	16017	22672.1	31484.3	87033.3	0	3.72802	47.1446		0	0	179.404	524.772	4778.28	12672.5	17895.2	0	0	43.727
557.022	3785.83	14157.8	16062.3	22736.5	31573.9	87280.2	0	3.73753	47.2681		0	0	178.485	522.084	4753.78	12607.4	17803.3	0	0	43.6069
558.59	3796.55	14198.1	16108.3	22801.9	31665.1	87530.9	0	3.74765	47.4001		0	0	177.487	519.149	4726.75	12534.6	17701	0	0	43.4727
560.972	3812.85	14259.5	16178.4	22901.8	31804.6	87913.3	0	3.76225	47.5885		0	0	176.645	516.666	4703.9	12473.3	17614.8	0	0	43.3352
562.463	3823.14	14298.3	16222.9	22965.4	31893.6	88156.7	0	3.77429	47.7469		0	0	175.951	514.622	4685.1	12423	17544	0	0	43.2159
563.189	3828.25	14317.9	16245.5	22997.9	31939.3	88280.7	0	3.78424	47.8816		0	0	175.253	512.571	4666.33	12372.9	17473.4	0	0	43.0928
565.931	3846.99	14388.3	16326	23112.7	32100	88720.6	0	3.80055	48.0877		0	0	174.362	509.962	4642.53	12309.7	17384.2	0	0	42.9361
568.417	3863.93	14451.9	16398.6	23215.8	32242.9	89114.9	0	3.8156	48.2734		0	0	173.513	507.478	4619.88	12249.5	17299.2	0	0	42.7991
569.666	3872.37	14483	16433.1	23263.9	32309.2	89301.2	0	3.8231	48.3507		0	0	172.734	505.196	4599.04	12194	17221	0	0	42.659
571.037	3881.53	14517.1	16471.6	23318.3	32384.9	89510.7	0	3.82777	48.4058		0	0	171.24	500.823	4559.17	12088.1	17071.5	0	0	42.4024
572.596	3891.99	14555.9	16515.4	23380.1	32470.7	89748.6	0	3.83344	48.4731		0	0	170.28	498.014	4533.55	12020	16975.4	0	0	42.2294
574.124	3902.24	14594	16558.5	23441.1	32555.5	89983.1	0	3.83871	48.5353		0	0	169.915	496.944	4523.77	11994	16938.7	0	0	42.1608
574.217	3902.89	14596.6	16561.6	23445.8	32562.5	90000.9	0	3.83702	48.5122		0	0	169.922	496.961	4523.9	11994.2	16939.1	0	0	42.1549
574.381	3904.04	14601	16566.9	23453.8	32574.3	90031.2	0	3.83508	48.4851		0	0	169.927	496.973	4523.97	11994.3	16939.3	0	0	42.1443
574.648	3905.92	14608.5	16576	23467.4	32594.1	90082.2	0	3.83288	48.4565		0	0	169.611	496.048	4515.52	11971.9	16907.6	0	0	42.0837
573.779	3900.07	14586.7	16551.4	23432.9	32546.4	89949.5	0	3.82784	48.3943		0	0	171.726	502.297	4573.33	12127.9	17126.7	0	0	42.39
573.326	3897.02	14575.5	16538.9	23415.3	32522.2	89881.7	0	3.82565	48.3714		0	0	182.512	533.871	4861.41	12894	18207.5	0	0	43.9072
573.519	3898.33	14580.3	16544.3	23423	32532.8	89911.2	0	3.82638	48.3774		0	0	183.793	537.621	4895.64	12985.1	18336	0	0	44.0577
573.839	3900.46	14588.2	16553.1	23435.3	32549.8	89958.7	0	3.82786	48.3955		0	0	183.849	537.786	4897.14	12989	18341.6	0	0	44.0903
573.79	3900.14	14587	16551.7	23433.3	32547	89951.2	0	3.8278	48.3941		0	0	169.664	496.202	4516.92	11975.6	16912.8	0	0	42.09
573.343	3897.13	14575.8	16539.4	23416.2	32523.5	89884.8	0	3.82494	48.364		0	0	170.019	497.246	4526.49	12001.1	16948.8	0	0	42.1713
573.037	3894.97	14567.7	16530.2	23403.7	32507.5	89837.5	0	3.81915	48.2921		0	0	170.711	499.268	4544.9	12050	17017.8	0	0	42.2843
572.794	3893.26	14561.2	16522.8	23393.3	32493.1	89797.4	0	3.81381	48.2197		0	0	171.283	500.939	4560.13	12090.5	17074.9	0	0	42.3697
572.582	3891.77	14555.5	16516.3	23384.2	32480.4	89762.5	0	3.8093	48.1586		0	0	171.815	502.501	4574.36	12128.2	17128.2	0	0	42.4683
572.733	3892.79	14559.3	16520.7	23390.3	32488.8	89785.9	0	3.80966	48.162		0	0	172.118	503.406	4582.82	12151.1	17160.3	0	0	42.5306
573.221	3896.1	14571.7	16534.6	23409.8	32515.7	89860.9	0	3.81398	48.2154		0	0	171.8	502.465	4574.11	12127.6	17127.4	0	0	42.4682
573.682	3899.24	14583.4	16547.8	23428.4	32541.4	89932.5	0	3.81806	48.2685		0	0	169.932	496.98	4523.99	11994.4	16939.4	0	0	42.1112
573.413	3897.58	14577.5	16541.3	23419.1	32528	89896.1	0	3.82381	48.3515		0	0	167.959	491.208	4471.34	11854.4	16741.8	0	0	41.761
572.882	3894.08	14564.3	16525.9	23396.4	32495.2	89809.6	0	3.82775	48.3951		0	0	165.961	485.359	4417.97	11712.5	16541.6	0	0	41.3888
572.485	3891.32	14553.7	16513.4	23378	32468.6	89739.6	0	3.83004	48.4282		0	0	163.577	478.384	4354.42	11543.7	16303.3	0	0	40.9448
571.727	3886.14	14534.1	16490.8	23345.3	32422.3	89614.7	0	3.83069	48.441		0	0	161.303	471.729	4293.74	11382.5	16075.9	0	0	40.5037
570.431	3877.34	14501	16452.7	23290.6	32345.1	89405.2	0	3.82934	48.4299		0	0	161.582	472.569	4301.56	11403.3	16105.2	0	0	40.4577
568.692	3865.49	14456.4	16401.6	23217.3	32242	89124.6	0	3.82593	48.3934		0	0	183.612	537.144	4892.1	12978.2	18325	0	0	43.4916
568.427	3863.63	14449.2	16393.2	23205.1	32224.6	89078.2	0	3.82659	48.4043		0	0	168.898	494.01	4497.78	11927.4	16843.6	0	0	41.3321
569.089	3868.1	14465.9	16412.1	23231.8	32261.7	89180.9	0	3.82971	48.4431		0	0	154.189	450.903	4103.85	10878	15363.9	0	0	39.0854
569.012	3867.57	14463.9	16409.9	23228.7	32257.4	89168.9	0	3.82934	48.4385		0	0	154.468	451.724	4111.34	10898	15392	0	0	39.1419
568.3	3862.77	14446	16389.6	23199.9	32217.4	89058.4	0	3.82605	48.3977		0	0	154.99	453.253	4125.29	10935	15444.3	0	0	39.2461
567.787	3859.32	14433.2	16375.1	23179.4	32189	88979.6	0	3.82353	48.3664		0	0	155.802	455.629	4146.97	10992.6	15525.6	0	0	39.41
569.074	3868	14465.5	16411.7	23231.2	32260.9	89178.7	0	3.8296	48.4417		0	0	156.978	459.073	4178.37	11076.1	15643.4	0	0	39.6469
569.952	3873.93	14487.7	16436.8	23266.7	32310.2	89315	0	3.83419	48.4999		0	0	158.318	462.996	4214.14	11171.1	15777.5	0	0	39.9149
570.254	3875.98	14495.3	16445.5	23279	32327.1	89362	0	3.83625	48.527		0	0	159.261	465.756	4239.31	11237.9	15871.8	0	0	40.1039
570.111	3875.02	14491.7	16441.3	23273	32318.8	89339.2	0	3.83634	48.5297		0	0	159.794	467.316	4253.53	11275.7	15925.2	0	0	40.2103
570.478	3877.51	14501	16451.9	23288.1	32339.8	89397.1	0	3.83784	48.548		0	0	160.282	468.744	4266.55	11310.3	15974	0	0	40.3055
571.562	3884.85	14528.5	16483.2	23332.7	32402	89567.9	0	3.84173	48.5945		0	0	160.66	469.849	4276.61	11337	16011.7	0	0	40.3749
572.563	3891.63	14553.9	16512.2	23373.8	32459.5	89725.8	0	3.84534	48.6377		0	0	160.961	470.729	4284.64	11358.3	16041.8	0	0	40.4303
573.102	3895.29	14567.6	16527.7	23395.8	32490.2	89810.3	0	3.84737	48.6618		0	0	161.307	471.743	4293.89	11382.9	16076.5	0	0	40.4961
573.071	3895.09	14566.8	16526.8	23394.6	32488.4	89805.5	0	3.8478	48.6682		0	0	161.606	472.617	4301.86	11404.2	16106.4	0	0	40.5518
572.909	3894	14562.8	16522.2	23388	32479.1	89780.3	0	3.84812	48.6743		0	0	161.928	473.56	4310.47	11427	16138.7	0	0	40.6122
573.008	3894.7	14565.5	16525.3	23392.3	32485	89796.7	0	3.84989	48.6989		0	0	162.324	474.72	4321.05	11455.2	16178.4	0	0	40.6877
573.064	3895.12	14567.1	16527.2	23395	32488.7	89807	0	3.85178	48.7257		0	0	162.061	473.952	4314.06	11436.6	16152.2	0	0	40.6335
572.801	3893.39	14560.7	16520.1	23385	32474.7	89768.1	0	3.85261	48.7401		0	0	161.752	473.047	4305.81	11414.7	16121.3	0	0	40.5703
572.355	3890.44	14549.8	16507.8	23367.7	32450.7	89701.4	0	3.85281	48.7475		0	0	161.65	472.748	4303.08	11407.5	16111.1	0	0	40.5485
571.879	3887.29	14538.2	16494.8	23349.4	32425.4	89630.9	0	3.85293	48.7538		0	0	162.123	474.132	4315.7	11440.9	16158.3	0	0	40.6489
570.572	3878.54	14505.7	16458.1	23297.5	32353.4	89431.4	0	3.85029	48.729		0	0	162.919	476.462	4336.92	11497.3	16237.8	0	0	40.82
568.471	3864.41	14453.1	16398.5	23213.1	32236.1	89107.1	0	3.84477	48.6708		0	0	172.816	505.503	4602.67	12205.7	17236.5	0	0	42.3532
566.76	3852.86	14410	16349.6	23143.7	32138.9	88840.1	0	3.83893	48.6044		0	0	183.765	537.556	4895.28	12984.7	18335.2	0	0	43.9399
566.39	3850.36	14400.7	16339	23128.6	32117.5	88782	0	3.83781	48.5918		0	0	182.203	532.988	4853.63	12874	18178.9	0	0	43.7943
567.064	3854.86	14417.4	16357.8	23155.3	32155.4	88885.3	0	3.83859	48.5966		0	0	172.394	504.207	4590.19	12171.1	17188.3	0	0	42.3459
567.934	3860.66	14438.8	16382	23189.4	32202.8	89016.7	0	3.83917	48.5966		0	0	181.453	530.779	4833.29	12819.4	18102.1	0	0	43.7451
568.397	3863.71	14450.1	16394.6	23207.2	32227.4	89085.3	0	3.83859	48.5836		0	0	184.045	538.362	4902.44	13003.3	18361.6	0	0	44.0713
568.556	3864.7	14453.6	16398.5	23212.5	32234.6	89105.9	0	3.83668	48.5542		0	0	183.032	535.392	4875.31	12931.1	18259.7	0	0	43.9332
569.23	3869.21	14470.3	16417.4	23239.3	32272	89209.1	0	3.83729	48.5564		0	0	182.811	534.74	4869.31	12914.9	18237.1	0	0	43.9385
570.207	3875.79	14494.9	16445.2	23278.9	32327.2	89361	0	3.8393	48.5763		0	0	177.214	518.341	4719.42	12515.5	17674	0	0	43.1931
571.923	3887.39	14538.3	16494.6	23349.2	32425.4	89630.7	0	3.84444	48.6349		0	0	170.704	499.256	4544.89	12050.2	17018	0	0	42.3128
574.18	3902.61	14595.1	16559	23440.6	32552.7	89981.6	0	3.85101	48.7065		0	0	171.432	501.389	4564.34	12101.9	17090.9	0	0	42.4326
576.274	3916.74	14647.8	16619.1	23526	32672	90309.5	0	3.8561	48.7593		0	0	172.168	503.548	4584.1	12154.6	17165.2	0	0	42.5465
577.254	3923.35	14672.6	16647.3	23566.4	32728.8	90464.5	0	3.8568	48.7606		0	0	172.34	504.085	4589.39	12169.5	17185.8	0	0	42.5569
577.841	3927.42	14688	16665.2	23592.1	32765.3	90562.9	0	3.85607	48.7454		0	0	170.82	499.628	4548.74	12061.8	17033.7	0	0	42.1831
578.159	3929.8	14697.6	16676.9	23609.8	32791.3	90629.4	0	3.85429	48.7176		0	0	169.177	494.804	4504.58	11944	16867.7	0	0	41.7777
578.248	3930.34	14699.8	16680	23615.5	32801.1	90650.4	0	3.84982	48.6739		0	0	166.792	487.819	4440.85	11774.6	16628.7	0	0	41.2683
578.098	3929.22	14695.5	16675.1	23608.7	32792	90624.5	0	3.84259	48.5754		0	0	163.802	479.09	4361.49	11564.3	16331.6	0	0	40.6544
577.611	3925.82	14682.6	16660.4	23588.1	32763.6	90545.6	0	3.83339	48.452		0	0	161.162	471.384	4291.62	11379.9	16070.8	0	0	40.0619
577.023	3921.77	14667.4	16643.1	23563.6	32729.7	90451.7	0	3.82704	48.3685		0	0	159.287	465.887	4241.35	11246	15882	0	0	39.5882
576.506	3918.24	14654.2	16628.1	23542.3	32700.1	90369.9	0	3.82273	48.3128		0	0	158.867	464.66	4230.21	11216.5	15840.2	0	0	39.53
576.143	3915.76	14644.9	16617.5	23527.4	32679.5	90312.8	0	3.82014	48.2796		0	0	159.244	465.772	4240.42	11243.8	15878.7	0	0	39.6581
575.782	3913.29	14635.7	16607.1	23512.6	32659	90256	0	3.81699	48.2386		0	0	160.524	469.521	4274.66	11334.9	16007.2	0	0	39.964
575.628	3912.21	14631.6	16602.4	23506.1	32650.2	90231.3	0	3.81358	48.1926		0	0	162.504	475.308	4327.15	11473.4	16203.1	0	0	40.3898
575.705	3912.69	14633.3	16604.4	23509.1	32654.5	90242.6	0	3.81042	48.1487		0	0	164.206	480.258	4371.99	11591.8	16370.6	0	0	40.7486
575.163	3908.92	14619.2	16588.4	23486.7	32623.9	90156.8	0	3.80048	48.0156		0	0	165.315	483.494	4401.41	11669.8	16480.8	0	0	41.0047
574.208	3902.35	14594.5	16560.6	23447.6	32570.1	90006.6	0	3.78761	47.8452		0	0	166.479	486.903	4432.5	11752.4	16597.3	0	0	41.2423
573.055	3894.43	14564.9	16527.1	23400.6	32505.5	89826.2	0	3.77274	47.6488		0	0	167.568	490.092	4461.59	11829.7	16706.4	0	0	41.4629
571.966	3886.98	14537	16495.7	23356.4	32444.8	89656.5	0	3.75993	47.4804		0	0	168.486	492.781	4486.12	11894.9	16798.4	0	0	41.6469
570.569	3877.45	14501.4	16455.4	23299.8	32366.6	89439	0	3.74592	47.2979		0	0	168.608	493.133	4489.3	11903.3	16810.3	0	0	41.6386
568.801	3865.41	14456.5	16404.5	23228	32266.9	89162.8	0	3.73026	47.0956		0	0	168.66	493.29	4490.75	11907.2	16815.8	0	0	41.6193
566.405	3849.09	14395.5	16335.5	23130.6	32132.4	88789	0	3.70806	46.8085		0	0	168.468	492.738	4485.84	11894.4	16797.6	0	0	41.5661
563.49	3829.34	14321.9	16252.4	23013.5	31970.6	88339	0	3.68361	46.4944		0	0	167.771	490.71	4467.48	11845.9	16729	0	0	41.4242
560.097	3806.28	14235.8	16155.1	22876.6	31781.7	87812.9	0	3.65613	46.1497		0	0	167.24	489.176	4453.8	11810.6	16678.7	0	0	41.2928
558.254	3793.72	14188.7	16101.7	22800.9	31676.7	87522.7	0	3.64188	45.9674		0	0	166.676	487.518	4438.64	11770.3	16621.9	0	0	41.1148
556.745	3783.44	14150.3	16058	22739.1	31590.9	87285.4	0	3.63046	45.8214		0	0	165.735	484.759	4413.46	11703.4	16527.4	0	0	40.8671
555.295	3773.58	14113.4	16016.1	22679.8	31508.5	87057.7	0	3.62077	45.6985		0	0	164.542	481.264	4381.54	11618.4	16407.5	0	0	40.5734
553.777	3763.26	14074.8	15972.3	22617.9	31422.7	86820.3	0	3.60987	45.5596		0	0	163.364	477.807	4349.92	11534.1	16288.8	0	0	40.2832
552.308	3753.28	14037.5	15930.1	22558.3	31340	86591.3	0	3.59887	45.419		0	0	163.055	476.902	4341.63	11512	16257.6	0	0	40.1611
550.914	3743.8	14002.1	15890	22501.7	31261.7	86373.9	0	3.58804	45.2802		0	0	162.769	476.091	4334.54	11493.8	16231.6	0	0	40.0681
550.069	3738.1	13980.9	15866.1	22468.1	31215.2	86244.5	0	3.58303	45.2202		0	0	162.406	475.045	4325.32	11470.5	16198.1	0	0	39.9313
549.683	3735.46	13971	15854.9	22452.4	31193.7	86184.3	0	3.58082	45.1948		0	0	161.95	473.705	4313.05	11437.8	16152	0	0	39.7561
549.338	3733.11	13962.2	15844.9	22438.2	31174.1	86130	0	3.5783	45.1624		0	0	161.905	473.569	4311.78	11434.4	16147.3	0	0	39.6785
548.257	3725.74	13934.6	15813.5	22393.7	31112.3	85959.4	0	3.57074	45.0657		0	0	162.553	475.464	4329.06	11480.3	16212	0	0	39.7869
546.854	3716.17	13898.7	15772.9	22336.2	31032.5	85738.6	0	3.56013	44.9293		0	0	162.754	476.054	4334.44	11494.6	16232.2	0	0	39.8279
544.726	3701.66	13844.4	15711.2	22249	30911.4	85403.8	0	3.5443	44.7261		0	0	163.035	476.875	4341.93	11514.5	16260.3	0	0	39.8843
543.175	3691.11	13804.9	15666.3	22185.3	30822.8	85159.4	0	3.53487	44.6061		0	0	163.365	477.844	4350.77	11538	16293.5	0	0	39.9507
542.181	3684.35	13779.6	15637.5	22144.3	30765.6	85002.2	0	3.53002	44.5453		0	0	163.586	478.492	4356.68	11553.7	16315.7	0	0	40
541.988	3683.05	13774.7	15631.8	22136.1	30753.7	84970.6	0	3.53155	44.5666		0	0	163.812	479.151	4362.7	11569.7	16338.2	0	0	40.0457
543.292	3691.96	13808	15669.5	22189	30826.7	85174	0	3.54538	44.7468		0	0	163.911	479.442	4365.36	11576.8	16348.2	0	0	40.0657
545.232	3705.21	13857.6	15725.6	22268.1	30936.1	85477.8	0	3.5646	44.9972		0	0	163.569	478.441	4356.23	11552.5	16314	0	0	40.0053
547.145	3718.29	13906.5	15781.1	22346.3	31044.3	85778.1	0	3.58367	45.246		0	0	163.216	477.408	4346.8	11527.5	16278.6	0	0	39.9487
548.897	3730.26	13951.4	15831.9	22418.2	31143.7	86053.9	0	3.60025	45.462		0	0	163.197	477.355	4346.34	11526.3	16276.9	0	0	39.9914
550.578	3741.77	13994.5	15880.8	22487.2	31239.3	86318.8	0	3.61662	45.6757		0	0	163.675	478.762	4359.21	11560.6	16325.2	0	0	40.1652
552.185	3752.76	14035.7	15927.6	22553.3	31330.9	86572.4	0	3.63128	45.8664		0	0	164.756	481.925	4387.87	11635.8	16431.8	0	0	40.44
552.882	3757.51	14053.5	15947.8	22582	31370.9	86682.6	0	3.63596	45.9263		0	0	166.237	486.223	4426.73	11738.3	16576.9	0	0	40.7426
552.895	3757.6	14053.8	15948.2	22582.6	31371.7	86684.6	0	3.6356	45.9213		0	0	167.586	490.171	4462.77	11834.2	16712.2	0	0	41.0999
552.188	3752.76	14035.7	15927.6	22553.5	31331.4	86573.2	0	3.62901	45.8355		0	0	168.885	493.978	4497.51	11926.7	16842.6	0	0	41.4678
550.985	3744.51	14004.8	15892.6	22504.1	31263.3	86383.7	0	3.6151	45.6528		0	0	170.283	498.08	4535	12026.4	16983.3	0	0	41.855
549.509	3734.39	13966.9	15849.7	22443.7	31179.9	86151.7	0	3.59863	45.4368		0	0	172.193	503.641	4585.28	12158.6	17170.5	0	0	42.2612
547.628	3721.53	13918.7	15795.1	22366.8	31073.4	85856.3	0	3.58004	45.1945		0	0	173.7	508.044	4625.36	12265.1	17320.7	0	0	42.568
544.644	3701.15	13842.5	15708.7	22244.8	30904.8	85388.3	0	3.552	44.83		0	0	174.781	511.216	4654.37	12342.3	17429.7	0	0	42.7939
541.291	3678.26	13756.8	15611.8	22108.3	30716.1	84863.8	0	3.51989	44.4131		0	0	175.834	514.3	4682.54	12417.4	17535.6	0	0	43.0028
537.459	3652.14	13659.2	15501.3	21952.4	30500.7	84265.3	0	3.48486	43.9599		0	0	176.778	517.066	4707.78	12484.6	17630.3	0	0	43.1789
533.707	3626.6	13563.7	15393.1	21799.7	30288.9	83678.7	0	3.45503	43.5764		0	0	177.497	519.172	4727.01	12535.7	17702.4	0	0	43.3066
530.373	3603.92	13479	15297.2	21664.2	30101.1	83158.2	0	3.42799	43.2292		0	0	177.042	517.837	4714.82	12503.3	17656.7	0	0	43.2262
529.234	3596.17	13450	15264.4	21618	30037.2	82980.7	0	3.41833	43.1049		0	0	176.453	516.113	4699.08	12461.4	17597.6	0	0	43.1195
533.232	3623.37	13551.6	15379.5	21780.4	30262.1	83604.5	0	3.45132	43.5288		0	0	175.674	513.831	4678.26	12406.1	17519.5	0	0	42.9769
539.507	3666.09	13711.3	15560.4	22035.8	30616.2	84585.7	0	3.50176	44.1776		0	0	174.329	509.891	4642.28	12310.2	17384.3	0	0	42.7248
546.969	3716.97	13901.7	15776.1	22340.6	31038.2	85755.6	0	3.5643	44.9851		0	0	172.759	505.292	4600.26	12198.3	17226.6	0	0	42.4245
555.024	3772.02	14107.9	16009.9	22670.7	31495.1	87022.4	0	3.63878	45.952		0	0	171.041	500.257	4554.31	12076.1	17054.2	0	0	42.1058
561.849	3818.41	14280.7	16204.4	22942.9	31868.5	88069.3	0	3.70522	46.7963		0	0	170.127	497.582	4529.9	12011.2	16962.6	0	0	41.9394
566.278	3848.43	14392.4	16330.2	23119.3	32111	88747.8	0	3.74971	47.3746		0	0	169.735	496.435	4519.44	11983.4	16923.4	0	0	41.8659
568.841	3866.05	14458.6	16405.5	23225.9	32258.8	89156.4	0	3.77733	47.7404		0	0	169.847	496.763	4522.42	11991.4	16934.6	0	0	41.885
570.447	3877.29	14501.3	16454.4	23295.6	32355.9	89422.8	0	3.80167	48.0679		0	0	170.144	497.633	4530.38	12012.6	16964.5	0	0	41.9598
571.675	3885.89	14533.9	16491.8	23348.5	32428.9	89624.8	0	3.82258	48.3475		0	0	170.524	498.749	4540.6	12039.8	17002.8	0	0	42.0531
572.66	3892.41	14557.4	16517.1	23382.5	32474	89757.8	0	3.83388	48.4787		0	0	170.954	500.015	4552.21	12070.8	17046.5	0	0	42.1608
573.165	3895.7	14569.3	16530	23399.9	32496.9	89825.3	0	3.84074	48.5683		0	0	171.308	501.055	4561.75	12096.4	17082.5	0	0	42.2707
573.804	3900.02	14585.3	16547.9	23424.8	32530.8	89921.2	0	3.84714	48.6527		0	0	171.773	502.42	4574.23	12129.6	17129.4	0	0	42.3893
574.133	3902.29	14593.8	16557.5	23438.1	32549	89972.5	0	3.85223	48.7221		0	0	172.405	504.27	4591.1	12174.5	17192.7	0	0	42.5153
573.501	3898.09	14578.2	16539.9	23413.1	32513.9	89876.1	0	3.85353	48.7467		0	0	173.022	506.078	4607.61	12218.4	17254.6	0	0	42.636
572.428	3890.93	14551.7	16509.9	23370.6	32454.8	89712.7	0	3.85297	48.7489		0	0	173.581	507.714	4622.55	12258.1	17310.7	0	0	42.7525
571.527	3884.92	14529.4	16484.8	23335.3	32405.8	89576.7	0	3.85225	48.7474		0	0	173.965	508.843	4632.86	12285.5	17349.3	0	0	42.84
570.583	3878.61	14506	16458.3	23297.8	32353.9	89432.8	0	3.85071	48.7347		0	0	174.019	509	4634.28	12289.3	17354.7	0	0	42.834
570.09	3875.31	14493.7	16444.5	23278.3	32326.7	89357.5	0	3.84982	48.7267		0	0	173.992	508.917	4633.5	12287.2	17351.7	0	0	42.8106
570.178	3875.9	14495.9	16447	23281.8	32331.6	89371	0	3.84998	48.7282		0	0	173.888	508.609	4630.68	12279.6	17341.1	0	0	42.7702
570.633	3878.94	14507.2	16459.7	23299.8	32356.6	89440.4	0	3.8508	48.7355		0	0	173.339	507.002	4616.01	12240.7	17286.1	0	0	42.668
571.145	3882.37	14519.9	16474.1	23320.1	32384.7	89518.2	0	3.85153	48.741		0	0	172.647	504.98	4597.59	12191.7	17217	0	0	42.5611
571.16	3882.44	14520.1	16474.2	23320.1	32384.6	89518.6	0	3.85098	48.7328		0	0	171.804	502.511	4575.07	12131.9	17132.6	0	0	42.4126
571.138	3882.27	14519.4	16473.4	23318.9	32382.8	89514	0	3.85051	48.7263		0	0	170.286	498.068	4534.56	12024.3	16980.7	0	0	42.1279
570.707	3879.36	14508.6	16461.1	23301.4	32358.5	89447	0	3.84937	48.7142		0	0	167.683	490.452	4465.15	11839.8	16720.3	0	0	41.6499
569.288	3869.83	14473.1	16420.9	23244.5	32279.3	89228.1	0	3.84589	48.6783		0	0	164.669	481.616	4384.33	11624.2	16416.5	0	0	41.0779
568.325	3863.38	14449.2	16393.9	23206.4	32226.5	89081.6	0	3.84379	48.6588		0	0	161.611	472.656	4302.5	11406.5	16109.4	0	0	40.4745
568.092	3861.82	14443.4	16387.3	23197.2	32213.6	89046	0	3.84332	48.6542		0	0	158.848	464.563	4228.66	11210.3	15832.5	0	0	39.9158
568.039	3861.44	14441.9	16385.6	23194.6	32210	89036.4	0	3.8425	48.6429		0	0	156.473	457.61	4165.26	11041.9	15594.8	0	0	39.4318
567.84	3860.09	14436.8	16379.8	23186.4	32198.6	89004.9	0	3.84164	48.6325		0	0	154.328	451.329	4107.97	10889.6	15379.9	0	0	39.0023
568.187	3862.5	14446	16390.3	23201.4	32219.1	89061.9	0	3.84484	48.6742		0	0	153.805	449.798	4093.97	10852.3	15327.4	0	0	38.91
567.625	3858.8	14432.3	16374.6	23178.5	32186.5	88974.3	0	3.84528	48.667		0	0	153.951	450.226	4097.87	10862.6	15341.9	0	0	38.9458
564.571	3837.86	14353.2	16283.8	23048.3	32003.5	88476.2	0	3.83236	48.5096		0	0	154.071	450.576	4101.05	10871.1	15353.9	0	0	38.9765
561.685	3818.21	14279.5	16199.9	22929	31837	88018.6	0	3.82042	48.3667		0	0	153.946	450.207	4097.66	10862	15341.1	0	0	38.9626
561.544	3817.26	14276	16195.9	22923.3	31829	87996.5	0	3.81983	48.3596		0	0	153.779	449.716	4093.17	10850.1	15324.2	0	0	38.9324
561.488	3816.9	14274.6	16194.3	22921.1	31825.9	87988.2	0	3.81961	48.3568		0	0	153.671	449.399	4090.26	10842.4	15313.4	0	0	38.9121
561.327	3815.84	14270.7	16189.8	22914.6	31816.9	87963.4	0	3.81894	48.3485		0	0	153.526	448.973	4086.35	10831.8	15298.6	0	0	38.8904
561.241	3815.27	14268.6	16187.5	22911.3	31812.3	87950.7	0	3.81856	48.3438		0	0	154.046	450.491	4100.15	10868.4	15350.2	0	0	39.0093
561.345	3815.99	14271.3	16190.6	22915.7	31818.5	87967.6	0	3.81901	48.349		0	0	154.744	452.533	4118.73	10917.6	15419.7	0	0	39.1637
563.281	3829.18	14320.9	16247.2	22996.4	31931.2	88276.6	0	3.82717	48.447		0	0	155.193	453.846	4130.7	10949.4	15464.6	0	0	39.2625
566.706	3852.51	14408.4	16347.1	23138.9	32130.6	88822.8	0	3.84089	48.6109		0	0	155.465	454.641	4137.94	10968.6	15491.7	0	0	39.3214
569.283	3869.91	14473.7	16421.9	23246.3	32282.4	89234.6	0	3.84814	48.7106		0	0	155.795	455.609	4146.77	10992.1	15524.8	0	0	39.3889
570.739	3879.65	14509.9	16462.7	23304.1	32362.5	89456.6	0	3.851	48.7373		0	0	155.92	455.974	4150.1	11000.9	15537.3	0	0	39.4136
571.444	3884.37	14527.4	16482.6	23332.2	32401.6	89564.7	0	3.85214	48.7469		0	0	155.694	455.313	4144.08	10984.9	15514.8	0	0	39.3615
571.558	3885.13	14530.2	16485.7	23336.5	32407.6	89581.5	0	3.85146	48.7364		0	0	155.203	453.876	4130.99	10950.2	15465.7	0	0	39.2551
570.726	3879.49	14509.1	16461.7	23302.5	32360.3	89451	0	3.84766	48.6909		0	0	154.578	452.048	4114.33	10906	15403.3	0	0	39.1222
550.5	3742.1	13995.3	15878.6	22476.7	31212.8	86281	0	3.71907	47.0651		0	0	154.235	451.045	4105.19	10881.8	15369.1	0	0	39.0497
											0	0	154.981	453.227	4125.09	10934.6	15443.7	0	0	39.2014
											0	0	156.373	457.3	4162.22	11033.2	15582.9	0	0	39.4875
											0	0	157.595	460.879	4194.83	11119.8	15705.1	0	0	39.7436
											0	0	158.699	464.107	4224.26	11198	15815.4	0	0	39.9721
											0	0	160.565	469.57	4274.09	11330.4	16002.3	0	0	40.3383
											0	0	162.382	474.89	4322.62	11459.3	16184.3	0	0	40.6975
											0	0	164.102	479.927	4368.55	11581.4	16356.5	0	0	41.0373
											0	0	164.841	482.088	4388.26	11633.8	16430.5	0	0	41.181
											0	0	165.059	482.728	4394.1	11649.3	16452.3	0	0	41.2233
											0	0	165.442	483.85	4404.33	11676.5	16490.7	0	0	41.2984
											0	0	166.027	485.56	4419.92	11717.9	16549.1	0	0	41.416
											0	0	166.468	486.851	4431.69	11749.2	16593.3	0	0	41.5096
											0	0	166.99	488.382	4445.67	11786.3	16645.7	0	0	41.6174
											0	0	167.581	490.112	4461.47	11828.4	16705	0	0	41.7343
											0	0	167.522	489.938	4459.89	11824.2	16699.1	0	0	41.725
											0	0	167.704	490.473	4464.76	11837.2	16717.4	0	0	41.7595
											0	0	168.153	491.788	4476.77	11869.1	16762.4	0	0	41.8441
											0	0	171.761	502.386	4573.93	12128.9	17128.3	0	0	42.4044
											0	0	177.966	520.544	4739.54	12569	17749.4	0	0	43.2795
											0	0	176.95	517.566	4712.34	12496.6	17647.3	0	0	43.1363
											0	0	170.261	497.959	4533.06	12018.7	16973.6	0	0	42.2109
											0	0	175.961	514.671	4685.92	12426.4	17548.2	0	0	43.0003
											0	0	184.046	538.362	4902.39	13002.9	18361.2	0	0	44.1452
											0	0	176.168	515.268	4691.3	12440.6	17568.3	0	0	43.0408
											0	0	171.661	502.042	4570.15	12117	17112.4	0	0	42.4366
											0	0	178.166	521.122	4744.75	12582.8	17768.9	0	0	43.3769
											0	0	179.222	524.215	4773	12658	17875	0	0	43.5486
											0	0	174.933	511.686	4658.94	12355.3	17447.6	0	0	43.0043
											0	0	173.731	508.113	4625.62	12264.6	17320.6	0	0	42.822
											0	0	174.455	510.289	4646.04	12320.2	17398.5	0	0	42.9573
											0	0	175.002	511.879	4660.6	12359.5	17453.7	0	0	42.9586
											0	0	175.435	513.127	4671.82	12389	17495.4	0	0	42.9463
											0	0	176.417	516	4697.99	12458.4	17593.4	0	0	43.0889
											0	0	177.46	519.052	4725.84	12532.5	17697.9	0	0	43.2508
											0	0	178.487	522.062	4753.32	12605.6	17801.1	0	0	43.4147
											0	0	178.427	521.887	4751.73	12601.4	17795.1	0	0	43.426
											0	0	178.049	520.785	4741.71	12574.8	17757.6	0	0	43.3999
											0	0	177.995	520.633	4740.38	12571.4	17752.7	0	0	43.4297
											0	0	178.22	521.299	4746.53	12587.9	17775.9	0	0	43.507
											0	0	177.836	520.187	4736.44	12560.8	17737.8	0	0	43.5252
											0	0	177.383	518.823	4723.54	12525.5	17688.4	0	0	43.4577
											0	0	177.013	517.73	4713.5	12498.6	17650.6	0	0	43.3945
											0	0	180.338	527.511	4803.24	12738.5	17988.4	0	0	43.9005
											0	0	180.183	527.053	4799.13	12728	17973.5	0	0	43.848
											0	0	176.224	515.426	4692.52	12443	17572	0	0	43.265
											0	0	175.144	512.261	4663.6	12365.9	17463.4	0	0	43.087
											0	0	174.912	511.584	4657.47	12349.7	17440.5	0	0	43.0362
											0	0	174.605	510.699	4649.53	12329	17411.1	0	0	42.9734
											0	0	174.447	510.252	4645.73	12319.6	17397.5	0	0	42.9266
											0	0	174.964	511.761	4659.44	12356.1	17449	0	0	42.9695
											0	0	176.663	516.742	4704.94	12477.2	17619.8	0	0	43.2986
											0	0	178.152	521.096	4744.53	12581.9	17767.7	0	0	43.5719
											0	0	178.741	522.804	4759.94	12622.5	17825.2	0	0	43.6698
											0	0	179.204	524.161	4772.34	12655.5	17871.8	0	0	43.7397
											0	0	180.917	529.192	4818.44	12778.6	18045.2	0	0	43.9798
											0	0	180.797	528.854	4815.49	12771.1	18034.5	0	0	43.9621
											0	0	177.058	517.869	4714.79	12502.1	17655.5	0	0	43.4038
											0	0	176.158	515.225	4690.58	12437.5	17564.5	0	0	43.2505
											0	0	175.641	513.71	4676.74	12400.7	17512.5	0	0	43.1613
											0	0	174.695	510.934	4651.36	12333.1	17417.2	0	0	42.9937
											0	0	173.347	506.982	4615.27	12237	17281.7	0	0	42.7497
											0	0	171.787	502.418	4573.65	12126.5	17125.7	0	0	42.4761
											0	0	170.602	498.94	4541.83	12041.7	17006.2	0	0	42.236
											0	0	181.674	531.425	4839.18	12835.1	18124.3	0	0	43.7737
											0	0	178.812	523.067	4763.17	12633.6	17839.7	0	0	43.2667
											0	0	162.807	476.133	4333.93	11489.3	16226.6	0	0	40.7931
											0	0	159.568	466.65	4247.44	11259.5	15902.3	0	0	40.1761
											0	0	157.484	460.551	4191.82	11111.7	15693.7	0	0	39.757
											0	0	155.955	456.075	4151.01	11003.3	15540.7	0	0	39.4457
											0	0	154.492	451.793	4111.97	10899.6	15394.4	0	0	39.1459
											0	0	153.769	449.677	4092.68	10848.4	15322	0	0	38.9975
											0	0	153.182	447.96	4077.03	10806.8	15263.4	0	0	38.8766
											0	0	152.652	446.408	4062.88	10769.2	15210.3	0	0	38.7652
											0	0	151.396	442.733	4029.39	10680.3	15084.8	0	0	38.5027
											0	0	149.942	438.477	3990.59	10577.3	14939.4	0	0	38.1974
											0	0	148.278	433.609	3946.23	10459.4	14773.1	0	0	37.8457
											0	0	146.355	427.982	3894.92	10323.2	14580.7	0	0	37.4334
											0	0	144.157	421.549	3836.28	10167.4	14360.9	0	0	36.9592
											0	0	141.686	414.319	3770.41	9992.61	14114.1	0	0	36.423
											0	0	139.38	407.573	3708.98	9829.67	13884	0	0	35.9148
											0	0	138.049	403.681	3673.55	9735.67	13751.3	0	0	35.6102
											0	0	136.53	399.238	3633.09	9628.41	13599.8	0	0	35.2704
											0	0	134.79	394.149	3586.73	9505.41	13426.1	0	0	34.8907
											0	0	136.547	399.297	3633.74	9630.5	13602.6	0	0	35.2498
											0	0	138.262	404.316	3679.52	9752.15	13774.2	0	0	35.6089
											0	0	139.431	407.735	3710.64	9834.66	13890.8	0	0	35.8654
											0	0	140.554	411.023	3740.61	9914.25	14003.1	0	0	36.1033
											0	0	142.353	416.295	3788.78	10042.5	14184	0	0	36.4572
											0	0	144.026	421.195	3833.5	10161.5	14351.8	0	0	36.7946
											0	0	145.431	425.306	3870.98	10261	14492.3	0	0	37.0892
											0	0	146.631	428.819	3903	10346	14612.3	0	0	37.3394
											0	0	147.647	431.797	3930.21	10418.4	14714.4	0	0	37.5383
											0	0	148.511	434.337	3953.49	10480.5	14802	0	0	37.7013
											0	0	149.439	437.071	3978.63	10547.7	14896.6	0	0	37.8806
											0	0	150.373	439.793	4003.38	10613.5	14989.5	0	0	38.0161
											0	0	151.23	442.295	4026.08	10673.5	15074.3	0	0	38.1408
											0	0	151.244	442.336	4026.41	10674.3	15075.4	0	0	38.1018
											0	0	150.717	440.812	4012.71	10638.4	15024.5	0	0	37.9554
											0	0	149.738	437.954	3986.88	10570.6	14928.5	0	0	37.6841
											0	0	147.867	432.469	3936.82	10437.6	14740.7	0	0	37.2085
											0	0	144.929	423.872	3858.49	10229.7	14447.3	0	0	36.5379
											0	0	142.933	418.035	3805.3	10088.4	14247.8	0	0	36.0537
											0	0	142.108	415.622	3783.32	10030	14165.4	0	0	35.8768
											0	0	141.81	414.756	3775.54	10009.7	14136.6	0	0	35.8872
											0	0	142.208	415.928	3786.3	10038.6	14177.2	0	0	36.0453
											0	0	143.128	418.626	3810.93	10103.8	14269.4	0	0	36.2959
											0	0	142.728	417.437	3799.8	10073.5	14226.9	0	0	36.2422
											0	0	142.278	416.118	3787.75	10041.5	14181.7	0	0	36.1524
											0	0	142.073	415.527	3782.47	10027.7	14162.1	0	0	36.093
											0	0	141.953	415.191	3779.66	10020.9	14152.3	0	0	36.0396
											0	0	141.783	414.692	3775.11	10008.9	14135.3	0	0	35.999
											0	0	142.082	415.56	3782.94	10029.7	14164.6	0	0	36.0121
											0	0	142.943	418.065	3805.64	10089.5	14249.3	0	0	36.1163
											0	0	141.279	413.197	3761.27	9971.67	14083	0	0	35.7345
											0	0	138.737	405.76	3693.48	9791.7	13828.9	0	0	35.1567
											0	0	135.888	397.454	3618.1	9592.2	13547	0	0	34.4851
											0	0	132.099	386.363	3517.18	9325.11	13169.6	0	0	33.4992
											0	0	126.871	371.082	3378.08	8955.99	12648.4	0	0	32.2218
											0	0	121.674	355.88	3239.74	8589.71	12130.9	0	0	30.8823
											0	0	117.815	344.634	3137.65	8319.28	11748.8	0	0	29.9056
											0	0	115.473	337.754	3074.91	8153.12	11514.1	0	0	29.2068
											0	0	114.064	333.617	3037.08	8052.39	11372.1	0	0	28.7979
											0	0	113.187	331.06	3013.84	7990.75	11285	0	0	28.5557
											0	0	113.721	332.627	3028.15	8028.81	11338.7	0	0	28.6646
											0	0	115.144	336.783	3065.95	8128.92	11480.1	0	0	28.9772
											0	0	118.113	345.455	3144.84	8338.11	11775.6	0	0	29.6522
											0	0	121.611	355.705	3238.34	8586.54	12126.2	0	0	30.49
											0	0	125.737	367.787	3348.58	8879.63	12539.7	0	0	31.5103
											0	0	130.644	382.114	3478.62	9223.14	13025.4	0	0	32.6873
											0	0	135.353	395.881	3603.96	9555.67	13495	0	0	33.7861
											0	0	138.951	406.427	3700.28	9811.98	13856.5	0	0	34.6968
											0	0	142.703	417.385	3799.76	10074.7	14228	0	0	35.6187
											0	0	145.851	426.573	3883.23	10295.8	14540.4	0	0	36.3533
											0	0	147.895	432.571	3938.05	10441.7	14746.1	0	0	36.8848
											0	0	149.338	436.805	3976.8	10545	14891.7	0	0	37.2889
											0	0	150.164	439.222	3998.62	10602.1	14972.8	0	0	37.5384
											0	0	151.177	442.162	4025.21	10672.3	15072	0	0	37.7571
											0	0	152.299	445.439	4055.01	10751.2	15183.6	0	0	37.9931
											0	0	153.215	448.116	4079.38	10815.9	15274.8	0	0	38.1832
											0	0	154.04	450.526	4101.3	10874	15356.9	0	0	38.3568
											0	0	155.656	455.246	4144.22	10987.8	15517.6	0	0	38.748
											0	0	157.954	461.979	4205.67	11151.1	15748	0	0	39.2802
											0	0	160.766	470.219	4280.9	11351.1	16030.3	0	0	39.908
											0	0	163.622	478.585	4357.25	11554.2	16316.8	0	0	40.5835
											0	0	166.359	486.554	4429.32	11744	16585.4	0	0	41.1813
											0	0	168.971	494.199	4499.07	11929.3	16847	0	0	41.7443
											0	0	171.693	502.179	4571.97	12123.4	17120.7	0	0	42.3088
											0	0	173.986	508.893	4633.23	12286.4	17350.6	0	0	42.7498
											0	0	175.357	512.91	4669.9	12383.9	17488.2	0	0	43.0108
											0	0	176.131	515.177	4690.6	12439	17565.9	0	0	43.1658
											0	0	176.398	515.962	4697.78	12458.1	17592.9	0	0	43.2262
											0	0	176.843	517.266	4709.7	12489.8	17637.6	0	0	43.3095
											0	0	177.555	519.352	4728.76	12540.6	17709.2	0	0	43.4322
											0	0	178.68	522.648	4758.83	12620.6	17822	0	0	43.5983
											0	0	179.524	525.121	4781.43	12680.8	17906.9	0	0	43.7292
											0	0	180.026	526.592	4794.88	12716.6	17957.4	0	0	43.8019
											0	0	180.388	527.65	4804.54	12742.3	17993.7	0	0	43.8435
											0	0	180.745	528.697	4814.09	12767.7	18029.5	0	0	43.8778
											0	0	181.153	529.89	4824.98	12796.7	18070.4	0	0	43.9148
											0	0	181.8	531.787	4842.36	12843.1	18135.8	0	0	44.0065
											0	0	182.115	532.711	4850.78	12865.4	18167.4	0	0	44.0531
											0	0	182.283	533.203	4855.26	12877.4	18184.2	0	0	44.0752
											0	0	182.295	533.238	4855.59	12878.2	18185.4	0	0	44.0767
											0	0	181.767	531.693	4841.52	12840.9	18132.6	0	0	44.0279
											0	0	181.369	530.527	4830.86	12812.5	18092.6	0	0	43.9778
											0	0	181.186	529.991	4825.95	12799.4	18074.1	0	0	43.9511
											0	0	181.111	529.77	4823.94	12794	18066.6	0	0	43.9473
											0	0	180.898	529.149	4818.27	12778.9	18045.3	0	0	43.9284
											0	0	180.58	528.216	4809.74	12756.2	18013.3	0	0	43.8877
											0	0	180.2	527.101	4799.54	12729	17974.9	0	0	43.8333
											0	0	180.133	526.907	4797.77	12724.3	17968.3	0	0	43.8276
											0	0	180.131	526.899	4797.7	12724.1	17968.1	0	0	43.829
											0	0	180.163	526.995	4798.57	12726.4	17971.3	0	0	43.8297
											0	0	180.492	527.957	4807.35	12749.8	18004.2	0	0	43.861
											0	0	180.882	529.1	4817.8	12777.6	18043.5	0	0	43.9123
											0	0	181.156	529.901	4825.12	12797.2	18071	0	0	43.9434
											0	0	181.277	530.255	4828.36	12805.8	18083.2	0	0	43.954
											0	0	181.297	530.312	4828.86	12807.1	18085	0	0	43.9446
											0	0	181.46	530.793	4833.27	12818.9	18101.7	0	0	43.9775
											0	0	181.535	531.015	4835.33	12824.4	18109.4	0	0	44.0019
											0	0	181.382	530.571	4831.29	12813.7	18094.3	0	0	43.9987
											0	0	181.214	530.078	4826.81	12801.8	18077.5	0	0	43.9902
											0	0	180.924	529.23	4819.06	12781.1	18048.3	0	0	43.9632
											0	0	181.111	529.78	4824.1	12794.3	18067.1	0	0	43.995
											0	0	181.365	530.524	4830.89	12812.6	18092.7	0	0	44.0236
											0	0	181.758	531.67	4841.32	12840.3	18131.9	0	0	44.0534
											0	0	181.788	531.758	4842.14	12842.5	18135	0	0	44.0662
											0	0	181.595	531.199	4837.06	12829.1	18116	0	0	44.0625
											0	0	181.283	530.276	4828.49	12805.7	18083.3	0	0	44.0362
											0	0	181.004	529.451	4820.85	12785.1	18054.4	0	0	43.9987
											0	0	180.86	529.023	4816.9	12774.5	18039.4	0	0	43.9783
											0	0	180.781	528.79	4814.75	12768.7	18031.3	0	0	43.9676
											0	0	180.75	528.7	4813.93	12766.5	18028.2	0	0	43.9644
											0	0	180.747	528.692	4813.85	12766.3	18027.9	0	0	43.9641
											0	0	180.747	528.692	4813.85	12766.3	18027.9	0	0	43.9641
											0	0	180.747	528.692	4813.85	12766.3	18027.9	0	0	43.9641
											0	0	180.323	527.441	4802.34	12735.5	17984.6	0	0	43.9017
											0	0	179.768	525.812	4787.43	12695.7	17928.5	0	0	43.8221
											0	0	179.375	524.66	4776.89	12667.6	17888.9	0	0	43.7663
											0	0	179.448	524.873	4778.85	12672.9	17896.2	0	0	43.7767
											0	0	180.165	526.978	4798.12	12724.3	17968.7	0	0	43.8814
											0	0	180.181	527.025	4798.55	12725.4	17970.3	0	0	43.8863
											0	0	179.804	525.922	4788.47	12698.6	17932.4	0	0	43.8329
											0	0	179.475	524.958	4779.66	12675.1	17899.3	0	0	43.785
											0	0	179.421	524.8	4778.21	12671.2	17893.9	0	0	43.7772
											0	0	180.165	526.978	4798.11	12724.3	17968.7	0	0	43.8841
											0	0	180.299	527.373	4801.73	12733.9	17982.3	0	0	43.9022
											0	0	180.173	527.001	4798.32	12724.8	17969.5	0	0	43.8851
											0	0	180.218	527.136	4799.59	12728.2	17974.3	0	0	43.8913
											0	0	180.45	527.813	4805.73	12744.5	17997.3	0	0	43.9155
											0	0	178.066	520.823	4741.82	12574.2	17757.1	0	0	43.5714
											0	0	177.542	519.286	4727.79	12536.9	17704.5	0	0	43.4899
											0	0	177.643	519.582	4730.5	12544.1	17714.7	0	0	43.5059
											0	0	178.338	521.62	4749.11	12593.7	17784.6	0	0	43.6134
											0	0	178.53	522.183	4754.26	12607.4	17803.9	0	0	43.6425
											0	0	162.975	476.666	4339.41	11505.8	16248.9	0	0	40.4464

## Sheet: (8) Melt summary
Melt integration in synchronous scenario (mm)					Melt integration in asynchronous scenario (mm)
Time interval	IA	JAR	Melt excess		Time interval	IA	JAR	Melt excess
22-21 ka	550.5	508.899	0.0755704		22-21 ka	550.5	0	1
21-20 ka	3742.1	3460.05	0.0753719		21-20 ka	3742.1	0	1
20-19 ka	13995.3	12940.5	0.0753707		20-19 ka	13995.3	162.975	0.988355
19-18 ka	15878.6	14680	0.0754848		19-18 ka	15878.6	476.666	0.969981
18-17 ka	22476.7	20775.4	0.0756928		18-17 ka	22476.7	4339.41	0.806938
17-16 ka	31212.8	28842.6	0.0759349		17-16 ka	31212.8	11505.8	0.631376
22-16 ka	86281	79751.5	0.0756773		22-16 ka	86281	16248.9	0.811674
June 21, 22 ka	0	0	0		June 21, 22 ka	0	0	0
June 21, 20 ka	3.71907	3.51634	0.054511		June 21, 20 ka	3.71907	0	1
June 21, the present-day	47.0651	44.5758	0.0528896		June 21, the present-day	47.0651	40.4464	0.140627
