# Supplementary material for: Asynchronous glacial dynamics of Last Glacial Maximum mountain glaciers in the Ikh Bogd Massif, Gobi Altai mountain range, southwestern Mongolia: aspect control on glacier mass balance
Source: Copernicus journal article supplement (doi:10.5194/tc-17-2409-2023), 2023-06-21
Supplement: Supplementary file 1 [file tc-17-2409-2023-supplement.zip › tc-17-2409-2023-supplement-title-page.pdf]

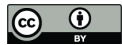

*Supplement of*

**Asynchronous glacial dynamics of Last Glacial Maximum mountain glaciers in the Ikh Bogd Massif, Gobi Altai mountain range, southwestern Mongolia: aspect control on glacier mass balance**

**Purevmaa Khandsuren et al.**

*Correspondence to:* Yeong Bae Seong (ybseong@korea.ac.kr)

- tc-17-2409-2023-supplement-title-page.pdf
- Supplementary 1\_Temperature and precipitation data since 22 ka\_221128.xlsx
- Supplementary 2\_ 2D ice surface modelling result\_221128.xlsx

The copyright of individual parts of the supplement might differ from the article licence.
